# Supplementary material for: Mosaic Evolution of Molecular Pathways for Sex Pheromone Communication in a Butterfly
Source: MDPI journal article supplement (doi:10.3390/genes13081372), 2022-07-31
Supplement: s1 [file s1]

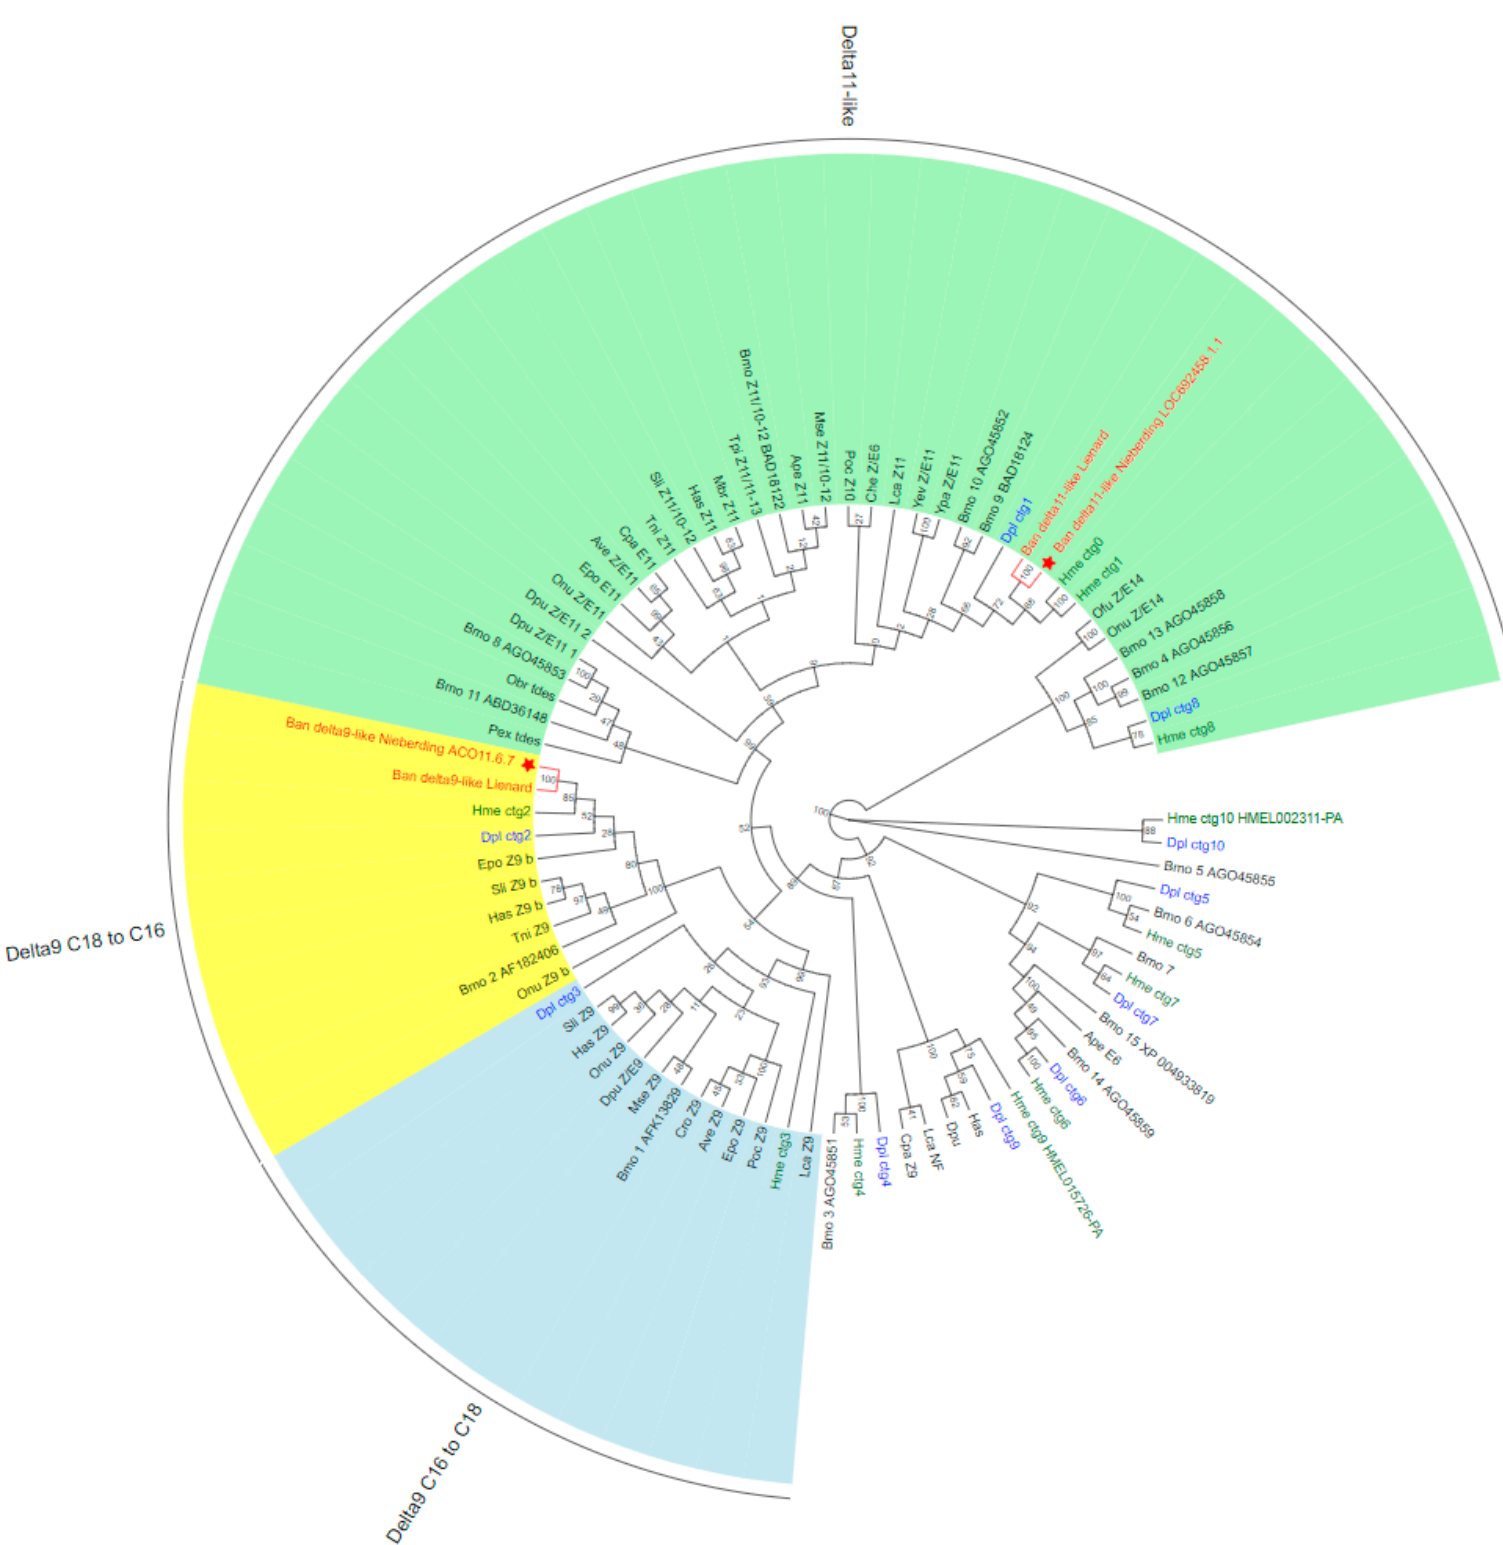

**Supplementary Figure S4:** Phylogenetic tree of desaturases after [36] (in red), and including our *B. anynana* candidate  $\Delta 9$  and  $\Delta 11$  desaturases (Ban delta9-like Nieberding and Ban delta11-like Nieberding, highlighted in red and preceded by a red star), comprising a representative set of moth and butterfly desaturases. Sequence abbreviations correspond to species names as described in [36] : Ape, *Antheraea pernyi*; Ase, *Agrotis segetum*; Ave, *Argyrotaenia velutinana*; Bmo, *Bombyx mori*; Che, *Choristoneura herana*; Cpa, *Choristoneura parallela*; Dpu, *Dendrolimus punctatus*; Epo, *Epiphyas postvittana*; Has, *Helivocarpa assulta*; Har, *Helicoverpa armigera*; Hvi, *Heliothis virescens*; Hsub, *Helicoverpa subflexa*; Lcap, *Lampronia capitella*; Mbr, *Mamestra brassicae*; Obr, *Operophtera brumata*; Onu, *Ostrinia nubilalis* (Ofu, Ola, Onr.za, Opa, Osc, Oza and Oze correspond to other *Ostrinia* species); Pex, *Planotortrix excessana*; Poc, *Planotortrix octo*; Tni, *Trichoplusia ni*; Tpi, *Thaumetopoea pityocampa*; Yev, *Yponomeuta evonymella* (Yro and Ypa correspond to other *Yponomeuta* species). We used maximum likelihood inference to reconstruct the phylogeny using the standalone version of PhyML14 and the WAG+I+G model as determined by performing model selection in Topali v2.515 as described in [36]. The cladograms were visualized and prepared using the online tool EvolView v2 (<https://evolgenius.info/evolview-v2/#login>). Numbers at the nodes indicate bootstrap values for 100 replicates.
