# Supplementary material for: Mosaic Evolution of Molecular Pathways for Sex Pheromone Communication in a Butterfly
Source: MDPI journal article supplement (doi:10.3390/genes13081372), 2022-07-31
Supplement: s1 [file s1]

# Supplementary File S4: Phylogenetic reconstructions for the reductase gene family

Aligned amino acid sequences used for the reductase phylogenetic reconstruction:

>Ase\_pgFAR

```
-----
-----MPV
LTSRED-EKLSVPEFYAGKSIFV-----TGGTGFLGKVFIEKLLYCCPD
IDKIY----MLIREKKNLSIDERMSKFLDDP--LFSRLKEER---PGDL-EKIVLIPGD
ITAPNLGLSAENERILLEKVSVIINSAATVKFNEPLPIAWKINVEGTRMLLALSRRMKR-
IE-----VFIHISTAYSNASSD--RIVV-----DEILYPAPADMMDQVYQLVK--
--DGVTEEETERLLNGLPNTYTFTKALTEHLVAEHQTY--VPTIIRPSV-----
-----VASIK--DEPIRGWLC--NWFGATGISVFTAKGLNRVLLGKASNI
VDVIPVDYVANLVIVAGAKSGG---Q-KSDE-----LKIYNCCSSDCNPVTLKKIHK
EFT-EDTIKNKS--HIMP-LPGWVFTKYKWLLTLLTIIFQMLPMYLADVYRVLTGKIPR
-----YMKLHHLVIQTRLGIDFFTSHSWVMKTDREVLFGLSLS-LAEKHMFPDCP
SSIDWTD--YLQSYCYG---VRRFLEKK----K-----
-----
```

>Hsub\_pgFAR

```
-----
-----MVV
LTSKE--TKPSVAEFYAGKSVFI-----TGGTGFLGKVFIEKLLYSCPD
IGNIY----MLIREKKGLSVSERIKHFLDDP--LFTRLKEKR---PADL-EKIVLIPGD
ITAPDLGITSENEKMLIEKVSVIIIHSAATVKFNEPLPTAWKINVEGTRMMLALSRRMKR-
IE-----VFIHISTAYTN--TN--REVV-----DEILYPAPADIDQVHQYVK--
--DGISEEETEKILNGRPNTYTFTKALTEHLVAENQAY--VPTIIVRPSV-----
-----VAAIK--DEPIKGWLG--NWYGATGLTVFTAKGLNRVIYGHSSNI
VDLIPVDYVANLVIAAGAKS-----S-KSTE-----LKVYNCCSSACNPITIGKLMS
MFA-EDAIKQKS--YAMP-LPGWYIFTKYKWLVLLLTLFQVIPAYITDLYRHLIGKNPR
-----YIKLQSLVNQTRSSIDFFTNSWVMKADRVRELFASLS-PADKYLFPDCP
VNINWRQ--YIQDYCWG---VRHFLEKK----T-----
-----
```

>Has\_pgFAR

```
-----
-----MVV
LTSKE--TKPSVAEFYAGKSVFI-----TGGTGFLGKIFIEKLLYSCPD
IGNIY----MLIREKKGLSVSERIKQFLDDP--LFTRLKEKR---PADL-EKIVLIPGD
ITAPDLGITSENEKMLIEKVSVIIIHSAATVKFNEPLPTAWKINVEGTRMMLALSRRMKR-
IE-----VFIHISTAYTN--TN--REVV-----DEILYPAPADIDQVHQYVK--
--DGISEEETEKILNGRPNTYTFTKALTEHLVAENQAY--VPTIIVRPSV-----
-----VAAIK--DEPIKGWLG--NWYGATGLTVFTAKGLNRVIYGHSSYI
VDLIPVDYVANLVIAAGAKS-----S-KSTE-----LKVYNCCSSACNPITIGKLMS
MFA-EDAIKQKS--YAMP-LPGWYVFTKYKWLVLLLTLFQVIPAYITDLYRHLIGKNPR
```

-----YIKLQSLVNQTRSSIDFFTSHSWVMKADRVRELFASLS-PADKYLFPCDP  
TDINWTH--YIQDYCWG---VRHFLEKK-----TTNK-----

-----  
>Har\_pgFAR

-----MVV  
LTSKE--TKPSVAEFYAGKSVFI-----TGGTGFLGKVFIEKLLYSCPD  
IENIY----MLIREKKGLSVSERIKQFLDDP--LFTRLKDKR---PADL-EKIVLIPGD  
ITAPDLGINSENEKMLIEKVSVIIIHSAATVKFNEPLPTAWKINVEGTRMMLALSRRMKR-  
IE-----VFIHISTAYTN--TN--REV V-----DEILYPAPADIDQVHQYVK--  
--DGISEEDTEKILNGRPNTYTFTKALTEHLVAENQAY--VPTIIVRPSV-----  
-----VAAIK--DEPLKGWLG--NWFGATGLTVFTAKGLNRVIYGHSSYI  
VDLIPVDYVANLVIAAGAKS-----S-KSTE-----LKVYNCCSSSCNPVTIGTLMS  
MFA-DDAIKQKS--YAMP-LPGWYIFTKYKWLVLTLFLFQVIPAYVTDLSRHLIGKSPR  
-----YIKLQSLVNQTRSSIDFFTNSHWSVMKADRVRELYASLS-PADKYLFPCDP  
TDINWTH--YIQDYCWG---VRHFLEKK-----SYE-----

-----  
>Hvi\_pgFAR

-----MVV  
LTSKE--TKPSVAEFYAGKSVFI-----TGGTGFLGKVFIEKLLYSCPD  
IVNIY----MLIREKKGLSVSERIKQFLDDP--LFTRLKDKR---PADL-EKIVLIPGD  
ITAPDLGITAANEKMLIEKVSVIIIHSAATVKFNEPLPTAWKINVEGTRMMLALSRRMKR-  
IE-----VFIHISTAYTN--TN--REV V-----DEILYPAPADIDQVYQYVK--  
--EGISEEDTEKILNGRPNTYTFTKALTEHLVAENQAY--VPTIIVRPSV-----  
-----VAAIK--DEPLKGWLG--NWFGATGLTVFTAKGLNRVIYGHSNYI  
VDLIPVDYVANLVIAAGAKS-----N-TSSE-----LKVYNCCSSSCNPVKIGTLMS  
MFA-DDAIKQKS--YAMP-LPGWYIFTKYKWLVLTLFLFQVIPAYITDLSRHLVGKSPR  
-----YIKLQSLVNQTRSSIDFFTNSHWSVMKADRVRELYASLS-PADKYLFPCDP  
VNINWTQ--YLQDYCWG---VRNFLEKK-----T-----

-----  
>Dpl-ctg3

-----MYPKIAESYDGQSVFM-----TGGTGFLGKVLLEKLLYSCPG  
INKVY----LLVREKQNATVQQRIQKLIEP--LFARLREER---PEAL-EKISPIAGD  
ISEPKLAIKTEDEQLLAEVSIVFHVAATIKFNEPLDVAMNVNVAGTGRVLNLAQKMKN-  
IK-----AFVYVSTAYSN--TD--RKIV-----EEVIYPAPASLNEVKKLLE--  
--IGITEEQVKELIKGRPNTYTFTKALAENLVADNHGN--IPAVIIRPSI-----  
-----VTSSK--VEPVVGWID--NWFGASALLTTISKGLNRVILSDSENS  
LDLIPVDYVSNLTIVAAARC-----E-CSKN-----VTVYNCCTSGNNPIKMGLHAK  
LII-ADSKEHKF--NDVP-MPTIH-FTQYKWLVLVLTLLFQTIPAYIADLFLLLTGKKTR  
-----YTKVQAKVLFIRDTLEFFTSNNWSIRAPQTIALANSLS-SSDRILFPFNP  
TEIVWNE--YIPTYCQG---IRQYLCKK-----

>Ban\_wFAR1

-----  
-----  
-----MYQAIAECYEGQSVFM-----TGGTGFLGKVLLEKLLYSCPG  
IEKVY----LLVREKQGATAQQRVQKLLEQP--LFSRIKEEK---PQAF-EKIIPIVGD  
ISEPQLGIKAEDEELLAEKVSIVYHVAATIKFNEPFEQAMNVNVAGTGRVLNLSKRMKN-  
VK-----AFVYVSTAFSN--TD--RKVI-----EEIYPAPASLNEVKKLLE--  
--IGITDAQVKELIRGRPNTYTFTKALAENLVADNHGN--VPAVIIRPSI-----  
-----VSSSK--REPMVGWID--NWFGASALITTIMKGLNRVLLSSRDNS  
LDLIPVDYVSNIIVAAAKC-----K-CSKN-----VGVYNSSTSGENPLRIGRLAE  
LII-ADSNKHKF--YDVP-MPMVY-FTRFKWVLLITLFFQTLPAYIADIFLLIRGKKTR  
-----YVKIQSKVSFVRDTLEYFTSNTWSISSRQTTALSQSLS-PSDRYLFPCDP  
TDIDWKD--YIPTYCQG--IRQFLCKT-----  
-----

>Ban\_wFAR2

-----  
-----MYRNVNNNYKGHSVYTNGAGSRVKSLSS  
ATDNTN-EYQSIAECYKGQSVFI-----TGGTGFGKVLLEKLLYSCPG  
IDKVY----LLVRETQGATAHQRMQKLLEP--AFSRIKEEN---PQAF-EKVIPIVGD  
ITQPQLGIMAENEELLIKEVSFVYHVAATTKFNETLDIAMNVNVAGTGRVLDLSKRMEN-  
IK-----AFVYVSTAYSN--TD--REVV-----EEVLYPAPVSLNEVHKLLK--  
--IGITDAQVKELIKGRPNTYTFTKALAENLVADNHGH--VPAIIVRPSI-----  
-----VSSSK--KEPITGWID--SWYGATFLATVTMKGFNRFVSSYEYN  
LDFIPVDYVSNIIVAAARC-----K-CSDK-----VDVYNSSTSGENPLKIGAFFD  
DII-AYSCKHKF--YDIP-LPMAY-LTRYRWVMFLITLLLQTLPAYIADLFLIVGKKPR  
-----YVKLASKISAHEVLDYFPSRTWSMSARQTTALFQSLS-PSDRDQFPCDP  
TDIDWKE--YIVTYCQG--IRQFLCKS-----  
-----

>Ban\_GS8R7LM02B1WGH\_gene9

-----  
-----  
-----  
-----  
-----  
-----  
-----  
-----  
-----  
-----MSNTFWLFAFLSVVTVYGKRAT  
-----~VTIPPEYAAELVTASVGCVRNTGVDPNILDQIVQWNFQETDNVKKFI  
YCMSLASG~F~GDSGDGHLIIDKVARLVSDSNKKKDELINALKECNTLSGSDKYDTLFTV  
KCNREKQPIVFSF

>Ban\_GS8R7LM03D3OA9\_gene11

-----  
-----  
-----  
-----  
-----  
-----

-----MQDKPQVPLIVLNNGRTCPILGLGTWKQLGNVMLRQSAPGDVMRAVKDAIDVG  
YRHIDCAFVYGNEKEVGEALKTKFQEGVVKREDMFVTSKLWNTYHRPDLVEGALKASL  
AN  
LGLEYLDLYLIHWPEAYQEGGDIFPKDAEGKVIPSPVDFVDTWKAMEAQVDKGLVRSIG  
L  
SNFNKRQTDRVMKAARIKPAVVQIEVNPYINQHKLQHCRLGLAITAYSPLGSPDRPWA  
KPGEPHLLDPRLQVIAKRYNKTVAQILIRYADRWLIVIPKTVTRSRLQQNMEVDFQL  
SPQDMELLQKLECNGRFCQMDDAHPDYPFHDEY  
>Hmel-ctg1

-----  
-----

-----MYKSVAECYEGESVFI-----TGGTGFLGKVILEKLLYSCPG  
INKVY----LLVRGKANATVQQRIQNILEQP--LFSRLKKEN---PQAL-EKIVPIVGD  
ISEPKLGLKAEDEELLNTVSIVFHVAATIKFNEPLEVAVNINVGGTARVLNLCQRVPG-  
IK-----AFVYVSTAYSN--TD--RKII-----EEVVYPTPASLSEVKKLIE--  
--IGITEDQVQQLIKGRPNTYTFTKALAENVVVENKGR--VPTIIVRPSI-----  
-----VSSSK--GEPIVGWID--NWFGASALITTIAGLNRVLLASPLNT  
LDLIPVDYVANLIIVAAAKC-----E-CTKE-----VAVLNSCTSGENPIVMRRLAD  
LLI-ADSHKHKF--YDVP-MPSVH-FTRFRWVFLMTLVLQTIPAYIADIFLLIRGKRTK  
-----YMKIQNRVSLVRNTLEYFTSNNWLICAPKTRALAESLS-SEDKKQFPCNP  
RDIDWDL--YIPSYCQG---IRQFLCKS-----

-----  
-----

>Hmel-ctg7

-----  
-----

---MK-IYQPIADCYEGQSVFI-----TGGTGFLGKVLLEKLLYSCPG  
INKIY----ILIREKANVSIEERLQIIFEQP--IFKRIKCEN---PEAL-LKIVPIRGD  
VSLPDLGMTVEDKHLLIDTVSRVFHLAATVKFNEPLNIALNINVDGTQHTLSFCKNMKN-  
IK-----SFVYVSTAFSN--AD--KKII-----EEKTYPVSKTLSEIKNLID--  
--NGLDENLIKELIGGKPNNYAFTKAMAENVIVEGHGN--VPVVIVRPSI-----  
-----VSPSI--SEPLSGWID--NWFGATSLIVAAGKGFN RVVHTSADNT  
LDLIPVDYVSNAIIVAAAKC-----K-WTKD-----VPVYNSSRRNPLRMQKLGD  
LTI-ADSYKNKF--YDIP-LPFVR-FTSSKLIVFLIALFMETIPAYIADFFLLLTGKKCR  
-----YVKA VGKLVIIREKLHFFITNSIIQSQKTRNLAESLS-PSDKRIFPFNP  
IDIDWDN--YIPIYCHG---IREFLKK-----

-----  
-----

>Hmel-ctg2

-----  
-----

----MC-EYTPVADFYNGESILI-----TGGTGFLGKVVLEKLLYSCPG  
INKIY----ILIREKQNSDGPHRVQGILNQ--IFDRVKNAR---PLAP-VKVIPIVGD  
ISEPDLGLSVADDKNIRDNVLSILFHVAANIRFNEPLEIAMNVNLMGTSRTLELFRLEN-  
KK-----AFVYVSTAYTN--LD--RKYI-----EEIYPAPFSIKELKTLLD--  
--IGIDEDQVKELTKCKLNTYIFTKAMAESLVAQN-CD--LPVTVVRPSI-----  
-----ISASI--SEPKPGWID--TWMGASGVMTTIAKGFNRVLLSNPNNF  
LDLIPVDYVSNLMIVAAAKG-----I-KTGE-----VAVYNASTSGENPISIKEFMA  
LNI-SDSVKNKF--NDFP-KPGVY-YTTKKWIVILITVLLQVLPAYIADLLLFIMRKNTR  
-----YVKLQAKVTLARDIVEFFTLNNWRIRATKTCTLAHSLS-PADRNEFPFNP  
SDINWKD--YIPLYCYG---IRNFLNV---K-----  
-----  
-----

>Hmel-ctg4

-----MLRTKYKLCS  
ILLRE--KHTSVAECYEGQSAFI-----TGGTGfVgKVLVEKLLYQCPG  
IEKIY----LLLREKKNVAPHLRLQQTLEEP--IFSRIRNEK---PEVL-DKIVPIIGD  
IAKPELAMRIEDQKLLFEKVTTVFHVAASVSFDDPLDVAMNINVGGLERVFHLCHQMTA  
-  
LR-----VLLHVSTAYCN--TD--KKVI-----EEIVYPPPASLDKVNDMIA--  
--KGINNDQVKMLINKQPNTYAFKAIAETMIVEKRGV--IPTVIVRPTI-----  
-----VSASK--NEPFVGWVD--NWFGMTGLMALTLGRNRVLMCKSENV  
MDLTPVDYVSNLIIVAAAMKST----S-NDNS-----LSVYNCATSKENPLKAEKVRK  
LVV-DYSYKNKI--YDVP-YPYLH-YTTSKWVEWLIITTFNTIPAYLTDTVLLWRGKKPR  
-----YINFHISKISMRNVLEFFSSNSWEISASRTRALSASLT-PKDKENFKFDP  
IDIDWND--YFPKYCGG---VSRYMLKR---ER-----  
-----  
-----

>Hmel-ctg5

-----MFRLKQRFSG  
VSARF--IHTPVAKCYDGQSVFI-----TGATGFLGKVLLEKILYSCPG  
INKVY----LLIRENRESDVHQRIKKILDQP--LFSRLRNDY---PNAI-QKIVPIAGN  
ISKPQLGIKNEDIRILQNNVSIVFHSAATVKFDEPLDVSTNVNVNGTQRVNLCHSMKY-  
IK-----ALVYVSTAFIN--KY--CDGL-----DEKLYEPPISVTILQEIIK--  
--AGVSEDQLQKLLLEGRPNTYTFTKAVAESLVAEQHGN--IPTAIIRPSA-----  
-----ITCSK--SEPIAGWLD--NWFAVNTILMMIGNGWIRCLLSKPENV  
YDIIPVDYVANLMMVAAVRC-----D-GKNG-----VEVFNCTSSRENPLTTQVFIN  
SII-QHSSKHKN--YDFP--PHVY-LTSSKTIWNLITLIFETLPVNVADLYLTVKGKKPR  
-----YKKIQNKMNQVRGVLEYFSKHNSLPATRTRALAKNLS-PNDRETFPFDP  
RSFNWEE--YMPMYCES---VRKYLLKK-----  
-----  
-----

>Hmel-ctg6

-----MFRLKQRFSG  
VSARF--IHTPVAKCYDGQSVFI-----TGATGFLGKVLLEKILYSCPG

INKVY-----LLIRENQESDVHQRIKKILDQP--LFNRLKNDY---PHAI-QKIVPVAGN  
ISKPQLGIKDEDIQILQDKVSIVFHSAATVKFDEPLDVSTNVNVNGTQRVNLCHSMKH-  
IK-----ALVHVSTAFIN--KN--SDGL-----DEKLYDSLISVTKLQEMID--  
--AGVSEDQLQKLLDGRPNTYTFTKAMAESLVAEQHGN--IPTAIIRPSA-----  
-----ITCSK--SEPIVGWLD--NWFVUNAFLMMIGNGWLRCLLSKPEHV  
MDIIPVEYVANLMIVA A VRC-----D-GKNG-----VEVFNCTSSRENPLTTQVFIN  
SII-QHSSKHKN--YDFP--PHVY-LTSSKTIWNLITLIFETLPVNVADLYLTVKGKQPR  
-----YKKIQNKMNQVRGILEDFLKYNWSLPAPRTRALAKSLS-PNDRETFPFDP  
RSFNWEE--YMPMYCES---VRKYLLKK-----

>Bmo\_swdb1

-MIAHD-SYKSIPDFYAGKTVFI-----TGGTGFLGKVLVEKLVYSCPA  
LNKVY-----VLIRETPKQNVLQKLKQLLDSP--IFTRLKNER---PEDL-NKIVPIAGD  
LCKPNLGLEPSDEEKLIDEVSVVIHSGATVKFNDALEYAMKINYQGTEQVMRLCRKIKN-  
IK-----VFVYISTTYAH--TQ--LDII-----EEVIYPPPARVAEVYETIKRH  
G---NNEKNISKILNGQPNTYAFTKALAENLVAENHGD--IPTVVIRPSI-----  
-----ITAGI--TEPLEGWVD--TWNGATGIMHLIGKGLCRVLPGNEQNI  
LDLIPVDFVCNLALVAAAKCNR-----

-----FFRTQSKLYSIVKTLRCFIFKSWVFKCERVCALNAELS-DLDRAVFNCDP  
STIHWEQ--YAQIYFDG---VTKFLEK----PKNLRTDASNN-----

>Dpl-ctg2

-MVPTS-NYTPVSDFYNGKTIFV-----TGGTGFLGKVLIEKLLYSCPG  
ISKIY-----MLVREKRNLATDRMKKFFDCP--VFDRLKKEK---PENL-KKLKPVNGD  
LSQPCLGIDPKELQVIKDEVTIVFHFAATVKFNEPLSIAMKINVEGTEQVIDLCHSLKK-  
IE-----VFVYMSTIFSN--TDDKLNSV-----EERLYRSPKEVDEIYKMIKE-  
--NDPREVFNPVLDGRPNTYTFTKAVAENIVAQKRGV--LPTIMIRPSV-----  
-----VTPAK--EEPVRGWVA--NWMGPTATLLYLSRGWIRCHYGEDDFT  
FEIIPVDYVVNLTIIISAAKFS-----SSNHQVESWPTFCF  
FIV-GVIITPSI---DIPFPWIT-FSRSLWFLGIISFFMQLLPAYIADLYLFICGHPTR  
-----YVKMLKKYSQNMSALHYFSSRTWYMTANRSQELIDGLS-AEDQKIFPCSP  
ASIDWSE--YMATYLHG---VYRFLKLS---HY-----

>Hmel-ctg3

-----MAS  
LSNTIP-NNSSISQYYANKSIFI-----TGGTGFLGMILIEKLLYSCPD  
IKKIY-----ILIRRKKSVLPEERLKQLINGK--IFDRIRKKC---PDNL-SKIVLVKGD

LIEFDLGLNPKELKMLQDEVSVVFHLAATLKFNEPLSVAMKVNVEGTREVLRVVSQSMK  
N-

IE-----IFVYMSTIFSN--ADHERSTI-----VEELYPSPKDINEVYEMINQ-  
--NNPNETFCPELLDRRPNTYTFSKAIAENIVAENRGA--LPTIIIRPSV-----  
-----VTSCY--NEPMEGWIA--NWMGPTPIFTLVGQGLIRCLYGKTHYT  
FEIIPADYVVNLTLCATAKH-----Q-GGKE-----LSIYHSCSTADNPITLAETSE  
YVS-KESVKQKF--NLLP-YPGMM-LIENNWLLYLLHFIFHVCPAFIADLLLFIGHPLR  
-----YVKLLQKMTYCMKVLKYFSSRSWAMKATNARGLLNSLS-DVDKREFPCDP  
VNIKWDE--YFPIYLF--IRKYLLKM----K-----

-----  
-----

>Yro\_pgFAR

-----  
-----

--MVQL-KEDSVAAFYAEKSIFI-----TGGTGFLGKVLIEKLLYSCKA  
VDQIY----VLIRKKKDQTPSERIAQLLESE--LFSRLRKDD---PSAL-KKVVPVVG  
LTMPNLGLSAAVEDLIVSKVTVFHVAATVKFNERMKNALVNNVEATREVINLCHRLEK  
-

VD-----AFIHVSTAYSN--TD--QKV--EERVYPPAPLSEVYAFVKN-  
--YGDDMDIIQNLLNGRPNTYTYTKALAEDIVLKEHGG--IPTAIIRPSI-----  
-----VLSVL--KEPIGWLD--NWNPTGLLHASSQGVHCSMLGSGSNV  
ADLIPVDIVTNLMIVVASRC-----R-KSNG-----LKVYNCSGTTNPITYQAFTK  
MFL-DSCISRGW--NKVP-FPLLI-FVKWAFLNRVLKFLLVIVPFFLIDVYLRFFGK-PN  
-----YMRMITYTKKAEDLMTFFTSHEWQFKDGNVRDLINMMS-PEDRKIFYCDP  
EEIQWKP--YFDDYCVG---VFKYLLKR----KV-----

-----  
-----

>Ypa\_pgFAR

-----  
-----

--MVQL-KEDSVAAFYAEKSIFI-----TGGTGFLGKVLIEKLLYSCKA  
VDQFY----VLIRKKKDQTPSERIAQLLESE--LFSRLRKDD---PSAL-KKVVPVVG  
LTMPNLGLSAAVEDLIVSKVSVIFHVAATVKFNERMKNALANNVEATREVINLCHRLEK  
-

VD-----AFIHVSTAYSN--TD--QKV--EERVYPPAPLSEVYAFVKN-  
--YGDDMDIIQNLLNGRPNTYTYTKALAEDIVLKEHGG--IPTAIIRPSI-----  
-----VLSVL--KEPIGWLD--NWNPTGLLHASSQGVHCSMLGSGSNV  
ADLIPVDIVTNLMIVVASRC-----K-KSNG-----LKVYNCSGTTNPITYQAFTK  
MFL-DSCISRGW--NKVP-FPMLI-FVKWAFLNRVLKFLLVIVPFFLIDVYLRFFGK-PN  
-----YMRMITYTKKAEDLMTFFTSHEWQFKDGNVRDLINMMS-PEDRKIFYCDP  
VEIQWKP--YFDDYCVG---VFKYLLKR----KV-----

-----  
-----

>Yev\_pgFAR

-----  
-----

--MVQL-KEDSVAAFYAEKSIFI-----TGGTGFLGKVLIEKLLYSCKA

VDQIY-----VLIRKKKDQTPSERIAQLLESE--LFSRLRKDD---PSAL-KKVVPVVG  
LTMPNLGLSAAVQDLIVSKVSIIFHVAATVKFNERMKNALANNVEATREVINLCHRLEK-  
VD-----AFIHVSTAYSN--TD--QKVV-----EERVYPPAPLSEVYAFVTN-  
--NGDDMDIIQNLLNGRPNTYTYTKALAEDIVLKEHGG--IPTAIIRPSI-----  
-----VLSVL--KEIPGWLD--NWNGPTGLLHASSQGVHCSMLGSGSNV  
ADLIPVDIVTNLMIVVASRC-----K-KSNG-----LKVYNCSGTTNPITYQAFTK  
MFL-DSCISRGW--NKVP-FPMLL-FVKWAFLNRVLKFFLVIVPFFLIDVYLRFFGK-PN  
-----YMRMITYTKKAEDLMTFFTSHEWQFKDGNVRDLINMMS-PEDRKIFYCDP  
VEIQWKP--YFDDYCVG---VFKYLLKR----KV-----  
-----  
-----

>Dpl-ctg1

-----MASCLGG  
HFGLNQ-DYIPVADFYADKSIFV-----TGGTGFMGKVLVEKLLRSCPK  
IKKIY----LLMRPKRGQDVASRLTELQSP--LFESLRKER---PQEL-NKIVPIVGD  
ITEPELGISPADQEMLCQKVSUVFHSAAATVKFDEKLKLSVTINMLGTQQLVQLCHRMLG-  
LE-----ALVHVSTAYCN--CE--RERV-----EETVYSPPAQPEHVVTLVQTL  
N-DELVDRLITPDVVGDRPNTYTFTKALAEDMLIKECGN--LPVAIVRPSI-----  
-----VLSSV--REPVKGWVD--NWNGPNGIIAAVVGKGVFRTMLGNGTRV  
ADLVPVDTVINLMIVCAWRTHL---R-RGDG-----VVVYNCCTGQQNPITWQRFVK  
TSF-KYMRKHPF--SEVVWYPGGD-ITSSRFQHGILSLLQHRLPAVLIDLVARITGSKPV  
-----MVRVQNKLEKASACLEYFTTRQWAFADNNVQALCRSLS-PEDRDTDFDFDV  
TNINWDG--YIESYVLG---IRRFLFKE----SPHTLPKSRTIMRRLHIVHVLGQVLAV  
LFLWRFVFLRSASLRSVWRSIVELLTRAARMLAVA-----  
-----

>Bmo\_swdb12

-----MASCVGA  
NYSSGS-DYTPVAEFYAEKSVFV-----TGGTGFMGKLFVEKLLRSCPK  
IKKIY----LLMRPKRGQDVASRLTELQSP--VFETLRKER---PQEL-NKIVPIVGD  
ITEPELGISQTDQMLLCQMVS AIFHSAATVKFDEKLKLSVTINMLGTQQLVQLCHRMLG-  
LV-----ALVHVSTAYCN--CE--RERV-----EETVYAPPADPGHVVALVQTL  
P-DELVDRLITPHLVVHRPNTYTFTKALAEDMLIKESGN--LPVAIVRPSI-----  
-----VLSSV--REPVKGWVD--NWNGPNGIVAAVVGKGIFRTMLGSGDKV  
ADLVPVDTVINLMIVCAWRTHL---R-RDQG-----VVVYNCCTGQQNPITWKRFVK  
SSF-KYMRKHPF--TEVVWYPGGD-ITSNRLKHNVLTLMQHRAPAVLMDLVSRTTGKNKPM  
-----MVRVQNKLEKAAACLEYFTTRQWSFADDNVQALCLLLS-PEDRRTDFDFDV  
KNIDWDA--YIESYVLG---IRRFLFKE----SPETLPKSRSLLKRLHIIHILTQVAAV  
FFIWRFLFSRSEVLRGLWRRIVDLLTRAARLLAIA-----  
-----

>Dpl\_FAR3

-----MSLD  
DNDLDS-LPDRIAETFAGLTLLV-----TGGTGFMGKVLVEKLLRKCPD  
IAKIM----LLVRPKKGKSPKQRLEEMLNDE--LFAKLRSRGGVEPLL-EKLQIVTGD  
VSAPDLAISDTDRLDVIENVHIVVHAAATIRFDEELKKAFLNVRGTKLILD LAKQCKK-



LK-----LFIHISTAYCH--LH--EKLL-----EEKPYPPPANPHKIEAMEWM  
T-DEAVATITPNLLSKLPNSYAFTKALGEALAVEAMEH--IPVIVLRPSI-----  
-----GAGKGVIRTMYSCKSNSY

ADYLPVDVDFINGIMICVWNYIK---L-GDTK-----SNVINFTSSAEIKVTWLEMID  
AGREIIMNRVPL--NNVVWYPGGS-MKHSRLYHNICALFFHWIPAIIDTLLFCLGYKPV  
-----LMRVHRRISKGFVFEYYTNNQWDFKSDIAQTVRQKLN-PRERRDYKVDA  
IGLDISK--YFEDCIRA---ARIFILKE----SDDTLPSARRHMKIMWFVDIVAQFLFW  
ALMMYWISGWMASFYSFVVGSSNITPKAIVE-----

>Hmel-ctg10

-----MASEGYS  
SSELES-MPDRIAETFTGLHLLV-----TGGTGFMGKVLVEKLLRKCPD  
IGKIM----LLVRPKKGKTPKQRLEEMLNDE--LFGKLRALRGGVEPLL-EKLEIVNGD  
ASAPDLAISEADRQTIIDNVNIIHAAATIRFDEELKKAVLLNVRGTKLVFELGKKCKN-  
LQ-----LFIHISTAYCH--LH--EKLL-----EERPYPADPHKIIDAMEWM  
D-EETIATITPKLLSKLPNSYAFTKALGEALAVEAMEH--IPVILRPSI-----  
-----VIPIW--QEPLPGWTD--NINGPTGLLIGAGKGVIRTMYSCKSNSY  
ADYLPVDVDFINGIMICTWNYIK---N-GDTQ-----RTVVNFTSSAEIKVTWLEMID  
AGREIIMKRVPL--NGVVWYPGGS-MKHSRLYHNICALFFHWIPAILIDTLLFCLGYKPV  
-----LMRVHRRISKGFDVFEYYTNNQWDFKSDIAQTVRKS LN-PKERRDYKVDA  
IGLDILK--YFEDCIKA---ARIYILKE----TDDTLPAARRHMLM-----

>Ban\_EST6

-----MSSEGYT  
SSELES-MPDRIAETFSGMNLII-----TGGTGFMGKVLVEKLLRKVPD  
IGKIM----ILVRPKKGKTPKQRLEEMLNDA--LFEKLRTL RGSIAPLL-EKMQUIIDGD  
MSAPDLAISEANRQMIYDEVDMIIHAAATVRFDEELKKAVLLNVRGTKLILEIAKKCKN-  
LK-----LFIHISTAYCH--LH--EKLL-----EERPYPADPHKIIDAMEWM  
D-DDTIATITPKLLSKLPNSYAFTKALGEALAVEAMEH--IPAVILRPSI-----  
-----VIPIW--QEPVPGWTD--NINGPTGLLIGAGKGVIRTMYSCKGNSY  
ADYLPVDVDFINGIMIVAWHYL-----

>OnuZ3

-----MSSEGYS  
ASEVDA-MTDRIAATYAGLSVVF-----TGGTGFMGKVLIEKLLRKCTE  
IRQIY----LLVRPKKGKTPKQRLEELFQGE--LFEQLRNLRGGVEPIL-EKVT LISGD  
VSEPD LAMSEADRQLLIENVDIHAAATIRFDEELKKAVLLNVRGTKLIVELAKTCKK-  
LK-----LFIHISTAYCH--LH--EKLL-----EEKPYPPADPHQIIQAMEWM  
D-EETVAQLTPKLLDKLPNSYAFTKALGEAVVVEAMEADLIPAMILRPSI-----

-----VIPIW--QEPLPGWTD--NINGPTGLLIGAGKGVIRTMYCKSNSY  
ADYLPVDVFINGIMISAWNYIT----Y-GDKK-----SRVVNFTSSAEIKVTWLEMID  
AGREIIMNRVPL--NGVVWYPGGS-MKHSRLYHNICALFFHWIPAILIDILLFCLGYKPI  
-----LMRVHRRISKGFEVFEYYTNNQWDFKSDIAQTVRLRLN-TRERRDYKVDA  
VGLDIMK--YFEDCIKA---ARIYILKE----YDDTLPAARRHMRVMYWVDVIAQCLFW  
GLILYWISGWFPSITSVFATSDPAPTVMMA-----

>Her\_EST1

-----MASEGYS  
PSELES-MPDRIAETFTGLHLLV-----TGGTGFMGKVLVEKLLRKCPD  
IGKIM----LLVRPKKGKTPKQRLEEMLNDE--LFGKLRLRGGVEPLL-EKLEIVNGD  
ASAPDLAISEADRQAIVDNVNIIHAAATIRFDEELKKAVLLNVRGTKLVFELGKKCKN-  
LQ-----LFIHISTAYCH--LH--EKLL-----EERPYPPPADPHKIIDAMEWM  
D-EETIATITPKLLSKLPNSYAFTKALGKALAVEAMEH--IPVIILRPVY-----  
-----WXYHT--GRTVTGLEG--KSNGATGMLMGGCKGFXEAVFRKG---

-----TRNQLDAAKDIGAIAIKTH-----

>Bmo\_swdb6

-----MSSEGYS  
AEEVDS-MPDRIAASFSNMTVLI-----TGGTGFMGKVLVEKLLRKCD  
VKNII----LLVRPKKSKNPKQRLQQMFNGE--LFEQVRNMRGGVQGLL-KKVCLVSGD  
ASAPDLAISPEDRQSLVENVDIIHAAATIRFDEELKKAVLLNVRGTKLMVELAKECKK-  
LQ-----LFIHISTSCH--LH--EKLL-----EEKPYPPPADPHQVIQAVEWM  
D-EETIAAMTPKILNKLPSYAFTKALGEALAVEAMDH--IPVMILRPSI-----  
-----VIPIW--QEPIPGWTD--NINGPTGLLIDD----QCVFTQLNL-  
--LGPV--MVNLSIKDLRGHIA---R-PDKK-----SSVINFTSSAEIKVTWSEMID  
AGREIIMNRVPL--NGVVWYPGGS-MKHSRLYHNICVFFFHWIPAVFIDILLFCLGYKPV  
-----LMRVQRRINKGFEVFEYYTNNQWDFKSDIAQTVRQRLN-TRERRDYKVDA  
GGLDISK--YFEDCIRA---ARIYILKE----YDDTLPAARRHMKVMWFVDLVTRCLFW  
GFVFWLYSWTTSFGSSATTSNVFPAAVVMES-----

>Dpl\_FAR4

MQFIGD-MSRSVTEFYDGKCIFV-----TGATGFVGKVLVEKILRSLPG  
VKNVY----LLMRQKKGTSGDDRDKDLWNSR--IFDNLRANN--PDAF-NKIKLISGD  
LLKEDLGICNDDRGVIQENCNIVFHSAACVRFDQKLKDAVETNTTATLRLKLAEATMKF-  
SK-----SQLNPYKIFAS--NF--ICLI-----  
-----PPTKHSS-----

>Dpl-ctg6

---MT-PSIGVAEFYKNKTIFV-----TGGTGFLGKVLVEKLLRCCPD  
LKRIY----LLMRPKKGLNVNERIDDDYFNCR--VFEIHEKS---PKIF-DKVTVIPGD  
ILQHNLGISIEDWEKLQRETEIVFHCAACVRFDMPIRDVNLNTLGTDRVLKLADDMEK-  
LE-----VFFVHVSTSYCR--SD--LQKL-----GERLYPAKHRPQDIIDIVKWM  
D-DELLTLIQPKLIEPQPNTYSYTKSLSEDLVAQKAGK--YPIVIARPSI-----  
-----VTAAE--KEPLPGWVD--NMNGPTGLLVGCCKGVIRTMHCHASYQ  
ADAVPVDYVANACVLLGYLTAI---D-KPKE-----IRVCNITQSDQNPITWDEAIN  
LGR-VHLHEFPS--SVCLWYPGGS-TKNSKLHHMIASFFFHLLPAYFIDLLMLLMGKKTF  
-----MVKVQKRVSYGMKVLEYTTNEWFFENDFYKSLKTRIS-KQDNEVFYTD  
STFNWSD--YMRKYMKG---AREYCCKE-----DPSTLPQARKLLNR-----

>Hmel-ctg11

---MA-PSIGVPEYYVGKNIFI-----TGATGFMGKILIEKLLRSCPD  
LNKIY----FLMRPKRGQSVKERLDDFINCK--VFDSLHDKS---PKCF-DKLHVISGD  
ILQDDLGISIEDWDLQKEIQIVYHCAACVRFDMPIRDVNMNTLGTMKVLKLTGDMKK  
-  
LE-----VFFVHVSTAYCR--CE--VHTL-----EERLYPANHRPQNVMCEIKWM  
D-DDLLSYLQPKLIEPQPNTYAYTKSLTEDLVSHVVGK--YPIVIARPSI-----  
-----VIASH--KEPLPGWVD--NMNGPTGLLIGAGKGVIRSMHCNDSYL  
ADVVPVDIVVNACILLSFITAM---E-KPKE-----IKICNITQSGYNPITWGEALD  
MGR-VHVQEFPF--SVCLWYPGGS-PKSSKVHHLIAAFFFHLLPAYLVDMMCVLMGKKTF  
-----MIKIQKRVNYGLEVLQYYTTKEWFFKNDYFRSLPSLVS-KADNETFYTDV  
HV-----SVSFLIHK---IS-----

>Dpl-ctg11

---MA-PSIGVAEFYKHKTIFFL-----TGGTGFMGKVLVEKLLRCCPD  
LNKIY----LLMRPKKGQSTKERLDDYFNCR--VFDNLQERS---PKCF-DKLAVIPGD  
ILQEDLGISIEDWDKLQRETEIVFHCAACVRFDMPIRDVNMNTLGTNKVLKLADGMVN  
-  
LE-----VFFVHVSTSYCR--CE--VHTL-----EERLYPAKHRPQDVMECVKWM  
D-DELLTYLQTKLIEPQPNTYAYTKSLTEDLVSHVVGK--YPIVIARPSI-----  
-----VTAAH--KEPLPGWVD--NLNGPTGLLPQKSAGA-----K  
GKGKPLQLSLPMKVIM-----PKE-----VRICNVTQSGHNPITWGEALD

MGR-VHVQEFPF--SVCLWYPGGS-AKSSKVQHLLALFFTHLLPAYFVDLLMFLMGKKTF  
-----MVKIQKRVSYGLNVLQYYTTKEWFFDNDYYRSLSKRIS-KDDNDVFYTNL  
KTINWSA--YIRNYIKG---AREFCCKE-----DPSTLPQARKLQRQLFWLDKAVQVVIY  
FLIAYFIYYYYIIRFFVM-----

>OnuZ4

-----  
----MA-PSMTVPEYYAGKTLFI-----TGSTGFMGKVLIEKLLRSCPD  
IKKIY-----LLMRPKKGHGSKERLDGFMNCR--VFDKLGKSEH---PEQF-HKLQVVPD  
ILMEDLGLSVEDRDTLQRECQVLMHCAACVRFDMFIRDAVNMTVGTKRVLDAVSGM  
KQ-  
IE-----VVFHVSTAYCR--CE--VEVL-----EERLYPAKHRPKHVIETVNW  
D-DELLTHLQPKIIEPQPNTYAYTKSLTEDLVAQHAGK--FPIVIARPSI-----  
-----VTAAAY--KEPMPGWVD--NLNGPTGLLVGAGKGVIRTMHCNENYA  
ADIVPDMVNVNACILLGYTTAL---E-KPKE-----VQFCNIAQSGINGFTWGEALA  
LGR-IHVMIEYPF--SICLWYPGGA-PSASRLRHQVTLFLTHTLPAYTVDLLARALQQKPF  
-----MVKMQKRIQSGLEVLQYYTTKEWHFRNENLRALRTKVT-EEDDETFTYD  
TVIDWNT--YIRDYIKG---AREFVMKE-----DPSTLPQARRLNRQLYYLDTFTKIFIY  
SIIASSWMKRSISNILKMFVAA-----

>Bmo\_swdb5

-----  
----MA-PSASVAEYYAGKSIFI-----TGATGFMGKVLVEKLLKSCPG  
LNKLY-----LLMRPKKGQSSKERLDDFLGFK--LFGPLQKEN---PKCF-EKLHVVPD  
ILMDDLGISIADRELIQRECQVIFHCAACVSFGPELKKIVKLNTVATKRVLELAKDFNN-  
LE-----AFIHVSTSYCR--CE--LDLL-----EEKLYPSPHRPEHIMDCMRWM  
D-DKLV AHMQPK-----

-----PQK-----IQICNITQSGLNPITWGEALD  
MGR-VHVREYPF--SVCLWYPGGS-PKKTRIQHEIALFFTHLLPAYFVDLLLFLLGKKTF  
-----MIKVQKRINYGLEVLQYYTTKKWLFKNDNFLALRTKIS-AEDDRIFYTDI  
QEIHWND--YIREYIKG---AREFCDE-----DPSTLPQARRLQKQ-----

>Hmel-ctg12

-----MQPSVTEYYEGKSVLI-----TGATGFVGKTLVEKLLRSCPG  
VKTIY-----LLMRKKKGVSQERIRDLCSNI--IFDHLREKQ---PEAF-EKIKLVAGD  
ILEEGLGISNDDRQELQKNCNIVYHSAACVRFDQKLKIAIHINTVGTERVLKLAETMEN-  
LE-----SFLHLSTAYCR--CD--LPVL-----DEFLYPVHDPNKIMELVEWM  
D-DDTLDFLEPRLISSEPNTYSYTKAITEDLVAEYSPK--LPIAIGRPSI-----  
-----VTASW--KEPMPGWVD--NLNGPTGLLTASGKGVLRMTMLCNPSYT  
ADAVPVDVVVNGCILAYLTAI---D-KPKK-----MPIYNITLSGVQRLTWGEIIE  
LGK-HWVLKYPY--TVALWYPGGN-IKSNRLYHYTMVFLTHLIPAYLIDMLLFLLGKRTF

-----MVNVYKRISHGMKVLQFYTTKEWHFRNSNFLSLKNRIN-KNENEIFYTDL  
SELNLDA--YLKDYILG---TRKYIVKE-----DESTLPRARKLLKM-----

>Ban\_EST4

-----MAPTVAEFYEGKHVFI-----TGATGFVGKALVEKLLRSCPG  
IQTIY----LLMRPKKGMSGEDRLKELCNNL--IFDYLRDKQ---PECF-MKVKLIAGD  
VLEEELGISNDDRQELQKNCNIVIHSAAACVRFDKNLKDAVHMNTRGTLRVLKLAEATMEK

-  
IE-----AFVHLSTAYCR--CQ--LDEL-----EEKLYPAAHDPEKLMDLLEWL  
D-DDTLAYLEPKLISSEPNTYSYT-----

>Ban\_EST1

----M-TSMGVREFYAGKKIFI-----TGATGFMGKVLVEKLLRSCPD  
VETIY----ILVRRKKGQSPEARLEAFAKCG--AFEKLLEQD---AKAF-RKVRLVPGD  
IPEDNLGIPDIIIEQELQKECQIVVNNAACVSFNLVVRKAVQMNTMGTQKVLQLAEKMKK-  
LE-----VFLHVSTSFCH--DY--IDVL-----EEKIYKAKHNPLDIINMLKWM  
D-DDTLAALQPELIKPYPNTYGYTKSLSEDLVSQYSGK--FPIALA-----

>Dpl-ctg17

-----MDLML-----  
-----Q--LFEKLLEMN---PKVV-DKIKVINGD  
IMEEGLGLSPQHLEELRNECQIVFNNAASVSFNLSLKEAVKTNVMGTQKVLALADTMKK  
-  
LE-----AFVHVSTSFCH--DH--LKVV-----EEKVYPAPHSPKNVIDIISWM  
D-DETLATLEKKLVSPFPNTYGYTKCLTEQLISDHGAT--YPIAIARPSI-----  
-----VIPAF--KDPMPGWVD--NVNGPNGIMYAASRGVLHTIYCKQTTK  
TDSIPVDMAINGLIILGCLTATE-----

>Dpl-ctg5

-----  
-----  
-----  
-----  
-----M-TTDSIREFYKSKNVLV-----TGGTGFMGKVLIEKLLFSVPD  
IGNIY-----VLMRPKKGKSVNQRYEDMQRLP--IFDRLRNTK---PSSL-KKIVPLTGD  
VLFDDFGLSESDMQKISEDVSIVFHFAATLKLEAPLYENVNMNTCGTQRALNVAKKLKN  
-  
LR-----LFIHLSTAFCY--PD--YAVL-----EEKMHAPPVKPSDIMHLEWL  
D-EKKVAILTPSLLGHPNICYTFSKRLAENIVENEYEN--LPAVVVRPSI-----  
-----VCPSI--KEPVPGWVD--SLNGPVGMLMGAGKGVIRSMLCDGSLI  
AQVVPVDTCINALIAIGMIEGKRE--D-KAEL-----MPVYNVNIGHQKPTTWGEVLQ  
IGK-DYGRKYPL--AWPLWYPNGD-ITTNVYLHEFKRLFYHLLPAYCIDLLFLLRQPRF  
-----MVRVQDRISQGLQVLQYFTMRPWTFCPNFDSIQSKLD-KEEQVIFNTDL  
TTADRDA--YLQQCIEG---GRIFCLKE----DPSKIRINRAYHNFLFVLDCLVKILFW  
LLLLSFFAAAYFTPLRDVLSYGEPVVKYLPFVGRVVCDE-----

>Bmo\_swdb8

-----  
-----  
-----  
-----  
---MS-SATSVRDFYAGRNILV-----TGGTGFMGKVLVEKLLYSVPE  
IGNVY-----ILMRPKKAKTVAQRLEDLQRLP--LFDRLKNER---PNAL-NKIKAIQGD  
VLFEDFGLSNLEIENLSKEVTVFHFAATLRLEAPLKDENVNMNTSGTLRTIKVAKKLKN-  
LQ-----IFVHLSTAFCY--PD--YEVN-----GEKLYAPPAKPEHVMRLIEWL  
D-DRQLTLLTPSLLGHPNICYTFSKRLAENVVEQAYKD--LPIVIARPSI-----  
-----VCPSY--SEPMPGWVD--NLNGPVGVMIGAGKGVIRTMCDGTLS  
AQVIPVDIAINAIIGMIEGTTK--E-KSLT-----IPVYNVNIGHQKPMTWGDVLT  
VAK-DYGRKYPL--SWPLWYPNGD-ITTNVYLHEIRIFYHLVPAYCIDFLLFLMGQKRF  
-----  
-----LFVVHWVCKILFW  
LLILSFVAAAYFEPVRYVLSQGEPPVVKYLPFVASAVFKN-----

>Hmel-ctg9

-----  
-----  
-----  
-----  
-----MASEVNEWYRGRKVLV-----TGASGLMGKVLIEKLLYSVPD  
IGCVY-----ALVRSKRGKSPESRIEDMWKLP--LFSRIREEK---PHVM-KKLVPVVG  
ILFDNLGIEKNQLEEIYNEVSIVFHFAATLRLEAPLKEGLEMNTKGTLRVLEIAKRMKN-  
LV-----SFFVHLSTAFCY--PD--HGRM-----AEKVHDPADPHEVLRAASWL  
S-EEQLNLLAPSMMQHPNSYTSKRLAEALVKESYAE--IPTVVVRPSI-----  
-----VTPAY--KEPTPGWVD--NLNGPIGLMIGAGKGVIRTMHCYGHYH  
AEVIPVDIAINAILIPYYINTKI--E-RPAD-----IPVFNLTSGDDRDTTWKEVLD  
VGK-ATVRKFPF--EGPLWYPNGN-IRHNKLIHEL CVFFYHIIPAYLIDFLMLIFGQKRF  
-----MVRIQNRISVGLEVLQYFTTREWFDTHNFKALATKLN-QMDFATFPMNL

AIIEVGP--YIETCMIG---GKLFCLKE----KLENLPKARLQNNM-----

>Her\_EST2

-----MASEVNEWYRGRKVLV-----TGASGLMGKVLIEKLLYSVSD  
IGCVY----ALVRSKRGKSPESRIEDMWKLP--LFSRIREEK---PHVM-KKLIPVVG  
ILYDNLGIEKNQLEEIYNEVSIVFHFAATLRLEAPLKEGLEMNTKGTLRVLAIAKRMKN-  
LV-----SfVHLSTAFcy--PD--HGRM-----AEKVHDPPADPHEVLRAASWL  
S-EEQLNLLASSMMQQHPNSYTYSKRLAEALVKESYAE--IPTVVVRPSI-----  
-----VTPAY--KEPTPGWVD--NLNGPIGLMIGAGKGVIRTMHCYGHYH  
AEVIPVDIAINAILIPYYINTKI--E-RPAD-----IPVFNLTSgDDRDTTWKEVLD  
VGK-ATVRKFPF--EGPLWYPNGN-IRHNKLIHELcvFFyHIIPAYLIDFLMLIFGQKRF  
-----MVRIQNRIsvGLEVLQYFT-----

>Ban\_EST5

-----MASEVNEWYRGRKVLV-----TGASGLMGKVLIEKLLYSVPD  
IGCVY----ALVRSKRGKTPESRIEDMWKLP--LFSRIREEK---PHAM-KKLVPVTD  
IMYDELGIEKAQLEEIYDEVsIVFHFAASLRLEAPLREGLEMNTKGTLRVLDMAKKMKK-  
LV-----SfVHLSTAFcy--PD--YERM-----AEKVHDPPANPHEVLRAASWL  
T-DDQLNALAPSLMQLHPNSYTYSKRLAEALVRESYAE--IPTVVVRPSI-----  
-----VTPSH--KEPTPGWVD--NLNGPIGLMIGAGKGVIRTMHRYGHYH  
AEVIPVDIAINAILIPHYIHTKI--D-RPTE-----IPVFNLTSgDDRDTTWKEVLD  
VGK-ATVRKFPF--EGPLWYPN-----

>Bmo\_swd7

-----MTSQINewYKGRKvLI-----TGSSGLMGKVLIEKLLYSVPD  
IGCVY----ALVRSKRGKSPESRIEDMWKLP--LFTRIREEK---PHVM-KKLVAVPGD  
IICDKLGIEKTKLEQIYNEVSvVFHFAASLRLEAPLKEGLEMNTKGTMrvLELSKNIKN-  
LV-----AFVHLSTAFcy--PD--YERL-----AEKVHDPPDPENVLQAASWL  
T-EQQLNILAPSIYKKHPNSYTYSKRLAEALVKESYPQ--LPAVVVRPSI-----  
-----VTPAY--KEPIAGWVD--NLNGPIGLMVGAGKGVIRSMHCYGHYH  
AEVIPIDIAINAIIVISYKIGNQS--E-RPPE-----IPTFNLTGDDRNTTWKEVLD  
IGK-ATVRKYPF--EGPLWYPNGN-IRHNKFIHDLcvFFyHLVPAYFIDFLMFLFMQKRF  
-----MVRIQNRIsvGLEVLQYFTTREWwFDTDNFKALATMLN-PVDKEVFPMDL  
SVIEDEP--YIESCMIG---GKLYCMKE----KLENLPKARLQNNILYVLDKITTvFFY

LILLYWVVLVYCAPVREVL SYGGPFVRYLPLVVILKCNCNKCNCCKKRHAESEPKIEAAHF  
G

TIHWSLAMIKIKCLIL

>Dpl-ctg9

-----  
-----MTFL

EDRDLD-NVPTIPEYYRGKVVFV-----TGGSGFMGKVLIEKLLYSCPD  
LEKIY----LLLRPKKGVQPEERLSAIYSSH--CFDRLRNER---PGVFDSKVFFVAGD  
VSDIGLGLSEDDRAILLKQTQILFHVAASVRFDDPLKVAVRLNLFGTKQVVDLAKDMKN

-  
LE-----SFVHVSTSYAN--TN--REVI-----EEILYPALGDWRETLEICETA  
D-DHTLKVLT PKFIGELPNTYVFTKQLAEHV VYEQKGK--MPIVIVRPSI-----  
-----VISSH--LEPVPGWID--NFNGPAGLMAASGKGILRTILSSPEIV  
SDYIPVDVAIKACIVASWVRGTKKL-E-ATDD-----IPIYNDCVGKLNHMTMQDMVS  
VGS-EIAQILPL--KNALWAYGVS-ITTSKFKNLEVL L F H M L P A L L V D M I L W I I G K N P M  
-----LVRVQRRITYANMALHYLTKQWTF SNRNLI ALRSKIK-DDDMRDFY YEI  
ENIDKYE--FYKQCCFG---GRKYLLKE-----TDDSLEESQAQYKRMVVDLKL VKMTFY  
GCLIWWMRREFIRDFIQIIH-----

-----  
>Dpl-ctg14

-----  
-----FMGKVLIEKLLYSCPD

LEKIY----LLLRPKKGVQPEERLSAIYSSH--CFDRLRNER---PGVFDSKVFFVAGD  
VSDTGLGLSEDDRAILLNQTQILFHVAASVRFDDPLKVAVRLNLFGTKQVVDLAKDMK  
N-

LE-----SFVHVSTSYAN--TN--REVI-----EEILYPALGDWRETLEICETA  
D-DHTLKVLT PKFIGELPNTYVFTKQLAEHV VYEQKGK--MPIVIVRPSI-----  
-----VISSH--LEPVPGWID--NFNGPAGLMAASGKGILRTILSSPEIV  
SDYIPVDVAIKACIVASWVRGTKKL-E-ATDD-----IPIYNDCVGKLNHMTMQDMVS  
VGS-EIAQILPL--KNALWAYGVS-ITTSKFKNLEVL L F H M L P A L L V D M I L W I I G K N P M  
-----LVRVQRRITYANMALHYLTKQWTF SNRNLI ALRSKIK-DDDMRHFY YEI  
ENIDKYE--FYKQCCFG---GRKYLLKE-----TDDSLEESQAQYKR-----

-----  
>Hmel-ctg15

-----  
-----MTFL

EDRDFD-DVPTIPEYYRGKTIFL-----TGGSGFMGKVLLEKLLYSCTD  
LDRIY----LLLRNKKGVPPPEHRLAAIYKSP--CFDRLRNEK---PGVFDSKVFFIAGD  
VSEIGLGLSDDDRTLINRTHIIFHVAASVRFDDHLKAAIKLNLRGTKQILELATEVRN-  
LE-----CFTHVSTSYSN--TN--REL V-----EEIMYPPLADWRDTLKICDEL  
D-DRVLQVLTA KYIGEMPNTYVFSKQLAEHV VYEYKKGK--LPVVII RPSI-----  
-----VVSSV--KDPIPGWIE--NFNGPTGIIVACGKGILRTIYSKPDII  
SDYIPVDVAIKCFIASTWSRGTKKL-E-PTDD-----VPIYN SCAGSLNNITVHELIS  
IGK-QIIAS MPL--SNMIWCFGAT-ITSSLFIFNVQVFLHLLPAVIDMLLWIFGQKTM  
-----LVKIQRRIVANLALHYytiHQWTF SNVNFVTLRSKIK-DKDQEDFY YDL



ENVDRYE--FFRQCCNA---GRKYLLHE-----TEDDIPKNRAHYARYLFLLYDCKHDRF  
WVLFPLENIKYLTFSFLRSVSRGKVPR-----

>OnuZ1

-----MGFL  
EERNFE-DVPEIPEYYKGKTIFI-----TGGSGFMGKALIEKLLYSCSD  
LDRIY----LLLRTKKGVKAEDRLAELYSTG--CFDRLREEK---PDIFSSKV FVVAGD  
VMDPGLGLSEEDRALLVNRVNIIFHVAASVRFDPLPFATKLN LGGTKEVVTLAKEVRN-  
LS-----ALVHVSTVYSN--TN--RDVI-----EEVMYPPHADWKDTLEVCDVI  
D-EHSLRVLTPKYLGDIPNTYTFTKQLAEHV VYEQKGQ--LPAVIIGPSI-----  
-----VISSV--EEPVPGWIE--NFNGPVGMLVACGKGIMRSIYTDPNLI  
SDYMPVDVSIKSIVTAAWIRGTKKL-E-PPDD-----VQIYNCCAGKLN NITMQELVD  
IGK-RLAASLPL--NDTLWNIGGS-ITTSRTIHYIKVLILHCLPAIFVDAILLLGKKPL  
-----LLKVQRRRIYIANLALRYITKEWTFDNTNFIQLRSRIK-EQDKKHFYYDI  
ENVDKEE--YFRKSCIG--GRKYLLKE----KDEDLPKAKAHHKRMVILDKTVQCIFY  
GYLFWVWNTHYIKGLT-DFLYEIFTM-----

>Bmo\_swdb3

-----MGLS  
EERDMT-HVPTIPEYYKGKSIFI-----TGGSGFIGKIVIEKLLYSCTD  
LDRIY----LLMRPKKSVSPDKRLAQLYSTP--CFDRLRKEK---PGVFQSKVLVVPGD  
VMEDGLGVSDedrKLLAERVNIVFHSAASVRFDPLKYAVRLNLNGTKEVVELAKSMH  
N-  
LS-----SFVHVSTSYSN--TN--REVI-----EEVMYPPHADWRDTLEICEKL  
D-EHTLRVMTPKYL GELPNTYTFSKQLAEHAVYEQRGQ--LPAVIVRPSI-----  
-----VIASA--DEPISGWIE--NFNGPVGIFVACGKGE-----

>Dpl-ctg13

-----MGF  
LDRDFR-DVPGIAEYYKDKTIFI-----TGGSGFMGKVLVEKLLYSCPD  
LDRIY----LLLSNKGVD AEDRLKNLYSSR--CFDRLRNEK---PDVFDKKVSFIAGD  
VGELGLGICDEDRALIINRVHIVFHVAASVRFNDSLKVAARLNLRGTREAVELAKEIRN-  
LE-----AFVHVSTSYAN--TN--RQCI-----DEVIYPASGDWRDTLEVIENV  
D-EHTLNVLT PKYLDKLPNTYVFTKQLAEHV VNEQKGK--LPIVIMRPSI-----  
-----VISSV--REPMVGWIE--NLNGPVAILIASGKGILHTMYTDPNLI  
SDYMPVDIAIKAFIAAAWARGTKKL-E-PTDD-----IHLYNCSSEIKALTMGQIVE  
LGM-EISKKIPL--DSL VWHPCGG-LTSSKLVNYVKVLLLHLLPALLVDGILKLIGKKPM  
-----LTKVQRRRIYVANLAL EYYVTQQWTFKNVNIVKLRSKIK-EEDLKEFFYEM  
ETIDIHE--YFMNSCYG--GKLYILKE----KLEDLPAARIHYRRMELLHKVVMIFK

LSVLWFIYNTSFFRDVM-NMLYAVFVG-----

>Hmel-ctg16

-----MGFL  
EECDLN-NVPDIPEYYKGKTLLI-----TGGSGFMGKVLIEKLLYSCPD  
LDKIY----MLLRSKKGVPEDRLSAIYSSR--CFDRLRRER---SDIFKKKVFFISGD  
VSEIGLGISDDDKALIVRTTNIIHFHVAASVRFDDSLKVAANLNLRGTTRELVELAKNMKN-  
LE-----VLVHVSTSYAN--TN--RQCI-----DEVIYPAFADWRDTLEICEKL  
D-NNTLNLVLTTPKYL GELPNTYVFTKQLAEHVLWEEKGK--LPIIMRPSI-----  
-----VISSV--NEPLVGWVE--NLNGPVGMLVASGKGILRTLYTDPDLV  
SDYIPVDVAIKAFIAGAWIRGTTKKL-E-PTDD-----IEVYNCSTSHMKTMTIGEIVE  
YGRNMIVHEVPL--EGMLWYVGGG-LTTSRLEYNLKVILLHLLPAIFVDLILWISGRKPM  
-----LVKLQRRISANLALHYVTQQWTFKNTTS-----

>Bmo\_pgFAR

-----MSH  
NGTLDE-HYQTVSEFYDGKSVFI-----TGATGFLGKAYVEKLAYSCPG  
IVSIY----ILIRNKKGSNTEERMRYLDQP--IFSRIKYEYH---PEYF-KKIIPISGD  
IAAPKLGLCDEERNILINEVSIVIHSAASVKLNDHLKFTLNTNVGGTMKVLELVKEMKN-  
LA-----MFVYVSTAYSN--TS--QRIL-----EEKLYPQSLNLSEIQKFAEEH  
YILGKDDDEMIKFIGNHPNTYAYTKALAENLVAEEHGE--IPTIIIRPSI-----  
-----ITASA--EEPVRGFVD--SWSGATAMAASSTLKGWNYIMYSTGEEN  
IDLIPLDYVVNLTLVAIAKN-----K-PTKE-----VTVYHVTTSDLNPISIRRFI  
KLS-EFASKNPT--SNAAPFAATTLLTKQKPLIKLVTFLMQTTAFLADFWMKTQRKEAK  
-----FVKQHNLVVRSDQLEFFPSQSWLLRCERARVLSAGLG-DSGRAVFRCDP  
SPIDWDQ--YLPIYFEG--INKHLFKN----KF-----

>Dpl\_FAR1

-----TC-N  
VKKIY----LLLRPKKGKTAIQRLNQILEDP--VYGILRSEQ--PDFA-SKLIPVEGD  
VVDLNLGIEEESRKKIIEVNIIHFHGAATINFEETIKIAALTNIRGTREILNLAKSCKQ-  
LK-----GPLNLQLGRKS--LA--LLKLLSLHHGRGTRTVESSRRLDQLVTTEDVE  
E-EGTRVQINAKK-----  
-----ILSNI-----

>Dpl-ctg7

-----  
-----MEIARRIEEKGLEKSLRV  
KQALES-GNSEVVTVYDGA VLFI-----TGGSGFIGKQLVEKILRTC-N  
VKKIY----LLLRPKKGKTAIQRLNQILEDP--VYGILRSEQ---PDFA-SKLIPVEGD  
VVDNLNGIEEESRKKIIEEVNIIFHGAATINFEETIKVAALTNIRGTREILNLAKSCKQ-  
LK-----SLVHISTAYAH--AT--RSRI--KTEIKEDFYDSPLPPDALIQLAEDL  
E-NEQLEKVIEPLRRDWPNTYTFTKAITEELVRQTATD--LPVCIVRPAI-----  
-----VISAY--KEPVPGWVDIKNAYGPSGMVLGVSLGVTHTVHADEDIM  
LDFVPVDIVNNALIVA AWTTHQSYI-A-GEKQ-----IKIY-FVTGHRNPIYYRDVFN  
VVK-EQARPLVS--PKAIWHSFAV-VTKYKLIYLLLTWLLHYIPGYIIDGVCVMIGEKPQ  
-----FIKVYKKVYSVSSVFVYFTNNDWVFLDDNALRLYDQLN-SADKELFTCDM  
QQVDMPA--MLMTWFGY---VSKFIKD-----DVTQYEYAVRKQWWLRIANVMFLTLFY  
YALYKLVA VTFACLFYFFNLSAGVYQTSV-----

>Dpl-ctg15

-----  
-----TC-N  
VKKIY----LLLRPKKGKTAIQRLNQILEDP--VYGILRSEQ---PDFA-SKLIPVEGD  
VVELNLGMEEESRKKIIEEVNIIFHGAATINFEETIKIAALTNIRGTREILNLAKSCKQ-  
LK-----SLVHISTAYAH--AT--RSRI--KTEIKEDFYDSPLPPDALIQLAEDL  
E-NEQLEKVIEPLRRDWPNTYTFTKAITEELVRQTATD--LPVCIVRPAI-----  
-----VISAY--KEPVPGWVDIKNAYGPSGMVLGVSLGVTHTVHADEDIM  
LDFVPVDIVNNALIVA AWTTHQSYI-A-GEKQ-----IKIY-FVTGHRNPIYYRDHQL  
HQF-LVARPLVS--PKAIWHSFAV-VTKYKLIYLLLTWLLHYIPGYIIDGVCVMIGEKPQ  
-----FIKVYKKVYSVSSVFVYFTNNDWVFLDDNALRLYDQLN-SADKELFTCDM  
QQVDMPA--MLMTWFGY---VSKFIKD-----DVTQYEYAVRKQWWLRIANVMFLTLFY  
YALYKLVA VTFACLFYFFNLSAGVYQTSV-----

>Dpl\_FAR5

-----  
-----MANQCGETKTLGIENKHSVGCNM  
ETDKEVPMSEVQN FYNGKNVLI-----TGATGFLGKILVEKLLRSCSG  
VENLY----LLVRQKRGKDIYTRIEEIFEDP--VFDR LKA EV---PKFR-HKIVVIPAD  
CEAAGLGLTISDRQTLIEKVNVVFHSAATVKFDEHLRAALATNVCAPLYLLGLAREIKK-  
LE-----VFIHISTAYSN--SH--LSFI-----EEKFYPCEANSGLQKMIDKM  
S-DEQINKISPAVLG SWPNTYTFTKALAEKELRENSKN--IPLGIFRPAI-----  
-----VTSTL--KEPLKCWLD--NMYGPTGVA VGTATGMLRTVQCDKTVT  
ADLVPVDSVNVNCLIVA AYNVHREFVKS-PPQE-----PPIFNYVSSVENRITWGDFTD  
LNM-ARIDKHPF--SNAVWYVSLT-LNKSSFVNACVFLHLLPAALVDGLAVCVGKKPQ  
-----MLKVYRKIHKFSSVLSYFCTKEIKFCNKRTRELWDNTS-QTDKQIFPFM  
AEVSWSS--YFDDYLAG---IRRYLFKE-----SDDTLPRARRKWTRLYYLHQIVRIVFC  
LFAIYVICKLMLSHGNLHSLVYGQSLSLKCLVPDVA VRIKHTYINIKRS-----

>Hmel-ctg20

-----  
-----  
-----VFDRLKEEV---PKFR-HKIVAIPAD  
CEAAGLGLTISDRQTLIEKVHVIFHSAATVKFDEHLRAALVINVKAPLYLLQLAKDMKG-  
LK-----VFMHISTAYSN--CH--LSHV-----EEKIYPCEANSEKLHSIVDKL  
T-DNEVNDILPTILGKWPNTYTFTKALAENEIKLNSKN--VPVAIFRPAI-----  
-----VTSTV--KEPLKCWLD--NMYGPTGVAVGTVTGMLRTVQCDPSVT  
ADLVPVDSVVNCLMVAARNVSRQYEER-AVIE-----PPIFNYVSSVENRITWGDFT  
LNM-ARIDKQPF--SNAVWYASVT-LNKSTFMNQLYIFFLHLLPAALVDALAICIGKKPK  
-----MLKVYRKIHKFSSVLMYFCTREITFCNQHTRSLWEKTS-ESDKQIFPFSM  
GEVNWDD--YFDSYLPG---IRRYLFKE----SDDTVPQARIKWKRYLLLY-----  
-----

-----  
>OnuZ5

-----  
-----MAPLLDSTPGDDAAFKIPAMAYSNDNDNDASLKTDDNNNDI  
DTRNNV-ELTQIQKFYNGKNILI-----TGATGFLGKILVQKLLRCCPG  
VENLY----LLVRQKRGKDIYTRIEEIFDDP--VFDRLKEEV---PKFR-HKIVVIPAD  
CEAAGLGLTISDRQTLTEKVNIVIFHSAATVKFDEQLRLAFNVNVKASLHVLRRLARDIKG-  
LD-----VLMHISTAYSN--SH--LDQV-----EEKFYPCNMDLETNLQTIEKM  
T-DEEINSQLSKLLGEYPNTYTMTKALAENELRINSKG--IPLAIFRPAV-----  
-----VVSSA--KEPVKCWLD--NMNGPNGIVVGS GTGILRTLQCDMQGT  
ADPVPVDMVVNCLMAAAVNVNAAAYAQSNPPPE-----PPIFNYVSSVENKITWGEFMT  
LNM-EQVDKYPF--SNAVWYISLR-LTKSWLLNRFYMFLLHLPVAVLMDGLTVCVGKKPK  
-----MLKVYKKIHKFSDVLSYFCTKDIEFCNRRQTQELWQKTS-EEDKQLFPFSM  
AELDWRD--YFQDYLYG---IRRYLFKE----NDDNLPQARIKWRLYYLHQLVTMLFY  
FLALYALWSTFSSFL-----  
-----

>Bmo\_swdb9

-----  
-----MAPVAIEENYIKTNELSTKISRIMEDYKESNYCGDCEHNIYNVNE  
DTNQDV-NMSEVQRFYSGKNVLI-----TGGTGFLGKVLIEKLLRSCPG  
VENLY----LLVRQKKGKDIYTRIEEIFEDP--VFDRLKTQV---PKFR-HKIVVVPAD  
CEAAGLGLTISDRHMLTEKVNIIIFHSAATVKFDEHLRAALTTNVRAPLHLLRLARDMRK  
-  
LD-----VLMHISTAYSN--SH--LPKI-----EEKFYACEPTCQQLETTISKL  
S-DEQINAMLPKILGPWPNTYTFTKALAEKEIRVNANG--VPVGIFRPAI-----  
-----VTSTC--KEPLKSWVD--NMYGPTGVAVGSGT-----  
-----

-----FPCV-----  
-----  
-----  
-----

-----  
>Yev\_FARI

-----MSTETVDVANQRNSN  
ANMADKKTLAKTTHLSLSNITKIENKLNIFEENLEKSRVCLDCSEKRLADTDQNSNDLEI

TENGRR-SNTDIQEFYNGKSILV-----TGATGFLGKVLVEKLLRCCPG  
VENIY-----LLVRQKKGKDIYTRIDDIFDDP--VFERLKREA---PKFR-HKIVAIPGD  
CGAAGLGLTLNDRQTLTEKVNIIHSAATVKFDEHLRTALVTNVCAPLHMLRLVRDMK  
G-  
LD-----VLMHISTAYSN--CH--LSQV-----RERFYPCSVDCDQLSGLVDKF  
T-DSEIDSLLPTILGSWPNTYAHT-----  
-----ID--NMCGLRGVVVGAATGVLRTLLCDKEVT  
AEIVPVDMMVNCLLASARDVHLSYKQSPPPAE-----PPIFNYVSSVEQRITWGGFME  
HNV-EQIGWSPL--NSAIWYFCLT-LNTSPLVNTLYEVFLHLPVAVLIDGLALCVGQSPK  
-----MLKLYRKIRKFSSVLSYFSTKEIKFCNKRTRELWERTS-EDDKQLFPFSM  
AQMDWSK--YFQGYILG---IRKYIFKE----EDDSLPAKRWTRLYYFHQIVRVIFI  
LFAVYLVWHIFSSVF-----

>Dpl-ctg16

-----  
-----MALSEQTDVKGLK  
-IEEKM-EESQIQKAFAGSTILL-----TGGTGFLGKLLVEKLLRSCPD  
VKKIY-----LLTRPKKNKDIIKRLQEQQFDDC--LYDKLRKER---PDFI-QKIQVVDGD  
VSKIGLGINDEDRKNIINEVEYIFHGAATVRFDEALKTAVLINVRGTREMLVLARACTK-  
LR-----ALVHISTAYSN--CP--LKEI-----DEKFYESPLSAEKMIDLVESM  
D-DKTLNTITPGILGEFPNTYAYTKFLAEDIVQKNSYG--LPVAVNRPSI-----  
-----VVGTA--KEPLLGWID--NVYGPTGVVVGAGVGLIHTLNCDPKAV  
ADLVPGDYVVNSVIAAAWKMAARDHP-G-NHEEAPMDQL-  
PVIYNYVSSEQPLTWEMFMK  
YNE-LYGIETPP--LQAVWAYLLI-LTPNIFYKFCCLLMHWFPAVVDGVCFLIGKKLM  
-----  
-----  
-----

>Hmel-ctg14

-----  
-----MEVHTKTDIKSDK  
HIMDNI-EDSQIQKTFAGSTIFL-----TGGTGFLGKLMVDKLLRCCPK  
IKKLY-----LLTRPKKNKEIMKRLQEQQFDDV--LYDKLRKQM---PDFM-EKIGIIQGD  
MGQPDLGISEEDRNKIINEVEFIFHGAATVRFDEALKTAVAINVRGTREILLARSCTK-  
LR-----AHVHISTAYSN--CP--LREI-----DEKFYDSNFSGDKLIDLVENI  
D-EKTLDSITLGLLGEYPNTYAYTKSAAEDIVQKYSQG--LPVAVFRPSI-----  
-----VISTA--HEPVPGWID--NVYGPTGAVVGAAAGLLHVLLCNPSVI  
ADLVPGDFVVGCIATAWKTARDYP-G-NHEEAPVDNL-  
PMTYNYVSSEQNPLTWEMFMK  
YSE-VYGLRVPS--MQAIWMYLLW-LTPSTVMYNFYFLLHWIPAYIIDFFLMIIGKKPI  
-----LKKAYVKIKKFSAVIGYFAQREWKFHNGNTLKLYKEMD-ETDKQMFNFDM  
ESLVWEE--YFQDYVKG---VRIYLLKD----PLDTIPQSRRKHFKLMLIHYFLLSLIC  
FGLFKFVW---FIAKLFI-----

>Hmel-ctg17

-----

-----MEVQTKTDIKSDK  
HIMDNI-EDSQIQAMFAGSTIFL-----TGGTGFLGKLMVEKLLRCCPK  
IKKLY----LLTRPKKNQEIMTRLQEQFEDV--LYDKLRKQM---PDFM-KKIDLIQGD  
MGKPDLDISDEDRNKIINEVEFIFHGAATVRFDEALKTAVAINVRGTREILLARSCTK-  
LR-----AHVHISTAYSN--CP--LREI-----DEKFYDSNLPGDKLIDLVENI  
N-KETLASITPGLLGEFPNTYSYTKSAAEDIVRKYSQG--LPVAVFRPSI-----  
-----VISTA--QEPVPGWID--NVYGPTGVAVGAGVGLLHVLLCNPSAI  
ADLVPSDFVVNGCIAIAWKTARDYP-G-NHEEAPEDNL-PIIYNYVSSEQNPMTWELFLK  
KCE-VHRARAPL--MQATWMYLFW-LTSSEFMYNIYFVILHWVPAYITDFFLVIIGKKPI  
-----LKKTYVKIKKFSAVIAYFAQREWKFHNGNILNLYKEMH-ETDKQMFNFDI  
ESFVWEE--YFYEYVKG---IRLFLMKD-----SLDTIPQSRKKHFKLMLIHVLLSLIS  
IGLFKFVWCIAIFLCKLFR-----

>Hmel-ctg18

-----  
-----MFAGSTIFL-----TGGTGFLGKLMVEKLLRCCPK  
IKKLY----LLTRPKKNKEIMTRLQQQFED---LYDKLKKQM---PDFM-EKIDIIQGD  
MGKPDLDGISEDRNKIINEVEFIFHGAATVRFDEALKTAVAINVRGTREILLARSCTK-  
LR-----AHVHISTAYSN--CP--LREI-----DEKFYDSNLPGDKLIDLVENI  
N-EETLASITPGLLGEFPNTYSYTKSAAEDIVRKYSQG--LPVAVFRPSI-----  
-----AASSAVFVEPSGTFVY--G-YFKVLVVVGAGVGILHVVLNPSVI  
ADMVPGDFVVNGCIATAWKTARDYP-G-NHEDAPVDNL-  
PITYNYVSSEQNPMTWKLFMK  
YIE-VYGMRVPS--IQAIWMCLCL-ITPYEFIYNFYFLVLHWIPAYITDFFLVIIGKKPI  
-----LKKAYAKIKNFSAVIAYFAQREWKFHNGNTLNLYKEMD-ETDKQMFNFDM  
ESLIWEE--YMEKYVMG---VRIYLLKD-----PVDTIPQGRKKQFKLMFKLLYITSYFH

>Ban\_EST2

-----  
-----  
MMEDKY-KESQIQKLFGASVLL-----TGGTGFLGKLLVEKLLRSCPD  
IKKLY----LLTRPKKNKEIIRLQEQFDDP--LYDKLRKVL---PDFI-EKIGIIEGD  
VGQIGLGIGEEDRTTITKEVDFIFHGAATVRFDEALKTAVEINVRGTREMLHLARSCTK-  
LR-----AYVHISTAYSN--CP--LKEI-----DEKFYDALLAGDKLIDLVENM  
D-VKTLDSITPGLLGEFPNTYAYTKSAAEDIVQKYSKG--LPVAVFRPSI-----  
-----VIGTA--RE-----

>Hmel-ctg22

-----  
---YT----ILTRPKKNKEIMKRLQEQLDDV--LYDKLRKQM---PNFI-QKISIIQGD  
IEQPYLGISEEDRNKIINEVEFIFHGAATVRFDEALKTAVAINVRGTREILLARSCTKT  
AH-----AHVHISTAYSN--CP--LTEI-----DEKFYDRNLSGDKLIDLVENL  
D-EKTLDSITPGLLGFEFPNTYAYTKSAAEDIVRKYSQG--LPVAVFRPSI-----  
-----VISTA--HEPVPGWID--NVYGPTGVVVG-GVGILRVLLCNPSLI  
ADLVPGDFVVNGCIATAWKTARDYP---EEGAPVDNL-PITYNYVSSEQNPLTWERFTN  
YSE-MNRRKMPL--MQATWMCIFW-LEPSKFLYNFYFVILHWIPAYIIDFFLVIIGKKPI  
-----LKKTYVKIKKFSAVSTYFTQREWKFHNGNTLKLKLYKEMN-KTDKQLFNFD  
KSLVWED--YFYEYVKG---IRIYLMKD----PLDTIPQSRKKQFKLMLIHIFLLSVIC  
FGLFKLVW----FIAKLFISVNPLSFRLQCDFFNRYKGFDDV-----  
-----

>Bmo\_swdb10

-----  
-----MVADIQKYSPKMMPVGEVTGFDAMD  
-KLEAL-GESQIGKMFAGTTVLL-----TGGTGFLGKLMVDKLLRCCPD  
LKKLF----LLARPKKNKDIKRLQEQLDDV--LYDKLRKER---PNFI-EKICIVEGD  
VGAINLGLSQEDRTKIANEVEFIFHGAATVRFDEALKTAVEINVRGTREMCILARSCGK-  
LK-----ALVHISTAYSN--CT--VMEI-----EERFYESSLPGDKLIDLVTM  
D-EKVINSITPGLLGDFPNTYAYTKSVAEDVVQKYSKG--LPVALFRPSI-----  
-----VIGTA--KEPVAGWID--NVYGPTGVVVGAAVGLLHALICKPNAV  
ADLVPGDMVVNACIATAWKTAKDYP-G-  
NHEDAPPPDLTPPVYNFVSSTQKPLTWSKFMK  
YNE-IYGLEVPT--VQAIYYVFM-LTSSRFAYTLYCFFLHWIPAYIIDGVAVLIGKKPM  
-----LRKAYTKISKFSEVISYFATREWKFHSGNTEGLVRELC-PADRQTFDFDL  
SRLDWSE--YFYNVVRG---VRVYLLKD----PVETVPAGLRRHNILKYSHYIFCAVLT  
FVLVRLW----AAWSLLDL-----  
-----

>Bmo\_swdb14

-----  
-----MDSALALEIEQVSRQKAL  
EEEALR-GESAVRQFYAGTTALI-----TGGTGFIGKQLIEKLLRSC-D  
VKRIY----ILARSKKGLSMEERLQLQFKDP--VYDNLRSQQ---PDFA-QKVIPVEGD  
ISELGVGLNDEDRMKLEQEVNVIFHVAATTRFVEPLKKATFINVRGTREILELAKCCKN-  
LR-----CFVHVSTAFFN--AT--KSKI---NHTIEEFYESPVPPEVMIQLAETV  
E-ECRLNAITADLIRDWPNTYCFTKAIAEDVVRTMGKD--LPVAIVRPPV-----  
-----VICTL--NEPTPGWVDMSSVIGPSGIILTILLGVMHVLLMS-DIN  
IPLAPLDYVNNAVIAAASEANKRYN-N-NEKE-----IKVYNISCSGCKIETSCLSDL  
MNN-PNTQQYAT--PKAVWYCYGF-  
ETGSDVFWLSTWLLHYIPAYVADFVFNVTSMKRP  
EG----IKSFVKMYEKIYKMSLLYGYFLRNQWNLVDDNTVAMLNQMS-KTDRILFNFDI  
SKIDWPR--YMLIWCIG---LRKFIVKD----GLKDSEYGMKKQRWLKIAHISFYTLFF  
GVVFSLLYLACRIFMYLCNLNTIAAQTLLKI-----  
-----

>Bmo\_swdb15

-----  
-----MDIALALEIEQVSRQKAL

EEEALR-GESAVRQFYAGTTALI-----TGGTGFIGKQLIEKLLRSC-D  
VKRIY-----ILMRSKKGKSMPERLQSQFNEP--VYDNLRSQQ---PDFA-RKVIPVEGD  
ISELGVGLNDEDRMKLAQEVNVIFHVAATTRFEEPLKKATFINVRGTREILELAKCKD-  
LR-----SFBVHVSTAFSN--AT--KSRI---NHNLEEKIYESPVPPEVMINLAKTV  
E-ECRLNAITADLIRDWPNTYCFTKAIAEDVVRTMGKD--LPVVIV-----  
-----LLTLMLGVMHVVLTSDIS  
IPIVPVDYVNNAVIATASDTNVRYN-K-NEKE-----IKVYNISCSGSKIETSCMSDF  
LKN-PNTLEYAT--PKAVWYCYGF-GTGSDVFWLSTWLLHYIPAYVADFVFNVTSMKRP  
EG-----IKSFBVKLYEKIYKMSMLYGYFLRNQWNFVDDNTVAMLNQMS-KTDRLFNFDV  
AKIDCSR--FMAIWCIG---LRKFILKD-----GLKNSEYAK-----  
-----  
-----

>Bmo\_swdb16

-----MDSALALEIEQVSRQKAL  
EEEALR-GESAVRQFYAGTTALI-----TGGTGFIGKQLIEKLLRSC-D  
VKRIY-----LLIRSKKGKSMQERLKSQNDP--VYDNLRSQQ---PDFT-RKVIPVEGD  
ISELGVGLNNEEDRMKLAQEVNVIFHVAATTRFEEPLKKATFINVRGTREIMELAKCKD-  
LR-----SFBVHVSTAFSN--AT--KSRI---NHDLEEKIYESPVPPEVMIQLAETV  
E-ECRLNAITADLIRDWPNTYCFTKAIAEDVVRTMGKD--LPVAII-----  
-----ILTLLGVMHVVLLMS-DIN  
IPLAPLDYVNNAVIAAASEANKRYN-N-NEKE-----IKVYNISCSGCKIETSCLSDL  
MNN-PNTQQYVT--PKAVWYCYAF-STGSDVIFWLLTWLLHYIPAYVADFVFNVTSMKRP  
EG-----IKSYC-----IAFITGFE-RDDRIRHSVTK  
IKPNASHSAYRVARVQHIHTLRLCGVCE-----  
-----  
-----

>Bmo\_swdb17

-----MDSALALEIEQVSRQKAL  
EEEALR-GESAVRQFYAGTTALI-----TGGTGFIGKQLIEKLLRSC-D  
VKRIY-----ILIRSKKGKLSMEERLQLQFKDP--VYDNLRSQQ---PDFA-RKVIPVEGD  
ISELGVGLNDEDRMKLAQEANVIFHVAATTRFEEPLKKATFINVRGTREIMELAKCKN-  
LR-----SFBVHVSTAFFN--AT--KSRI---NHTIEEKFYESPVPPEVMIQLAETV  
E-ECRLNAITADLIRDWPNTYCFTKAIAEDVVRTMGKA--LPVAIVRPPVGKYSRALLSE  
IAKVETYKYVVTGHMFACTL--NEPTPGWLDMSVIGPSGILLTAGLGVTHVVLIG-DIT  
IALAPVDYVNNTVLATAWETDKRFK-T-NEKE-----SKIYNISNSRCTLEKIA----

>Hmel-ctg13

-----MNPTAPLLDFSEDHEFVSANHLDDYYSQEDQNDAKEAEKQR  
LTKGKA-AKTDIQKFYKDQCIFL-----TGGTGFLGKVIIEKLLRACGE  
IDTIY-----VLVRSKKGKDPMTRIHEMLDDF--IFHAAHKIN---PKGJ-HKVVPVIGD



MELPGIGLSDEDRLLVSRVTIINSAAATVKFDEKLSIATGINVKGTKEVIKLAKECKN-  
LI-----AITHVSTAFSN--TH--VDFI-----EEKFYESPMSVEAL-EAVSQL  
D-DNVIESILPALLGNRPNTYCLTKAVAEEAIRTYGEG--MPICIRPSI-----  
-----VISTY--EEPVRGWTD--SVYGPTGLVVGIGTGVLRTMYFDVNKV  
ADMVPVDLTVNAIIVSAYQTAMNFKEN-QTSD-----IPIYNFVSGAQNPLKWGEFIK  
YNM-KYGMDNPT--IKAVWYYGLT-PTNNFYFFVFLDFFLHYLPALLMDVFSAVTGKRRV  
-----MLKFYTKLRKLANIMFYFSTQHWKFSDENVKDMWSSIS-AQDRAVFPFSI  
GEISWDY--MAETFLLGKNTIRFSIRNK-----  
-----  
-----

>OnuZ2

MNHSLEASPLIPTEVTRDKMERWVEAQNKGEKTEVDVYGKPSEKQIKELNIRSLSRELQ  
DNLHELENSVRIADVENQAMNPTAKILDYSEDHEFVSANQLDNYAAEDKVDAKEEEK  
RR  
LTKGKA-GKTDIQQFYKDQCVFL-----TGGTGFLGKVLIEKLLRSCDT  
VDTIY----VLIRNKKGKDARVRLHDMLEF--LFHRALDEN---PKG-IHKVVPPIGD  
MELPGLGISDEDRRTITSKVSIIINAAATVKFDEKLSVSTGINVRGTKEVLRLAKECRN-  
LR-----AITHVSTAFSN--TH--VPYI-----EEKFYDPPMSVEAL-EAVSEI  
N-EDLIDAILPTLIGKRPNTYCFTKAVAEEA VRKYGEG--LPICIVRPSI-----  
-----VVSTY--EEPVRGWTD--SVYGPTGLVVGTGTGVLRTMYMDLNKV  
ADMVPVDLTVNAILASAWHAAKNFKEN-QTSD-----IPIYNFVSGAQNPIKWGKFIE  
LNR-KYGIDKPT--TKAVWYYGLN-PTNSYFMFLFYNNFLHYLPALMVDA YCAVTGRRRA  
-----MLKLYSKVMKMANILFYFSTRDWRFS DRGVRAMWASLS-EADRAVFPFSM  
GDMSWDR--LCETFLIG--LRVYLIKD----DLSTLPEARKKWNRLFYLHQLLKVVTF  
ALVLNLAYLVL RPILSLVFGL-----  
-----

>Dpl-ctg4

-----  
-----MEWLNGNDPKIPNFN----DL  
NEPRNL-CEERIADYFQDSIILV-----TGGTG FVGKALLEKLLRSCPG  
IDTIY----ILMRPKRGLSVEQRYKELLKNQ--VFDHIRTRW---PDRL-SKLYPITGD  
VSAPNLGVSAEQ-  
QQLLNKCHTVFHSAATVRFTDPLHAAAALNVQGTASLLQLAEDMPF-  
LK-----ALVHVSTAYSN--AP--RSHI-----EERVYAPPYDPESIVRCTKML  
P-AETVEVIAESLQGEHPNPYTLTKALAESIVYSHTN---LPVCIVRPSI-----  
-----VTAAY--QEPFPGWID--NIYGVGTGIIMEISRGTYRSGYCRERYV  
VDLVPVDMVVNSCILA AWRQGS---K-KPGR-----CPVYNVTSGSINPLQWGHFTK  
LCV-KWARENPT--K-----  
-----MMKLARRFKMAAATGEYFANHEWQFSVSELTALHDEASVASDAGAFSHWP  
GHFNWES--YIGSYMLG---IRRFILKD----SIDSLPQARNKLNRLYWVHRLFQVATG  
YYLFKFLAGRLR-----  
-----

>Ban\_EST3

-----  
-----MECLNGND--LLSPNFNEIGTE  
HFNQAY-PEERIADYFHNSIILV-----TGGTG FVGKALLEKLLRSCPG  
INTIY----ILMRPKRGLSVDQRYKELLKNQ--VFDRIKAKW---PERL-SKLYPITGD

VSASN LGVSADQ-QLLKKCHTIFHSAATVKFTEPLHAATTLNVQGTATLLKLAEDMPL-  
LK-----ALVHVSTAYSN--AP--RSYI-----EERVYPPPYDPESIVKCTKML  
P-AETVNIIAESLQGDHPNPYTLTKSLAESIVYSHTE---LPVCIIRPSI-----  
-----VTAAF--QEPFPGWID--NVYGVGTGIIMEISRGTYRSGYCRERYV  
VDLVPVDMVVNSCILAAWRQGS---K-KPGH-----CPVYNVTSGSINPLQWGHFTK  
LCV-KWARENPT--KYVMWYPNFA-FTESRFVNTFWEVSCT-----  
-----FYRLSFMICYSEHRVEKL-----

>Bmo\_swdb20

-----MDDITLLTTTDKMEAFQKQMEFLNGNDPNMVNRNQECLPNY  
QLLSSC-PAEAVADFYDGSVILV-----TGGTGFVVGKALLEKLLRSCPG  
IETVY----ILMRPKRGLTVEQRYKELLKNQ--VFDHIRTRW---PERL-SKLHPITGD  
VSVQNLGVSDQ-RELLRRVTTVFHSAATVRFTEPLHVATTLNVQGTASLLKLAEDMPK-  
LK-----ALVHVSTAYSN--AP--RSYI-----EERVYPPPHDPDNIVRCTRML  
P-PETVEVIADSLQGDHPNPYTLTKALAESIVYSHTE---LPVCIVRPSI-----  
-----VTAAAS--QEPYPGWID--NIYGVGTGIIMEISRGTYRSGYCRERYV  
VDLVPVDMVVNSCILAAWRQGV---K-----  
-----QYVMWYPNFS-FTESRLINTFWETCHVLP AFLYDLLLRAQGRKAI  
-----MMKIARRFKMAAATGEYFANNEWQFGVAELQALQGEASSTRDAGQFPFWP  
AGFDWDT--YIGAYMSG---IRKFILKD-----TVDSL PYARTKLKRLFWIHKLLQAATG  
YYVFRLLAGRLR-----

>Dpl\_FAR6

-MGPPD-LFRLSARRHSEYGTFI-----N----LFKVLIERLLSTCPD  
VGKLH----LLLRPKKGVAPKRLQQLKSSQ--VFDLIRQNN---PRQL-DKLCIIPGD  
VSQPGLAIDAEHLKNL-QDVSIVFHSAATLKFDEALPNAVDQNVLSVTRLMDICDTIPN-  
LQ-----ALVHVSTAYSN--SE--LTCV-----EEKVYTPPADLGRLALVEAV  
P-KPLLANITPEYIKPKPNTYTFTKAMAEAVRCRTQR--YPVAIFRPTI-----  
-----VISSL--RHPFPGWIE--NLNGPSGVIAAAGKGLLHV FVRPDAR  
ADLLPVDIAIDTLLAVAWETAV---D-RLPT-----VRVYNC-STNSNPTTWRQFET  
ALK-KHLLNYPL--DACLWYPCGS-GVQNR YAHKALEFLLQTIPLHIAEYIIRGLGIKMK  
-----LSLITAEQKMRAMNEVLAFFALREWKFNTDNVDKLRARLS-PADAAIYNLDP  
KSISWDE--QYYNFIRG---TRKYLLKE-----KDENLDEARKHMNRMYLHKGVIFIM  
VLVFRLLVQNKNVRQVVYGT LRLLSLSFAAYKNVIESI-----

>Hmel-ctg19

-----VLIERLLSTCPD  
VGR LH----LLMRHKKGEAPEKRLVLKQSQ--VFDILRQSN---PSQL-DKLCIIPGD  
VSQPGLGITGSYLKEL-QEVSIVFHSAATLKFDEALPTAVEQNVLSVMRLMDICDTLPN-  
LQ-----ALVHVSTAYSN--PE--RNVI-----EEKVYSAPAPLPRLALVDAV

P-PPLMASITSQYIKPKPNTYTFTKAMAEAINTRPNK-TYPIAIFRPTI-----  
-----VVCSL--RHPYPGWIE--NLNGPSGVVAAAGKGLLHVFRKPDAR  
ADLLPVDIAIDTMLAVAWETAV---D-KIPE-----VRVYNC-STFENPTTWLAFEN  
SLQ-KFLPVNPM--DGCMWYPSGF-GVETKYAYKLLEMFLQTIPLHVAEYIIRTLGFKMK  
-----LSLITADKKIRAMSGVLAFFALREWHFKTDNVAKLRARLT-PSDSAIYNLDP  
KSIE-----  
-----  
-----

>Ban\_EST7

-----M  
VARPRSPCGALLPQFYAGRIFI-----TGATGFMGKVLIERLLATXPD  
IGRLH-----LLMRQKKGVTPKRLQQLIQSQ--VFDVIRQTN---PSQL-DKLCMIPGD  
VSQPELGIPLQCLRQL-QEVSIVFHSAATLKFDELLSTAVEQNVLSIIRVMDLCDTLPN-  
IQ-----ALVHVSTAYSN--PE--LNVV-----EEKVYDAPASLPRLLALVEAV  
P-TPLLANITPDI-----  
-----  
-----  
-----  
-----  
-----  
-----

>OnuZ6

-----M  
VSCKDD-VTAQIPQFYAGRSIFI-----TGATGFMGKVLVERLLTTCPD  
VDQLF-----LLMRTKRVDVGPEKRLQQLKESQ--VFDNVRQCS---PAQL-DKLCIVPGD  
ITKPQLGMTGESIAQL-RNVSVVFHSAATLKFDEALGLAVDQNVRSVRLMELCDMLPN-  
MQ-----AFVYVSTGYSN--AE--LSVV-----EERVYPPAPLEQVLALTEAM  
P-EDLMASVTRKYIHPKPNTYTFTKAIAEVAVQQHNSS--YPRAIFRPTI-----  
-----VVSAL--RTPFPGWVE--NLNGPTGVIAGVGKGLLHFFSCRRDAR  
ADMVPVDIVIDALLAVGWETAI---D-RSSE-----VRVYNC-SSYNNPTTWRTFEA  
ALS-RYIREHPM--DQVFWYPYGS-IVENGVAQKCLELLQTMPLHLADYCSRIFGIKTK  
-----LSFIMVSNRLQAMNTVLQFFSQREWKFITNNMERLRQRLT-PADAAIFNLDV  
KTINWEE--LCTNFIKG---TKKYIFKE-----KAENTPEAKKHLQRMKLLPPWCNLFHF  
NPASTTHL-----  
-----

>Bmo\_swdb18

-----MTIREGSETIYTRLLNMVPR  
PVSPYA-REPLIPQFYAGKSIFI-----TGATGFMGKVLVERLLWTCPE  
IERIF-----LLMREKKEVSPEKRLAQLKQSQ--VFDVIREYC---PGQL-EKLYLIPGD  
TTAPNLGLSVESIGLL-KEVSVVFHSAATLKFDEALNKAVDQNVRSVLSLMDICDGMNP-  
IE-----ALVHVSTAYSN--AE--LSTV-----EERVYAAPVPLQQLALADAL  
P-DQLAADLTPRLISPKPNTYTFTKALAENAVAERTNR-KYPVAIFRPTI-----  
-----VISAL--RHPFPGWIE--NLNGPSGVLVAAGKGLLHFFCCKRSAK

ADMIPVDIAIDTLIAAAWETAV---D-KLDE-----IRVYNC-SSGRNSTTWAQFEM  
AIK-KLLIEHPL--DKTYWYPSGA-AVEN-----E  
-----LSLITISERLQGMCKVLTFFSMREWDFKSDNVRKLQARLS-PQDALIYNLDP  
NTIDWDA--LYVDFVKG---TRKYLLKE-----KDQDIDEAKRHLRKMFIYVHNGFLVFVT  
ALLRLSLHAPLVRSLVLGTLRLLFTIVSSTYSRVSS-----

>Yev\_FARIII

-----MVAR  
RLSGEF-PAPTIPAFYAGKSVFI-----TGATGFMGKVLIERILATCPN  
VGCLY----LLMREKKDQSPKRLQLKQSQ--VFDVLRRTQ---PAQL-DKLRSLSGD  
TSREQLGMDSNSLQQL-REVSIVFHVAATLKFDEELRKAVEENLRSIMRLLNICDSLPH-  
IE-----ALVHVSTAYCM--AE--LAEV-----EERVYTPIVPLPTLEALVDHA  
D-EAMRQQLVQLLLGDKNPTYTFTKAMAEHAVVEHKAQ--YPVAIFRPTV-----  
-----VISSL--RSPVPGWIE--YLNPGSGVVVGAGKGLLHTFRCTKSAR  
ADLLPVDIAIGTMITCAWDVAT---N-RQAT-----PRVYNC-STYENPTTWSDFER  
CIR-KEIEQPL--DAPLWYPCAF-IAENKYVHKLVELVLQTGPLHLAEWSARAVGMKPK  
-----INLITVSRKLAMSDVLMFFSLREWRFRTEVQRLRDRLS-PQDAIYNLDV  
NTIDWRQ--HMKNFMMG---VRKYLLKE-----KDQDIEAAKKHLRKMVWVHTGVKLLL  
GLTLRLLLRGPAAQSLA-GALRLLLSLCTAVYSRLLPAA-----

>Bmo\_swdb19

-----MFVTDSTLHEGCVLQERGGT  
MADMSE-EAPILPRFYAGRSVFI-----TGGTGFMGKYTRVICVVS KPS  
LKTCNETARSVPPRPLPGPLCSGRSVGLCVQ---IFEKVRERC---PWQL-DKLRVLPGN  
LERPLLGLEPVTIARL-HQVSVVFHNAATLKFDEALRKAVDQNVRLSLVDVCDALPN-  
LE-----ALVHVSTAYS N--AE--LSRV-----EERVYAAPVPLQQLLALADAL  
P-DQLAADLTPRYIHPKNTYTFTKAMAECVLQERTSR-RYPVAIFRPTI-----  
-----VISAD--RHPVPGWIE--NLNGPSGVVVGVGKGLMHVFRACLALR  
ADFIPVDVVVDNMIAVAWETGS---E-PCGS-----LRVYNCASG-EHATRLSDFRA  
TAV-RVLRSLPL--DSGLSYPLI-VVQNRVYRLLFVLQTAPLHVAECLRQTDGQKAR  
YHNVPCVQLKVLVVQQRNRGRLRLVHYTTIVFLVLLSYKLIK-----  
-----FLNLFMNN-----

>Dpl-ctg10

-----M-EESQIKAFYSGKNLFI-----TGGTG FVGLCLIEKILRTIPD  
VGKIY----LLMRPKKGKEIADRLQEFPANP--VFEHLLQNT--SKDIF-NKLIPISGD  
VGVENLGINDNDRQILIDEVNIVIHSAATLDFEENLRPTVKINVLGTRYVMDLCQQIKN-  
LK-----VMIHVSSAYVN--SY--LKEV-----DEKVYDRPADPENIINMVNTL  
T-NDALNDVERLILKNHPNTYTFTKHLAEHEVKKCEAM--FPISIVRPTM-----  
-----IVAAL--KEPVPGWTC--SKVGPQGFLMGAAGVVRRLPLAKENI  
ADYIPVDIVVNQLLAAGWNAAR-----QNSG-----LQVYHCSTSTQNPFWSILES  
VVN-KILTNYPL--KSAVWYPHLA-FVRSLWLFRLSAIFIHFFPAVLLDMLLRITGGKPI

-----CM-----  
--LQWEE--YFVKLHLG---VRRYLNKE----TEKTLAAAKTKNNM-----  
-----

>Dpl-ctg12  
-----  
-----

----M-EESQIKAFYNGKNLFI-----TGGTGFVGLCLIEKILRTIPD  
VGKIY----LLMRPKKGKEIADRLQEFPGNP--VFEHLLQNT--SKDIF-NKLVPISGD  
VGVENLGINDNDRQILIDEVNIHSAATLDFEENLRPTVKINVLGTRYVMDLCQQIKN-  
LK-----VMIHVSSAYVN--SY--LKEV-----DEKVYDRPADPENIINMVNTL  
T-DDALNDVERLILKNHPNTYTFTKHLAEHEVKKCEAM--FPISIVRPTM-----  
-----IVAAL--KEPVPGWTC--SKVGPQGFLMGAAKGVVRRLPIAKENI  
ADYIPVDIVVNQLLAAGWNAAR-----QNSG-----LQVYHCSTSTQNPFWSILES  
VVN-KILTNYPL--KSAVWYPHLA-FVRSLWLFRLSAIFIHFFPAVLDMMLLRITGGKPI  
-----LFRLHKNVWNSLSRLEVFIFTEWKFNPNRTRELSAMMN-KTDSSELFIDV  
SKIYWEE--YFVKLHLG---VRRYLNKE----TEKTLAAAKTKNNILYYVHIIWQVMIL  
GLLWVIISWVTGLGLTQTSWVIPPIYLLYSML-----

>Hmel-ctg21  
-----  
-----

----MS-EESQVRSFYSGKNFFI-----TGGTGFVGLCLIEKILRTIPD  
VGKLY----LLIRPKKGKDITSRIQEFKHP--VFEKLLETN--TNDIF-NKLIPISGD  
VGTKDLGISEEDRQILIENNVVVHSAATLDFEESLKPTVQINVLGTRQIMELCDQMKN-  
LK-----VMIHVSSAYVN--SY--LKEA-----HEKVYDTPADVESVIDLSRKL  
S-EQALVDMEKILKEHPNTYTFTKHLAEHEVKKYSEK--FPCTIVRPTM-----  
-----IVAASW--KEPVPGWTC--SKVGPQGFLMGAAARGVVRRLPLSKDNV  
ADYIPVDVVVNQLLAAGWNAGV-----SGPG-----LTVYHCSSTQKPFKWSMLEN  
VVN-KMLQNYPL--KSAVWYPYLD-FVSSLWLFRLSAIFIHFLPAILLDMMLLRITGGKPI  
-----LFRLHKNVWNSLSRLETIFSEWKFHNTNTRELNQKLN-KVDKEIYFIDI  
QTIVWEQ--YFVNLHLG---VRKYLNHE----SEKTLPAAKNKHSM-----

>Bmo\_swdb11  
-----  
-----

----MT-EESLVRAFYSKGNFFI-----TGGTGFVGLCLIEKILRCIPD  
VGKVY----LLMRPKKGKEISQRLEEFKPNL--VFEKLLETN--TTDIF-KKLVPISGD  
VGEANLGLSPQDRQLLIENNVVVIHSAATLDFQENLRPTVRINLLGTRQVMGLCKEIKN-  
LK-----VMIHVSSAYVN--SY--LTEV-----HEKVYPEPEEVEKVISLVGTL  
S-DEALDEIEPKILKDHPNTYTFTKHLAEHEVAKCAEL--FPCTIVRPTM-----  
-----IVASW--KEPVPGWTC--SKVGPQGFLMGASKGVVRRLPLAKENI  
ADYIPVDVVVNQLLVAGWHAAS-----ARSG-----LTVYHCSSTQKPFKWSMIES  
SIN-GMLHKYPL--KSAVWYPHLK-FVPSLWLFRLSAIFVHFFPALLLDMMLRVTGGRPI  
-----LIRLHKNVWNSLNRLEKFIFSEWKFHNTNTQQLAKELN-KTDAQTFIDI  
SKLYWEE--YFMNLHLG---VRRYLNNE----KEGNLKAARNKDTM-----

-----  
-----  
>Hmel-ctg8  
-----

-----MSHVPSGNSLNNCLYALLYERPLFS  
FSENKL-KYRSIKESYSGKSIFL-----TGGTGFLGKVLIEKLLRST-D  
VEKIF----VLIREKKGIDSDKRLKQMLNIP--IFEDLKENK---PNAL-NKLVAIGGD  
VTKKDLGISPEDEQKIIDNVSLVFHSAATVKFTDPFSNIMNINYEGTKKVLKLSKKIKN-  
LE-----TFVYISTAFCQ--GD--RTHI-----NESMYPRFYEEGEVYKFIDAY  
G-DNPTEVV--KFLDGKPNTYTLSSKSLCESYIKEEHKP--LSTIVLRPSI-----  
-----VTPVY--KGPVPGWVD--SWVAATALFSDVARGLTKVVMYGDKNVI  
CDMIPVDYVINLAIVAGARG-----N-KTDD-----ILVFNSSSGTANPITWKEGAD  
LYL-EESLKYGK--SELK--PRKVMVLSSPLLMDFLSFTLQTTPAFLADLMLRIKGEQPK  
-----YLNMQKRAILLRDILRTFSSISFQIKSQKTEGLYTTLS-EEDKVQFPFDP  
KTIVWRK--YMRIFYKG--VQKYMLND----K-----  
-----

-----  
>Bmo\_swd2  
-----  
-----

-----GLIEKLLYSCVG  
IENIY----VLIREKEEESADQRLKKIIDS---VFDRVKKQD---INVL-NKIVTVPGN  
ISEKNLGLTTEHLKIIQEKVSVFHVAATVKFNEELSKAMAVNVNGTLEIISLCRRINK-  
LESDEHTAYLMALIQVSTAFSN--SD--RKHI-----EEIVYCINNVD FEGLKSLTDFW  
S---GDEDDVKRLLGKKPNTYTYTKALAEYVMKYGKD--LPIAIRPSI-----  
-----IISAI--KEPSQGWID--SWNGSTGTFGGMSSGVMKVMFGSGSNV  
ADLVPLDIVVNLIIVAATKC-----KRSS-----LKVYNCCTGTSPNITYSRAEV  
IIR-RATYKYSL--NQLPFPFMV-FTNSRLVYTLLRFILQIVPAFLIDLWSLFNGKKAI  
-----QMKIQHRITRTLDMKF FMIN EWHFEDSNTREL FENMS-EEDKNVFNFDL  
KSIDWDS--CIENYVVG---RRAYGPPDGEWLPSPMDFSNARGRAKPLPTAQAAAYLLIY  
RLGYISFVLTCR-----  
-----

>Ola\_pgFAR  
-----

-----MAANTIE  
TDEQFT-YNPIVNFYSGKSVFV-----TGATGFLGTVLVEKLLFSCKG  
INNIY----VLIKQTKDLTIEGRVLNYLNSK--AFHRVRNTN---PELM-KKIIPICGN  
LEHKNLGISDS DIKTLQEEVSIVFHVA AKLLFKMSLATAVNINTKPTEQLIVICKKMRR-  
NP-----IFIYVSSAYS N--VN--KQII-----DEKVYSNGVPLETIYDTLEAE  
N----TRLMDMFLDKRPNTYIYSKALAEVVGKEFDE--SAAAIVRPSI-----  
-----ILSSI--REPIPGWLT--GSHGFPQLVGAACRGFLLRWHGDGTVV  
FDVIPVDHVNLIIAAAWETNERRL-V-GNKG-----VKVYNCCSSLRNPIDVITVMN  
TCL-KYRK YFGTERTMSIFTPRYI-MKKNYFIYKLLYFTYHTIPAAIIDAFFWITGRTPM  
-----MLKTLNKLGLSSVLEYFTHHQFLFLDSNVRG LLRRMD-DTDRQTFNF DV  
TEIEWEM--YLQNFVRG---IANNYDSC-----  
-----  
-----

>Opa\_pgFAR

-----  
-----MSANTIE  
SDDQLINYNPPIVNFYSGKSVFV-----TGATGFLGTVLVEKLLFSCCKG  
INNIY-----VLIKQSKDLTIEGRILNYLNSK--AFHRVRNAN---PEFM-KKIIPICGN  
LEENNLGISDSMDKTLQAEVSIVFHVAACKLLFKMSLATAVNINTKPTEQLIAICKKMRR-  
NP-----IFIYVSSAYSN--VN--KQII-----DEKLYTTGVPLKTIYDTLETE  
N-----TRLIDIFLDKRPNTYIYSKALAEVVGKEFDE--SAAIVRPSI-----  
-----ILSSI--REPIPGWLT--GSHGFPQLVGAACRGLLLRWHGDGTVV  
FDIIPVDHVNLIIAAAWETNERKL-V-GNKG-----VKVYNCCSSLRNPIDVITVMN  
TCL-KYRKYFGTERTMSIFTPRYI-MKKNYFIYKLLYFTYHTIPAAIIDAFFWLTGRTPM  
-----MLKTLNKLNLSSVLKYFTHHQFLFLDSNVRGLLGRME-DIDRKTFNFDV  
TEIEWEM--YLQNFVRG---IASNYDSC-----  
-----

>Ofu\_pgFAR

-----  
-----MSANTME  
TDEQFT-YNPPIVNFYSGKSVFV-----TGATGFLGTVLVEKLLFSCCKG  
INNIY-----ILIKRTEDLTIEARILNYLNSK--AFHRVKNTN---PELM-KKIIPICGN  
LEDKNLGISDSMDKTLLEEVSIVFHVAACKLIFKMSLTAAVNINTKPTEQLIAICKKMRR-  
NP-----IFIYVSSAYSN--VN--EQII-----DEKVYSTGVPLETIYDTLDAK  
N-----TRLMDIFLDKRPNTYTYYSKALAEVVVEKEFDE---SAAIVRPSI-----  
-----IASSI--REPIPGWLS--GSHGFPRVVEAACKGLLLRWHGDGTVA  
FDVIPVDHVNLIIAAAWESNERRL-M-GNKG-----VKVYNCCSGLRNPIDVSTVMN  
TCL-KYRKYFGT-RTMSIITPRFI-MKKNYFLYKLLYFTYHTIPAAIIDGFFWLTGQTPM  
-----MLNTLHKLRLSSVLEYFTLHQFLFLDSNVRGLLRRME-STDRQTFNFDV  
TEIEWEP--YLQNFVRG---IANNYD-----  
-----

>OscZ\_pgFAR

-----  
-----MSANTME  
TDEQFT-DNSPIVNFYSGKSVFV-----TGATGFLGTVLVEKLLFSCCKG  
INNIY-----ILIKQTEDLTIEARILNYLNSK--AFHRVKNTN---PELM-KKIIPICGN  
LEDKNLGISDSMDKTLLEEVSIVFHVAACKLLFKMSLAAAVNINTKSTEQLIAICKKMRR-  
NP-----IFIYVSSAYSN--VN--KQII-----DEKVYSTGVPLETIYDTLDAK  
N-----TRLVDIFLDKRPNTYTYYSKALAEVLVEKEFDE---SAAIVRPSI-----  
-----IASSI--REPIPGWLS--GSHGFPRVVEAACKGLLLRWHGNGTVA  
FDIIPVDHVNLIIAAAWESNERRL-I-GNKG-----VKVYNCCSGLRNPIDVSTVMN  
TCL-KYRKYFGT-RTMSIITPRFI-MKKNYFLYKLLYFTYHTIPAAIIDGFFWLTGRTPM  
-----MLNTLHKLRLSSVLEYFTLRQFLFLDSNVRGLLRRME-GTDRQTFNFDV  
TEIEWEP--FLQNCVRG---IANNYD-----  
-----

>OnuZ\_pgFAR

-----MSANTME  
TDEQFT-YNPIVNFYSGKSVFV-----TGATGFLGTVLVEKLLFSCKG  
INNIY----ILIKQTEDLTIEARILNYLNSK--AFHRVKNTN---PELM-KKIIPICGN  
LEDKNLGISDSMDKTLLEEVSI VFHLAAKLLFKMSLAAAVNINTKSTEQLIAICKKMRR-  
NP-----IFIYVSSAYS N--VN--KQII-----DEKVYSTGVPLETIYDTLDAK  
N----TRLMDIFLDKRPNTYTYSKALAEVLVENE FDE---SAAIVRPSI-----  
-----IASSI--REPIPGWLS--GSHGFPRVVEAACKG LLLRWHGDGTVA  
FGIIPVDH VANLIIAAAWESNERRL-I-GNKG-----VKVYNCCSGLRNPIDVSTVMN  
TCL-KYRK YFGT-RTMSIITPRFI-MKKNYFLYKLLYFTYHTIPAAIIDGFFWLTGRTPM  
-----MLNTLHKLRKLSSVLEYFTLRQFLFLDSNVRG LLRRME-GTDRQTFNFDV  
TEIEWEP--FLQNCVRG---IANNYD-----

-----  
>Oze\_pgFAR

-----MAANTIE  
TDEQFT-DNSPIVNFYSGKSVFV-----TGATGFVGTVLVEKLLFSCKG  
INNIY----ILIKQTEDLTIEARILNYLNSK--PFHRVKNTN---PELL-KKIIPICGN  
LEDKNLGISDSMDKTLLEEVSI VFHVA AKLLFKMNLTA AVNINTKPTEQLIAICKKMRR-  
NP-----IFIYVSSAYS N--VN--EQII-----DEKVYSTRVPLETVYDTLDIE  
N----TRITDIFLDKRPNTYTYSKALAEVVVEKEFNE---SAAIVRPSI-----  
-----ILSSI--REPIPGWLS--GSHGFPRVVGAAACKG LLLRWHGDGTVV  
CDVIPVDH VANLSIAVAWESNERRL-M-GNKG-----VKVYNCCSSLRNPIDVSTVLN  
TCL-KYRK YFGT-RTMSIFTPRFI-MKKNYFLYKLLYFTYHTIPAAIIDGFFWLTGRTP I  
-----MLKTLDKLRKLSSVLEYFTHHQFLFLDSNVRG LLRRME-GTDRQTFNFDV  
TEIEWEP--YLQNFVRG---IANNYDNS---M-----

-----  
>OscE\_pgFAR

-----MSANTME  
TDEQFT-YNPIVNFYSGKSVFV-----TGATGFLGTVLVEKLLFSCKG  
INNIY----ILIKQTEDLTIEARILNYLNSK--AFHRVKNTN---PELM-KKIIPICGN  
LEDKNLGISDSMDKTLLEEVSI VFHVA AKLLFKMSLTAAVNINTKPTEQLIAICKKMRR-  
NP-----IFIYVSSAYS N--VN--EQII-----DEKVYNTGVPLETIYDTLDTE  
N----TRITDIFLDKRPNTYTYSKALAEVVVEKEFDE---SAAIVRPSI-----  
-----IVSSI--REPIPGWLS--GSHGFPRVVGAAACKG LLLRWHGDGTVV  
CDLIPVDH VANLIIAAAWESNERRL-M-GNKG-----VKVYNCCSSLRNPIDVITVVK  
TCI-KYRK YFGT-RTMSIFTPRFI-MKKNYFIYKLLYFTCHTIPAAIIDGFFWLTGRTP I  
-----MLKTLDKLSKISSVLEYFTHHQFIFLDSNVRG LLRRME-GTDRQTFNFDV  
TEIEWEP--YLQNFVRG---IANNYDYS---M-----

-----  
>OnuE\_pgFAR

-----MSANTME  
TDEQFT-YNPIVNFYSGKSVFV-----TGATGFLGTVLVEKLLFSCKG



INNIY-----ILIKQTEDLTIEARILNYLNSK--AFHRVKNTN---PELM-KKIIPICGN  
LEDKNLGISDSMDKTLLEEVSI VFHVA AKLLFKMSLTAAVNINTKPTEQLIAICKKMRR-  
NP-----IFIYVSSAYS N--VN--EQII-----DEKVYNTGVPLETIYDTLDTE  
N----TRITDIFLDKRPNTY TYSKALAEVVVEKEFDE---SAAIVRPSI-----  
-----IVSSI--REPIPGWLS--GSHGFPRVVGAACKG LLLRWHGDGTVV  
CDLIPVDH VANLIIAAAWESNERRL-M-GNKG-----VKVYNCCSSLRNPIDVITVVK  
TCI-KYRK YFGT-RTMSIFTPRFI-MKKNYFIYKLLYFTYHTIPAAIIDGFFWLTGRTP I  
-----MLKTLDKLGKISSVLEYFTHHQFIFLDSNVRG LLRRME-GTDRQTFNFDV  
TEIEWEP--YLQNFVRG---IANNYDYS---M-----  
-----  
-----

>Oza\_pgFAR

-----MSANTVE  
TDEQFTDNNSPIVNFYSGKSVFV-----TGATGFLGTVLVEKLLFSCKG  
INNIY-----ILIKQTEDLTIEARILNYLNSK--AFHRVKNTN---PELM-KKIIPICGN  
LEDKNLGISDSMDKTLLEEVSI FHLAAKLLFKMSLTAAVNINTKPTEQLIAICKKMRR-  
NP-----IFIYVSSAYS N--VN--KQII-----DEKVYSTGVPLETIYDTLNTE  
N----TRITDILLDKRPNTY TYSKALAEVVVEKEFDE---SAAIVRPSI-----  
-----IVSSI--REPIPGWMS--GSHGFPRVVGAACEG LLLRWHGDSTVV  
FDVIPVDH VANLIIAAAWESNERRL-M-GNKG-----VKVYNCCSGLRNPIDVSTIMN  
TCL-KYRK YFGT-RTLSIFTPRFI-VKKNYFIYKLLYFTYHTIPAAIVDGFFWLTRRTPM  
-----MLNTLHKLSKLSSVLEYFTLHQFLFLDSNVRG LLRRME-STD RQTFNFDV  
TEIEWEP--YLQNCVRG---IANNCDYS---M-----  
-----  
-----

>Onr.za\_pgFAR

-----MSANTVE  
TDEQFTDNNSPIVNFYSGKSVFV-----TGATGFLGTVLVEKLLFSCKG  
INNIY-----ILIKQTEDLTIETRILNYLNSK--AFHRVKNTN---PELM-KKIIPICGN  
LEDKNLGISDSMDKTLLEEVSI FHLAAKLLFKMSLTAAVNINTKPTEQLIAICKKMRR-  
NP-----IFIYVSSAYS N--VN--KQII-----DEKVYSTGVPLETIYDTLDTE  
N----TRITDILLDKRPNTY TYSKALAEVVVEKEFDE---SAAIVRPSI-----  
-----IVSSI--REPIPGWMS--GSHGFPRVVGAACKG LLLRWHGDSTVV  
FDVIPVDH VANLIIAAAWESNERRL-M-GNKG-----VKVYNCCSGLRNPIDVSTIMN  
TCL-KYRK YFGT-RTLSIFPRFI-VKKNYFIYKLLYFTYHTIPAAIVDGFFWLTRRTPM  
-----MLNTLHKLSKLSSVLEYFTLHQFLFLDSNVRG LLRRME-STD RQTFNFDV  
TEIEWEP--YLQNCVRG---IANNCDYS---M-----  
-----  
-----

>Dpl-ctg8

-----MVKCNRRLLFN RNKSFYNAYS NM RSPSHCVT  
EDDLNK-KTSSIVDFYNGKSIFI-----TGGTGFLGKMYIRN ILHRCPG  
ICKIY----MLIRPTSKNSVESRLED MIKNSMNLFEGLN-----ENHF-MKLVPIEGD  
VTAPNLGIHPDKRLLQE QVSIIVHSAATLDINATLREAYHVN VIGTENLLAVAKDMKK-

LH-----AFLHLSTFYCCMTNE--KNAI-----EEKVYSPPLYVKDVPKTLEKY  
G---HMRFPQSLKKNKQNTYIFTKAISEYLVSSTHGD--IPTAIRPSL-----  
-----IGCSN--KDPYKGWID--VFNIHSFILTAISNGFLRILNINKNTV  
WDFIPVDYVANLMILAATKC-----K-KSTQ-----VDIYNCASSGINPVTILSACS  
IFISDFVT-----NKKSSKKIRLLNPFVHLIPAFINDVRYILTGRKAN  
-----IKKLLKIKDQIKFFGGHWSKAKSDHVTSLINSLS-DEDRKKFPCDP  
SDIDWVE--YFREYSKG---IRNYLSKN-----  
-----  
-----
