# Supplementary material for: Mosaic Evolution of Molecular Pathways for Sex Pheromone Communication in a Butterfly
Source: MDPI journal article supplement (doi:10.3390/genes13081372), 2022-07-31
Supplement: s1 [file s1]

## Supplementary File 2: Phylogenetic reconstruction of odorant binding proteins

We used the alignment of the OBP gene family published by [59] (their Supplementary File 5), which is based on the OBP gene sequences found in the fly *Drosophila melanogaster*, a number of moth species, and the butterfly species *Danaus plexippus* and *Heliconius melpomene*. We completed [59] OBP amino acid fasta file with:

- i) our 47 Bany\_OBP contigs, and with the OBP sequences we found in the butterflies
- ii) *Papilio polytes* and
- iii) *Melitaea cinxia*.

To do so, we mined the genome of *P. polytes* (website <http://papilio.bio.titech.ac.jp/>, accessed on May 23 2015) and *M. cinxia* (website: [http://metazoa.ensembl.org/Melitaea\\_cinxia/Info/Index](http://metazoa.ensembl.org/Melitaea_cinxia/Info/Index), accessed on May 23 2015) using the keywords “odorant binding protein” and found 9 annotated Ppol\_OBP and Mcin\_OBP genes.

We aligned the additional butterfly OBP sequences using Mafft V7 (website: <http://mafft.cbrc.jp/alignment/server/>) using G-INS-i reconstruction method (which gave the same OBP tree as in Vogt et al 2015 when only their OBP sequences were used), leave gappy regions, gap opening penalty of 3.0 and offset value of 1.0.

We failed to improve the alignments, on which the quality of the phylogenetic reconstructions depend, using the tools *Prank* (website: <http://www.ebi.ac.uk/goldman-srv/cgi-bin/>), *Gblocks* (website: <http://molevol.cmima.csic.es/>) or *Guidance* (website: <http://guidance.tau.ac.il/>). Hence, the alignments were manually curated to remove highly divergent regions and we excluded the OBP sequences (DpleOBP22, Bany-CN33, Bany-cn15 and MsexOBP26) because they produced huge gaps in the alignments. Given that large portions of the OBP amino acid matrix still showed gaps in alignments between OBP sequences from different species, we next used *Phyutility* to cutoff amino acid sites without enough information [94]. After removing sites where either 30% or 50% or more of the sequences provided no information, 165 and 147 amino acid characters, respectively, remained in our dataset. Having 147 or 165 amino acid positions to sort the relationships between 383 OBP sequences is not statistically sound. We, therefore, removed all OBP sequences from *Drosophila melanogaster* and several moth species present in [59]’s original OBP dataset. The final dataset used for our phylogenetic reconstructions contained 281 OBP sequences listed in the table below:

| Species              | Number of OBP ORF | Origin of OBP amino acid sequences |
|----------------------|-------------------|------------------------------------|
| <i>Manduca sexta</i> | 49                | [59] Suppl file 5                  |
| <i>Bombyx mori</i>   | 44                | [59] Suppl file 5                  |

|                             |    |                                                                                                                     |
|-----------------------------|----|---------------------------------------------------------------------------------------------------------------------|
| <i>Other moths</i>          | 27 | [59] Suppl file 5                                                                                                   |
| <i>Bicyclus anynana</i>     | 47 | This ms                                                                                                             |
| <i>Heliconius melpomene</i> | 51 | [59] Suppl file 5                                                                                                   |
| <i>Danaus plexippus</i>     | 32 | [59] Suppl file 5                                                                                                   |
| <i>Melitea cinxia</i>       | 32 | <a href="http://metazoa.ensembl.org/Melitaea_cinxia/Search/">http://metazoa.ensembl.org/Melitaea_cinxia/Search/</a> |
| <i>Papilio polytes</i>      | 9  | <a href="http://papilio.bio.titech.ac.jp/">http://papilio.bio.titech.ac.jp/</a>                                     |

We ran Phyutility again on this final aligned amino acid dataset of 281 OBP sequences, for a cutoff of 10%, leaving 229 amino acid sites in the dataset. The fasta file is available below.

Phylogenetic reconstructions were carried using maximum likelihood using the “LG+I+G” substitution model and 100 BT. Rate heterogeneity was set at four categories, and the gamma distribution parameter and the proportion of invariable sites were estimated from the data set. Tree reconstruction was performed using PhyML 3.0 [56], with both SPR (Subtree Pruning and Regrafting) and NNI (Nearest Neighbour Interchange) methods for tree topology improvement. Images were created using Evolview (website: <http://www.evolgenius.info/evolview/>).

94. Smith, S.A.; Dunn, C.W. Phyutility: A Phyloinformatics Tool for Trees, Alignments and Molecular Data. *Bioinformatics* **2008**, *24*, 715–716, doi:10.1093/bioinformatics/btm619.

Fasta OBP aligned amino acid sequences used for phylogenetic reconstructions:

>Msex-GOBP1\_MsexOBP5\_Msex207430\_M73797\_

-----

-----

-----

-----  
-----MGQN-----  
-----TR--SLV--LV-----VL  
VGLVGA-V-----S--ADVQ-----VMKD-VTLGFGQ  
ALEQCREES-----QLTE-E-----KM----E-EF-FHFWRED--F  
--KFE-----HR-ELGCALQCMSRH--FNLL-----  
-TD---S--S-R-----MHHENTDKFIKSFPNG----A-VLSKT--MVE-LIHNC-  
----ELQ-----HDA---EE-D-----H---CWRILRVA-ECFKISCT  
K---A-----  
-----  
-----GIA----PSMEVMM  
AEFIMETEN-----  
-----  
-----  
-----  
-----  
-----  
-----  
-----  
-K-----  
-----  
-----  
>Msex-GOBP2\_MsexOBP6\_Msex205759\_M73798\_AF323972\_  
-----  
-----  
-----  
-----



V-V-AI-VV

YLA VGN-V-D-SSPD-VMKN-LCLNFGK

ALDECKAEM-NLSD-S-IK--D-DF-ANFWVEG-Y

--EVS---NR-DTGCAILCLS KK--LD MI-----

-DP--D-G-K-----LHH GNAMEFAKKHGAD---E-AMAKQ--LLD-IVHNC-

----ENS-----TPP---ND-D-----A--CLKT LDIA-KCFKKEIH

K---L-----

NWA-PNM DLVV

GEVLAE-----

V-----

Msex-PBP-B\_PBP4\_MsexOB P4\_Msex205762\_

MKEA-----

GVR-FKI-LL-----FL

IFPVVTGN-----F--KGKQ-----IMRS-VAETFGR

TVFECQNEV-----LMKFGS-----GI---LNDI-FRYWHEG--O

```
--PLE-----DR-DLGCFRCILLK--LELV-----
```

-ND---N--G-R-----LIDANADGFFQANGAD----E-SMTKH--LIE-LYHSC-

-----YQT-----MRF----PQDD-----CMLILEIG-KCCREGVR

N---A-----

---

-----HWT-----PGSK-----

-----

---

>Msex-PBP-C PBP3 MsexOBP3 Msex205760-RE AF117580

-----

-----

---

-----MA-VIP--IF-----

-----T--V---LL-----MM

T-AVKE-I-----A---PSSD-----AMRH-ANGFLK

VLDQCKHEL-----GLTD-Q-----IV---V-DL-YQFWKLQ--Y  
--ALL-----NR-DTGCAIICMSKK--LDLL-----  
-DG---T--G-R-----MHHGNTQEFAVSHGAT---D-EVASK--VVV-IIRDC-  
----EKQ-----QEG---EQ-D-----D---CVRVLEVA-KCFRTAIH  
E---L-----  
-----  
-----NWA---PNMEVVV  
DELLTE-----  
-----  
-----I-----  
-----  
-----  
-----  
-----  
-----  
-----  
-----  
-----  
  
>Msex-PBP-D\_PBP2\_MsexOBP2\_Msex205763\_AF117588\_  
-----  
-----  
-----  
-----  
-----  
  
-----MV-STKW---CF-----  
-----L-L---VT-----IA  
VLTMEV-V-----S---ASQE-----VLKQ-MSVGFSK  
VLQTCKTEL-----SVGD-H-----II---Q-DF-YNYWRED--Y

[illegible]



-DK---N--G-L-----FDVEATKEKSKKYISS-----EKDVTN--FDK-IIKDC-

-----TEV-----NQK---NVSD-----GNKGCDRAKELV-TCFLAKRG

D---F-----

-----

-----SVF---TF-----

-----

-----

-----

-----

-----

-----

-----

-----

-----

>Msex-ABP2\_Msex200465\_AF393491\_note:samegenelocusasOBP12\_

-----

-----

-----

-----

-----M-----DRKD-----

-----LCL--LII-----AF

IL---AD-----G---VDSM-----SKQQ-LKNSGKM

FKKQCMGKN-----KVTE-D-----EI---GEID-KGRF-----

---VE-----QQ-NVMCYIACIYQM--SQVV-----

-KN-----N-K-----LNYEASLKQIDIMYPP-----ELKDT--AKG-ALEAC-

-----KDI-----AKK---NKDL-----CEASFKTA-KCMYEYSP

K---D-----

-----

-----FLFP-----

-----

-----

-----

-----

-----

-----

-----

-----

-----

>Msex-ABP3\_Msex209425\_AF393488\_

-----

-----

-----

-----

-----MQKQRGAMITA-----

-----TLH--VVF-----A-L

LGFVYGAK-----NKPV-----FSEE-IKEIIQT

VHDECVGKT-----GVSE-E-----DI---ANCE-NGIF-----

---KE-----DV-KLKCYMFCLLEV--AGLA-----

-DE---D--G-T-----VDYDMLVSLIPE-----EYSER--ASK-MIFAC-

-----NHL-----DTP---EKDK-----CQRSFDVH-KCTYEKDP

E---F-----

-----

-----YFLF-----

-----

-----

-----

-----

-----

-----

-----

-----

-----

>Msex-ABP4\_Msex200467\_AF393490\_

-----

-----

-----

-----

-----M-----FRYI-----

-----FCA--ICL-----IL

IL---FD-----A---SYAM-----SRQQ-LKNSGKM

MKKSCIPKN-----DVTE-D-----EV---GQIE-QGKF-----

---IE-----DR-RVMCYIACIYTM--TQVV-----

-KN-----N-K-----LSYDAIVKQVDMMFPP-----EMRTA--VKT-AAENC-

----KDI-----AKK---YKDI-----CEASYWTA-KCMYDFDS

K---N-----

-----  
-----FVFP-----

-----  
-----  
-----  
-----  
-----  
-----  
-----  
-----  
-----  
-----  
-----

>Msex-ABP5\_Msex207487\_AF393498\_

-----  
-----  
-----  
-----

-----MCKPMYYVVFSI-----

-----IYL--SIVLAQK-----AD

NGNTKIAN-----V---QRND-----QGSM-DDVDVED

IMNQCNETF-----RIEM-A-----YL----Q-AL-NESGSFP---

---VE-----TDRTPKCFLLCVLDN--TGVM-----

-TK---D--G-D-----FDPERTAALFAGERAG-----KVMDG--IQD-MAAAC-

----ADR-----KEK-----C-----K---CEKSYNYL-KCLMTMEI

E---K-----

-----

-----YAN---NN-----

-----

-----

-----

-----

-----

-----

-----

-----

-----

>Msex-ABPX\_Msex202108\_AF117577\_

-----

-----

-----

-----

-----MISS-----

-----LVH--VLT-----

---LLAA-----GVLA-----LDEE-QAELARM

VRENCVDEI-----GVDE-G-----LL----AKVD-DGADL-----

---MP-----DP-KLKCYLKCTMEM--AGMI-----

-SD-----G-V-----VDVEAVLGLLPD-----DVKLR--TTD-IVRAC-

----DTQ-----KGA-----DD-----CDTAFLTQ-TCWQQANR

A---D-----

-----

-----YIFI-----

-----  
-----  
-----  
-----  
-----  
-----  
-----  
-----  
-----

>Msex-OBP8\_Msex213843\_

-----  
-----  
-----  
-----

-----MCKPMYCVVFSI-----

-----IYL--SIVAAQK-----AD

NGNTKIAN-----L---QSND-----QDSM-DNVDVED

IMNQCNETF-----RIEM-A-----YL----Q-AL-NESGSFP---

---DE-----TDRTPKCFLLCVLDN--TGVM-----

-MK---D--G-D-----FDPERTAVLFAGERAG-----KVMDG--IQD-MAAAC-

----ADR-----KEK-----C-----K--CEKSYNYL-KCLMTMEI

E---K-----

-----

-----YAN---NN-----

-----

-----  
-----  
-----  
-----  
-----  
-----  
-----  
-----

>Msex-OBP9\_Msex200460\_

-----  
-----  
-----  
-----  
-----  
-----  
-----  
-----MYVL-----

-----KFF--ACI-----V

LIGCIKAK-----TLDD-LKNNYSE

MIVKCTSKY-----PITD-E-----DL---ELLK-TGDM-----

---GD-----KE-STKCLFACVYKK--TGMM-----

-DD---K--G-M-----LDVDQTNKIVQTYFSD---NSEELKK--GLA-YTEAC-

----KSV-----NDA---PVTD-----GDRGCDRAALLF-KCTTENLP

ALGGL-----

-----

-----AVK---YCFFLEL

NDETIMPLA-----

-----

-----  
-----  
-----  
-----  
-----  
-----  
-----

>Msex-OBP10\_Msex200461\_Mad10HM167934\_

-----  
-----  
-----  
-----

-----MIRA-----

-----VVF--CCC-----MV

ALMPFSAN-----A--MTDE-----QKEK-IHEHF EK

LGLGCLKEN-----TITE-D-----DI---KDLR-AKKV-----

--PS-----GE-NAGCFLACMMKE--IGVL-----

-ND---E--G-M-----LEKGRAMELAKEVFDD-----AEELKK--IEE-YMHSC-

-----SSV-----NSE---SVGD-----GEKGCERAMLAY-KCMVENAS

K---F-----

-----

-----GFD---IVTNILH

SKLILSYLNINLHSS-----

-----

-----



-----  
-----  
-----  
-----  
-----  
-----

>Msex-OBP11\_Msex200464\_

-----  
-----  
-----  
-----

-----MWKI-----

-----SYF--LFV-----FGV

AANLKHAY-----A---VTEE-----ERLM-LDSLMPK

KVLACVEEF-----GLKD-F-----SI---EDIR-KDHE-----

-----IDPCLLQCFLKK--AEVF-----

-VD-----G-M-----INLEKADETLREVIND-----EDEVEQ--IME-KGKEC-

---ADEA-----NGS---DVSG-----DDEDCARVAIFH-SCLREKNG

L---F-----

-----

-----MAT---S-----

-----  
-----  
-----  
-----

-----  
-----  
-----  
-----  
-----

>Msex-OBP12\_Msex200465\_note:samegenelocusasABP2\_

-----  
-----  
-----  
-----

-----MPKHD-----

-----VTE--DQVGGIEQGKFLENRNV

CYIACVYS-----M---SQAM-----SKQQ-LKNSGKM

FKKQCMGKN-----KVTE-D-----EI---GEID-KGRF-----

---VE-----QQ-NVMCYIACIYQM--SQVV-----

-KN-----N-K-----LNYEASLKQIDIMYPP-----ELKDT--AKG-ALEAC-

----KDI-----AKK---NKDL-----CEASFKTA-KCMYEYSP

K---D-----

-----

-----FLFP-----

-----  
-----  
-----  
-----  
-----

-----  
-----  
-----  
-----

>Msex-OBP13\_Msex200468\_

-----  
-----  
-----  
-----  
-----

-----M--LFL-----VV

AKFFILLS-----L--GEAM-----TMKQ-IRNTGKM

MRKQCQPKN-----NVED-E-----KI---DPLG-KGVF-----

---IN-----EK-EVKCYMACIMKM--ANTI-----

-KN-----G-K-----INYEAMKQADLLLPE-----DIKEP--AKE-ALTSC-

----RKV-----ADS---HKDV-----CDAAFYIS-KCIYEYNP

D---I-----

-----

-----FYF-----

-----

-----

-----

-----

-----

-----

-----

-----

-----

>Msex-OBP14\_Msex200463\_

-----

-----

-----

-----

-----

-----

-----G---ITEK-----QRLH-IREELIE

IGTECHKN-----PITI-G-----DV---RSFR-NKQF-----

---PN-----GP-NAGCFIACVFNK--AGIMLGLEINNFTVQTQDALLRAYLIKQEL

FDD---E--G-L-----VSQKTATEKATKVFDD-----ETELKN--YEQ-FIAVC-

----DKV-----NEE---SVSD-----GQKGCERAKLAF-QCLIQNSK

Q---V-----

-----

-----FIP---YNLLLS

R-----

-----

-----

-----

-----

-----

-----

-----

-----

>Msex-OBP15\_Msex201454\_

-----

-----

-----

-----

-----MRRK-----

-----LLN-----

-----I--KENP-----FTSV-VRKALIN

TARSCMVHV-----NATQ-E-----DL---E-YL-RKDP-----

---PF-----PE-KASCIVKCLEK--IGVV-----

-KN-----N-K-----YSKSGFMMVVTPLVFA---NKKKLDH--MKT-VSENC-

----ESE-----IVH---KESS-----P---CDAGNEVT-TCIFKYAP

E--L-----

-----

-----HLR---G-----

-----

-----

-----

-----

-----

-----

-----

-----

-----

>Msex-OBP23\_Msex203518\_

-----

-----

-----

-----

-----

-----

-----MYA-HDKLSDM

VAEQCLNEM-----YPKS-----KRIE---I-----

-----QESDEPCIIFCVLKK--FGIM-----

-ST---N--G-V-----INLEVFRKRVQNSHQH-----EQRNT--MND-IGSNC-

----LES-----AEA-TQHKQDV-----CKKAKVFN-DCTHLYRI

L---L-----

-----

-----K-----

-----

-----

-----

-----

-----

-----

-----

-----

-----

>Msex-OBP24\_Msex203519\_

-----  
-----  
-----  
-----  
-----MLVLKFLLC-----  
-----ALT--SAL--AM-----KQ  
HAPSGTMV-----D---FTDA-----KVQG-HLDALVR  
MAQSCVIKV-----RATP-K-----DV---RAYF-TNSS-----  
---PV-----SR-SGQCFAACMLEQ--SDVV-----  
-NH-----G-K-----INRELLVHLASLVNGK---NSRVVRK--LNS-VSRLC-  
----LDS-----IDG---MSDR-----CQLASTYN-DCLNENMI  
E---F-----  
-----  
-----AFP---LDIAEEA  
VRKMPFHLIQPKNLPQEMRPANY-----  
-----  
-----  
-----  
-----  
-----  
-----  
-----  
-----  
-----

>Msex-OBP27\_Msex208382\_

-----

-----

-----

-----

-----MKRAKRRQPRQETNMFKIDF-----

-----QSL--MLF--LIFGA AFILVIAF

QPLSKEEH-----I--ERYN-----KMSE-DVEPFRK

NLTECARQV-----KASM-V-----DV---EHFL-KRIP-----

---QS-----TM-QGKCFVACILKR--NNII-----

- TK-----N-K-----VNVKNLLEANRAVYGD---DSEVLAR--LKT-AVKEC-

-----SEV-----VEG---VFEI-----CEYASVFN-DCMHMKME

H---L-----

-----

-----LDR---MTMERRM

EALGQMTSNPDEWSDDDEMLKLVKDEL-----

-----

-----

-----

-----

-----

-----

-----

-----

>Msex-OBP29\_Msex211541\_

-----



-----  
-----  
-----  
-----MMGVDAIHDPQTKIDKDTIITRNL-----  
-----KLE--KKG--QAKTSVQNRKKDI  
EREPDWSY-----Q---PIPP-----EVST-HVEQFKK  
NMTECLKEV-----QAND-K-----RP----VKRL-SPKT-----  
---ES-----PI-HGECLACVLKR--NGVI-----  
-DN-----G-K-----INKNNLLTLVSKFYAK---DTKLMKK--LDK-NLEHC-  
----IEI-----STR---NRDE-----CVLASQLN-ACTNDLMA  
S---N-----

-----  
-----KHK----IIVNY--

-----  
>Msex-OBP\_Y\_Msex200466\_  
-----  
-----

-----

-----

-----

-----

-----

----MPKH-----DVTE-D-----QV---GGIE-QGKF-----

---LE-----NR-NVMCYIACVYSM--SQAV-----

-KN-----N-K-----IMYDNMIKQVDMMFPP-----DIKDA--VKD-SIENC-

----RPV-----AKK---YKDV-----CEAAFWTA-KCMYDYNP

A---N-----

-----

-----FVFP-----

-----

-----

-----

-----

-----

-----

-----

-----

-----

>Msex-ABP6\_Msex203889\_AF393499\_

-----

-----

-----

-----  
-----MKVTNGL-----  
-----FLV--FLV--SV-----L  
ACGIAASP-----K--KIYR-----IPPQ-SSEKIVE  
EVLKCVQKM-----GLES-T-----VV---NLLK-EGKY-----  
---TE-----DD-RVIETLMCSNQN--LGNV-----  
-NG---D--G-K-----VNIDKVMNEIF-----SNKPE--IRS-ALVAC-  
----EKD-----GGK-----SS-----LETFKNX-----

-----  
-----  
-----  
-----  
-----  
-----  
-----  
-----  
-----  
-----  
-----  
-----  
-----

-----  
>Msex-ABP7\_Msex203892\_AF393500\_

-----  
-----  
-----  
-----

-----MKAL-----

-----LVL--AAC---LV-----  
-----LAQA-----LTDE-QKEKLKK  
HKSECLSET-----KVEE-Q-----LV---NKLK-AGDYK-----  
--AE-----ND-NLK KYALCMMM K--SELM-----  
-TK---E--G-K-----FKKDVALSKVPNP-----ADKPM--VEK-LIDTC-  
----LAN-----KGN-----TP-----HQTAWNYV-KCYHEKDP  
K---H-----

-----  
-----AIF---L-----  
-----  
-----  
-----  
-----  
-----  
-----  
-----  
-----  
-----  
-----  
-----  
-----

>Msex-OBP7\_Msex203888\_

-----  
-----  
-----  
-----  
-----MYFK-----  
-----ILV--LCG--IL-----A

IKNGICDE-----R---RAVS-----FVPE-VADHITK  
TIKYCMVKH-----DNDP-K-----II---ELVR-QGSY-----  
---GV-----DE-PFKKFIHCAYYK--SGYA-----  
-NE---D--G-H-----VLVNKVIKAFPK-----DAN---IEE-VTKKC-  
----STI-----KGE-----DA-----EDTTYQFF-KCFELNAP

I---R-----

-----

-----LAL---E-----

-----

-----

-----

-----

-----

-----

-----

-----

-----

>Msex-OBP16\_Msex201707\_

-----

-----

-----

-----

-----METF-----

-----QFA--VFC-----V

AFYTFVVS-----S---PIKE-----FYPKRDVATLKK

---SE-----QP-SLKNWVLCILNK--MGLM-----

-----LST-----TAL-----PA-----PDIWKYV-HCLHVNDP

-----

-----

-----

-----

---

-----

---

-----

---

-----

-----

-----

-----

-----

-----LFL--TLL-----

NIAACIKES-----GVKP-E-----IL---AEAK-KGNY-----

---SE-----DE-AMKKFLLCFFNK--SGIM-----

-NA---D--G-K-----LNLDVALANLPPG-----VDKNE--ATK-ALEEC-

----QHK-----NGK-----DA-----PDTAFTIF-KCYRAATK

T--Q-----

-----

-----VLF-----

-----

-----

-----

-----

-----

-----

-----

-----

-----

-----

>Msex-OBP18\_Msex202300\_

-----

-----

-----

-----

-----

-----

-----

-----

-----

-----

-----

-----

-----

-----

-NGYRSSH-----Q---SPRR-----YKRE-RRVDNTG

QRSQYNPNT-----QRNSGY-----ED---TYRN-EEKNSSE---

--NNT-----NTDNKACALQCFLN--LQMT-----



-AQ---D--G-M-----PDKYLVTHAITKNVKN-----DDLQDF--LQE-SIDEC-

----FQI-----LEN---EDSDD-----K---CEFSKNLL-LCLSEKGK

A-----

-----

-----NCD---DWKDDMH

F-----

-----

-----

-----

-----

-----

-----

-----

-----

>Msex-OBP21\_Msex202698\_

-----

-----

-----

-----

-----MIKQ-----

-----MCA--FLF-----ALSVI

CSVNLAAS-----K---SIYV-----FPPE-KAEMILE

NAIKCITES-----GLQT-F-----VG---QEIK-QGKY-----

---TD-----DE-RTL GALVCANEK--IGYS-----

-NE---S--G-R-----LNIDKIMIDLF-----PLKPE--IRS-DLEAC-

----NKD-----YGL-----DP-----VGTFKSFL-ICFRKRVP

F--R-----

-----

-----VVL-----

-----

-----

-----

-----

-----

-----

-----

-----

-----

>Msex-OBP22\_Msex203248\_

-----

-----

-----

-----

-----MSWL-----

-----HAV--VAL---AL-----AAS

AAPATTSC-----K--NCIA-----LGKE-EKAMFRA

HSDACLPQS-----GVEP-K-----VV---ESML-NGQL-----

---VE-----SA-ALRRHVYCVLMK--CKLV-----

-SK---E--G-K-----LMKNAMLGKMAMR-----SDGKN--ATK-VLEGC-

----ADQ-----TGD-----TP-----EDLAWNLF-RCGYDKKT

M--L-----

-----

-----FDYMPTSGASSGDI

DNISK-----

-----

-----

-----

-----

-----

-----

-----

-----

>Msex-OBP30\_Msex213730\_

-----

-----

-----

-----

--MYINMDFRVKLVTRCLTLKRHSYCKMKIT-----

-----ASL--VFV--LL-----N

VVSIYGES-----K--EIYF-----FPKE-AAVTFLE

ATLKCIADS-----NYDS-S-----VI---DQIM-QGKY-----

---IE-----DD-KTVNALICACVA--TGFG-----

-YP---D--G-K-----VNVEKIMKESV-----PTRQD--LRP-FIEDC-

----NRE-----SGK-----TP-----AQTFRGIV-KCYREKLP

V---Q-----

-----  
-----LRFSN-----

-----  
-----  
-----  
-----  
-----  
-----  
-----  
-----  
-----  
-----  
-----

>Msex-OBP31\_Msex214143\_

-----  
-----  
-----  
-----

-----MQEV-----

-----EYA--DERRNVT-----DI

LKETDVPN-----S---TSFN-----DEGF-TTRNLED

AALDSTKIQ-----IIRK-Y-----ND---TDTI-SRRKKRS--E

PLFDK-----PD-TNQCLSQCVFAN--LQVV-----

-DS---R--G-I-----PRETELWNLVQSAVTS-----QQSRAA--LRD-QIRAC-

----FQE-----LQS---EAEDN-----G---CSYSNKLE-RCLMLRFA

D---R-----

-----

-----KMD---EGNANEK

KADQ-----

-----

-----

-----

-----

-----

-----

-----

-----

>Msex-OBP32\_Msex203893\_

-----

-----

-----

-----

-----MLCMHHCKLTIFVTTINMQSY-----

-----LFL--TLV-----

-LAVVGIN-----A---DIVL-----LTDV-QKEQSNA

NIAACIKES-----GVKP-E-----IL---AEAK-KGNY-----

---SE-----DE-AMKEFLLCFFNK--TGIM-----

-NA---D--G-K-----LNLDVALANLPPG-----VDKNE--ATK-ALEEC-

----QHK-----NGK-----DA-----ADTAFTIF-KCYSAATK

T---Q-----

-----

-----VLF-----

-----  
-----  
-----  
-----  
-----  
-----  
-----  
-----  
-----

>Msex-OBP33\_Msex203891\_

-----  
-----  
-----  
-----

-----MKAA-----

-----QNL--FGI--IL-----FSVF

AAVIAAST-----K--KIFH-----LSPE-SGEKLVE

GIIKCIAKL-----NFDP-S-----LI---NLIK-EGKY-----

---LE-----DE-RLIKAIICMNVD--SGVG-----

-TA---D--G-R-----LNVDVAVMERIF-----SNNAE--IRK-GLICC-

----EKE-----YDG-----TP-----VGNLRGTL-TCLKETLP

F--K-----

-----

-----IRM-----

-----

-----  
-----  
-----  
-----  
-----  
-----  
-----  
-----

>Msex-OBP35\_Msex214323\_

-----  
-----  
-----  
-----

-----MRTA-----

-----IFL--LLV-----SV

ISCYAAEE-----K--DTYY-----YPKA-PSEIFLN

AAKKCVEDL-----SYNS-S-----IM---DQIM-QGKY-----

---IE-----ED-KTLNVLICA AVN--TGYG-----

-NA---D--G-K-----LNVEKVVKELY-----PERQD--VWP-IIIEKC-

----NLE-----QVT----STP-----LETFKGIV-VCLKNNLP

F--K-----

-----

-----IRFPM-----

-----

-----

-----  
-----  
-----  
-----  
-----  
-----  
-----

>Msex-OBP36\_Msex214586\_

-----  
-----  
-----  
-----

-----MKVT-----

-----ILV--ILI-----IG

VSCDAAFT-----K--PIYR-----FPPK-QSEMYVE

AVVKCVAKL-----GYDL-A-----IL---DQIR-QGKY-----

---TD-----DD-KSVEALVCANND--IGYG-----

-LP---N--G-Q-----LDADKTIQDLF-----PTKPE--IKS-VFDKC-

----DKD-----YGV-----DP-----AGNFKAFL-LCFKDEIP

F--K-----

-----

-----VII-----

-----

-----

-----



-----  
-----  
-----  
-----  
-----  
-----

>Msex-OBP40\_Msex214420\_

-----  
-----  
-----  
-----

-----MRAA-----

-----IFL--LLV-----SV

ISCYAAEE-----K---DTYY-----YPKA-PSEIFLN

AAKKCVEDL-----GYTS-S-----IM---DQIM-QGKY-----

--IE-----ED-KTLNVLICA AVN--TGYG-----

-NA---D--G-K-----LNVEKVVKELY-----PEKQD--VWP-IIIEKC-

----NLD-----QKT----STP-----SETFKGIV-VCLKTNLP

F---I-----

-----

-----IRFPM-----

-----  
-----  
-----  
-----

-----  
-----  
-----  
-----  
-----

>Msex-OBP19\_Msex202657\_

-----  
-----  
-----  
-----

-----MKLRTKWNGIYTS-----

-----SLK--IVF--IKYVPAKLPSLHL

MVISSQGP-----P---PFLKDIP-----EKCR-GPPPVE

KPHECCKVE-----PFFEAS-----DF----TECG-YKNSNED---

-VGFK-----RGPPDCSKQLCLMKK--YNLA-----

-KD-----D-Q-----VDFEALKKFLDDYAEK---YPAFKSA--VEK--AKEC-

----VKE-----DLP---GPP-----SVCLANRIVFCIGSVVM

---F-----

-----

-----ECPAE--NWSETEG

CKTLKDHMTECKPFFQRQ-----

-----  
-----  
-----  
-----

-----  
-----  
-----  
-----

>Msex-OBP20\_Msex202656\_

-----  
-----  
-----  
-----

-----MATD-----

-----KEGINADL-----

-----LRQD-RSKATLK

PISACCDIP-----ELGDAK-----PL---SECS-NP-----

-----KLPGPCKDVQCAFEK--SGFL-----

-TD--N--L-T-----LKKEVYKKHLRQWAKN---HDGWSDA--VEK-AISDC-

----VDK-----DLR---QYLD-----IPCKAYDVFTCTGIAML

---K-----

-----

-----KCP-----DAAWK

C-----

-----  
-----  
-----  
-----  
-----  
-----

-----

-----

-----

>Msex-OBP25\_Msex207317\_

-----

-----

-----

-----

-----MQTLRETRPRCTAERFLIMFKI-----

-----VLI--CAF--GI-----AA

SNADAPGD-----PPKV-YCGEIPY

KIFECLGSP-----RIIK-P-----ES---SMKC-D-----

-----KSISECDKMRCIFRE--EGWM-----

-VN-----N-V-----VDKSKVGASFDQFGKD---NPDWAAA--IGA-AKTEC-

----LAQ-----ELP---AQGV-----F---IGCPAYDILHCTLTLTI

---R-----

-----

-----NANPA--KWSSEE

CKYPRQYAGACPICPSNCFVPAIPTGSCNACLSLPRTP-----

-----

-----

-----

-----

-----

-----

-----

-----

>Msex-OBP28\_Msex210958\_

-----

-----

-----

-----

-----MYRL-----

-----ALL--LVL--SC-----VL

LVQAD-----D--EWMD-----FMQK-CGQLIHP

AGIRCCKKK-----YVST-----DL---TEDL-KECMQLP---

-----GKPPSCEIEICVAKK--RGFA-----

-SD---D--G-T-----INKAAFKALLSKMDDK-----DL--QAS-IVEDC-

----VDG-----DIS----EYGP-----D---DLCDLKRLHTCVALHLV

---V-----

-----

-----DCP----EWSNEGA

CSGSADVAADCIKSMQ-----

-----

-----

-----

-----

-----

-----

-----

-----

>Msex-OBP34\_Msex214192\_

-----

-----

-----

-----

-----

-----

EQRCRNPP-----T--APQK-----IERV-ITLCQDE

IKLSILREALDVIKEEHTMFLITEALDVIKEE-----HT---MPAQ-RKRNKRE--V

PFTHD-----EKRIAGCLLQCVYRK--VKAV-----

-DG---F--G-F-----PTLEGLVGLYSDGVNE-----RGYFMA--VLE-ASREC-

LMKNHDKF-----SRT---TPMD-----NGRNCDISFDIF-ECISDRIG

E---Y-----

-----

-----CGN-----AGL

-----

-----

-----

-----

-----

-----

-----

-----

-----

>Bmor-GOBP1\_OBP1\_NM\_001044031\_

-----  
-----  
-----  
-----  
-----

-----MW--KLV--VV-----LT  
VNLLQG-A-----L---TDVY-----VMKD-VTLGFGQ  
ALEQCREES-----QLTE-E-----KM---E-EF-FHFWNDD--F  
--KFE-----HR-ELGCAIQCMSRH--FNLL-----  
-TD---S--S-R-----MHHENTDKFIKSFPNG---E-ILSQK--MID-MIHTC-  
----EKK-----FDS---EP-D-----H---CWRILRVA-ECFKDACN  
K---S-----

-----  
-----GLA---PSMELIL  
AEFIMESEAD-----

-----  
-----  
-----  
-----  
-----  
-----  
-----  
-----K-----  
-----  
-----

>Bmor-GOBP2\_OBP2\_NM\_001044033\_





-----  
-----  
-----  
-----MS-IQG--QI-----  
-----A--L---AL-----MV  
YMAVGS-V-----D---ASQE-----VMKN-LSLNFGK  
ALDECKKEM-----TLTD-A-----IN----E-DF-YNFWKEG--Y  
--EIK-----NR-ETGCAIMCLSTK--LNML-----  
-DP--E--G-N-----LHHGNAMEFAKKHGAD---E-TMAQQ--LID-IVHGC-  
----EKS-----TPA---ND-D-----K---CIWTLGVA-TCFKAEIH  
K---L-----  
-----  
-----NWA---PSMDVAV  
GEILAE-----  
-----  
-----V-----  
-----  
-----  
-----  
-----  
-----  
-----  
-----  
-----  
>Bmor-PBP-A2\_PBP2\_OBP4\_AM403100\_  
-----  
-----

-----  
-----MK-----  
-----L-Q---VV-----LV  
VLTVM-V-----C--GSRD-----VMTN-LSIQFAK  
PLEACKKEM-----GLTE-T-----VL---K-DF-YNFWIED--Y  
--EFT-----DR-NTGCAILCMSKK--LELM-----  
-DG---D--Y-N-----LHHGKAHEFARKHGAD----E-TMAKQ--LVD-LIHGC-  
----SQS-----VAT---MP-D-----E---CERTLKVA-KCFIAEIH  
K---L-----  
-----  
-----KWA---PDVELLM  
AEVLNEVSWKS-----  
-----  
-----  
-----  
-----  
-----  
-----  
-----  
-----  
-----  
-----  
-----  
-----  
-----  
-----  
-----  
-----  
-----

>Bmor-PBP-B\_OBP5\_Gongetal\_2009\_  
-----  
-----  
-----

-----MKQR-----  
-----LRV--LLL-----RF  
CILQTVLS-----E---SGVD-----VVKN-LSLSFAR  
FFLECDEER-----HFQP-----EV---RLKV-MTFWYSE---  
--SST-----WDRDVGCAFLCIFKK--MEID-----  
-NP-----Q-D-----PSYRTHLELLSFANSE----DNKIANQ--MVE-IFYAC-  
----GEN-----TET-----DP-----CLWALEQV-KCYKNRIN  
Q---L-----  
-----  
-----GLT----PTF-----  
-----  
-----  
-----  
-----  
-----  
-----  
-----  
-----  
-----  
-----  
-----  
-----  
  
-----  
>Bmor-PBP-C\_PBP3\_OBP6\_NM\_001083626\_  
-----  
-----  
-----

-----MA--RYN-----  
-----I--V---VA-----VL  
VLGVVG-A-----R--GSSE-----AMRH-IATGFIR  
VLDECKQEL-----GLTD-H-----IL---T-DM-YHFWKLD--Y  
--SMM-----TR-ETGCAIICMSKK--LDLI-----  
-DG---D--G-K-----LHHGNAQAYALKHGAA---T-EVAAK--LVE-VIHGC-  
----EKL-----HES---ID-D-----Q--CSRVLEVA-KCFRTGVH  
E---L-----  
-----  
-----HWA---PKLDVIV  
GEVMTE-----  
-----  
-----I-----  
-----  
-----  
-----  
-----  
-----  
-----  
-----

>Bmor-OBP7

-----  
-----  
-----  
-----  
-----

-----  
-----AV-----TEEE-LKIEFTK  
LVMKCTKDH-----PVDM-S-----EL---MQLQ-QLIA-----  
---PK-----KT-ESKCLLACAYKL--NGVM-----  
-TS---Q--G-L-----YNLEHAYKIAEMSKNG---DEKRLEN--GKK-VADIC-  
----VKV-----NDV---EVSD-----GEKGCERAALIF-KCTLENAP  
KVFKF-----

-----  
-----GSS---EYNCQ--

-----  
-----  
-----  
-----  
-----  
-----  
-----  
-----  
-----  
-----  
-----  
-----  
-----

>Bmor-OBP8\_BAI44701\_

-----  
-----  
-----  
-----

-----MLRV-----  
-----VVI--CVC-----

-FLVIAPY-----G--INAS-----SLDD-LKMVYKN  
VIKECVGDY-----PITA-A-----DL---KLIK-ARQI-----  
---PN-----D-DIKCVFACAYKK--TGMM-----  
-TE---E--G-M-----LSVEGIKDMSQKYLSD---NPEQLRK--SKE-FAEAC-  
----SSV-----NDQ---QVSD-----GTKGCERAALIF-KCSTEKIT  
N---F-----

-----  
-----GFE---L-----  
-----  
-----  
-----  
-----  
-----  
-----  
-----  
-----  
-----  
-----  
-----

>Bmor-OBP9

-----  
-----  
-----  
-----  
-----MLRV-----  
-----VVI--CVC-----FL  
VVAPYGIN-----A---VSYE-----QKIK-IRDQLDR

AGFECFKDH-----KITE-D-----DI---KNLR-ANKP-----  
---AT-----GE-NVPCFIACVMKK--TGVM-----  
-ND---Q--G-V-----IRKGPVLELAKKVLAD----DKDIKK--LQD-YIHSC-  
----SHV-----NSE---TVHD-----KGKGCEFAMQAY-TCMSANAS  
K---F-----

-----  
-----GFN---I-----  
-----  
-----  
-----  
-----  
-----  
-----  
-----  
-----  
-----  
-----  
-----  
-----

>Bmor-OBP10

-----  
-----  
-----  
-----  
-----MLRV-----  
-----VVI--CVC-----FL  
VIAPYGIN-----A---VSDE-----QKIK-IREQIDK  
SGFECFKDH-----KITE-D-----DI---KNLR-ARKP-----

---AT-----GE-NVPCFIACVMKK--TGVM-----  
-ND---Q--G-V-----IHTEPVLQLAKKVLTD-----DKDIKK--LQD-YIHSC-  
----SHV-----NSK---TVHD-----KGQGCEFAIQTY-TCMSANAS  
K---F-----

-----GFD---V-----  
-----  
-----  
-----  
-----  
-----  
-----  
-----  
-----  
-----  
-----  
-----  
-----

>Bmor-OBP11\_BAH36759\_

-----MSAN-----  
-----SFV--VLA-----F  
CALAVGVN-----A--LTEE-----QKAE-ITKSSLP  
LIAECSKEF-----SVNQ-G-----DI---DAAK-KLGD-----  
-----PSGLNSCFVGCFMKK--AGII-----



-NA---S--G-L-----FDVAATIEKSKKYLTS-----EEDLKA--FEK-LTETC-

-----APE-----NDK---PVSD-----SDKGCERAKLLL-DCFVANKG

S---F-----

-----

-----SVF---SL-----

-----

-----

-----

-----

-----

-----

-----

-----

-----

>Bmor-OBP12\_NP\_001153664\_

-----

-----

-----

-----

-----MTSF-----

-----MVF--FVL-----S

VLTLKYSD-----A---LTDE-----QKNK-IQSKFIE

IGAECIVEH-----PISI-D-----DI---NSFK-NKKF-----

---PS-----GV-NAGCFVACIFNK--IGLF-----

-DD---K--G-N-----LSHNSALEKAKGIFNA-----DEEVKN--LEE-FLNRC-

-----AKV-----NGE---AVGD-----GVKGCERAKLAY-NCLIENSL

E---F-----

-----

-----GFN---IDF----

-----

-----

-----

-----

-----

-----

-----

-----

-----

>Bmor-OBP13

-----

-----

-----

-----

-----MLKI-----

-----HVL--LCF--GM-----A

ILYFGSAK-----A--VTPE-----ESKA-FEAF AKP

VIEQCQKDF-----GMDK-E-----SF---AQKN-L-----

-----DE-IDECLIACVVEK--FGIT-----

-ND---E---K-----IDGDALKALVTKFVGN-----EEERNK--INK-IVEEC-

-----TED-----ANK---SGDG-----T---CNTSTILF-LCLLKNGK

D---L-----

-----

-----WGF-----

-----

-----

-----

-----

-----

-----

-----

-----

-----

>Bmor-OBP14\_NP\_001140185\_

-----

-----

-----

-----

-----M-----ERKD-----

-----FYL--LIV-----VV

AL---TS-----G--VSSM-----SRQQ-LKNSGKM

LKKQCMGKN-----DVTE-E-----EI---GDIE-KGKF-----

---IE-----QK-NVMCYIACIYQM--TQII-----

-KN-----N-K-----ISYEASIKQIDLMYPP-----ELKES--AKA-SAGRC-

----KDV-----SKK---YKDI-----CEASYWTA-KCMYEDNP

K---D-----

-----  
-----FIFA-----

-----  
-----  
-----  
-----  
-----  
-----  
-----  
-----  
-----  
-----  
-----

>Bmor-OBP15

-----  
-----  
-----  
-----  
-----  
-----M-----FLKN-----  
-----IFI--ECV-----LL

YFVMLNTS-----F---VNTM-----TKQQ-IKNSGKI

LKKACISKN-----DVTE-D-----QI---SDID-KGKF-----

---IE-----DK-NVMCYIACVYSM--SQVV-----

-KN-----N-K-----FVHDAMVKQVDMMFPT-----EMRDA--VKA-SIANC-

----RGV-----AKN---YKDI-----CEASFWTA-KCMYEFDP

A---N-----  
-----

-----FVFA-----

-----

-----

-----

-----

-----

-----

-----

-----

-----

>Bmor-OBP16

-----

-----

-----

-----

-----M-----

-----RIS--FLF-----LI

SVTIITFD-----S---VFAM-----TRAQ-VKKTMTI

MKNQCMCKN-----GVTE-D-----QV----GKIE-EGIF-----

---LE-----NH-NVMCYIACVYKT--IQVV-----

-KN-----D-R-----LDKDLISKQIDVLYPQ-----EIRES--TKK-AVGDC-

----INL-----QEK---YDDW-----CEGIFRST-KCLYEKDP

A---N-----

-----

-----FIFP-----

-----  
-----  
-----  
-----  
-----  
-----  
-----  
-----  
-----

>Bmor-OBP17

-----  
-----  
-----  
-----  
-----  
-----

-----M-----TRQQ-LKNSGKI  
MKKTCMPKN-----DVTE-E-----EI---GQIE-QGKF-----  
---LE-----QR-NVMCYIACIYTV--TQVV-----  
-KN-----N-K-----LSYDAVIKQVDVMFPA-----EMRPA--VKA-AAENC-  
----KDI-----SKT---FKDI-----CEASYWTA-KCMYDFDP  
K---N-----  
-----  
-----FVFP-----  
-----

-----  
-----  
-----  
-----  
-----  
-----  
-----  
-----

>Bmor-OBP18

-----  
-----  
-----  
-----  
-----

-----M--ILI-----VI

AKFLILIS-----L---CETM-----TMKQ-IKNTGKM

MRKSCQPKN-----NVDD-E-----KI---NPIN-DGVF-----

---IE-----EN-EVKCYIACIMKM--ANTM-----

-KN-----G-K-----LNFEAAMKQADLLLPD-----EMKEP--TKE-AIVAC-

----RKV-----ADS---YKDV-----CDASFHVT-KCIYNHNP

S--V-----

-----

-----FFFP-----

-----

-----

-----  
-----  
-----  
-----  
-----  
-----  
-----

>Bmor-OBP19\_NP\_001140188\_

-----  
-----  
-----  
-----  
-----  
-----

-----M--TSAK-----TDVE-IKAWFLG  
QAVECSKDH-----PVTT-E-----EL---RMHK--HEL-----  
--PD-----SK-NAKCLMKCVFRK--CNWL-----  
-DS--K--G-M-----YDINAAYASSTKDFSD---DKTKQEN--ANK-LFDTC-  
----KSV-----NEE---NVGD-----GEEGCDRSLLLA-KCLTKAAP  
Q--V-----

-----  
-----SIY---YS-----  
-----  
-----  
-----



-----  
-----  
-----  
-----  
-----  
-----

>Bmor-OBP20\_ABPX\_NP\_001037500\_

-----  
-----  
-----  
-----

-----MAVH-----

-----IFL--ILA-----

--SYMALA-----AHGQ-----LDDE-IAELAAM

VRENCADDES-----SVDL-N-----LV---EKVN-AGTDLAT---

---IT-----DG-KLKCYIKCTMET--AGMM-----

-SD-----G-V-----VDVEAVLSLLPD-----SLKTK--NEA-SLKKC-

----DTQ-----KGS-----DD-----CDTAYLTQ-ICWQAANK

A---D-----

-----

-----YFLI-----

-----  
-----  
-----  
-----

-----  
-----  
-----  
-----  
-----

>Bmor-OBP21

-----  
-----  
-----  
-----

-----MITA-----

-----SLH--VIF-----A-L

LAFVYGGK-----DKPV-----LSEE-IKEIIQT

VHDECVGKT-----GVSE-E-----DI---TNCE-SGIF-----

--KE-----DV-KLKCYMFCLLEE--AGLV-----

-ND---D--G-T-----VDYEMFTSLIPE-----EYFDR--ATK-MIFSC-

----KEL-----DTP---DKDK-----CERAFEVH-KCSYEKDP

D---F-----

-----

-----YFLF-----

-----

-----

-----

-----

-----

-----  
-----  
-----  
-----

>Bmor-OBP32

-----  
-----  
-----  
-----

-----MYSHKYLNDFTNIPEI-----  
-----LII--LLS--SVALMSYGYNTKL  
FSHSLGSE-----PSLS-----ILYA-RDKKSDK  
VTNECLMEM-----YPKN-----LYKY-PLRI-----  
-----DRNDIPCIHCVLKK--FGII-----  
-SN--D--G-F-----INIKNYRVRVQAIHRY-----DPRIL--ISD-VGETC-  
----AQN-----ING-MNLDHDV-----CKKAKVFN-DCTQLYAI  
SYREP-----

-----  
-----EDW-----  
-----  
-----  
-----  
-----  
-----

-----  
-----  
-----

>Bmor-OBP33

-----  
-----  
-----  
-----  
-----  
-----  
-----

-----MYA-HDKLSDM

IADQCLNEM-----YPRS-----KRLE---I-----

-----EESDEPCIIFCVLKK--FGIM-----

-SP---T--G-V-----INLEAYRKRVQLPEQL-----AQRNS--IND-FGSAC-

----LES-----AEA-TQHKQDV-----CKKAKVFN-ECTHLYKI

L---L-----

-----  
-----K-----

-----  
-----  
-----  
-----  
-----  
-----  
-----  
-----

>Bmor-OBP34

-----  
-----  
-----  
-----  
-----  
-----MEKMILLNVFAV-----  
-----VLP--CVL--AS-----RT  
RGSSGTLV-----D--FTDP-----KVQG-HLDALVR  
MAQSCVIKV-----RATP-K-----DV---RAYF-TNSS-----  
---PV-----SR-SGQCFATCMLEQ--SDII-----  
-NH-----G-K-----VNRDLLVHLAGLVNGK----NSRVVRK--LNS-VSRLC-  
----LDS-----ISG---MTDR-----CQLASTYN-DCLNENMI  
E---F-----  
-----  
-----AFP---LDIAEEA  
VRKMPFHLLIQPK-----  
-----  
-----  
-----  
-----  
-----  
-----  
-----

-----  
>Bmor-OBP35

-----GMST-HVLDFKR

NMTECLKEV-----QNND-K-----RP---IKRL-SPKQ-----

--ES-----PI-HGECLACVLKK--NGVI-----

-QN-----G-K-----VNKDNLMAVSKFHAK---ETKLMKK--LEK-NLDRC-

----INI-----SVK---NHDE-----CSLASQLN-DCTNDIMA

S---S-----

-----KQK---ILFNY--

>Bmor-OBP36\_NP\_001140186\_

-----  
-----  
-----  
-----  
-----MAVSEI-----  
-----SRI--LTF--LTIVSFIYIVYSF  
KPLTKDEH-----I--ERYN-----KMNE-DIEPFRK  
NLTECARQV-----KASM-A-----DV---EKFL-KRIP-----  
---QS-----NM-EGKCFVACILKR--NSLI-----  
-KN-----N-K-----LSQENLLEVNRAVYGD---DSEVMSR--LKT-AILEC-  
----SKI-----VED---IFEI-----CEYASVFN-DCMHMKME  
H---I-----  
-----  
-----LDK---ITMERRM  
EALGQMSSNPDEWSEEEDEMLKLVKDEL-----  
-----  
-----  
-----  
-----  
-----  
-----  
-----  
-----  
-----

>Bmor-OBP37\_NP\_001140187\_





>Bmor-OBP39

-----  
-----  
-----MVRKISALL-----  
-----CCF--CVL--GISMCDSAISTDN  
EQRCKNPP-----T--APQK-----IERV-ITLCQDE  
IKLSILREA-----LDVIKEE-----HT----MPAE-RKRNKRE--V  
PFTHD-----EKRIAGCLLQCVYRK--VKAV-----  
-DG---F--G-F-----PTLEGLVGLYSDGVNE----RGYFMA--VLE-ASREC-  
LMKNHDKF-----SRT---TPMD-----NGRNC DV SFDIF-ECISDRIG  
E---Y-----

-----  
-----CGT-----SGL

-----  
-----  
-----  
-----  
-----  
-----  
-----  
-----  
-----  
-----  
-----

>Bmor-OBP22

-----  
-----  
-----

-----  
-----MLKV-----  
-----FVV--VVC--TL-----GASQ  
LCAALYTQ-----K--VAVS-----FPKD-KTTIVVE  
AMKSCIAKT-----GANP-N-----VI---EVIS-SGKV-----  
---SE-----DE-KFKEFFYCACND--IGVV-----  
-NP---D--G-H-----IKVKECIELFPK-----ETQPL--VEP-VIKNC-  
----DK-----EGV-----NK-----YDTLFKYL-KCFQETSP  
V---R-----

-----  
-----VTL---A-----

-----  
>Bmor-OBP23\_NP\_001153665\_  
-----  
-----  
-----  
-----

-----MTSK-----  
-----VLL--SCV--VL-----AVLA  
TTVLAEDS-----R--KLVS-----FAPE-VAKKLKV  
LIQECLNEN-----GLGE-D-----AI---EVIR-AGEY-----  
--RE-----DE-PFQNLVYCAKK--FGAL-----  
-DE---N--N-R-----IISQVAAASFPK-----DID---VVT-VIESC-  
----GKE-----DGN-----TP-----VEQVFKYF-KCFQKNSP  
V---R-----

-----  
-----MQL---Y-----

-----  
>Bmor-OBP25

-----  
-----  
-----  
-----  
-----MKS-----

-----VLI--CLA-----  
-FAVFNCG-----A---DNVH-----LNED-EREKANW  
YTAECGVET-----GVST-E-----VI---NAAK-IGKY-----  
---SK-----DK-AFKKFVLCFFKK--SAIL-----  
-NS---D--G-T-----LNMVVALAKLPSG-----V NKSE--AQS-VLEQC-  
----KNK-----TGQ-----DA-----ADKAFAIL-QCFHKGTK  
T---H-----

-----  
-----ILF-----  
-----  
-----  
-----  
-----  
-----  
-----  
-----  
-----  
-----  
-----  
-----

>Bmor-OBP26\_NP\_001159622\_

-----  
-----  
-----  
-----  
-----MKS-----  
-----VLI--CLA-----

-FAVFNCG-----A---DNVH-----LAET-QKEKAKQ  
YTSECVRES-----GVST-E-----AI---NAAK-IGKY-----  
---SK-----DK-AFKNFVLCFFNK--SAIF-----  
-NS--D--G-T-----LNMDVALAKLPPG-----VNKSE--AQS-VLKQC-  
----KNK-----TGQ-----GA-----ADKAFEIF-RCYYKGTK  
T---H-----

-----ILF-----

>Bmor-OBP27\_NP\_001106744\_

-----MKSV-----

-----VLI--CLA-----

-FAVFNCG-----A---DNVH-----LTET-QKEKAKQ

YTSECVKES-----GVST-E-----VI---NAAK-TGQY-----  
---SE-----DK-AFKKFVLCFFNK--SAIL-----  
-NS---D--G-T-----LNMDVALAKLPPG-----V NKSE--AQS-VLEQC-  
----KDK-----TGQ-----DA-----ADKAFEIF-QCYYKGTK

T---H-----

-----

-----ILF-----

-----

-----

-----

-----

-----

-----

-----

-----

-----

-----

-----

-----

-----

-----

-----

-----MLKV-----

-----FIV--TFF--AF-----Q

LSAIARLQ-----ANGCVAVP-----FPKD-KTIIIVE

AMKSCIAKT-----GANP-N-----FI---DVIR-SGKV-----

---SE-----DE-KFKEFYCYCTCND--TGFV-----  
-NP---D--G-H-----IKVKECIELFPK-----ETQPL--VEP-VIKNC-  
----DKE-----EGV-----NK-----YDTLKFKL-KCFQETSP  
V---R-----

-----VAL---A-----

>Bmor-OBP29

-----MTGP-----

-----AAA--AVL---LA-----LLAA

AGQATTGC-----K--NCVI-----LGKE-ERAMFRS

HSDACLAQS-----RVEP-R-----LL---ESMM-NGEL-----

---ID-----DA-ALRKHVYCVLLS--CKMI-----



-GK---D--G-K-----LLKAAILGKLAAR-----PAGRD--VTK-VLEAC-

----AEQ-----PGA-----SP-----EDVAWNIF-RCGYNRKA

V---L-----

-----

-----FDYMPAGGASSGNT

ENHP-----

-----

-----

-----

-----

-----

-----

-----

-----

>Bmor-OBP30

-----

-----

-----

-----

-----MRSF-----

-----VIL--LNYGLLCCGQFMAEDYYY

DIVTRDPD-----DLMR-----EKEN-EVRALRA

FQADCAEDV-----QVKP-D-----LV---VNLK-SGDWQ-----

---TE-----DV-SLKKWALCVLMK--LGLM-----

-TA---Q--G-V-----FKMNEAMSKIPDM-----NDKII--AEK-LIDDC-

----LSL-----QAT-----TP-----HDAAWNYI-KCHHQKDP

E---G-----

-----

-----NFS---SLNIF--

-----

-----

-----

-----

-----

-----

-----

-----

-----

>Bmor-OBP31\_NP\_001040212\_

-----

-----

-----

-----

-----MKTF-----

-----IVF--VVC---VV-----

-----LAQA-----LTDE-QKENLKK

HRADCLSET-----KADE-Q-----LV---NKLK-TGDFK-----

---TE-----NE-PLKKYALCMLIK--SQLM-----

-TK---D--G-K-----FKKDVALAKVPNA-----EDKLK--VEK-LIDAC-

----LAN-----KGN-----SP-----HQTAWNYV-KCYHEKDP

K--H-----

-----

-----ALF---L-----

-----

-----

-----

-----

-----

-----

-----

-----

-----

>Bmor-OBP40

-----

-----

-----

-----

-----MSEF-----

-----IQP--SWR-----TQ

CNFRLNWD-----NRNR-LSIDISH

GAATTQTPV-----PTTKPK-----AL---RDFM-----

-----VVPQSCDKTTCVFKK--LNIV-----

-SD---K--G-V-----VDVKSEFIKLLDKFTNS---YPVWNSA--KAR-VITTC-

----LRK-----SLI---AYD-----GGCELNNILACTFDVLS

E-----

-----  
-----NCP---LNGNNQT

C-----

-----  
-----  
-----  
-----  
-----  
-----  
-----  
-----  
-----  
-----

>Bmor-OBP41

-----  
-----  
-----  
-----

-----MLTI-----

-----LFL--LPI--VV-----GV

LSGNIPE-----QPRV-YCGELPN

TIYSCLGNP-----KIIQ-P-----EV---SEKC-N-----

-----KPISECDKTRCIFKE--SGWA-----

-KN-----N-V-----IDKKKVSDYFEQFAKD---NPDWSAA--VQN-FKTTC-

----LSD-----SLK---PQGV-----D---TNCPAYDIIHCALISFI

---K-----

-----

-----FASPS--QWSTSEQ  
CVYPRQYAGACPVCPERCFAPSVPNGSCNACLALLRTP-----

-----  
-----  
-----  
-----  
-----  
-----  
-----  
-----

>Bmor-OBP42\_NP\_001159621\_

-----  
-----  
-----  
-----

-----MMGY-----

-----ACV--FVI--LA-----VL

QAISAEDP-----P---GLPPFLKDA---PEKC-KSPPRVK

NPNECCISE-----PFFKEA-----DF----IECG-IEKPGSE---

-----RGPPDCSKQNCLLKK--YNLL-----

-KN--D--E-T-----PDIEAIKSLLDKYIEK---NPSFKSS--VEK--AKEC-

----LRE-----DLP---GPP-----QICLANRMTLCIGTVLL

---M-----

-----

-----ECPDE--KWNTTDD

CKAFKDHMTECQKYFPK-----

-----

-----

-----

-----

-----

-----

-----

-----

>Bmor-OBP43

-----

-----

-----

-----

-----MKVC-----

-----VLF--AIF-----

-----TVAQ-AAKATLK

PISACCNIP-----ELGNPE-----PL----AECS-NP-----

-----KLPGPCKDIQCVFEK--SGFL-----

-TE--N--K-T-----LIKEAYKTHLRQWAKE---HEGWSVA--VEK-AISDC-

----VDK-----DLR---QYLE-----FPCSAYDVFTCTGIAML

---K-----

-----

-----KCP-----NEHWT

C-----

-----  
-----  
-----  
-----  
-----  
-----  
-----  
-----

>Bmor-OBP44

-----  
-----  
-----  
-----

-----MSRL-----

-----VLF--FTI--LV-----

-----V---LQEF-----IINL-YFNFITE

IDSCCVKKY-----PKLFDSE-----FI----TECY-NTQR-----

-----KANDKCERDMCVARK--LNLL-----

-TE---E--D-S-----INKDALLRFVEEGFKT----EIDLVNA-----IKKKC-

----FEE-----DIS---NIGK-----P---EMCEVAKYKICITSRMA

---E-----

-----

-----DCP---KWDSKGI

CSSAQQKVENFMKMLS-----

-----

-----  
-----  
-----  
-----  
-----  
-----  
-----

>Apol-PBP1\_X17559\_

-----  
-----  
-----  
-----

-----ML--RKI--SL-----

-----L---LL-----PV

FVAINL-V-----H--SSPE-----IMKN-LSNNFGK

AMDQCKDEL-----SLPD-S-----VV---A-DL-YNFWKDD--Y

--VMT-----DR-LAGCAINCLATK--LDVV-----

-DP---D--G-N-----LHHGNAKDFAMKHGAD----E-TMAQQ--LVD-IIHGC-

----EKS-----APP----ND-D-----K---CMKTIDVA-MCFKKEIH

K--L-----

-----

-----NWV---PNMDLVI

GEVLAE-----

-----

-----V-----



-----  
-----  
-----  
-----  
-----  
-----

>Apol-PBP2\_AJ277266\_

-----  
-----  
-----  
-----

-----M-----SL-----

-----S--L---FL-----AM

LVTINL-V-----Q---ASPE-----IMKN-LCMNYGK

TMDQCKQEL-----GLPD-S-----VI---N-DL-YNFWKDD--Y

--VMT-----DR-LAGCAINCLSTK--LDIV-----

-DP---D--G-N-----LHHGNAKEFAMKHGAD---D-GMAQQ--LVD-IIHRC-

----EKS-----TPP----ND-D-----K---CTKTMDIA-MCFKKEIH

K---L-----

-----

-----NWV----PNMDLVV

CEVLAV-----

-----

-----V-----

-----

-----  
-----  
-----  
-----  
-----

>Apol-PBP3\_AJ277267\_

-----  
-----  
-----  
-----

-----MI--AKT---FN-----

-----L--L---VI-----VY

LSTNTG-V-----D---ASQE-----IMKT-MTLTFTK

GLDACKKEM-----DLPD-T-----VD---V-DF-NNFWKED--Y

--VVT-----NR-DAGCAIVCLASK--INLV-----

-DS---M--G-I-----LIHGSAHEFAKQHGAD---D-NMAKQ--LSD-TLHTC-

----ETI-----IGT---GN-D-----E---CTRALHVA-NCFKVEMH

K---L-----

-----

-----DWA---PSMDLII

GELLAE-----

-----

-----I-----

-----

-----

-----  
-----  
-----  
-----

>Aper-GOBP1\_Y10970\_

-----  
-----  
-----  
-----

-----MAHT-----

-----LQ--TVV--LL-----LG

TSILHP-I-----L---ADV-----VMKD-VTLGFGQ

ALEKCREES-----QLTE-E-----KM----E-EF-FHFWSED--F

--KFE-----HR-ELGCAILCMSRH--FNLL-----

-TD---S--S-R-----MHHENTDKFIKSPNN---E-VLSKH--MVN-LIHSC-

----EQQ-----HDA---DL-D-----H---CWRILRVA-ECFKRSCQ

E---A-----

-----

-----GVA----PSMELLM

AEFIMESEI-----

-----  
-----  
-----  
-----  
-----

-N-----

-----

-----

>Aper-GOBP2\_X96772\_

-----

-----

-----

-----

-----MGYK-----

-----LL-LMY-----I

AVIDS-V-----I--GTAE-----VMSH-VTAHFGK

ALEECRDES-----GLSP-E-----IL---N-EF-KHFWSED--F

--DVV-----HR-ELGCAIICMSNK--FSL-----

-KD---D--T-R-----IHHVNMHDYVKSFPNG----E-VLSAK--MVN-LIHNC-

----EKQ-----YDD---IT-D-----E---CDRVVKVA-ACFKVDAK

K---E-----

-----

-----GIA---PEVAMIE

AVIEKY-----

-----

-----

-----

-----

-----

-----

>Aper-PBP1\_X96773\_

-----  
-----  
-----  
-----  
-----  
-----  
-----ML--GKI--SL-----  
-----L---LL-----PV  
FVAINL-V-----H--SSPE-----IKN-LSQNFCK  
AMDQCKQEL-----NIPD-S-----VI---A-DL-YNFWKDD--Y  
--VMT-----DR-LAGCAINCMAK--LDVV-----  
-DP---D--G-N-----LHHGNAKEFAMKHGAD---A-SMAQQ--LVD-IIHGC-  
----EKS-----APP---ND-D-----K---CMKTIDVA-MCFKKEIH  
K---L-----  
-----  
-----NWV---PDMDVVL  
GEVLAE-----  
-----  
-----V-----  
-----  
-----  
-----  
-----  
-----

>Aper-PBP2\_X96860\_

-----MI--RKV---LL-----

-----S--V---LL-----AV

LMTINL-G-----Q--ASPE-----VMKN-LCMNYGK

AMDQCKQEL-----NLPD-S-----VI---A-DL-YNFWKDD--Y

--VMT-----DR-LAGCAINCLSTK--LDIV-----

-DP---D--G-N-----LHHGNAKEFAMKHGAD---D-GMAHE--LVD-IIHGC-

----EKS-----SPP---ND-D-----K---CIKTMDIA-MCFKKEIH

K---L-----

-----NWV---PNMDLVV

GEVLAE-----

-----V-----

>Aper-PBP3\_AJ277265\_

-----  
-----  
-----  
-----  
-----MI--AKT---FN-----  
-----L--L----VI-----VY  
LSTNTA-V-----D---SSQD-----VMKS-MTLTFTK  
GLDACKKEM-----DLPD-T-----ID---V-DF-NNFWKED--Y  
--VVT-----NR-NAGCAIMCLASK--VDLV-----  
-DS---M--G-I-----LIHGSSHEFAKQHGAD---D-NMAKQ--LSD-TLHSC-  
----EKT-----IGT----LN-D-----E---CLRALNVA-NCFKVEIH  
K---L-----  
-----  
-----DWA---PSMDLII  
GEILAE-----  
-----  
-----I-----  
-----  
-----  
-----  
-----  
-----  
-----

>Hvir-GOBP1\_X96862\_

-----  
-----  
-----  
-----  
-----M-----  
-----PG--VLR--AL-----LL  
LAAAAP-L-----L---ADV-----VMKD-VTLGFGQ  
ALDKCREES-----QLTE-E-----KM---E-EF-FHFWRDD--F  
--KFE-----HR-ELGCAIQCMSRH--FNLL-----  
-TD---S--S-R-----MHHDNTEKFIQSFPNG---E-VLARQ--MVE-LIHSC-  
----EKQ-----FDH---EE-D-----H---CWRISHLA-DCFKSSCV  
Q---R-----  
-----  
-----GIA---PSMELMM  
TEFIMEAEA-----  
-----  
-----  
-----  
-----  
-----  
-----  
-----  
-----R-----  
-----  
-----  
>Hvir-GOBP2\_X96863\_  
-----



```
-----  
-----  
-----MTSK-----  
-----SC--LLL-----VAM  
VTLTTS-V-----M---GTAE-----VM SH-VTAHFGK  
ALEECREES-----GLSA-E-----VL----E-EF-QHFWRED--F  
--EVV-----HR-ELGCAIICMSNK--FSLL-----  
-QD---D--S-R-----MH HVNMHDYVK SFPNG---H-VLSEK--LVE-LIHNC-  
----EKK-----YDT---MT-D-----D---CDRVVKVA-ACFKVDAK  
A---A-----  
-----  
-----GIA----PEVTMIE  
AVMEKY-----  
-----  
-----  
-----  
-----  
-----  
-----  
-----  
-----  
-----  
-----  
  
>Hvir-PBP1_X96861_  
-----  
-----
```

-----  
-----  
-----MM--SVR-----  
-----L--M---LV-----VA  
VWLCLR-V-----D---ASQD-----VMKN-LSMNFAK  
PLEDCKKEM-----DLPD-S-----VT----T-DF-YNFWKEG--Y  
--EFT-----NR-HTGCAILCLSSK--LELL-----  
-DQ---E--M-K-----LHHGKAQEFAKKHGAD----D-AMAKQ--LVD-MIHGC-  
----SQS-----TPD---ATDD-----P---CMKALNVA-KCFKAKIH  
E---L-----  
-----  
-----NWA---PSMELVV  
GEVLAE-----  
-----  
-----V-----  
-----  
-----  
-----  
-----  
-----  
-----  
-----  
-----  
>Hvir-PBP2\_AM403491\_  
-----  
-----  
-----

>Slit-GOBP1

-----PKW---VF-----  
-----A--R----AF-----CL  
VLMMGS-A-----M--SSKE-----LLTK-MTGGFTK  
VVDHCKTEL-----NVGD-H-----IM---Q-DM-YNFWREE--Y  
--QLV-----NR-DLGCMIMCMTAK--LDLV-----  
-GD--D-Q-K-----MHGKAEEFAKSHGAD---D-ALAKQ-LVG-LIHGC-  
----ETQ-----HQA---IE-D-----H--CSRTLEVA-KCFRTKIH  
E---L-----  
  
-----KWA---PSMEVIM  
EEIMTA-----  
  
-----A-----

-----  
-----ML--LLL--AL-----PL  
LAAVLP-L-----R---ADV-----VMKD-VTLGFGQ  
ALDKCRQES-----QLTE-E-----KM---E-EF-FHFWRDD--F  
--KFE-----HR-ELGCAIQCMSRH--FNLL-----  
-TD---S--S-R-----MHHENTEQFIQSFPNG---E-VLARQ--MVE-LIHAC-  
----EKQ-----HDH---ED-D-----H---CWRILHVA-ECFKQACV  
Q---R-----

-----  
-----GIA---PSMEMMI  
TEFIMEAEA-----

-----  
-----  
-----  
-----  
-----  
-----  
-----  
-----  
-----  
-----R-----  
-----  
-----

>Slit-GOBP2

-----  
-----  
-----  
-----  
-----

-----V--F---VV-----YA

LYLTSA-V-----L---GSQD-----LMAK-MTKGFTR  
VVDDCKTEL-----NVGD-H-----IM----Q-DM-YNYWRED--Y  
--QLI-----NR-DMGCMLLCMAKK--LDLM-----  
-DD---Q---T-----MHHGKTEDFAKSHGAD----D-DVAKK--LVS-VIHEC-  
----EQQ-----HTG----IA-D-----D---CMRVLEVA-KCFRTKIH  
E---L-----

-----KWA---PSMEVIM

EEVMTA-----

-----V-----

>Slit-PBP2

-----M---SLR-----

-----V--A---LV-----VA

ASLLVV-V-----Q---ASQD-----VMKN-LAINFAK

--ELT-----NR-QTGAILCLSSK--LEIL-----

-----AQS-----TPD---VAAD-----P---CMKTLNVA-KCFKLKVH

-----

GEVLAE-----

-----

$$\text{-----}V\text{-----}$$

-----

---

-----

---

-----MG--SRN--VF-----

-----V--A---LV-----VL

VLEEKHEL-----NMND-H-----LI---A-DL-FHYWKLE--Y

```
--TLL-----NR-DTGCAIICMGKK--LDLL-----  
-DA---N-G-R-----MHHGNAQEFAKKHGAG---D-EVASQ--IVQ-IIHEC-  
----EKK-----HER---DD-D-----E---CLRVLEVA-KCFRTGIH  
E---L-----  
  
-----  
-----NWQ---PNVEVIV  
SEVLTE-----  
  
-----  
-----I-----  
  
-----  
-----  
-----  
-----  
-----  
-----  
-----  
-----  
  
-----  
>AseI-PBP_AB285328_  
  
-----  
-----  
-----  
-----  
  
-----MQ--RSW---CFYCR-----  
-----LLV--V---LG-----VF  
LALVQE-R-----E--CSQE-----VMHN-LSKGFAE  
VLEDCKKQE-----NVGD-H-----IM---Q-DF-YNFWHEE--Y  
--SLV-----NR-EMGCIIILCMAGK--LDLL-----
```



--D---G--D-T-----MHHGNAHEFAKKHGAD----D-ALAKQ--LVG-LVHEC-

----EQA-----SAS---VE-E-----R---CARALET-KCFRGKIH

G--L-----

-----

-----KWA---PSMRVVM

EEVMAD-----

-----

-----M-----

-----

-----

-----

-----

-----

-----

>Asel-PBP2\_AB327273\_

-----

-----

-----

-----

-----MR--TNK-----

-----V--V---LI-----LL

MSMIAI-V-----T---PSQD-----VMKT-LTINFGK

PMEICKKEL-----DLPE-A-----VT---K-EF-LNFWRDG--Y

--EVT-----NR-LTGCAIMCISEK--LELL-----

-DE---G--Y-K-----LHHGNAKDFAMKHGAD----A-GMAQQ--LVD-IIHGC-

----NES-----TPD---NT-D-----H---CLKTVAVA-MCFKHKIH

E---L-----

-----

-----DWA---PNADLII

AEVLAE-----

-----

-----V-----

-----

-----

-----

-----

-----

-----

>Eobl-GOBP1\_FJ156732\_

-----

-----

-----

-----

-----MAR-----

-----LA--SSV--LA-----VV

AVAAAA-V-----V---ADVQ-----VMKD-VTLGFGQ

ALEVCREES-----QLSQ-D-----VM---E-EF-FHFWRED--F

--KFE-----SR-AVGCALQCMSRH--FNLL-----

-TD---S--S-R-----MHHENTHRFIESFPNG---S-VLAKQ--MVS-LIHGC-

----EQQ-----HEA---EP-D-----H---CWRILRVA-ECFKRRCQ

E---A-----

-----

-----GIA---PSMEIIM

AEFIMETEA-----

-----

-----

-----

-----

-----

-K-----

-----

-----

>Eobl-GOBP2\_FJ156733\_

-----

-----

-----

-----

-----MKSV-----

-----LV--ATV-----V

LSVVGL-A-----M--GTAE-----VMSH-VTAHFGK

ALSECREES-----GLTP-E-----VL---E-EF-QHFWRED--F

--EVV-----HR-ELGCAIICMSNK--FSSL-----

-QE---D--S-R-----IHHVNMHDYVKGFPNG---Q-VLSAK--MVE-LIHNC-

----EQQ-----YDD---IT-D-----D---CARVVKVA-ACFKRDAK

K---E-----

-----  
-----GIA----PEVTMIE

AVMEKY-----

-----  
-----  
-----  
-----  
-----  
-----  
-----  
-----  
-----  
-----

>Pxyl-GOBP1\_EU368114\_OBP1\_JN088193\_

-----  
-----  
-----  
-----

-----MERR-----

-----WC--LLV--LA-----AA

AAGLPGVV-----R--GTVE-----VMKD-VTLGFGE

ALEQCREQS-----QLTE-E-----MM---E-EF-YHFWRED--F

--KFE-----AR-AVGCAIHCMSRY--FNLL-----

-GE--Q--Q-R-----MHHDNTHKFIQSFPNG----E-VLSHQ--MVG-IIHTC-

----EQQ-----HDA---ET-D-----H--CWRILRVA-ECFKRESQ

A---Q-----

-----

-----GLA---PSMEMLM

AEFIMEADV-----

-----

-----

-----

-----

-----

-----

-----

-----

>Pxyl-GOBP2\_EU368115\_OBP2\_JN088194\_

-----

-----

-----

-----

-----MASV-----

-----WS--LVV--CG-----LM

MAALPA-A-----R---GTAE-----VMSH-VTAHFGK

TLEECREES-----GLSG-E-----IM----E-EF-HHFWRED--F

--EVV-----HR-ELGCAIICMSNK--FQLM-----

-QD---D--A-R-----MHHENMHDYIKSFPKG---D-LLSET--MVR-LIHNC-

----EKK-----YDD---ID-D-----E---CSRVVKTA-ACFKKDAQ

A---E-----

-----

-----GIA----PELTMIE

AVLEKY-----

-----

-----

-----

-----

-----

-----

-----

-----

>Pxyl-PBP2\_AB263118\_

-----

-----

-----

-----

-----MV--KMITKKPA-----

-----C--L---MM-----VL

MCALKK-V-----E---SSAD-----VMKG-LSENFGK

ALGDCKKEL-----DLPD-S-----IM----T-EF-YNFWKDD--Y

--VLS-----DR-STGCAIICLSSK--LDLL-----

-DP---D--G-N-----LHHGNAKDFALKHGAD---E-GMAGQ--LVG-MIHEC-

----EKA-----APD---NP-D-----A--CLKVLDIA-NCFKKKIH

E---L-----

-----

-----KWA---PSMDVVV

AEVLAD-----

-----  
-----V-----

-----  
-----  
-----  
-----  
-----  
-----  
-----

>Pxyl-PBP1\_FJ201994\_

-----  
-----  
-----  
-----

-----MW--FPV--RL-----

-----S--A---VL-----LI

TLAVMD-T-----Q--GSKE-----TMKD-ITSGFFK

VLNECKHEL-----NLPD-H-----LV---G-DF-YHYWRQE--Y

--ALL-----DR-DLGCAILCMSRK--LELI-----

-DA---S--G-K-----LHHGNTQEFAEKHGAD----N-SMASK--LVE-VLHSC-

----EKQ-----HEA---VS-D-----E---CQRALEVA-KCFRSSVH

E--L-----

-----

-----GWA---PTIDVII

EEVLTD-----

-----

-----M-----

-----

-----

-----

-----

-----

-----

>Pxyl-OBP3\_JN088195\_

-----

-----

-----

-----

-----

-----

-----

IAMNCTKKY-----PLEV-H-----EI---LDLQ-KSKV-----

---PT-----KK-TAKCLLACAYRL--EGSM-----

-NE--K--G-L-----LDYEHMMKTADLLADG---DEKRL-----

-----

-----

-----

-----

-----

-----

-----



-----  
-----  
-----  
-----  
-----  
-----

>Pxyl-OBP4\_JN088196\_

-----  
-----  
-----  
-----  
-----  
-----

-----EEFIQ

LGMECAKQH-----QVTP-E-----EV---QLMH-QHVI-----

---PD-----GR-GARCLVACVFKK--KDLI-----

-ND---K--G-M-----LDIDAAHSMADKEHLD---DPTMIE-----

-----  
-----  
-----  
-----  
-----  
-----  
-----  
-----

-----  
-----  
-----  
-----  
-----

>Dple-GOBP1\_DPOGS210500\_mod\_EHJ71301\_AB\_DpOBP1\_DPGLEAN01448\_

-----  
-----  
-----  
-----

-----MTSR-----

-----SGR--RLL--LL-----LL

VQLAVQ-L-----K---ANVD-----VMKD-VTLGFGE

ALKLCREES-----QLTE-E-----KM---E-EF-FHFWRDD--F

--KFD-----DR-AVGCAIKCMSSH--FDLL-----

-TD--S--H-R-----MHHRNMDNFIKSFPNG---E-VLSQQ--MVT-LIHEC-

----EQQ-----HDS---EE-D-----H---CWRILRVA-ECFKSSCK

K---H-----

-----

-----GIA---PTMELLM

AEFVMESEA-----

-----  
-----  
-----  
-----

-----  
-N-----

-----  
-----  
>Dple-GOBP2\_DPOGS210512\_mod\_EHJ71306\_AB\_DpOBP2\_DPGLEAN01461\_

-----  
-----  
-----  
-----  
-----MAVR-----

-----GL--LLL--SA-----VL

AATSVT-V-----D--GTAE-----VMSH-VTAHYGK

SLEECKERKET-----GLSK-E-----IL---E-EF-KHFWSDD--F

--EIV-----HR-PFGCTLICMSNK--FALL-----

-QD--D--A-R-----MHHINMNDYVKGFPEG---D-VLADK--LVQ-MIHKC-

----EKE-----YDD---IK-D-----D---CDRVVKVA-ACFRADAK

K---E-----

-----  
-----GIA----PEVAMIE

AVMEQY-----  
-----  
-----  
-----  
-----  
-----

-----

-----

-----

>Dple-PBP-B\_DPOGS210513\_EHJ71307\_AB\_DpOBP5\_DPGLEAN01462\_

-----

-----

-----

-----

-----

-----MAI--MMF--AI-----FI

LSIFIPSV-----N---LNQD-----VMKS-LSYKFGT

KLFECGERT-----NYTR-----AM---ARDI-LHIWEES--Y

--DLN-----HD-ETGCLVLCAMVR--LELL-----

-DQ---Q--G-N-----MIVENTEGFIRANGGD---D-SMVSF--LIQ-LYSMC-

----REK-----TSS---ISNG-----CKAAIELS-KCFRAAIQ

Q---I-----

-----

-----GWV---PDTTSL

VISYD-----

-----

-----

-----

-----

-----

-----

-----

-----

>Dple-PBP-C\_DPOGS210514\_EHJ71308\_AB\_DpOBP6\_DPGLEAN01463\_

-----

-----

-----

-----

-----MN--KSC-----

-----V--F---VF-----AL

IFVNVQ-K-----V---QSNE-----VMKG-ITSSFFK

VLDECKREL-----GLTD-N-----VL----T-DL-YYFWKQD--H

--PLM-----HR-DTGCAIVCMSQK--LNLL-----

-DT---I--G-K-----LHHGNAQEFAINHGAG----E-QMAKK--LVT-MVHEC-

----EQQ-----FME----QE-D-----S---CLRALDVA-KCFRTAMH

D---V-----

-----

-----NWA----PKFDIIV

TEVLTEVK-----

-----

-----

-----

-----

-----

-----

-----

-----

>Dple-PBP-D\_DPOGS210497\_EHJ71309\_AB\_DpOBP3\_DPGLEAN01445\_

-----

-----

-----

-----

-----MALFC-W---RL-----

-----L--F---AA-----GV

LSLAQG-T-----L---ASQE-----IMKK-LTTGFVK

AMEECKAEL-----NLGD-H-----II---Q-DF-MNYWREE--Y

--ELL-----NR-DTGCAIMCMASK--HDLI-----

-TE---D--M-K-----IHHENAHEFAKSHGAD----D-DLAKQ--LVQ-MIHDC-

----EKQ-----FTD----IT-D-----D---CSKTLEIS-KCFRTKIH

E---L-----

-----

-----KWA---PSMETIL

EELMTE-----

-----

-----T-----

-----

-----

-----

-----

-----

-----

>Dple-OBP2\_DPOGS207887\_EHJ65656\_AB\_DpOBP19\_DPGLEAN06529\_

-----  
-----  
-----  
-----  
-----  
-----

-----MKKWFLE

LTVECSKEH-----PVTKE-----EI---QMLK-DHKI-----

---PD-----NK-NVKCLMGCVFRK--IGWL-----

-DD---N--G-M-----FSFNNAKYKTSEEEYPD---DKTKLEK--AKN-LYSLC-

----EKV-----NTA---EVSD-----GKEGCERSLLA-KCLIENSS

K---M-----

-----

-----GFV---VQ-----

-----  
-----  
-----  
-----  
-----  
-----  
-----  
-----  
-----  
-----

-----

>Dple-OBP3\_DPOGS207885\_EHJ67765\_AB\_DpOBP9\_DPGLEAN10496\_

-----  
-----  
-----  
-----  
-----  
-----

-----MTAE-----QKQM-VHQHFEQ  
VGMECIKTH-----EITA-E-----DV---TNLR-TRKI-----  
--PT-----GE-NASCFLSCIFKH--VGIM-----  
-DD--N--G-L-----LQKESAIELAKKVFDD----EEELKL--IED-YLHSC-  
----SSV-----NTA---TVSD-----GEKGCERSLLAY-KCMIENAS  
Q--F-----

-----  
-----GID---L-----  
-----  
-----  
-----  
-----  
-----  
-----  
-----  
-----  
-----  
-----

>Dple-OBP4\_DPOGS207878\_EHJ67766\_AB\_DpOBP11\_DPGLEAN10492\_  
-----



-----  
-----  
-----  
-----MMSL-----  
-----KYL--FVF--GV-----L  
AVSLRSAR-----A---ISDE-----DRNK-IHTAVLP  
HVAECSANF-----GVTE-D-----DI---KAAK-EAGT-----  
-----LGTFNPCLMGCVLKK--IQVI-----  
-DD--K--G-L-----FDADKAVELSNKYFSD----EADKKK--AEE-IITTC-  
----KAV-----NDK---EVGD-----GEKGCERAGLLF-QCFLPFKD  
A---F-----  
-----  
-----IN-----  
-----  
-----  
-----  
-----  
-----  
-----  
-----  
-----  
-----  
-----  
-----  
-----  
-----  
-----

>Dple-OBP5\_DPOGS207877\_EHJ65653\_AB\_DpOBP14\_DPGLEAN06527\_

-----  
-----

-----

-----

-----

-----

-----M-----TRQQ-IKNSSKM

LKKNCMGKN-----DVTE-D-----MV---GEID-KGKF-----

---IE-----DK-NVMCIYCIYQM--SQLV-----

-KN-----N-K-----LNYEASIKQVDLMFPP-----DMKEA--MKA-SIENC-

----KDI-----SKK---YKDI-----CEASYWTA-KCIYDDNP

K---N-----

-----

-----FIFA-----

-----

-----

-----

-----

-----

-----

-----

-----

-----

>Dple-OBP6\_DPOGS207886\_EHJ65655\_AB\_DpOBP18\_DPGLEAN06528\_

-----

-----

-----

-----  
-----  
-----M--YIL-----AV  
VKFLAALT-----I--CEAM-----TMKQ-IKSTGKM  
MRKTCQPKN-----NVAD-D-----KI---DDIG-TGVF-----  
---IE-----ER-EVMCYVACIMKM--ANAI-----  
-KN-----N-K-----LNYEAAIKQADLLLPD-----EIKEP--TKE-AITAC-  
----RKV-----ADS---YKDI-----CEASFHVT-KCIYNHNP  
S---I-----

-----  
-----FFFP-----

-----  
>Dple-OBP7\_DPOGS207876\_EHJ65654\_AB\_DpOBP16\_DPGLEAN06526\_

-----  
-----  
-----M-----TRAQ-LKKTMTI  
MKNQCMPKH-----NVNN-D-----KV---GQIE-QGVF-----  
--IE-----DH-DVMCYIACIYKT--IQVV-----  
-KN-----N-R-----LDKDLISKQIDALYPP-----ELKES--TKE-AVSKC-  
----IKE-----QAK---YEDP-----CAGIFYAC-KCLYEDNP  
A---N-----

-----  
-----FIFP-----  
-----  
-----  
-----  
-----  
-----  
-----  
-----  
-----  
-----  
-----  
-----

>Dple-OBP8\_DPOGS208192\_ABPX\_EHJ75781\_AB\_DpOBP20\_DPGLEAN20037\_  
-----  
-----  
-----  
-----  
-----

-----  
-----MAELAKM  
LRDNCLEET-----GADV-A-----LI---DKVN-QGATL-----  
---MP-----DG-KLKCYIKCVMET--AGMM-----  
-SG-----G-E-----VDVEAVVAVLPE-----ELQRH---AD-TMRAC-  
----GTK-----RGL-----DD-----CDTAFLTQ-ACWQAGCP  
K---D-----

-----  
-----YILI-----  
-----  
-----  
-----  
-----  
-----  
-----  
-----  
-----  
-----  
-----  
-----  
-----

>Dple-  
OBP14\_DPOGS205435\_combinedwithDPOGS205437\_EHJ74349\_AB\_DpOBP32\_DPGLEAN2  
2247\_

-----  
-----  
-----  
-----  
-----MNTWSI-----LFTL-----

-----TII--LLG--TI---NCYKHSKY  
LTKSLDSE-----PSLS-----ILYA-RDKKSDT  
ITNECLMEM-----YPRN-----LYKY-PLHI-----  
-----DRNDIPCIHCVLKK--FGIM-----  
-SN---D--G-I-----INIRNYYRRVQAIHRY-----DPRVL--ISD-VGETC-  
----AQN-----ING-MNLDHDV-----CKKAKVFN-DCTQLYVI  
SYKDL-----

-----  
-----ED-----  
-----  
-----  
-----  
-----  
-----  
-----  
-----  
-----  
-----  
-----  
-----

>Dple-  
OBP15\_DPOGS205438\_sameasDPOGS205436\_EHJ74350\_AB\_DpOBP33\_DPGLEAN22248\_

-----  
-----  
-----  
-----  
-----  
-----

-----MYA-HEKISDM

VAQQCLTEM-----YPKG-----KKIE---L-----

-----QESDESCIHYCVLK--FGII-----

-NG---N-G-Q-----FNLDIYRKRVQMAHQL-----DSRNL--MND-KGGAC-

----VES-----AEA-TQHkQDV-----CKKAKVFN-DCTHLyRM

I--F-----

-----

-----

-----

-----

-----

-----

-----

-----

-----

-----

-----

>Dple-OBP16\_DPOGS205439\_EHJ74351\_AB\_DpOBP34\_DPgleAN22249\_

-----

-----

-----

-----

-----

-----MQLYVFLC-----

-----LIG-HVL--AS-----KS

HGYSGTLV-----D---FTDP-----KVQG-HLDALVR

---PI-----TR-SGQCFAACMMEQ--SDVI-----

-----LDS-----IEG---MSDR-----CQLASTYN-DCLNENMI

-----

VRKMPFH LIQPK-----

-----

-----

-----

---

-----

-----

-----

-----

-----

---

-----

-----

-----

-----

NLTDCARQV-----KASM-I-----DV---EHFL-KRIP-----



---QS-----SM-QGKCFVACILKR--NSII-----

-VN-----N-K-----ISRENLEANRAVYGQ---DSEVMTR--LNT-AIVEC-

-----SDV-----VEG----IFEV-----CEYSSVFN-DCMHMKME

H-I-----

-----LDK---VTMERRM

EALGQMTSDPDVWTDDEILKLIKDEL-----

>Dple-OBP18\_DPOGS216124\_EHJ64212\_AB\_DpOBP35\_DPGLEAN1205\_

-----MFLRFLFPLMFFVYVE

TDQAVENNRMGVDTVHDIKIDKDTIITRNM-----

-----NLK--KKNEKSS---EAQIEQK

NVSPDWSY-----S---SFPE-----DVKK-HVDQFKR

NMSECLKEV-----HASD-K-----RP---VKRL-SPKK-----

---ES-----PV-HGDCLIACVLKR--NSVI-----

-EN-----G-K-----IHKENLIALVKKFYEK---DEKLMKK--LER-NLDRC-

----IET-----SAR---DKDD-----CAIAARLN-ECTNDIMT

S--N-----

-----

-----KHK---IVVNY--

-----

-----

-----

-----

-----

-----

-----

-----

-----

>Dple-OBP19\_DPOGS203084\_EHJ68962\_AB\_DpOBP37\_DPGLEAN13103\_

-----

-----

-----

-----

-----MPLY-----

-----GVH--PYV-----K

LSPERFYL-----W---TDSP-----IYAV-VHKTLSM

TARSCMVSA-----NASE-V-----DL---E-PL-REDP-----

---PF-----PE-KSACILNCLLEK--INIV-----

-KS-----G-K-----FSKSGFMTTISPLVFT---NKKKMDH--MKT-VSENC-

-----DKE-----VNH---DVSS-----CELANEIT-SCIYKYAP

E---L-----

-----

-----HFK---N-----

-----

-----

-----

-----

-----

-----

-----

-----

-----

>Dple-OBP20\_DPOGS212737\_EHJ78968\_AB\_DpOBP38\_DPGLEAN10161\_

-----

-----

-----

-----

-----MRVLVVAAVTL-----

-----ITI--TLT--RCVPRTDKMQNNV

KDLTSTTP-----N--SMEE-----QMDK-ISNDLRP

VMAECNETF-----RIEM-Y-----YL---E-TL-NTTGSFP---

---EE-----LDRTPKCFLRCVLEK--AEVA-----

-SA---D--S-Q-----FDVSRTADVFDQIRVL-----PHDD--LVK-MATTC-

-----SDR-----AET-----C-----K---CERAYQYL-KCLMGMI

N---K-----

-----

-----YDT---T-----

-----

-----

-----

-----

-----

-----

-----

-----

-----

>Dple-

OBP1\_DPOGS207879\_DUPLEX\_EHJ67764\_EHJ67763\_AB\_DpOBP7\_DPGLEAN10494\_AB  
\_DpOBP8\_DPGLEAN10493\_

-----

-----

-----

-----MECSKDYPLTDEDIAQLKDK

QFPDKDDVRCLFACAYKKTGMMDDQGKLSVD-----

-----GVNNLAKKYFSDDQDKLQKSQKF

TEACAGVNDEAVTDGEKGCERAALIYKCSIEQA---SQGL-----TDEE-VKKEFIK

EVMTCTKDI-----TVDM-F-----DL----MELE-QLKV-----

---PT-----KT-NVKCVLACAYKR--VGTM-----

-NK---E--G-K-----YDIKEAYKISSETMMKG---DDKRIEN--GKK-LADLC-

----SKV-----NEA---DVRD-----GNKGCERAALLF-KCVIENAP

K--L-----

-----

-----GFK---V-----

-----

-----

-----

-----

-----

-----

-----

-----

-----

>Dple-OBP9\_DPOGS203667\_EHJ74653\_AB\_DpOBP21\_DPGLEAN11049\_

-----

-----

-----

-----

-----MPSL-----

-----SLL--LYL-----AM

LTLCYGAK-----EKPE-----LSEE-IKEIIQH

VHNECVGKT-----GVAE-E-----DI---ANCE-NGIF-----

---KE-----DM-KLKCYMFCLLEE--GSLV-----

-DD---D--G-N-----VDYDMMVSLIPD-----QYTDR--VLN-MINGC-

----KHLVLSISCDDS---ETSG-----MQVPLEAP-KPSSSPSA

P---H-----

-----

-----PRRGLSDDIGPVEN

TPRIFA-----

-----

-----

-----

-----

-----

-----

-----

-----

>Dple-OBP10\_DPOGS201921\_EHJ66992\_AB\_DpOBP5\_DPGLEAN08164\_

-----

-----

-----

-----

-----MKFL-----

-----VLI-CVC-----

AIFISRSN-----A---QNAH-----LTSA-QKEKVKQ

YTAECIRES-----GVKH-E-----VL----ADAK-KGNL-----

---NE-----DE-GLKRFIFCFFQK--SGIV-----

-TA---D--A-K-----LNMEVALSKLPKD-----IDKVA--AGK-VLSEC-

----KNK-----NGK-----NH-----ADTAFQIF-KCYHKATK

Q---H-----

-----

-----VLF---E-----

-----

-----

-----

-----

-----

-----

-----

-----

-----

>Dple-OBP11\_DPOGS214842\_EHJ69393\_AB\_DpOBP30\_DPGLEAN14493\_

-----

-----

-----

-----

-----MSTK-----

-----FYC--ILA-----IV

LFFVQVR-----NTAS-----ITNY-KSPLIAE

YVEHCLRES-----RANP-E-----HI---IFLK-NGVIH-----

---SP-----NY-ALKNWLLCYLSR--TGVM-----

-SP--E--G-V-----LKQHVVMKKVAK-----QDKDL--VEK-IIDKC-

----LFK-----TPH-----EP-----VDTAWKYL-TCFRKRQP

Q---Y-----

-----

-----ARE---INHI---

-----  
-----  
-----  
-----  
-----  
-----  
-----  
-----  
-----

>Dple-OBP12\_DPOGS214841\_EHJ69392\_AB\_DpOBP31\_DPGLEAN14492\_

-----  
-----  
-----  
-----

-----MKTf-----

-----IVL--AAI--LV-----

-----AAQA-----LTDE-QKQKLNK

HKSECLAEF-----KPDE-Q-----LV---EKLK-AGDFK-----

---TE-----NE-PLKKYVLCMLMK--SELM-----

-TK---E--G-K-----FKKDVALAKVPNP-----EDKPA--VEK-LIDAC-

----LAN-----KGN-----TP-----QQTAWNYA-KCYHEKDP

N---H-----

-----

-----SIF---Q-----

-----



-----  
-----  
-----  
-----  
-----  
-----  
-----  
-----

>Dple-OBP13\_DPOGS209054\_EHJ75212\_AB\_DpOBP29\_DPGLEAN13901\_

-----  
-----  
-----

-----MCYWISTTGRDSEDDVVRILPSDVYKTND  
EYRHIWSPVHGDAVV FVRPLL FHRLVVVLLQ-----  
-----VSL--QLS--QDDMLTLLVLL  
LHQVTTES-----K--SFMP-----LGKA-ERAMFLS  
HSEACLEQS-----GAER-A-----QV---ERLV-GGAP-----  
---ED-----SP-ALRRHVLCVLRR--CKLL-----  
-RK---D--G-R-----LDKHALRDRISA-----SN--DTK-ILEGC-  
----SDQ-----SGD-----TP-----EDLA WHLF-RCGLNKKV  
---L-----

-----  
-----FEHMTAAAPNEA--  
-----  
-----

-----  
-----  
-----  
-----  
-----  
-----  
-----

>Dple-OBP27\_DPOGS208339\_EHJ75008\_AB\_DpOBP26\_DPGLEAN03483\_

-----  
-----  
-----

-----MEEEISNALQDCSQLNDKLNK  
VNIEKRQRRHNDFRYYAFRIDANSKQEINQY-----  
-----NHE--RRN--TS-----TE  
NDKNINGN-----D--SGIN-----FSRY-PYGGIEE  
DLINSGNRQ-----TIDDDR-----KS---NLKQ-QSRFKRN--E  
PLVSK-----DD-VDKCLSQC VFAN--LQVV-----  
-DS--K--G-I-----PREAMLWNKIQSSVTS-----EQSETL--MRE-QIRSC-  
----FQE-----LQS---ESEDN-----G---CVYSNRLE-RCLMLHIS  
D--R-----

-----

-----NRN-----STQ

TYTTSIK-----

-----  
-----

-----  
-----  
-----  
-----  
-----  
-----

>Dple-  
OBP21\_DPOGS210117\_sameasDPOGS210118\_EHJ65319\_AB\_DpOBP39\_DPGLEAN12415\_

-----  
-----  
-----  
-----

-----MVS KISVLL-----

-----CCI--YVF--GISLSDSAISADS

ESRCRNPP-----T---APQK-----IERV-ITLCQDE

IKLSILREA-----LDVIKEE-----HT---MPAQ-RRRNKRE--V

PFTHD-----EKRIAGCLLQCVYRK--VKAV-----

-DG---Y--G-F-----PTLEGLVGLYSDGVNE----RGYFMA--VLE-ASREC-

LMKNHDLF-----SRT---VPMD-----NGRNC DV SFNIF-ECISDRIG

E---Y-----

-----

-----CGN-----SGL

-----  
-----  
-----  
-----

-----  
-----  
-----  
-----  
-----

>Dple-OBP23\_DPOGS209968\_EHJ77172\_AB\_DpOBP41\_DPGLEAN05855\_

-----  
-----  
-----  
-----

-----MMKY-----

-----LFV--LIC--LS-----IA

TCEADDI-----ASPV-LCGVTPN

AIYQCLGTP-----KVVK-K-----EA---SSQC-D-----

-----SDLGECEKMSCIFSK--SGWM-----

-KD-----N-K-----VDKEEFAAHFDQFAKE---NPDWKVA--VEH-MKSNC-

----LSS-----DLP---PQGV-----H---LNCPAYDVMICAFANFI

---K-----

-----

-----GAPAS--QWSSSSH

CEYPRRFAASCPVCPTACFASAIPIGSCNACLSLPRSP-----

-----  
-----  
-----  
-----

-----  
-----  
-----  
-----

>Dple-OBP24\_DPOGS201299\_EHJ67714\_

-----  
-----  
-----  
-----

-----MAEM-----

-----THL--LTL--FV-----LF

LMSTVSTA-----D---EVDE-----SCFE-LFDPEEP

EQECCETDF-----ETDD-----EV---EYEE-DFSDCPT---

--DFS-----TDEGKCDTIKCYYPKH--DGVW-----

-KD-----D-D-----IDDEAVKTKLQSIDSK----NPPAQRA--AER-ILKHC-

----LNG-----KYM---KYGT-----D---DACPAMKYFLCSYINTV

---V-----

-----

-----ECD---SWNKTET

CAKHSEYASKCKVSLG-----

-----  
-----  
-----  
-----  
-----

-----  
-----  
-----

>Dple-OBP25\_DPOGS202589\_EHJ67714\_AB\_DpOBP42\_AB\_DpOBP43\_DPGLEAN20949\_

-----  
-----  
-----

-----MLNLLRIALFIVAVNADLLNHERTKGATLKPISVCCDIPELGDPKP

LAECSNMKLQGPCSDVQCVFEKSGFLLDKQT-----

-----LNK--EGYRNHLMKWLEGHKEWK

DGIEKAISDCVDVDLRQYLDYPCKAYDVFTCTG---IAMLKVVLSDVPPHCR-GPPPGGA

NPSDCCKLP-----KVFTEE-----DF---KECG-IEKPTKE---

-----RRVPECSKQICLLKR--YELM-----

-KD---D--T-N-----VDKDAVA AFLDKYSEG---DEDTQSA--VEA-TKQKC-

----LNN-----DLP---NIP-----EICEPSKIVFCVAGSML

---M-----

-----

-----NCP---KWDESED

CQKLKDH FENCNKYFPKK-----

-----  
-----  
-----  
-----  
-----  
-----

-----

-----

>HmelGOBP1\_HMEL004625\_AB\_HmOBP1\_

-----

-----

-----

-----

-----M-----

-----IS--LLT--LS-----LA

CGVLTG-L-----D--ATME-----VMKD-VTLGFGE

ALQSCREES-----QLTE-D-----KM---E-EF-FHFWRDD--F

--KFE-----DR-EVGCAMKCMSSH--FNLL-----

-TD---S--H-R-----MHHENTDKFIKSFPNG---E-VLSKR--MIS-IIHTC-

----EQQ-----FDA---LE-D-----H---CWRILRIA-ECFKVACK

K---E-----

-----

-----GIA---PTMELLM

AEFIMEADP-----

-----

-----

-----

-----

-----

-S-----

-----

-----

>HmelGOBP2\_HMEL022500\_mod\_AB\_HmOBP2\_

-----

-----

-----

-----

-----MAVR-----

-----CY--VVVFLAL-----LA

LATLPR-V-----R---STAE-----VMSH-VTAHFGK

SLEECREES-----GLSS-D-----IL---D-EF-QHFWSEE--F

--QVV-----HR-ELGCAIICMSNK--FLLM-----

-HD---D--A-R-----MHHVNMHDYIKSFPQG---E-LLSEK--MVN-LIHNC-

----EKQ-----FDD---IE-D-----E---CSRVVKVA-ACFKESAK

E---E-----

-----

-----GIA---PEVAMIE

AVLEKY-----

-----

-----

-----

-----

-----

-----

-----

-----



>HmelPBP\_C\_HMEL016107\_AB\_HmOBP6\_

-----  
-----  
-----  
-----  
-----MF--KR-----  
-----L--T---VV-----VL  
VFVGLN-K-----V---TSNE-----TLRG-ITASFLK  
VLEECRQEL-----NIGD-N-----VL----A-DM-YYFWKLD--R  
--TLI-----HR-DTGCAIVCMSKK--LNLL-----  
-DT---S--G-K-----LHHGNAEEFALQHGA---D-DMAKK--LVT-TVHEC-  
----EQK-----HEL---EE-D-----Q---CLRALEIA-KCFRGAMH  
E---I-----  
-----  
-----NWA---PKVDVAI  
SEILTEV-----  
-----  
-----  
-----  
-----  
-----  
-----  
-----  
-----  
-----

>HmelPBP\_D\_HMEL016108\_AB\_HmOBP3\_

-----  
-----  
-----  
-----  
-----MA-VQKW---QL-----  
-----I--L---VM-----CV  
LMQACK-V-----S---PSQE-----IMHK-LTKGFAT  
AFEQCKQEL-----NLGD-N-----IM---Q-DF-LNYWREE--Y  
--ELL-----NR-DTGCAIMCMAQK--HDLL-----  
-TE---D---G-----IHHEKVHGFTKSHGAD---D-ELAKQ--LVT-MIHEC-  
----EKS-----NAG---VS-D-----E---CMKTLEVA-KCFRTKIH  
E---L-----  
-----  
-----KWA---PDMETIL  
EEIMTD-----  
-----  
-----I-----  
-----  
-----  
-----  
-----  
-----  
-----  
-----  
-----  
>Hmel-OBP3\_HMEL005621\_AB\_HmOBP35\_  
-----

-----MVGLKALHDIQINKDTIITRNM-----  
-----NLK--TDN--KI-----SH  
NHDPDWSY-----S---SFPK-----EVKS-HVEQFKR  
NMSECLKEV-----QLND-K-----RQ---VRRL-SPKK-----  
--ES-----PV-HGECLIACVLKR--NGVI-----  
-EN-----G-K-----IYKDNLLSLVRKFYGK---DEKLMKK--LEK-NVDRC-  
----IEA-----SVK---NKDD-----CTVASYN-ECTNDLMA  
N---N-----  
  
-----KHK---IIVNY--

>Hmel-OBP6\_HMEL007173\_sameasHMEL022532\_AB\_HmOBP32\_

-----  
-----  
-----MENISYKG--KLFL-----  
-----LFI--AFA--HVTLVDSYSH-KF  
FSQNLDT-----PSLS-----IQYA-RDKKSDM  
ITNECLTEM-----YPKN-----IYRY-PLHI-----  
-----DRNDVPCIIHCVLKK--FGIM-----  
-SN---D--G-V-----INTRNYYRRVRAIHRY-----DPRVL--ISD-VGETC-  
----AQN-----ING-MNLDHDV-----CKKAKVFN-DCTQLYAI  
SYRES-----

-----  
-----DD-----

-----  
-----  
-----  
-----  
-----  
-----  
-----  
-----  
-----  
-----  
-----  
-----

>Hmel-OBP7\_HMEL007174\_AB\_HmOBP33\_

-----  
-----  
-----



-----MLIHAVLA-----  
-----LIG--YTL-AA-----QH  
RSFSGTMV-----D---LSDP-----KVQG-HLDALVR  
MAQSCVIKV-----RASP-K-----DV---RAYF-TNSP-----  
--PI----TR-SGQCFAACMLEQ--SDVI-----  
-NH-----G-K-----VNRELLVHLAGLVNGK---NSRVVRK--LYG-ISRLC-  
----LDS-----IEG---MSDR-----CQLASTYN-DCLNENMI  
E---F-----  
  
-----AFP---LDIAEEA  
VRKMPFHLIQPK-----  
  
-----  
-----  
-----  
-----  
-----  
-----  
-----  
-----  
-----  
-----  
-----  
-----  
-----

>Hmel-OBP12\_HMEL008322\_AB\_HmOBP38\_  
-----  
-----  
-----  
-----  
-----

-----MKIIIIITLAL-----

-----LTF--SVA--QCGSSVGCRMSTD  
DITTTTMA-----T---TMED-----DDAR-SNFDVMS  
VMVDCNDTF-----RVEM-S-----YL---E-SL-NKSGSFP---  
---DE-----TDKTPKCFVRCVLEK--SDIV-----  
-SG---D--S-Q-----FNVTRTAEVFSQIRDT-----SQND--IIK-MATAC-  
----SDR-----PEK-----C-----K---CERSYQYL-KCLLETTI  
E---I-----

-----  
-----NEM---KSSK---  
-----  
-----  
-----  
-----  
-----  
-----  
-----  
-----  
-----  
-----  
-----

>Hmel-OBP13\_HMEL008689\_ABPX\_AB\_HmOBP20\_

-----  
-----  
-----  
-----  
-----MQGF-----  
-----IVH--CSI-----

--FVFFFG-----D--SQGM-----TDDE-MREEFMR



---PT-----KK-DVKCLLACAYKK--TGSM-----

-----AKV-----NDE---TVSD-----GEAGCDRAGLIF-KCVVENAP

---

-----KNN-----

-----

---

---

-----

---

-----A--ITDE-----QKAM-IHSHFEM

LGKECIKDN-----LISA-D-----DI---KNLR-AKKI-----

---PS-----GE-NAPCFLACMFKK--LGIM-----

-DD---A--G-L-----LQKETVLDLARKVFND----EDEIKL--IGD-YLHSC-

----SHI----NTE---SVGD-----GDKGCDRSMMA Y-KCMIENAS

Q-V-----

-----

-----LFT---FN-----

-----

---

---

>Hmel-OBP16\_HMEL010227\_AB\_HmOBP12\_

-----

---

---

-----MFLI-----

-----VLI-F-----

-----Q-----G--YSDE-----ERTK-IYATMLP

HILQCSTEY-----GITE-D-----EL---KASK-ENЕК-----

-----FGSINPCFMGCIFKK--IHVI-----

-NK---E--G-I-----FNVEKAEKLSENFLVH----DEDKKK--ASA-VIKAC-

----ATI-----NDE---DVSD-----GEKGCDRAKLLF-ECLLPFRQ

Q--V-----

-----

-----ILK---LIMCIEK

ATKT-----

-----

-----

-----

-----

-----

-----

-----

-----

>Hmel-OBP17\_HMEL010228\_AB\_HmOBP11\_

-----

-----

-----

-----

-----MTSL-----

-----QLV--FLV--FG-----VV

AVSLGSVS-----A---FSDE-----ERNK-IYAGMLP

LVLECSKDY-----GLTE-D-----DL---KAAK-ESGS-----

-----IGSINPCLMACVFKK--INVI-----

-ND---K--G-L-----FDVDKAGELSQKFLTE-----TDDQQK--ATE-IIKTC-

----ASV-----NEK---DVSD-----AEKGCDRSKLLF-DCLLPFKG

Q--V-----

-----

-----KYN---IVIIILII

YSSR-----

-----

-----

-----

-----

-----

-----

-----

-----

>Hmel-OBP18\_HMEL010229\_AB\_HmOBP14\_

-----

-----

-----

-----

-----

-----

-----M-----TRQQ-LKNSSKL

LKKNCMAKN-----DVTE-D-----LV---GDIE-KGKF-----

--IE-----DQ-KVMCYIACIYQM--SQLV-----

-KN-----N-K-----LNVEASIKQVDMMFPP-----EMKDA--TKA-SIENC-

----KDV-----SKK---YKDL-----CEASFWTA-KCLYEDNP

K---N-----

-----

-----FFFA-----

-----

-----

-----

-----

-----

-----

-----

-----

-----

>Hmel-OBP19\_HMEL010230\_AB\_HmOBP16\_

-----

-----

-----

-----

-----

-----

-----M-----TRPQ-LKKTLTI

MKNQCMPKH-----RVTN-E-----KV----GQIE-QGVF-----

---VE-----DH-DVMCYIACVYKT--AQVV-----

-KN-----K-R-----LDKDLVSKQIDILYPA-----EIREA--VKL-STVKC-

----IPV-----QYN---YEDE-----CEGIFYSV-KCLYEDNP

A---N-----

-----  
-----FIFP-----

-----  
-----  
-----  
-----  
-----  
-----  
-----  
-----  
-----  
-----  
-----

>Hmel-OBP20\_HMEL010231\_AB\_HmOBP17\_  
-----  
-----  
-----  
-----  
-----  
-----  
-----

-----M-----TRQQ-LKNSGKL  
MKKSCMPKN-----DVTE-D-----QI----GQIE-QGKF-----  
--LE-----ER-NVMCYIACVYTM--TQVV-----  
-KN-----N-K-----LNYEATIKQVDLMFPP-----DMKDA--VKA-AVEHC-  
----KDI-----SKK----YKDI-----CEVSYWTA-KCMYDFDP  
N---N-----  
-----

-----FVFP-----

-----

-----

-----

-----

-----

-----

-----

-----

-----

>Hmel-OBP21\_HMEL010232\_AB\_HmOBP18\_

-----

-----

-----

-----

-----

-----

-----M-----TMKQ-IKNTGKM

MRKTCQPKN-----NVAD-E-----KI----DPLN-KGEF-----

---IE-----EK-EVMCYVACIMKM--ANTI-----

-KN-----N-K-----LNYEAAIKQADMLFPD-----EIKEP--AKE-AITAC-

----RKV-----VDD---YKDL-----CESSFYTT-KCIYNYP

S---I-----

-----

-----FFFP-----

-----  
-----  
-----  
-----  
-----  
-----  
-----  
-----  
-----

>Hmel-OBP22\_HMEL012883\_AB\_HmOBP36\_

-----  
-----  
-----  
-----

-----MGNSIKKDEEQHAMFRIKF-----

-----YYI--VIF--LIIFTAFILVMAF

TPLTKDEQ-----I---DKFN-----KMNE-GVEPFRR

NLTECARQV-----KASM-V-----DV----ENFL-KRIP-----

---QT-----SL-QGKCFVACILKR--NSII-----

-KN-----N-K-----ILKENLLEANKAVYGE---DSEVLSR--LKL-AINEC-

----SDV-----VAN---IFEI-----CEFSSVFN-DCMHMKME

H---I-----

-----

-----LDK---VIMERRM

EALGQMTGDPDVWTDEEDELKLVKDEL-----



-----  
-----  
-----  
-----  
-----  
-----  
-----  
-----

>Hmel-OBP23\_HMEL013351\_AB\_HmOBP21\_

-----  
-----  
-----  
-----

-----MQSA-----

-----ALLAAVFL-----A-L

ITFGFGQK-----EKPE-----FSEE-IKEIIQH

VHNECVAKT-----EVTE-E-----DI---ANCE-NGIF-----

---KE-----DI-KLKCYMFCLLEE--GSLV-----

-DE---N--D-N-----VDYDMMISLIPE-----QYTDR--VSK-MITAC-

----KHL-----DTP---DKNK-----CQRAFDVH-KCSYDSDP

K---V-----

-----

-----NF-----

-----

-----

-----  
-----  
-----  
-----  
-----  
-----  
-----

>Hmel-OBP36\_HMEL006421\_sameasHMEL017002\_AB\_HmOBP37\_

-----  
-----  
-----  
-----

-----MSSVVKPHLRLESP-----

-----FIQINCYPLLTI RRPRNWIRQLA

VNNWQDIC-----NERVLENP-----IAAM-IHKSLTA

VAHSCMEKI-----NGTE-E-----DL---E-YL-RKDP-----

---PF-----PE-KSACIIVCLLKK--IGVV-----

-KD-----D-N-----FSKTGFVTA VTPLVFH---NRKKLEH--MKN-VSEKC-

----DKE-----ITT---PEDT-----CQLGNSIT-ACIFKYAP

E--L-----

-----

-----HYK---T-----

-----

-----

-----

-----  
-----  
-----  
-----  
-----  
-----

>Hmel-OBP39\_HMEL022521\_AB\_HmOBP19\_

-----  
-----  
-----  
-----  
-----  
-----

-----AR-----SETE-IKKWFIQ  
QAVECSKEH-----PVTG-E-----EL---QQMKTCHKI-----  
--PE-----SM-SAKCLVACIFKR--IEWI-----  
-DE---K--G-M-----FVKEKAYKTSEKDYLN---DQVKLDK--AKE-LYESC-  
----SKV-----NSE---TVTD-----GEKGCERSNLLA-ICLTESAA  
Q---V-----

-----  
-----RLV---KS-----  
-----  
-----  
-----  
-----

-----  
-----  
-----  
-----  
-----

>Hmel-OBP43\_HMEL022602\_AB\_HmOBP8\_

-----  
-----  
-----  
-----  
-----  
-----

-----KYAE

IIMTCAKDY-----PITP-E-----DI---EQLK-NSKL-----

--PD-----NAKCLFACAYKT--SGMM-----

-DD---Q--G-K-----LSVEGVNKL AHTFLAD---DPERLKK--AEQ-FTDAC-

----KSV-----NEE---EVSD-----GDKGCERAALIF-KCSIEKAP

QVINN-----

-----

-----KIE---M-----

-----  
-----  
-----  
-----  
-----

-----  
-----  
-----  
-----

>Hmel-OBP2\_HMEL003711\_AB\_HmOBP13\_

-----  
-----  
-----  
-----

-----MSIL-----

-----LCF--LFL-----

SIALIDGK-----T--VNIP-----VDPD-ITSQLVQ

ISADCIASN-----GLTE-E-----VL---KQVM-EWKL-----

---EN-----NE-PTKKLLFCFGTK--LNTT-----

-DK--N-G-H-----VILNEALKLAVS-----KKRPV--FGD-AIKRC-

----NDQ-----EGS-----DK-----YDTLFKII-ICMRDQEN

I--F-----

-----

-----LRF-----

-----

-----

-----

-----

-----

-----

>Hmel-OBP4\_HMEL006095\_AB\_HmOBP29\_

-----MAVM-----

-----MVM-SAV---VS-----AMV

VHQVITQY-----IYFKQIKN-----LGKD-EKAMFRA

HSEACLPQS-----QVDP-K-----LL---DNLL-QGEL-----

---VE-----DA-ALKRHVYCVLLK--CKVI-----

-SK---D--G-K-----LQKTAVLGKMAHR-----ADSKN--ITK-VLERC-

----ADQ-----PGD-----TP-----EELAWNLF-RCGYNKKA

V---L-----

-----FDYMPAQVNDGADN

DG-----

>Hmel-OBP9\_HMEL007611\_AB\_HmOBP30\_

-----  
-----  
-----  
-----

-----MLVF-----

-----ILF--SAH-----

---NMEN-----KCDE-----DVSP-TCVPSVD

PIEECIEKL-----HVNR-A-----LV---EKLK-SGNSK-----

---LF-----DK-NLKRWLLCFFEK--TCVM-----

-TP---D--G-V-----LRQDVVLKDIPD-----QDKSK--IEK-ITSIC-

----LYQ-----KLH-----FA-----VDTAWNYL-NCFREKDP

K---Y-----

-----

-----SVI---ANKI---

-----  
-----  
-----  
-----  
-----  
-----  
-----  
-----  
-----  
-----

>Hmel-OBP10\_HMEL007612\_

[illegible]



[illegible]

-----

-----

-----MRAV-----

-----WCL--LAV-----

SLAVVSGK-----VLD-TLVI-----VPPE-RVPGIVQ

ASSKCIEEM-----NLDK-D-----TM---QKFF-SWQL-----

---GD-----SE-STRKMYCLGVK--SGYI-----

-AD---D--G-S-----MVKKEVLGLAG-----SHGGN--IDG-VIDEC-

----NNL-----KYS-----DK-----YEAVFKIV-MCFHEKSK

L--E-----

-----

-----FKV-----

-----

-----

-----

-----

-----

-----

-----

-----

-----

>Hmel-OBP25\_HMEL015916\_AB\_HmOBP24\_

-----

-----

-----

-----  
-----  
-----  
-----TII-----LPPA-RAFDIVQ  
ASSKCIEEL-----NLEK-N-----IL---QKYL-AWEL-----  
---SD-----CE-STRKMYCLGTQ--SGYI-----  
-AN---D--G-S-----IVKNKAFEVVG-----SHRNR--VNG-IIDEC-  
----HEF-----KHN-----DK-----YEAVYRNV-MCFNKKSR  
L---H-----

-----  
-----FKV-----

-----  
>Hmel-OBP26\_HMEL015917\_AB\_HmOBP22\_  
-----  
-----  
-----  
-----

-----

-----

-----IVI-----LPPA-RVPGIAQ

ASSKCIEEL-----NLEK-D-----TL---QKFL-AWEL-----

---SD-----SE-STRKYVYCLGTE--SGYM-----

-AK---D--G-S-----IHKNEVLEVVG-----NHRNR--VDG-VIDEC-

----NER-----KYN-----DK-----YEAVFHNV-ICFNEKSG

L---H-----

-----

-----FKF-----

-----

-----

-----

-----

-----

-----

-----

-----

-----

>Hmel-OBP27\_HMEL015918\_AB\_HmOBP23\_

-----

-----

-----

-----

-----MDTGKMRAV-----

-----WCL--FLV-----  
TLATVYAG-----NVKVEYVD-----IPKD-YIPAVEK  
ASFECIKKL-----KLEEEQI-----SL----QGFL-NWEL-----  
--SE-----SD-NTKKYIFCLANG--SGFF-----  
-AD---D--G-S-----ILKDKVLAIMG-----KYRDR--VDK-VIDEC-  
----SKV-----KYD-----NK-----YEEVYRME-VCFRDLSG  
L---Y-----

-----  
-----FRM-----  
-----  
-----  
-----  
-----  
-----  
-----  
-----  
-----  
-----  
-----  
-----

>Hmel-OBP28\_HMEL015920\_AB\_HmOBP27\_

-----  
-----  
-----  
-----  
-----MNTL-----  
-----WFF--LFL-----

SIALVKGK-----ALFH-----VPPE-YAGEILK  
AAADCIDST-----GAGV-D-----AV----QKVI-SANL-----  
--EN-----TE-PFKKFLYCFSSK--SGYV-----  
-DS--D--G-H-----FIVDQMTKLIGNH-----KDKAK--FID-NLNLC-  
----NKS-----EGG-----NT-----IDTIYQIA-VCFKDNSP

I--Y-----

-----

-----FTV-----

-----

-----

-----

-----

-----

-----

-----

-----

-----

>Hmel-OBP29\_HMEL015921\_

-----

-----

-----

-----

-----MKTF-----

-----WCF--LFL-----

SIALVSGR-----AIVN-----VSQE-FTGDILK

TAVDCTDSS-----GAGV-D-----AL----QKMA-SANF-----  
---ED-----TE-PFKKFLYCFASN--SGYV-----  
-DS--D--G-H-----FIMDKMTKLIGNH-----KDKAK--YVD-AINLC-  
----NKR-----KGG-----RT-----IDTIYELA-NCFKDHSP

I--Y-----

-----

-----FTL-----

-----

-----

-----

-----

-----

-----

-----

-----

-----

-----

>Hmel-OBP30\_HMEL015922\_

-----

-----

-----

-----

-----

-----

-----MFD-----IPKE-FVPDIK

ASAECADKL-----GLDTLN-----IL----SKFF-SGEL-----

```

---KD-----SE-SVRQYMYCLGTT--SGYV-----
-ND--D-G-R-----LNKDRLGKVVG-----EHKSK--VES-VVDEC-
----NKA-----KAS-----DK-----YETVYKAV-VCFRENSG
L---Q-----
-----
-----FKI-----
-----
-----
-----
-----
-----
-----
-----
-----
-----
-----
-----
>Hmel-OBP31_HMEL015923_
-----
-----
-----
-----
-----MLMR-----
-----KNP--ICI-----YI
SIIYLGVQ-----YVLVEYIK-----VPKE-FIDDAIN
GSGQCAEEL-----GLPG-D-----TL---NKLL-SNNF-----
--ED-----SQ-AMRKYYICLGIA-LDVG-----
```



-DG---T--G-----SLKHSLSKYASND-----RRKAE--ITK-TIDEC-

----NKE-----KAS-----DK-----YEKAYKVS-TCYLNTSS

V---Q-----

-----

-----FKV-----

-----

-----

-----

-----

-----

-----

-----

-----

-----

>Hmel-OBP32\_HMEL015924\_AB\_HmOBP10\_

-----

-----

-----

-----

-----

-----

-----TYFK-----IPKE-FIEDAIK

GSVHCTEEL-----GLPV-D-----TL---NMFL-SDNF-----

---ED-----SP-TMRKYIYCLGLA--VDVS-----

-EE---D--G-----SLKHSLSKYANND-----KRKAE--VIQ-RVDEC-

----NKQ-----EAN-----DK-----YEKVKVS-TCYLNTSS

V---Q-----

-----

-----FKV-----

-----

-----

-----

-----

-----

-----

-----

-----

-----

>Hmel-OBP33\_HMEL015925\_AB\_HmOBP23\_HMEL015918\_

-----

-----

-----

-----

-----

-----

-----AYIK-----VGKE-FTEDAIK

GSVHCTDEL-----KLPV-E-----TL---QTFL-TSKY-----

---ED-----SL-PMRKYIYCLGIM--LDVG-----

-DE---N--G-----NLKHSLSKYAGNN-----KRKAE--ILE-TIDEC-

----NKL-----EAS-----DK-----YEKALKVS-TCYLNKSS

L---L-----

-----

-----FEIKKD-----

-----

-----

-----

-----

-----

-----

-----

-----

-----

>Hmel-OBP34\_HMEL015927\_AB\_HmOBP15\_

-----

-----

-----

-----

-----

-----

-----AYIK-----VGKE-FTEDAIK

GSVHCTDEL-----GLPV-D-----TL---QTFL-TSKY-----

---ED-----SP-LMRKYIYCLGIM--LDVG-----

-EE---D--G-----SLKHSLSKYAGND-----KRKVE--VLK-TIDEC-

----NKL-----EAS-----DK-----YEKAIKVS-TCYLNKSP

L---L-----

-----  
-----FEIKKD-----

-----  
-----  
-----  
-----  
-----  
-----  
-----  
-----  
-----  
-----  
-----

>Hmel-OBP35\_HMEL015928\_AB\_HmOBP5\_

-----  
-----  
-----  
-----

-----MKVL-----

-----IIC--VGL-----

---FALIE-----A---HNIH-----LSHG-QKEKVKE

YAAECMKES-----GAKP-E-----VL----ADAK-KGHL-----

---VD-----DE-GLKKFILCFFQK--TGVL-----

-SS---D--A-K-----LNTDVALSKLPAG-----IDKVT--AAK-VLNDC-

----KNK-----KGA-----TH-----ADTAFEIF-KCYYTHTK

Q---H-----

-----

-----ILF---EK-----

-----

-----

-----

-----

-----

-----

-----

-----

-----

>Hmel-OBP37\_HMEL018118\_

-----

-----

-----

-----

-----

-----

-----IIA-----MPPA-RISRIVM

ASSKCIEEL-----NLEK-D-----TM---QKFF-AWQL-----

---SD-----SE-STRKYTYCLGTG--SGYI-----

-DS--D--G-S-----IIKNEVLDIVG-----SHRDR--VNA-IIDEC-

----NKS-----KYN-----DK-----YETAFRSV-MCFNEKSG

L---Q-----

-----

-----FKV-----

-----  
-----  
-----  
-----  
-----  
-----  
-----  
-----  
-----  
-----

>Hmel-OBP41\_HMEL022561\_

-----  
-----  
-----  
-----  
-----  
-----  
-----  
-----  
-----

---YLKES-----AAKS-K-----IL---ANTN-KRHL-----

---ID-----YEEL-----

-SS--D--D-K-----LNTDIALCLKLPA-----KVT--AAK-VFND-

---ENK---QGA---TR-----AYTAFEIC-NVTTLHN

QLLYL-----

-----  
-----  
-----  
-----

-----  
-----  
-----  
-----  
-----  
-----  
-----  
-----

>Hmel-OBP42\_HMEL022573\_

-----  
-----  
-----  
-----  
-----  
-----

-----YAGVILK

AAADCIEST-----GVGA-D-----AV---QKVI-AANL-----

---EN-----TE-PFKKFLYCFSSK--SGYV-----

-DG---D--G-H-----LIVDQMIKLVGNH-----KDKAK--FID-VINLC-

----NKS-----KGG-----NT-----LDTMFQTT-VCFKQNSP

I--Y-----

-----

-----LTL-----

-----

-----

-----  
-----  
-----  
-----  
-----  
-----  
-----

>Hmel-OBP1\_HMEL003176\_AB\_HmOBP41\_

-----  
-----  
-----  
-----

-----MSVR-----

-----VLF--IFI--IV-----TA

CQANIQV-----SPPV-TCGYLPR

AIHECIGSP-----HIVK-P-----EI---SAQC-S-----

-----KSISECERMTCVFQK--SGWM-----

-SG-----N-A-----VDKDKVKSYFDQFSTD----NPQWALA--VNH-VKAAC-

----LNM-----DLP---SQGV-----Y---LNCPAYDILTCVFSGFI

---K-----

-----

-----NAQPD--QWSSSES

CSYPRQFASACPYCPSDCFAAQVPIGSCNACLALPRSP-----

-----  
-----



-----  
-----  
-----  
-----  
-----  
-----

>Hmel-OBP5\_HMEL006666\_AB\_HmOBP43\_

-----  
-----  
-----  
-----

-----MLRI-----

-----PLV--AIF-----

-----ILK

PISACCDIP-----EMGDVG-----PL---SECS-NP-----

-----RLPGPCNEVQCVFEK--SGFL-----

-ID--K--Q-T-----LNKEAYRAHLRQWVEG---HKGWEDA--VEK-AIKDC-

----VDR-----DLR---QYLD-----NPCKAYDVFTCTGIAML

---K-----

-----

-----VRK-----

-----  
-----  
-----  
-----

-----  
-----  
-----  
-----  
-----

>Hmel-OBP38\_HMEL022514\_AB\_HmOBP40\_

-----  
-----  
-----  
-----

-----EF-----

-----IQP--KWR-----TD

CGFKLKWD-----DINR-LSIFNES

DVTTTTTEA-----TSLRNK-----DV---K-----

-----IVPLPCDKQNCIFSK--LNIT-----

-ND-----G-V-----IDKDAFSRLLDTMTHR---HTQWTS--KAK-VVTQC-

----LNK-----PLL---GYE-----EDCEINRILACTYDILT

---E-----

-----

-----VCY-----

-----

-----

-----

-----

-----

-----  
-----  
-----  
-----

>Hmel-OBP40\_HMEL022553\_AB\_HmOBP42\_

-----  
-----  
-----  
-----

-----MHQT-----

-----VVF--CLL--IF-----QV

VTAEPPPP-----QCRG-PPAGLQK

NPKECCKFP-----KVFKEE-----DF----KECG-IEKPSEE--D

GSFHH-----RGPPDCDKQICLLQI--NNLM-----

-KD--D--T-T-----IDKDAVTAFMQKWGDA---NGDFKDA--VDV-AIDRC-

----VKG-----DLP---GPP-----ELCEATKMIFCIGSTMF

---M-----

-----

-----NCP----KWEDTDD

CKKVKEHIEECKPYFN-----

-----  
-----  
-----  
-----  
-----

-----  
-----  
-----

>Hmel-OBP45\_HMEL009897\_AB\_HmOBP39\_

-----  
-----  
-----  
-----

-----MVQRISALL-----

-----WCL--YIF--SISLSDSAISAET

ETRCRNPP-----T--APQK-----IERV-ISLCQEE

IKLSILREA-----LDVIKEE-----HT----MPAQ-RRRNKRE--V

PFTHD-----EKRIAGCLLQCVYRK--VKAV-----

-DG---Y--G-F-----PTLEGLVGLYSDGVNE----RGYFMA--VLE-ASREC-

LMRNHDKF-----SRT---VPMD-----NGRNCDISFDIF-ECISDRIG

E---Y-----

-----

-----CGN-----SGL

-----  
-----  
-----  
-----  
-----  
-----  
-----

>Bany-OBP\_CN1\_GW3I2KR01B64MG\_35Frame3

-----DRRTGV-----

-----RMF--RNV--FL-----ML

CSVSVG-L-----Y---ADVE-----VMKD-VTLGFGE

ALQHCREES-----QLSE-D-----KM---E-EF-FHFWRDD--F

--KFE-----DR-ELGCAIKCMSAH--YDLL-----

-TD---S--H-R-----MHHENTDRFIKSFPNG----E-VLSQQ--MVQ-LIHEC-

----EQQ-----HDA---EE-D-----H--CWRILRVA-ECFKGACQ

R--H-----

-----GIA---PTMEMLM

AEFIMEAESRTSTALVD--FTSLRNIIYTSILIIYKAEFVCLFERANLINYWSDLKNYFS

ARPIYRGRLAIYYPSIPTGPRTRVKPRGVSYHKL TNGLDTKAGRIHPFFVFGILMRNF

DLEFRTLRFSSSGMHIVSSARIRYVREEFVQFENKNVFAGGSPPYRQRRTTKRFRVPYDV

VWIFIPLLTSPAFLDCIT-----

----IRDQSQGL-----TC-----

-----KEK

RK-----

-----

>Bany-OBP\_CN2\_GZKG99Z02D6PVR\_35Frame1

-----

-----

-----

-----

-----

-----

-----

-----

-----CAIMCMAS---IRPI-----

-AD---D--M-S-----LHHQNAHEFAKTHGAD----D-DMAKQ--LVN-MLHDC-

----EKV-----HDS----IV-D-----N---CSKTLEIS-KCFRTKIH

E---L-----

-----

-----KWA----PSMEEIL

EEVMTEVMIENWLEITRLNDVFLYSRFANRQMVLGNHNIVRGHSRFIVFKITV--LNTKG

RRKQKYNI-----DSLHNLVVNISNLNTGQSSGNLLQ

-----KKTRKT-TSKALITKWLDYITRNNTNDIILYL-----

-----VEYNP-----YIISHNNFIEVV-----

-----

-----ASYFR-----

-----

-----

-----

>Bany-OBP\_CN3\_GE679317\_35Frame2

-----  
-----  
-----  
-----  
-----SSGQRRVAITAGDRYNNMATRARWR-----  
-----FLA--V---VV-----FV  
VTHGHR-A-----I---ASQE-----IMKK-LTTGFSK  
ALEECKQEM-----GFGE-H-----IM---K-DF-YNWYKED--Y  
--ELL-----NR-ETGCAIMCMASK--FDLI-----  
-AD---D--M-S-----LHHQNAHEFAKTHGAD---D-DMAKQ--LVN-MLHDC-  
----EKV-----HDS---IV-D-----N---CSKTLEIS-KCFRTKIH  
E---L-----  
-----  
-----KWA---PSMEEIL  
EEVMTEVMIENWLEITRLNDVFLYSRFAN-QMVLGNHNIARGHSRFSFILSFLRHLYLIQ  
KADASRNIIILLRHLYLIQKADASRNIIILSFFFLNLICYPNVLVDSLTFGSQNLINRYR  
ITLVRVVVTCCKKTRKTLTSKALTTKLILYCTYLVEYNPYMHLRITQLYRGGRFVFQFVS  
TVMLIWFRDGSVKLLESYKTKLYFP-----YYVPHYGLTNIISLKICLCVLDILF  
IFNELEIIVKHIAIELQRLLKTPITTAFRSTAAMSLHFTLASCLTMLSETTYLLCLWR  
LRSFGRENGAAYFNMRGLNCLSAAAKTVGLRAPAVYDNIFCFGQHLYVF-----LV  
KVFDTRSNSMIIC-----LLNVFHCNLMIACLLNVFHCNSMITCTLSLQLPNNTTNCLMF  
YGFKYLTLLPATCQIAFRLFNPHVLCVFVWVNVNQTSIWCTDKKKTLLIPLSLPLSYRNH  
STVGKYLDITLPLQFHHFKRNIILYL

>Bany-OBP\_CN4\_GE686547\_53Frame2

-----  
-----  
-----  
-----  
-----QTNNRTNEDYGRTTYLR-----  
-----LVG--R---YF-----TF  
VNNMGT-S-----Y---SFPR-----NHEE-TNHRVSK  
ALEECKQEM-----GFGE-H-----IM---K-DF-YNWYWKED--Y  
--ELL-----NR-ETGCAIMCMASK--FDLI-----  
-AD---D--M-S-----LHHQNAHEFAKTHGAD---D-DMAKQ--LVN-MLHDC-  
----EKV-----HDS---IV-D-----N---CSKTLEIS-KCFRTKIH  
E---L-----  
-----  
-----KWA---PSMEEIL  
EEVMTEVMIENWLEITRLNDVFLYSRFPN---ISSLDVGTKSYCRSIFIYRF--DNCSY  
KRPTQAEIY-----FLVTFGSQLINRYRIILGRVVVTC  
-----CKKHAKPLLKPLLNDLYYIVPSIPLHLTFTYH-----K  
LIISRWSLRISVCLLNGYANMVMRW-----VSIMIRKLQNIIFSILCSSLWPHY  
PVKDLFMCFRYSFHIVEDYRKAYLSHRVTTSTREDTTHHYLPINCG-----DIAT  
LHISFVLAYYVERNVIYGAYEVLVAKTALHILIVEDLTNVLVLQKILKSACVELSVCDML  
FVLDSISSTYFLVTQFKLVLSRTYLILVVTQFKFVFSRTYFIVTQFKLVLYNNPSS----  
----YQITRRPACFMDFRNIRFSQQLVRHLGYLILMYCVYFKWCGMLTNKQVFGIQKKKI  
ITKKK-----  
>Bany-OBP\_CN5\_GE680338\_53Frame3  
-----



-----  
-----XLRPGV  
KRHCGHYGRGSPSLSNM-----IVPN-----  
-----YCG--GFL-----VL  
VLYFIHFP-----S---NYAM-----TRQQ-LKNSGKL  
MKKSCMPKN-----EVTE-E-----QI---GQIE-QGKF-----  
--IE-----ER-NVMCYVACVYSM--TQVV-----  
-KN-----N-K-----LNHEAIIKQVDMMFPP-----DMRDA--VKV-AVENC-  
----KDI-----GKK---YKDI-----CEASYWTA-KCMYDYDP  
K---N-----  
-----  
-----FVFPCNNNTYFKKE  
KKEKK-----  
-----  
-----  
-----  
-----  
-----  
-----  
-----  
-----  
-----

>Bany-OBP\_CN6\_GS8R7LM03EULY6\_53Frame1  
-----  
-----

[illegible]

-----

-----YQRRVAITAGEIDTENTE-----

-----MFK--VVPIVVF-----LF

ISISIN-E-----I--TTNE-----TMKN-ITSGFLK

VLDDCKHEL-----NLSE-N-----VL----A-DM-YHFWKAD--H

--ALL-----HR-DTGCAIVCMSKK--LNLL-----

-DT---S--G-K-----LHHGNAQEFVNHGAA----S-DMASK--LVS-VVHEC-

----EQK-----HDA----EE-D-----P---CLRALEIA-KCFREVMH

E---M-----

-----

-----NWA----PRMDIII

SEVLTEIINEETKRIINKEVKRMKHANKQTSYVTYNIFLSRLFFGIVNVYCLFIFYFLNP

LFNFFINNFYFCNFMFIVVLSYFYPGKTNWDTVMIPGSISYKLNYSFLLYIYFGYLLQLH

MTSMYCMLQRPSFLEFFRILNKNQICVHIYIK-----

-----

-----

-----

-----

-----

-----

>Bany-OBP\_CN8\_GW3I2KR01AEGGI\_53Frame1

-----

-----

-----

-----

-----

-----

-----FCK

VLDDVSMSL-----NAKT-Y-----PIXTTSGSGS---

--RFA-----PP-RHRVRHRMHEQK--AEPA-----

-RY---S--G-K-----LHHGNAQEFAVNHGAA----S-DMASK--LVS-VVHEC-

----EQK-----HDA---EE-D-----P---CLRALEIA-KCFREVMH

E---M-----

-----

-----NWA---PRMDIII

SEVLTEIINETKRIINKEVNVSMQISKEVNIRLLTKIFFVGYFLELVILCLLLYLVNSDT

PGKRIG-----ILLFPGSISYKLNYSFLLYIYFGYLLQLH

MTSMYCMLQRPSFLEFFRILNKKSNLRTY-----

-----

-----

-----

-----

-----

-----

>Bany-OBP\_CN9\_GE686922\_35Frame1

-----

-----

-----

-----

-AASDMASKLVSVVHECEQKHDAGEDPCLRA-----

-----LEI--AKC--FR-----EV  
MHEMNWAP-----R---MDII-----ISE--VLTEIHK  
LKNRNNKRS-----KTYEA-CK-----AN---K-LI-LGYLLKY--F  
FKVIF-----WNSRLLFIYILFFES--FVRF-----  
-PS---Y--M-S-----TNLLNVLSILKVFFLI---L-IKDGQ--LMS-TNQGA-  
----RAI-----ADV---DQ-S-----R---PTNWGKRS-VGGARRLR  
S---S-----  
-----  
-----RAS---FEILELL  
KSVIKLRKVNKICYCAKRKFYFHTGLNLTPLFNFFINNFYFCYFMFIVVLSYFYPRKTNW  
D-----  
-----  
-----TVVIPCLFHINNITVSYCIFTLITYCSYIRVCI  
VCCNGRASWNRILN-----  
-----  
-----  
-----  
-----

>Bany-OBP\_CN10\_GW3I2KR01E2YNH\_53Frame3

-----  
-----  
-----  
-----  
-----  
-----

-----  
----NDSF-----RVEM-S-----YL---A-SF-NKSGSFP---  
--DE-----TDKTPKCFMRCVLEK--SGVA-----  
-SP--A--S-Q-----FNVKRTAEIFPQIRDI-----AEED--IVK-IATEC-  
----TDR-----PET-----C-----K--CERSYQYL-KCLMETVI  
E--I-----  
-----  
-----YDV---KNNFPIF  
GFPNKHTYPLL-----LLFFHGKIYKTLLKIKK--ICYYNRFIINFFILMCTYSNV  
KSIKRK-----  
-----  
-----  
-----  
-----  
-----  
-----  
-----  
-----  
-----

>Bany-OBP\_CN11\_GE680903\_35Frame3

-----  
-----  
-----  
-----  
-----  
-----  
-----

-----YDSL-----RRGG-N-----VT---AGSF-NKSGSFP---

---DE-----TDKTPKCFMRCVLEK--SGVA-----

-SP---A--S-Q-----FNVKRTAEIFPQIRDI-----AEED--IVK-IATEC-

----TDR-----PET-----C-----K---CERSYQYL-KCLMETVI

E---I-----

-----

-----YDV---KIKPFPS

LVVPICILITASAFVFFPIYLFVLFNFKQKIYKTLLKFIKKNVTIHALFSIFDLYCNVHI

KAMFKNIKKKNFSINKYTGRYFKNYLFYVMSFLYNLYRLGNKHCNSLKSPLINKSLLNH-

-----

-----

-----

-----

-----

-----

-----

>Bany-OBP\_CN12\_GS8R7LM03EMD3J\_53Frame2

-----

-----

-----

-----

-----AITAGERPLRPGEE-----

-----AMS--ILI-----AV

VKFLALT-----L---CDAM-----TMKQ-IKSTGKM

MRKTCQPKI-----NVAD-E-----KI---DPLN-EGVF-----

---IE-----EK-EVMCYIACIMKM--ANAV-----

-KN-----N-K-----LNYEAAMKQADILFPE-----EIKQP--AKD-AITAC-

----RKV-----ADS---YKDI-----CEASFFVT-KCIYNHNP

A---I-----

-----

-----FYFPLLNLWHKGKK

K-----

-----

-----

-----

-----

-----

-----

-----

-----

>Bany-OBP\_CN13\_GE678549\_53Frame3

-----

-----

-----

-----PLRPGSYK

SESVTKLKIRVGAIVYCSELNKIYKSMSNTF-----

-----WFF--AFL-----

SVALVNGK-----K--ATVT-----IPPE-YAGELIT

ASVDCVRDT-----GVDP-D-----ML---NQIV-QWKL-----

---QE-----ND-NVKKFIFCVATA--TGYG-----



-DS---D--G-H-----VVVDKAEKLLSNH-----KKKEE--FKN-ILKEC-

----NKI-----SGS-----DK-----YDTLYKTA-KCNREKQP

I--V-----

-----

-----FSLKKLRVAYEGIN

KMKTQGCLLTSKFSLNKGLCLREINI-KILRKE-----

-----

-----

-----

-----

-----

-----

-----

-----

>Bany-OBP\_CN14\_GS8R7LM02B1WGH\_53Frame1

-----

-----

-----

-----LRPGRSHYGYLVSKLL

SSIVLNYIKHKINKINKINKINKYKTMSNTF-----

-----WLF--AFL-----

SVVTVYGK-----R--ATVT-----IPPE-YAAELVT

ASVGCVRNT-----GVDP-N-----IL---DQIV-QWNF-----

---QE-----TD-NVKKFIYCMSLA--SGFG-----

-DS---D--G-H-----LIIDKVARLVSDSN-----KKKDE--LIN-ALKEC-

-----NTL-----SGS-----DK-----YDTLFKTV-KCNREKQP

I--V-----

-----

-----FSFIYLKHIAMNT

TGGFCCLLRRYYQNQVSSYLKGCVWKTIKGSKKK-----

-----

-----

-----

-----

-----

-----

-----

-----

>Bany-OBP\_CN15\_GE680950\_35Frame2

YGRGNGFGLRAEKQRNIDAAMTSAALLVFLFLVSFGHGAKESRNLARKSKEIIQHVHNE  
C

VDKSSVSTQSGHYGRGRNKGITPLHLRRCLCFCSSFRLVTERKKSRNLARKSKKYNMFT  
T

SVSIKPPRRTRIAKTAYLRRTHYLRLRGGETKEYRRRYDICGAACVSVPRFVWSRSEKA

GTRGNQRNNTTCSQRVCRNRSNRGGHSELKRKHIGGHKIEVLHVLFTGRRESCCWQCFY  
S

TNASLWEKSSSNKYLLRGEKQRNIDAAMTSA-----

-----ALL--VFL-----F-L

VSFGHGAK-----EKPE-----LSEE-IKEIIQH

VHNECVDKT-----GVTE-E-----DI---ANCE-NGIF-----

--KE-----DT-KLKCYSMFCLEE--GSLV-----

-DD---D--G-N-----VDYDMMISLIPE-----KYTDR--VGK-MINAC-

-----KHL-----DTP---DKDS-----CQRAFDVH-KCSYAADP

N---F-----

-----

-----YFLFYSTNASLWEK

SSSNKYVLNIFAWFKKKKKKKKLCVNCFKCCINRVYCIYYIKCNNNRNLVKKEK-----

-----

-----

-----

-----

-----

-----

-----

-----

>Bany-OBP\_CN16\_GS8R7LM03C9PJO\_35Frame1

-----

-----

-----

-----

-----

-----

-----

-----

-----

-----

-----HDS---IV-D-----N---CSKTLEIS-KCFRTKIH

E---L-----  
-----  
-----KWA---PSMEEIL  
EEVMTEVMIENWLEITRLNDVFLYSRFANRQMVLGNHNIARGHSRFSFILYFL--VNI--  
-----IWESINKILNLNTGRSSDNLLQ  
-----KTRKT-TCKALITK-LDYITRNNTNDIILYLVEYNPYIISHNNYFKVV  
ASYFSLSPKRLCYGLDEMGQLNYDKVTKLNYIFHIMFLTMA SLILLASERFVYVFIFFSY  
LMSRLSSIFRPLSYNVYRRHHSSLLPSDKLWRYRYTSHFRASLLCTKR-----NLWR  
LRNFGRENGAAYFN SMRGLNCLSAAAKT VSLRAPAVYDNIFCFGQHLYVFLSNSMIACL  
V  
NVFDTRSNSMIVC-----LLNVFHCNLMIACLLDVFHCNSMIACTLSLQLPNNTTTYLMF  
YGFKYLTLLPATCQIAFRLFNPHVLCVFVWVNVNQTSVWYTKKKNYKYGK-----  
-----  
>Bany-OBP\_CN17\_GS8R7LM02B5M46\_35Frame1  
-----  
-----  
-----  
-----  
-----ITAGVSTQSGHYGRDCEKARGTMASC-----  
-----WY--VMV--VV-----VM  
SMVSRP-V-----A--GTAE-----VMSH-VTAHFGK  
SLEE CREES-----GLSP-E-----IL---E-EF-QHFWSED--F  
--EVV-----HR-ELGCALICMSNK--FSLM-----  
-ED---D--A-R-----MHHVNMHDYIKSF PKG---E-LLSAK--MVE-LIHNC-  
-----EQE-----YDD----IK-D-----D---CSR VVKVA-ACFKVSAK  
D---E-----

-----  
-----GIA----PEVAMIE  
AVLEKYVHGIKSRTLIFYFSFSH--VTRATDLQFFFYSLQVSSLQSHLMVSDDAIDESRQT  
CVEDENLYPFRFLHDIVLERIAWRYVVFVGRVVTSHGQSLPPARPGPIKKTSISPAGNRTQ  
DLRLLNSPRTPLRYGGRQKCNCTVLSNRNFNQNHKNCTIKTVKNCRSVGYITYYYFEITII  
RITNFLFNRSFRRIEKKCTQLYYNNHFPFLCYCYLLRLVSKLTDVIITIVIDFENELDFH  
KNNL-----VFIFSLQNEKFTIHYLVHLYCKLWTKGLNN---IVLSNLYVKIDY  
RINFVRNRDYGESLRENGHFGILIKKQFKIKKKKKEKLCV-----

-D-----

-----

-----

>Bany-OBP\_CN18\_GE654902\_53Frame2

-----

-----

-----

-----

-----VSTQSGHYAAITAGGEKARGTMASC-----

-----WY--IMV--VV-----VM

SLVSRP-V-----A---GTAE-----VMSH-VTAHFGK

SLEECREES-----GLSP-E-----IL---E-EF-QHFWSED--F

--EVV-----HR-ELGCALICMSNK--FSLM-----

-ED---D--A-R-----MHHVNMHDYIKSFPKG---E-LLSAK--MVE-LIHNC-

----EQE-----YDD---IK-D-----D---CSRVVKVA-ACFKVSAK

D---E-----

-----

-----GIA----PEVAMIE  
AVLEKYVHGIKSRTLFYFSFFKYNLQTFSFNCAVLIVQFSSLSELESPRRMRGVRPIVHH  
AGPMRIGKHAENENSLVCRFPHDIFLHRLRHVIFFLKMHTTEKLECMPTREFEPTPFGI-  
-----GGRGHIHWAITARYSLILSKFQSKSLEKLYSNCKKLPVCKLHNLLLKQLFVSLN  
FCNLI-----KVFEDSNAPNKCNTTMIIFHSFVIAIY--DLVNQRSELLSI  
LNKMNWTSTKIISYNLANIYFQPFKKLRKVYNLSSALNL-LIMDRPEYCAKYMQKIIDD  
RISLYETETMANHCMKT-DTDLVYRSNLKIKKEKKKLCVD-----

-T-----

-----

-----

>Bany-OBP\_CN19\_GS8R7LM02B0493\_53Frame1

-----

-----

-----

-----

-----

-----GH--YGR-----

-----G-----R--ESAR-----YHGV-VLVHYGG

DGDVYGVQT-----SGRY-S-----GD----E-PC-YCAFREI--F

--RRV-----SR-RVGSLTRDSGRV--PTFL-----

-ER--G--L-RGGAPAGLCPHLHVNMHDYIKSFPKG---E-LLSAK--MVE-LIHNC-

----EQE-----YDD----IK-D-----D---CSRVVKVA-ACFKVSAK

D---E-----

-----

-----GIA----PEVAMIE

AVLEKYVHGIKSRTLFYFSFFKYNLQTFSFNCAVLIVQFSSLSELESPLRMKVRPIVHH  
AGPMRIGRLYTRRELRKLSGFLTIFSFTVDTYFNFLKCTQLKSWRCMPRTGFETTPSGI-

-----GGRGHIHWDITARYSLILSKFQSKSLEKLYSNKKLPVCRLQP

ITITIICITSFRRIEKKCTQLYDNNHFPFLCYFYLLRLVSKLTEVITIVIDFDYYELVFH

KNNL-----VQFSKHLFSAFYKTKENLQFIICTFIVNYVLKAILCVTYMQKYIID

DRISLETETTANHCMKT-DTDLVYRSNLKLKKKKKKICVY-----

-H-----

-----

-----

>Bany-OBP\_CN20\_GE680902\_53Frame3

-----

-----

-----

FFFVTTSPCREWVICAPAAFLGCGSRFSGSLSGIEFPVTRDNHGSRRNYHRKLIRQTFE

RCVERRVAITAGGISTMNRNMNFVYAITFAL-----

-----ITF--SVT--ECATKEKDKPNNA

KVETTTAS-----V---SVEE-----RDKS-EEFNLME

VMVECNDSF-----RVEM-S-----YL---A-SF-NKSGSFP---

---DE-----TDKTPKCFMRCVLEK--SGVA-----

-SP---A--S-Q-----FNVKRTAEIFPQIRDI-----AEED--IVK-IATEC-

----TDR-----PET-----C-----K--CERSYQYL-KCLMETVI

E---I-----

-----

-----YDV---KNTFAIF

GFPNKHIYPPLLFSLIYLFVLFNFKQKIYKTLLKFKKKIVILIALFSIFDFILMCAYSNV

KSKKEK-----

-----

-----

-----

-----

-----

-----

-----

>Bany-OBP\_CN21\_GE660702\_53Frame2

-----

-----

-----

-----

-----AITAGDTISDIQ-----

-----EDT--RVFYKMFIKKLFFYNFVI

LITFCNFN-----N---IHAK-----NADD-LKQNFMH

ILMECAKDY-----PITG-D-----DV----EQFK-NKQV-----

---PD-----NE-NMRCLLACAYKK--TGMM-----

-DD---Q--G-M-----LSVEGVNKYTQEYLGD----DSNKLEK--AHD-FTDVC-

----KSV-----NDV----SVSD-----GSKGCDRAALMF-KCSVDKAA

E---F-----

-----

-----GFD----IVLYNPI

REEKELAHLERRIYAEPKTQIVIKLDIVCNVLYLLLRLSCIHLLLLQLYQIDHLDGKLNW

QMRIIEPLKLIIFYIAFKNTAFYIIDFIFDAFLMLSCQLFSLLYKSMLGIVSIQFLLLLN



IFKGKNIKIQLAVCISLFYLVTLVCFKLIMAISSCVLKISTRNPFNTTGTVNSFFNY  
YYVFVVGIKTNIEVVKKKEKRK-----

-----  
-----  
-----  
-----  
-----

>Bany-OBP\_CN22\_GS8R7LM03DK2TO\_35Frame1

-----  
-----  
-----  
-----

-----YLRSGVFVVVKSSVTYWSFV-----

-----VWY--VMV--VV-----VM

SMVSRP-V-----A--GTAE-----VMSH-VTAHFGK

SLEECREES-----GLSP-E-----IL---E-EF-QHFWSED--F

--EVV-----HR-ELGCALICMSNK--FSLM-----

-ED---D--A-R-----MHHVNMHDYIKSFPKG---E-LLSAK--MVE-LIHNC-

----EQE-----YDD----IK-D-----D---CSRVVKVA-ACFKVSAK

D---E-----

-----

-----GIA---PEVAMIE

AVLEKY-IHQIGNSIPDLILLFSSCNPGYRPSVFFTLYKLALDYNLTWSVMTQSRWKRAN

LLGGGNPYPPRFQHDIVLERIAWRYVFVDRVVTSHGQRPTSQTWTNNLNRPSWGSNPGP

-

-----PSHTTAPRRPSKVLRSFNTVLSNRIFIKIFRKTQVQFKLKKTAGLVVPITITIIC

ITKFLYFNRSFRRIEKKCTQLYNNNHFPSLCYCYLLRLVSKLTEVI--IVINFENELEFH

KNNL-----IHLANIYFQAFYKTKKSLQFIICTFIVNYVLKAILCVTYMQKYIID

DRISLETETTANHCIE--GT-----TRIVITKKKDXXX-----

-X-----

-----

-----

>Bany-OBP\_CN23\_GS8R7LM03D9HP1\_53Frame2

-----

-----

-----

-----

-----

-----EKD--TEL--TPEQRREEQSKYG

IFFDDDDYN-----Y--LQHL-----KDTR-EEFNLME

VMVECNDSF-----RVEM-S-----YL----A-SF-NKSGSFP---

---DE-----TDKTPKCFMRCVLEK--SGVA-----

-SP---A--S-Q-----FNVKRTAEIFPQIRDI-----AEED--IVK-IATEC-

----TDR-----PET-----C-----K--CERSYQYL-KCLMETVI

E---I-----

-----

-----YDV---KIKPFQS

LVVPICILTLPFPLLLLFSSNFFLILKVLKNIQNTVKIYKKKLLLSLYFQFLIYT----

-----

-----

-----

-----  
-----  
-----  
-----  
-----

>Bany-OBP\_CN24\_GW3I2KR01A0OH8\_53Frame3

-----  
-----  
-----  
-----

-----TAGGHCQSRTGRKLCDRRTGV-----

-----RMF--RNV--FL-----ML

CSVSVG-L-----Y---ADVE-----VMKD-VTLGFGE

ALQHCREES-----QLSE-D-----KM---E-EF-FHFWRDD--F

--KFE-----DR-ELGCAIKCMSAH--YDLL-----

-TD--S--H-R-----MHHENTDRFIKSFPNG---E-VLSQQ--MVQ-LIHEC-

----EQQ-----HDA---EE-D-----H--CWRILRVA-ECFKGACQ

R---H-----

-----

-----GIA---PTMEMLM

AEFIMEAESRTTTALVSLHFTSKYHLYFYTNISRVLNALISGTTGPIKIISVLDSPFIEG

YYP-----TGARTTRVKPRGVSYYHKL TNGLDTKAGRIHPFFVFVILMRNF

DLEFRTLRFSSSGMYIVSSARIRYVREEFVQFENKNVLAGGSPPYRQRRTTKQFRVPYDV

VWIFIPLLTSPAFILDCIITDYQVRLRANLRKRKKNVHVRHLMVFYIDFMHVSFRTLKTD

SENVGIRKYVKGVYAAGLNVNLLRTSGRPHHLREKLKNTCMFIMETDAWSTHYSHNPG  
LI

YLKYVAIQTRLPEPVVYTSLLMHGTVSGTTTKYTTSKYFYTYAAPIVCNVHIKAMFKNI

KE-----

-----

-----

>Bany-OBP\_CN25\_GW3I2KR01AJ48K\_53Frame3

-----

-----

-----

-----

-----XXXITAGDCEKARGTMASC-----

-----WY--VMV--VV-----VM

SMVSRP-V-----A--GTAE-----VMSH-VTAHFGK

SLEECREES-----GLSP-E-----IL---E-EF-QHALYQE--L

SQRAV-----ISKDGRTNTLARVRH--QGLQ-----

-PR--GEGGGV-----LQSERQGRNRSSGYD---RSGLRKV--LSS-LVGNIP

DLILLFFV-----PSDLQFLRSFN-----CTVFIIARVSSQNERG

A---N-----

-----

-----SPPRWPNADWQTLH

TQRIKETLWCAGFHTIFSFTVDTYFNFLKCTQLKSWSVCRGPDSNLRPPESEAEVIFTG-

-----

-----LSRLGTVLSNRNFNQNHKNCTVKIEKKLPVCRLHNLLLNNNY

SYHFFVISKFSKNRMKKCTQLYYNNHFPFLCYCYLLRQVSKTEVIIVINFEN-----

-----

-----

---

---

---

[illegible]

--KFE-----DR-ELGCAIKCMSAH--YDLL-----

-TD---S--H-R-----MHHENTDRFIKSFPNG---E-VLSHT--FF-----

[illegible]

-----

>Bany-OBP\_CN27\_GZKG99Z02C1ZKR\_53Frame3

XXXT-----

-----

-----

-----

-----IYGPGVNRLLVRPSMTSA-----

-----ALL--VFL-----F-L

VSFGHGAK-----EKPE-----LSEE-IKEIIQH

VHNECVDKT-----GVTE-E-----DI---ANCE-NGIF-----

---KE-----DT-KLKCYMFCLLEE--GSLV-----

-DD---D--G-N-----VDYDMMISLIPE-----KYTDR--VGK-MINAC-

----KHL-----DTP---DKDS-----CQRAFDVH-KCSYAADP

K---F-----

-----

-----YLLF-STLLMLADW

EKSYKILF-----

-----

-----

-----

-----

-----

-----

-----

-----

>Bany-OBP\_CN28\_GE681934\_35Frame2

-----  
-----  
-----  
-----YGRGQ  
LQSYRRYEVQSSIVLSI---KKYKSMFNTF-----  
-----WFF--AFL-----  
SVALVNGK-----K---ATVT-----IPPE-YAGELIT  
ASVDCVRDT-----GVDP-D-----ML---NQIV-QWKL-----  
---QE-----ND-NVKKFIFCVATA--TGYG-----  
-DS---D--G-H-----VVVDKAEKLLSNSH-----KKKEE--FKN-ILKEC-  
----NKI-----SGS-----DK-----YDTLYKTA-KCNREKQP  
I---V-----  
-----  
-----FSLKKLGVYQNEVD  
AR-----LSSDFQVFKRVVFRGNKLNNIVNIT-----  
-----  
-----  
-----  
-----  
-----  
-----  
-----  
-----  
-----

>Bany-OBP\_CN29\_GE684370\_53Frame2

-----

-----

-----

-----

-----

-----

-----

-----

---

-----M---V-E-----LIHNC-----

-----EQE-----YDD----IK-D-----D---CSRVVKVA-ACFKVSAK

D---E-----

---

-----GIA-----PEVAMIE

AVLEKY-----

---

-----

---

-----

---

-----

-----

---

-----

\_\_\_\_\_



>Bany-OBP\_CN30\_GE679318\_35Frame1

-----  
-----  
-----  
-----  
-----  
-----  
-----

-----LED--Y

--ELL-----NR-ETGCAIMCMASK--FDLI-----

-AD---D--M-S-----LHHQNAHEFAKTHGAD---D-DMAKQ--LVN-MLHDC-

----EKV-----HDS---IV-D-----N---CSKTLEIS-KCFRTKIH

E---L-----

-----

-----KWA---PSMEEIL

EEVMTEVMIENWLEITRLNDVFLYSRFANRQMVLGNHNIARGHSRFSFILYFL--VNI--

-----IWESINKILNLNTGRSSDNLLQ

-----KTRKT-TCKALITK-LDYIT-----

-----

-----

-----

-----

-----

-----

>Bany-OBP\_CN31\_GW3I2KR01B8IJW\_53Frame2

-----  
-----  
-----  
-----  
-----  
-----  
-----  
-----  
-----

-----ESTPPECAVAKTHGAD---D-DMAKQ--LVN-MLHDC-

----EKV-----HDS---IV-D-----N---CSKTLEIS-KCFRTKIH

E---L-----

-----

-----KWA---PSMEEIL

EEVMTEVMIENWLEITRLNDVFLYSRFAN-QMVLGNHNIARGHSRFIVFKIPVLNTKGRR

KQKYNI-----DSLTFGSQLINRYRIILVRLVVTC

-----CKTRKTLTSKALTTKLILYCTLNITLTFNIYV-----SHNNYIEVV

ASYFSLSPKRLCYGLDEMGQLNYDKVTKLNYIFHIMFLTMA SLILLACERFVLLCFYYFF

FYIVGDYREAYLGHVTTSTREEHHSSLLPSVQ-----

-----

-----

-----

-----

>Bany-OBP\_CN32\_GE680582\_35Frame1

-----

-----  
-----  
-----HHRHHHHHHNVP  
TRRHGTFALSRPGPIYLRSGAREREGTMASC-----  
-----WY--IMV--VM-----VM  
SMVSRP-V-----A--GTAE-----VMSH-VTAHFGK  
SLEECREES-----GLSP-E-----IL----E-EF-QHFWSED--F  
--EVV-----HR-ELGCALICMSNK--FSLM-----  
-ED---D--A-R-----MHHVNMHDYIKSFPKG---E-LLSAK--MVE-LIHNC-  
----EQE-----YDD---IK-D-----D---CSRVVKVA-ACFKVSAK  
D---E-----  
-----  
-----GIA----PEVAMIE  
AVLEKYVHKQVGNSIPDLILLFFSCNLGYRPSVFFYSLQVSPLQSHLMDSVITGTCHDEE  
TRFLMSIFPGCMDRGHDGIEVASKTRGCKKK-----  
-----  
-----  
-----  
-----  
-----  
-----  
-----  
-----  
-----  
>Bany-OBP\_CN33\_GS8R7LM03DRG7F\_53Frame1  
-----  
-----FFFFQLNNILVAIIFLKSIRHNDLQL

LFYIAQTVVCIHQTVDNFWASKGGIFSKDSMSTSFKLLYSSLSLFSLFFSKSFSLKGFFF  
FLALLDFGSLPPRAGSGFARLLPSLDVVAVSQAPSPESNPDSPLPVTTMVVAENYHRKVD

KADIKMRRRYQRRVAITAGDCEKARGTMASC-----

-----WY--VMV--VV-----VM

SMVSRP-V-----A--GTAE-----VMSH-VTAHFGK

SLEECREES-----GLSP-E-----IL---E-EF-QHFWSED--F

--EVV-----HR-ELGCALICMSNK--FSLM-----

-RT-----ISRAFPKV-----SCYQQ--RWN YITVSK-

-----SMT-----TSRMTAAA-WRWRRASK

A-----

-----

-----PRTKESL

LKWL-----

-----

-----

-----

-----

-----

---

---

---

>Bany-OBP\_CN3435\_GW3I2KR01CVXZX

-----

-----

-----

-----  
-----TAGGEKARGTMAPC-----  
-----WY--IMV--VV-----VM  
SMVSRP-V-----A--GTAE-----VMSH-VTAHFGK  
SLEECPRE-----E-----IL---E-EF-QHFWSED--F  
--EVV-----HR-ELGCALICMSNK--FSLM-----  
-ED---D--A-R-----MHHVNMHDYIKSFPGK---E-LLSAK--MVE-LIHNC-  
----EQE-----YDD---IKDD-----CSRVVKVA-ACFKVSAK  
D---E-----  
-----  
-----GIA---PEVAMIE  
AVLEKYVHGIKSRTLFIYFSFLSITFRPSVKTVKNCRSVSYITYYLNNNYSYHIFVISKFS  
KIRMHLTNVIQQFSIPLLLFIKTSINRGLNNYCNRFIKIGLPQNNL-----  
-----  
-----  
-----VQFSKHLFSAFKTKESLTITLICTFIVNYGLK-----  
-----  
-----  
-----  
-----  
-----  
>Bany-ABPX\_CN36\_GW3I2KR01AZ1VU1\_53Frame2  
-----  
-----  
-----  
-----XXXYGRGDIIALVNQS

ALPRGITSMAITAGEVTFNWFNFYSNKMASK-----

-----LVL--WMV-----

--LSCLVL-----GAFG-----MDAE-MAELAKM

LRESCVDET-----GVDV-G-----LI---DKVN-AGADL-----

---MQ-----DN-KLKCYIKCVMET--AGMM-----

-SG-----G-D-----VDVEAVIAVLPE-----ELKKH---AN-TMRSC-

----GTQ-----KGT-----DD-----CDTAFKTQ-ECWQKGNK

Q---D-----

-----

-----FFLILSNTYY----

-----

-----

-----

-----

-----

-----

-----

-----

-----

>Bany-OBP\_CN37\_GE680035\_53Frame1

-----

-----

-----

-----

-----GHLRPGEKQRNIDAAMTSA-----

-----ALL--VFL-----F-L  
VSFGHGAK-----EKPE-----LSEE-IKEIIQH  
VHNECVDKT-----GVT--E-----DI---ANCE-NGIF-----  
--KE-----DT-KLKCYMFCLLEE--GSLV-----  
-DD---D--G-N-----VDYDMMISLIPE-----KYTDR--VGK-MINAC-  
----KHL-----DTP---DKDS-----CQRAFDVH-KCSYAADP  
N---F-----

-----YFLFYSTNASLWEK  
SSSNKYVLNIFAWYVKKEK-----KKRK-----

>Bany-OBP\_CN38\_GZKG99Z02C7YYH\_35Frame2

YLRSGGS-----  
-----  
-----  
-----  
-----KLKVIISTSVLLYYSCRSS-----  
-----CLC--CFL-----VSS

FVLGHGAK-----EKPE-----LSEE-IKEIIQH  
VHNECVDKT-----GVTE-E-----DI---ANCE-NGIF-----  
---KE-----DT-KLKCYSMFCLLEE--GSLV-----  
-DD---D--G-N-----VDYDMMISLIPE-----KYTDR--VGK-MINAC-  
----KHL-----DTP---DKDS-----CQRAFDVH-KCSYAADP  
N---F-----

-----YFLFYSTNASLWEK  
SSSNKKVLEIKIITTIGF-----KKEK-----

>Bany-OBP\_CN39\_GZKG99Z02CZ4PM\_53Frame3

-----TAGDCEKARGTMASC-----  
-----WY--IMV--VM-----VM  
SMVSRP-V-----A---GTAE-----VMSH-VTAHFGK



SLEECREES-----GLSP-E-----IL---E-EF-QHFWSED--F

--EVV-----HR-ELGCALICMTIS--RAFP-----

-KV-----SCY-----QQRWNYITVSKSMTTS---RMTAAAW--RWR-RASKAP

RTKESHLK-----WRK---RSWK-----SIKFTSRELNPG-PYFTLVFL

S---I-----

-----

-----TFR---PSVKTVK

NCRSVSYITYYLNNNYLYHFSKNRMKEMHLTNVVQQSFLLLLFIKTSINRGLNNYCNRF

LIGFP-----

-----

-----

-----

-----

-----

-----

-----

>Bany-OBP\_CN40\_GZXD38A01B7FTS1\_53Frame3

-----

-----

-----

-----

-----TAGGEKARGTMASC-----

-----WY--VMV--VV-----VM

SMVSRP-V-----A---GTAE-----VMSH-VTAHFGK

SLEECQEL-----SQRA-V-----IS---KDGR-TNTLARV--R



-----LRISGNLKSVPKSG---E-LLSAK--MVE-LIHNC-

----EQE-----YDD----IKDD-----CSRVVKVA-ACFKVSAK

D--E-----

-----

-----GIA----PEVAMIE

AVLEKYVHGIKSRTLFIYFSFLSITFRPSVLTAQFLYSFHHLSSSLLAEEGLGQSTTLAQ

CGLANTQRIKKNYVIAGFLTIFSF-----

-----

-----

-----

-----

-----

-----

-----

>Bany-OBP\_CN42\_GZXD38A01BULAD\_53Frame2

-----

-----

-----

-----

-----

-----

-----IT-----AGERIGHVHSYS

GRKISVSTY-----TLRR-E-----KI----DPLN-EGVF-----

---IE-----EK-EVMCYIACIMKM--ANAV-----

-KN-----N-K-----LNYEAAMKQADILFPE-----EIKQP--AKD-AITAC-

-----RKV-----ADS---YKDI-----CEASFFVT-KCIYNHNP

A---I-----

-----

-----FYFPLLNLW-----

-----

-----

-----

-----

-----

-----

-----

-----

-----

>Bany-OBP\_CN43\_GZXD38A01B8Y5N\_35Frame1

-----

-----

-----

-----

-----LFTVRGSRRRLPIGRSLF-----

-----GYY--LLVGCIG-----LF

LLVSRP-V-----A---GTAE-----VMSH-VTAHFGK

SLEECREES-----GLSP-E-----IL---E-EF-QHFWSED--F

--EVV-----HR-ELGCALICMSNK--FSLM-----

-ED---D--A-R-----MHHVNMHDYIKSFPKG---E-LLSAK--MVE-LIHNC-

-----EQE-----YDD----IK-D-----D---CSRVVKVA-ACFKVSAK

E---R-----

-----

-----RKSNRSGTRKAMIE

AVLEKLQLSRELNPGPYFTLVF-----

-----

-----

-----

-----

-----

-----

-----

-----

>Bany-OBP\_CN44\_GZKG99Z02C6VHV\_35Frame1

LFTVRGK-----

-----

-----

-----

-----KLKVIISTSVLLYYSCRSS-----

-----ALL--VFL-----F-L

VSFGHGAK-----EKPE-----LSEE-IKEIIQH

VHNECVDKT-----GVTE-E-----DI---ANCE-NGIF-----

---KE-----DT-KLKCYMFCLLEE--GSLV-----

-DD---D--G-N-----VDYDMMISLIPE-----KYTDR--VGK-MINAC-

----KHL-----DTP---DKDS-----CQRAFDVH-KCSYAADP

N---F-----

-----  
-----YFLFYSTNASLWEK  
SSSYKICFRNNNYDVVK-----KEKR-----

-----  
-----  
-----  
-----  
-----  
-----  
-----  
-----  
-----

>Bany-ABPX\_CN45\_GE680205\_53Frame2

-----  
-----  
-----  
-----

-----RPLRPGHVTFNWFNFYSNKMASK-----

-----LVL--WMV-----

--LSCLVL-----GAFG-----MDAE-MAELAKM

LRESCVDET-----GVDV-G-----LI---DKVN-AGADL-----

---MQ-----DD-KLKCYIKCVMET--AGMM-----

-SG-----G-D-----VDVEAVIAVLPE-----ELKKH---AN-TMRSC-

----GTQ-----KGT-----DD-----CDTAFKTQ-ECWQKGNK

Q---D-----

-----

-----FFLILQYILCVCiY

KTLYFKKKK-----

-----

-----

-----

-----

-----

-----

-----

-----

>Bany-OBP\_CN46\_GZKG99Z02D3ZH1\_53Frame1

-----

-----

-----

-----

-----

-----

-----GHYGRGK

QRNIDAAMT-----SAAL-----LV-----

-----FLFLVSFGHGAK--EKPV-----

-DD--D--G-N-----VDYDMMISLIPE-----KYTDR--VGK-MINAC-

----KHL-----DTP---DKDS-----CQRAFDVH-KCSYAADP

N-----

-----

-----FLLFYSTNASLWEE

VVKICFELNIRIGLKEK-----

-----

-----

-----

-----

-----

-----

-----

-----

>Bany-OBP\_CN47\_GZKG99Z02DM7MM\_35Frame2

-----

-----

-----

-----

-----AACV-----

-----SVP-----

RSFGHGAK-----KKTG-----TARK-IKEIIQQ

VHNECVDKT-----GVTE-E-----DI----ANCG-NGIF-----

---KE-----DT-KLKCYMFCLLEE--GSLV-----

-DD---D--G-N-----VDYDMMISLIPE-----KYTDR--VGK-MINAC-

----KHL-----DTP---DKDS-----CQRAFDVH-KCSYAADP

N---F-----

-----

-----YFLFLVLYCLTMGE

VVKICFELNIRIGLKKKKKEKRK-----



-----  
-----  
-----  
-----  
-----  
-----  
-----  
-----

>Ppol-OBP\_Gene0006371\_D2SNQ6\_HELVIOdorantbindingprotein

-----  
-----  
-----  
-----  
-----

-----MS--ILT-----VL  
VKFLVTVT-----I--CEAM-----TMKQ-IKSTGKM  
MRKSCQPKN-----NVED-E-----KI---DPLN-DGVF-----  
--IE-----EK-DM-----  
-KN-----G-K-----LNYEAAIKQADMLLPD-----EIKEP--TKA-AITAC-  
-----RKV-----ADS---YKDV-----CEASFYVT-KCIYKENP  
D--I-----

-----  
-----FFFP-----  
-----  
-----

-----  
-----  
-----  
-----  
-----  
-----  
-----

>Ppol-OBP\_Gene0006368\_C0SQ83\_BOMMOOdorantbindingprotein

-----  
-----  
-----  
-----

-----MYKL-----

-----YLY--VNL-----CLI

ALMPFKSH-----A--MTAE-----QKAA-IHEHFEE

LGTECMKDY-----PITE-E-----DV---NNLR-AKKI-----

---GT-----GE-NVPCFLSCLLKK--VGIM-----

-DD---K--G-M-----LQKETALEYAKKVFND-----AEELKL--IEG-YLHSC-

----SHI-----NGE---TVTD-----GEKGCDRALLSF-QCMLLENAS

Q---F-----

-----

-----GFD---V-----

-----

-----

-----

-----  
-----  
-----  
-----  
-----  
-----

>Ppol-OBP\_Gene0006898\_C0SQ81\_BOMMOOdorantbindingprotein

-----  
-----  
-----  
-----

-----MLYF-----

-----VVV--LSL-----MS

MVALGEGS-----K--PSIQ-----LPAI-VVNVAKE

AASTCLTET-----GASQ-E-----VS---DNFF-KLKF-----

--GT-----DP-DSKSFLYCVARK--TNYA-----

-DE---D--G-----HLNEALLTLFEGS-----EHKDG--VAK-VMETC-

----NKN-----QES-----NK-----IDTMHKTV-ECFYKNTP

V---H-----

-----

-----LAV-----

-----  
-----  
-----  
-----

-----  
-----  
-----  
-----  
-----

>Ppol-OBP\_Gene0010513\_D4AHN1\_9MUSCOdorantbindingprotein1

-----  
-----  
-----  
-----  
-----  
-----

-----MYA-HDKASDV

VADQCLSEM-----YPKG-----KRVE----F-----

-----QESDEACIIYCVLKK--FGIM-----

-NA---N--G-V-----INLEAYRKRVLLAHQL-----DQRKL--MSDSSGSSC-

----AES-----AEG-VQHKQDV-----CKKAKIFN-DCTHLYKI

L---L-----

-----  
-----  
-----  
-----  
-----  
-----  
-----

-----  
-----  
-----  
-----

>Ppol-OBP\_Gene0006369\_C0SQ80\_BOMMOOdorantbindingprotein

-----  
-----  
-----  
-----

-----MSPL-----

-----HSV--FLL--LG-----L

AVSLRHVR-----A---LSQE-----EIAA-IKTGLRP

LIAECGKEF-----GVEE-A-----DI---KKAK-ESGK-----

-----IESLDPCLFACIGKK--MGMI-----

-ND---K--G-E-----FDVEKSSETVKKFVTD----KDEQKK--ILE-IIEKC-

----ASV-----NDE---AVSD-----DKGCDRAILLH-KCMAPYKD

Q---F-----

-----

-----DFS---K-----

-----

-----

-----

-----

-----

-----

-----  
-----  
-----

>Ppol-OBP\_Gene0005282\_OBP2\_BOMMOGeneralodorant-bindingprotein2

-----  
-----  
-----  
-----

-----MGLL-----

-----HWL--SCV--LV-----VL

ALGASP-A-----A---ATAE-----AMSH-VTAHFGQ

MLEDCREES-----GLTV-D-----MM----A-AF-AHYWSDE--F

PTSSV-----QR-EFGCALICMAHK--FSSL-----

-KD---D--V-R-----MHRVNMDDYIRSFPDG---E-LLSDK--MID-MIHEC-

----ERQ-----HDA---ME-D-----D---CDRIMNIS-LCFRRAAL

R---D-----

-----

-----GIA---PSLAMVE

AVLDQYT-----

-----  
-----  
-----  
-----  
-----  
-----

>Ppol-OBP\_Gene0002871\_B8ZWK2\_BOMMOOdorant-bindingprotein2\_Precursor\_

-----MRILRKKSVPSPNRIKMNQNTNF-----

-----VTV--MMF--LTFISVFYLVVTF

KPLTKEEH-----I--EKIN-----KMDS-EVEPFRR

NISECARQV-----KAGK-G-----DV---ENFL-KRIP-----

---QA-----TM-EGKCFVACILKR--NSII-----

-KK-----N-K-----IDHNSLLEANKAVYGE----DREVMTR--LKA-AIVEC-

----NRA-----VEG---IFEI-----CEYASVFN-DCMHIKME

H--I-----

-----LDK---LTMERRM

EALGQMSNSPDEWTDEEDEMLKLVKDEL-----

-----

>Ppol-OBP\_Gene0005278\_OBP1\_BOMMOGeneralodorant-bindingprotein1

-----

-----

-----

-----

-----MRC-----

-----AA--ALA--AL-----AM

LATAPA-G-----L--ATSD-----IMKD-VTLGFGE

ALQHCREES-----QLTE-D-----KM---E-EF-FHFWRED--F

--RFD-----ER-ALGCAIQCMSRH--FDLL-----

-TD---A--H-R-----MHRENTDRFIKSFPNG---E-ALSQQ--MVD-MIHAC-

----EAQ-----HDA---EP-D-----H---CWRILRVA-ECFKASCQ

Q---R-----

-----

-----GIA---PTMEQIM

AELIMEAAD-----

-----

-----

-----

-----

-----

-R-----

-----

-----



>Ppol-OBP\_Gene0010531\_B8ZWK3\_BOMMOOdorant-bindingprotein3\_Precursor\_

-----  
-----  
-----  
-----  
-----  
-----

-----MVA

TAKSCVNHV-----NATQ-E-----DL---E-YL-RNDP-----

---PY-----PE-KSSCIIMCLLEK--VGVV-----

-KN-----N-K-----YSKTGFMMMAVSPLVLA---KKSKLEH--MKT-VSENC-

----DKE-----VNH---HDIV-----P---CQLGNEII-TCVYKYAP

E---L-----

-----

-----HLK---S-----

-----  
-----  
-----  
-----  
-----  
-----  
-----  
-----  
-----  
-----  
-----

>Mcin-OBP\_gene1\_MCINX010046-RA\_ABP5



-----  
-----  
-----MLKF-----  
-----TVY--SCL-----GA  
PKIVSS-----DVAS-QCNSSLP  
EVYSCLGAP-----KIVS-P----DV---ASQC-N-----  
-----SSLPECERMTCIFRK--SGWM-----  
-DG-----E-K-----VDKAKLSAHFDQLAKN---NPEWAAG--VEN-AKITC-  
----LTT-----DLP---AQGI-----H---LNCPAYDSTVCTFASFI  
---K-----  
-----  
-----NTQPS--QWKSNNPK  
CSRARQFAASCPICPNDCFAPLVPGVGSNAACLSLPRSP-----  
-----  
-----  
-----  
-----  
-----  
-----  
-----  
-----  
-----  
-----

>Mcin-OBP\_gene3\_MCINX014308-RA\_OBP

-----  
-----

-----  
-----  
-----MFRL-----  
-----FTS--VTL-----FI  
LCVNGDIL-----AQER-SRGATLK  
PISACCDIP-----ELGEPK-----HL----AECS-NP-----  
-----KLQGPCGDVQCVFEK--SGFL-----  
-ID--K--N-T-----LNKETYKAHLRKWLEG---HKGWEDA--IDK-AIKDC-  
----VDK-----DLR---QYLD-----YPCRAYDVFTCTGIAML  
---K-----  
-----  
-----KCP-----NESWN  
C-----  
-----  
-----  
-----  
-----  
-----  
-----  
-----  
-----  
-----

>Mcin-OBP\_gene4\_MCINX016480-RA\_GOBP2

-----  
-----  
-----

-----  
-----MAVW-----  
-----YL--ILT--AV-----VL  
SAIPKP-V-----K--STAE-----VMSH-VTAHFGK  
SLDECREES-----GLSP-E-----VL---D-QF-QHFWSED--F  
--EVV-----HR-ELGCALICMSNK--FSLM-----  
-QD---D--A-R-----MHHVNMHDYVKSFPQ-----

-----  
-----  
-----  
-----  
-----  
-----  
-----  
-----  
-----  
-----  
-----  
-----  
-----  
-----  
-----  
-----

-----  
>Mcin-OBP\_gene5\_MCINX014306-RA\_OBPLOC100307012precursor

-----  
-----  
-----  
-----

-----

-----

IVIAEPTP-----PQCR-GPPPGMT

HPEKCCNFP-----SLFKDE-----DF----EECG-IERFSDD---

EDHSK-----RGPLDCSQEKCLLNK--YKMM-----

-KD---D--E-E-----IDKDATIEFLDKWAGD---NQDYKDS--VEK-AKEKC-

----LKT-----EIL---DAK-----LPCRPTTLFRCIKYAIF

---V-----

-----

-----ECTQHM-QWEDTDN

CKKLKDLIEECKPYITQP-----

-----

-----

-----

-----

-----

-----

-----

-----

>Mcin-OBP\_gene6\_MCINX017046-RA\_GOBP19a

-----

-----

-----

-----

-----

-----  
-----M-----TRQQ-LKNSGKL  
MKKSCMPKN-----DVTE-E-----QV---GKIE-QGHF-----  
--LE-----ER-NVMCYIACIYTM--TQVV-----  
-KN-----N-K-----LSYEAVIKQVDLMFPP-----DMKDA--VKA-TADKC-  
----KDI-----GKK---YKDI-----CEASYWTA-KCMYEQDP  
K---N-----

-----  
-----FLFP-----  
-----  
-----  
-----  
-----  
-----  
-----  
-----  
-----  
-----  
-----  
-----  
-----

>Mcin-OBP\_gene7\_MCINX015625-RA\_OBP3

-----  
-----  
-----  
-----  
-----  
-----

-----KTLKA  
TARSCMVS-----NATE-A-----DL---E-YL-RDDP-----  
--PF-----PH-KSACVITCLEK--VGIA-----  
-KN-----G-K-----YSKTGFMVTVSPLVLH---NMKKLEH--MKN-VSENC-  
----EKE-----IKP---NEDP-----CQLGNEIT-ICVFKYAP  
E---L-----

-----HFK---S-----

>Mcin-OBP\_gene8\_MCINX017047-RA\_GOBPLush

-----MM-----TRAQ-LKKTMTI



MKNQCMPKH-----GVTN-D-----KV---GKIE-QGVF-----  
---IE-----DH-DVMCYILCVYKT--IQVV-----  
-KN-----N-R-----LDKDLISKQVNALYPP-----EIKEP--VSK-SIEKC-  
----IIV-----QDK---YEDP-----CEGVFYST-KCLYEDNP

A---N-----

-----

-----FIFP-----

-----

-----

-----

-----

-----

-----

-----

-----

-----

-----

>Mcin-OBP\_gene9\_MCINX016478-RA\_GOBP1

-----

-----

-----

-----

-----MAWNSKW---RS-----

-----A--V---FI-----CL

LLHVNW-A-----S---PSQE-----IMKN-LTAGFGK

ALETCKQEL-----NLGD-H-----II---Q-DF-YNYWREE--Y

--DLV-----NA-DTGCAIMCMASK--LDLI-----  
-TD---D--R-K-----LHHGNAHEFAKSHGAD---D-DMAKQ--LVV-MIHEC-  
----EKT-----HAE---VS-D-----D---CARTLEIA-KCFRTKIH  
V---L-----  
-----  
-----KWA---PSMETII  
EELMTE-----  
-----  
-----V-----  
-----  
-----  
-----  
-----  
-----  
-----  
-----  
-----  
-----  
-----  
-----  
-----  
>Mcin-OBP\_gene10\_MCINX002679-RA\_GOBP1  
-----  
-----  
-----  
-----  
-----  
-----M-----  
-----AR--RMV--VL-----ML  
VSKLLV-V-----R--GNVE-----VMKD-VTLGFGE  
ALQHCREES-----QLTE-D-----KM---E-EF-FHFWRDD--F  
--RFE-----DR-ELGCAIKCMSTH--FNLL-----

-TD---S--H-R-----MHHENTDKFIKSF PNG----E-ALSQL--MVE-VIHAC-

----EQQ-----HDA----EA-D-----H---CWRILRVA-ECFKSSCQ

A---R-----

-----

-----GIA----PTMELLM

AEFIMETEA-----

-----

-----

-----

-----

-----

-R-----

-----

-----

>Mcin-OBP\_gene11\_MCINX002972-RA\_GOBP56dlike

-----

-----

-----

-----

-----MSKI-----

-----VVF--WIF-----

-CLSFYLM-----IAGS-----NAGG-ITKSVDY

HLEECIAES-----KADR-D-----SI---KKLR-AGNWR-----

---KS-----DK-ALKKWALCYLSK--HDVM-----

-ST---N--G-V-----LNQDVVLKNIPI-----KDKPH--VEK-IINKC-

----LYK-----QAH-----DP-----IETAWNYL-TCFIKNER

K---Y-----

-----

-----AKL---ANLI---

-----

-----

-----

-----

-----

-----

-----

-----

-----

>Mcin-OBP\_gene12\_MCINX014307-RA\_LOC100307012precursor

-----

-----

-----

-----

-----MLRI-----

-----ASS--CLL--II-----LQ

VVIAELPP-----PQCR-GPPPGVT

HPEKCCNFP-----RMIKDE-----DL---EDCG-IEKYSDD---

EDHSK-----RGPLDCSKQKCLLNK--YNLM-----

-KD---D--E-E-----IDKDAAIEFLDKWAGD---NQDYKDV--AEK-AKEQC-

----LTT-----ELP----GPK-----LPCGPTKILFCVKAVMF

---M-----

-----

-----ECSQRM-QWEDTDN

CKKLKDHIEECKPYFTRT-----

-----

-----

-----

-----

-----

-----

-----

-----

>Mcin-OBP\_gene13\_MCINX008882-RA\_GOBP56a

-----

-----

-----

-----

-----MYPI-----

-----LCL--VLL-----

TTSMVYGK-----T---TYVS-----IPQD-QLPNLLN

SSMACMANS-----GIDS-E-----TM---QRIL-AWKF-----

---DN-----TE-GVRKFIYCFATT--SGYG-----

-DE---N--G-H-----LIKEKMMKLVTNN-----KRKNE--YGN-VIDEC-

----NKT-----KGD-----NK-----YDTMYKTT-TCFYNNSP

I---L-----

-----  
-----LKL-----  
-----  
-----  
-----  
-----  
-----  
-----  
-----  
-----  
-----

>Mcin-OBP\_gene14\_MCINX001051-RA\_GOBP19a

-----  
-----  
-----  
-----  
-----

-----MI--VFI-----AI

VKILVFLN-----F---CDAM-----TMKQ-IKSTGKM

MRKTCQPKN-----NVAD-E-----KI---DPMV-KGEF-----

---IE-----EK-EVMCYVACIMKM--ANAI-----

-KN-----G-K-----LNYEAAMKQADLLLPD-----EIKEP--AKE-ALTAC-

----RKV-----ADS---YKDV-----CESSFFLT-KCIYNHNP

S---V-----

-----

-----FYFP-----

-----

-----

-----

-----

-----

-----

-----

-----

-----

>Mcin-OBP\_gene15\_MCINX002973-RA\_GOBP56like

-----

-----

-----

-----

-----MKTF-----

-----IVL--AVC--LV-----

-----AAQA-----LTDE-QKEKLKK

HRSECLTET-----KADE-Q-----LV---NKLK-TGDFK-----

---TE-----NE-PLKKYALCMLIK--SELM-----

-TK---D--G-K-----FKKDVALAKVPNE-----ADKPA--VEK-LIDTC-

----LAN-----KGN-----TP-----HQTAWNYA-KCYHEKDA

K---H-----

-----

-----SVF---Q-----

-----  
-----  
-----  
-----  
-----  
-----  
-----  
-----  
-----

>Mcin-OBP\_gene16\_MCINX017048-RA\_GOBP19a

-----  
-----  
-----  
-----

-----M-----DRRD-----

-----FSL--LII-----VT

VL---AS-----G---ADSM-----TRQQ-LKNSSKM

LKKNCMGKN-----DVTE-D-----MV---GNIE-KGKF-----

---IE-----DR-KVMCYIACIYQM--SQIV-----

-KN-----N-K-----LNYEASIKQVDMMFPA-----EMKDS--MKA-SIDNC-

----KDI-----SKN---YKDI-----CEASYWTA-KCIYDDNP

K---N-----

-----

-----FIFA-----

-----



-----  
-----  
-----  
-----  
-----  
-----  
-----  
-----

>Mcin-OBP\_gene16b\_MCINX017048-RB\_GOBP19a

-----  
-----  
-----  
-----  
-----  
-----

-----M-----TRQQ-LKNSSKM  
LKKNCMGKN-----DVTE-D-----MV----GNIE-KGKF-----  
--IE-----DR-KVMCYIACIYQM--SQIV-----  
-KN-----N-K-----LNYEASIKQVDMMFPA-----EMKDS--MKA-SIDNC-  
----KDI-----SKN---YKDI-----CEASYWTA-KCIYDDNP  
K--N-----

-----  
-----FIFA-----  
-----  
-----

-----  
-----  
-----  
-----  
-----  
-----  
-----

>Mcin-OBP\_gene17\_MCINX000396-RA\_PutativeOBPA10

-----  
-----  
-----  
-----  
-----  
-----

-----M--QFVT-----IVLS-LLMTLVL

GYDEKYDKI-----DVDK-----IL-----

--GD-----DA-LLTSYLNCFLDK--GPCN-----

-EE--Y--A-S-----EYKEMLPEVISDGCAKC---TKKQKQA--FRK-VLKEL-

----SKN-----KLD---VLLE-----VQKKYDPS-GQYKDNIK

---K-----

-----

-----VME---ED-----

-----  
-----  
-----

-----  
-----  
-----  
-----  
-----  
-----

>Mcin-OBP\_gene18\_MCINX017054-RA\_PutativeOBPA10

-----  
-----  
-----  
-----

-----MKSI-----

-----ILL--FCF-----

-----A-AFVIAEE

TYDTSSDNI-----NLDE-----LL---GNER-----

-----LITSYSKCLINQ--GPCT-----

-PE-----V-K-----KLKDVLPVLETRCAKC---SEKQKQK--GKQ-LISEI-

----KKK-----NPE---IWKQ-----LVSFYDPQ-GKYQEAFQ

D---F-----

-----

-----LKS-----

-----  
-----  
-----  
-----

-----  
-----  
-----  
-----  
-----

>Mcin-OBP\_gene19\_MCINX014913-RA\_PutativeOBPA10

-----  
-----  
-----  
-----

-----MKFF-----

-----IHW--CFQ-----

-----F---TLVI-----CFAY-QYNCENS

TYTTMYDGI-----DLDE-----IL---TNR-----

-----LLAGYVNCLEK--GPCT-----

-PD-----G-K-----ELKNNLPDAIENDCSKC--TERQREG--ADK-VMHYI-

----IDH-----KPE---EWEE-----LEKKYHSD-GSYKLNLYL

L---S-----

-----

-----KQK---LSLDSQE

NKNVSNGDNGDDDDDDNDKDHQGGQQLK-----

-----  
-----  
-----  
-----

-----  
-----  
-----  
-----

>Mcin-OBP\_gene20\_MCINX014305-RA\_noname\_PblastOBP

-----  
-----  
-----  
-----

-----MLTN-----

-----EQF--LFK--KK-----

-----PEKC-YGTDELM

ERKCCIFPP-----FFKR-----DL---ARAC-GAIFALV---

---FT-----DKDSNCDHWKCVLNK--YGIL-----

-DT--D--D-T-----VNNEKYYSHLDKWVNL---NPEFSNV--MTK-AKVYC-

---KEQ-----NRL---AIPL-----NVCEFFDFQSCIRNYVL

---L-----

-----

-----DCP---KIINNQK

CLEWKEFYDECREFFI-----

-----  
-----  
-----  
-----  
-----

-----  
-----  
-----

>Mcin-OBP\_gene21\_MCINX001722-RA\_PBP1-like

-----  
-----  
-----  
-----  
-----  
-----

-----AK-----TDHE-LKEEFTK  
IVMACMKDS-----PVDI-L-----DL---MPLQ-QLIV-----  
---PT-----KK-EVKCLLACAYKK--LGTM-----  
-NS---Q--G-L-----YDIEKAYEYAELVKNGSPTEDEKRLKN--ARK-LVDIC-  
----SKV-----NDE---SVSD-----GQKGCRAALIF-KCGVENAP  
K---L-----

-----  
-----GFK---LQ-----  
-----  
-----  
-----  
-----  
-----  
-----  
-----

-----

-----

>Mcin-OBP\_gene22\_MCINX001052-RA\_PBP2-partial

-----

-----

-----

-----

-----

-----

-----AR-----TDIE-IKKWFIQ

QALDCTKEH-----SATS-E-----EI---QMIK-EHKI-----

---PS-----SN-NAKCLMACMFKK--LNWI-----

-DE---K--G-M-----FSDKNAYKWSENEYPS----DHAKLEN--AKK-LYELC-

----MK-----

-----

-----

-----

-----

-----

-----

-----

-----

-----

-----

-----

-----

>Mcin-OBP\_gene23\_MCINX012604-RA\_noname\_PblastOBP

-----

-----

-----

-----

-----MPFL-----

-----FQI-----

---RADC-----K---NCVV-----LGKA-EKAMFRA

HSEACLAQS-----QVEP-K-----LV---DGLL-RGEL-----

---VE-----DP-RLKRHVYCVLLK--CKMI-----

-SK---D--G-K-----LQKAAVLGKLATR-----GEGKN--VTK-VLENC-

----ANQ-----QGE-----SP-----EDLAWNIF-RCGYDKKA

V---L-----

-----

-----FDYMPAAPSGTEDN

DTK-----

-----

-----

-----

-----

-----

-----

-----

-----



>Mcin-OBP\_gene24\_MCINX006010-RA\_noname\_PblastOBP

-----  
-----  
-----  
-----  
-----MEIL-----  
-----RIL--AVL--SLGISVNTYQHKF  
FSQSLDTE-----PSLS-----IQYA-RDKTSDV  
ITQECLMEM-----YPRN-----LYKY-PLRI-----  
-----DRNDIPCIHCVLKK--FGIM-----  
-SN---D--G-I-----INIRNYYKRVQAIHRY-----DPRIL--ISD-VGDTC-  
----AQN-----ING-MNLDHDV-----CKKAKVFN-DCTQLYVI  
SYRDP-----  
-----  
-----DE-----  
-----  
-----  
-----  
-----  
-----  
-----  
-----  
-----  
-----

>Mcin-OBP\_gene25a\_MCINX005697-RA\_PBP1

-----  
-----  
-----  
-----  
-----MEGY-----  
-----FGL--CVV-----  
--LMSLTV-----RTLA-----LDGE-MAELAKM  
LRDNCVDET-----GVDA-A-----LI---DKVN-AGADL-----  
--MG-----DG-KLKCYIKCMET--AGMM-----  
-SE-----G-A-----VDVEAVIAVLPP-----ELLKH---AD-QLRTC-  
----GTQ-----KGS-----DD-----CDTAFLTQ-SCWQKASK  
S--D-----

-----YILI-----

>Mcin-OBP\_gene25b\_MCINX005697-RB\_PBP1

-----  
-----  
-----  
-----  
-----

-----MAELAKM

LRDNCVDET-----GVDA-A-----LI---DKVN-AGADL-----

---MG-----DG-KLKCYIKCVMET--AGMM-----

-SE-----G-A-----VDVEAVIAVLPP-----ELLKH---AD-QLRTC-

---GTQ-----KGS-----DD-----CDTAFLTQ-SCWQKASK

S---D-----

-----

-----YILI-----

-----

-----

-----

-----

-----

-----

-----

-----

-----

-----

>Mcin-OBP\_gene26\_MCINX011317-RA\_PBP3

-----

-----

-----  
-----  
-----  
-----  
-----E-----LSEE-IKEIIQH  
VHNECVGKT-----GVAE-E-----DI---ANCE-NGIF-----  
---KE-----DV-KLKCYMFCLLEE--GSLV-----  
-DD---D--G-F-----VDYDMMVSLIPE-----QYTDR--VAK-MINAC-  
----KHV-----DTL---DKDK-----CQRAFDHF-KCSYSQDP  
N---F-----  
-----  
-----YFLF-----  
-----  
-----  
-----  
-----  
-----  
-----  
-----  
-----  
-----  
-----  
-----  
-----

>Mcin-OBP\_gene27\_MCINX001721-RA\_PBP5like

-----  
-----  
-----

-----  
-----MLKS-----  
-----SIK--FLF-----  
CFVVLLKF-----C--ALAE-----ISED-LKQTFSE  
MIMQCAKDV-----PLAE-A-----DI---EQLK-NRQM-----  
---PD-----SE-DAKCFLPAPIKQ--QEWM-----  
-DD---E--G-M-----LSVEGVNSIAQKYYAD---DPERLEK--AKM-FTEAC-  
----KEV-----NDV---NVSD-----GNRGCERAALIF-KCSIEKGP  
K---Y-----

-----  
-----DFH---F-----

-----  
>Mcin-OBP\_gene28\_MCINX001718-RA\_PBP5like

-----MKSL-----  
-----CLL--VFV--VA-----L  
AINLDNTR-----A--LSDD-----EKNT-IHSEILP  
FIAECSKEY-----GVTE-E-----QL---KEAK-ESGK-----  
-----VEAINPCLMGCIFKK--INVI-----  
-DD---K--G-L-----FNPDKAEEITKKFLTQ----EEEQKK--ALD-IIKSC-  
---TASV-----NEK---DVSD-----GAEGCERAKLLY-DCFIPFKG  
Q---F-----

-----A-----

-----  
>Mcin-OBP\_gene29\_MCINX001719-RA\_PBP5like

-----MTSL-----

-----SLV--LFV--VG-----L  
AINLRNVQ-----S---LSDE-----DKEN-IHAGIIP  
YVAECSKEF-----GVTE-E-----QI---NEAK-KSGQ-----  
-----VDGIDPCLMGCIFKK--VGII-----  
-DD---K--G-L-----FNPEKSEEITKKFLPN----EDDQKK--ALE-VINSC-  
----KSV-----NDE---DVSD-----GEKGC DRAKLLH-ECFAPIRD  
E---F-----

-----  
-----VKA---G-----  
-----  
-----  
-----  
-----  
-----  
-----  
-----  
-----  
-----  
-----  
-----

>Mcin-OBP\_gene30\_MCINX001720-RA\_PBP2like

-----  
-----  
-----  
-----  
-----MYKT-----  
-----LSL--TCL-----FVM

NFVFFEIA-----A---MTAD-----QKAM-IHQHFEE

LGIECIKVH-----SITE-D-----DI---NNLR-TKKI-----

---PS-----GE-NAPCFLACMFKK--LGLL-----

-DD---G--G-L-----LQKENALELAKKVFND-----DEELKL--IED-YLHSC-

-----SHI-----NSE---SVSD-----GNKGCERSMLAY-KCMIENAS

Q---F-----

-----

-----GFD-----L-----

-----

-----

-----

-----

---

---
