# Supplementary material for: Mosaic Evolution of Molecular Pathways for Sex Pheromone Communication in a Butterfly
Source: MDPI journal article supplement (doi:10.3390/genes13081372), 2022-07-31
Supplement: s1 [file s1]

### Supplementary File S3: Phylogenetic reconstructions for the delta desaturase gene family

Aligned amino acid sequences used for the delta-desaturase phylogenetic reconstruction:

Dpl\_ctg10

-----MEA-----SPAASDV-----EKLSK-----LRE---  
----ANWPPVLFFIYIHILSFFGLWLLFVEA---KLM-  
TILFLVFLVSVGLLGMTTGAHRLWAHRTYEANSALRIALMLFQTLAGIGPIYDWVQYHR  
LHHAYFKTESDPYNPKNGFLHAHFFTRLQKLSPKMTALKDAIDMS--  
DLQNDGIVMFQQRFYWVLYGIIFFLLPLNAPMEYWDESILSTFFIIGILRYAFILHGSWLIE  
SGVCVWGLQEGEKYPPDSNTVFILNRTF---WPEYHYIYPQDYKSGEYG-  
TYGSGCSTAFIRMFVAVMGLAKDLRTLESATLQ-KALAEYARTKQ-----  
-----PLDVCFKNALNNQVLPEEHLKRD-----

Hme\_ctg10\_HMEL002311-PA

-----MAD-----SSS-----MDLSRLSK-----SRE-----  
---ANWPAVLFIYIHVHLLSLYGIWLIFFEA---KLL-  
TILLVVLTLTATLGVTVGSHRLWAHRTYKANLELRIFLMLCQTLAGHGPIYDWVQHHR  
LHHAHFKTDSDLHDSRKGFLYAQFITRFSKLSPYQEELKNSIDMS--  
DLEADSVVMFQRRYYWVLYAVIFLILPLNAPLEYWNDSVLSTVFVMGFVRYALVLHAS  
WLLESGVCLWGLKEGEKYPPDSNSVFILNKTF---WPEYHYIYPQDYKSGEFG-TY-----  
-----  
-----

Ofu\_Z/E14

-----MAD-----IDATNHYDLQDKSEDDKPEDTEGEL---TIVGTDYSY---  
-----THR-----IIWPVIMVYVVMHIGAITGLLLVLGGN----  
VKIASIHWAVFYSLVATEGAHMGAHRCFSHRAFKAKPLLKVILLIMQTISGQHSTYIWC  
DHRQHHRYSDTDGDPHNSKRGMFYCHVGWLMTSRHPLCKKLRKTIDMS--  
DLQQDPLVMFQYRYFRSLFFTFGFLLPVWVPMHFFQESFTNAVVFVCFRLRYVYALHVTY  
FINSLAHKYGTRPYDKTIQPVETWVSVLSLGEGWNYHHAYPWDYKAAEIG--  
MPLNSTASLIRLCASGLAYDLKSVDPETLN-KRIMNKGDGTY-----  
EVKYLQEHVTAIGPLHPLNPSYRGTCPDPEIKLKVRMKP-----

Onu\_Z/E14

-----MAD-----IDATNPYDLQDKSEDDKPEDTEGEL---TIVGTDYSY---  
-----THR-----IIWPVIMVYVVMHIGAITGLLLVLGGN----  
VKIASIHWAVFYSLVATEGAHMGAHRCFSHRAFKAKPLLKVILLIMQTISGQHSTYIWC  
DHRQHHRYSDTDGDPHNSKRGMFYCHVGWLMTSRHPLCKKLRKTIDMS--  
DLQQDPLVMFQYRYFRSLFFTFGFLLPVWVPMHFFQESFTNAVVFVCFRLRYVYALHVTY  
FINSLAHKYGTRPYDKTIQPVETWVSVLSLGEGWNYHHAYPWDYKAAEIG--  
MPLNSTASLIRLCASGLAYDLKSVDPETLN-KRIMNKGDGTY-----  
EVKYLQEHVTAIGPLHPLNPSYRGTCPDPEIKLKVRMKP-----

Bmo\_13\_AGO45858

-----MTA-----EVQNPKSVDENGLNGTTKFDSFLI-STKYIGTDYSY--  
-----KHQ-----IVWKNAIGFLILHLLALWGVVLIVTGN----  
IGLKTFLWTVLFMYAATIGITIGAHRRFFTHKTFKGTPLLKVFLLCQTVAGQNSTFIWARD  
HRLHHRYSDDADPHNSKRGFFFCHIGWLMMKKHPYVIELGRRIDMS--  
DLQADKMIMFQKKYYYYLYFVVAFLIPVVFVPIYFFNEHWLSSFLVCYCARYILQLNGTW  
LVNSAAHLYGTRPYDRKLQPVESWVSCISLGEGWHNYHHAFPWDYKAAEES--  
MHFNSNATIIRFFERIGLAYDLKIASPDMVR-NRIVRSGDGTH-----H-----  
-----  
VLGNDEAKSAVSAIGPLHPLNPTYNSTLKSPDAILKPEGLPLFHEKDVLINDLTRNVAG  
Bmo\_4\_AGO45856

-----MTA-----VSENGNLNNTTKLNSLLINSK-----YIGTDYSY-----  
-----KHE-----IVWKNAIGYLILHLLCLWGVGLIVTEL---EGLK-  
SCLWTLHMYAGSTGVTVGARHLFTHKSFKATPLLKVFLLCQTIAGQNSTFIWVRDHR  
LHHRYSDDADPHNSKRGFFFCHIGWLMMKKHPYVIELGRRIDMS--  
DLQADKMIMFQKKYYYYLYFMVAFLIPVVFVPIYFFNEHWLSSFLVCYCARYILQLNLTW  
LVNSAAHMYGTRPYDRKLQPVESWVSCISLGEGWHNYHHAFPWDYKAAEES--  
MHFNCNATIIRFFERIGLAYDLKTASPD MIR-NRILRSGDGTH-----Y-----  
-----  
VLGNDKAKSAVSAIGPLHPLNPTYNSTLKSPDAILKPEGLPLFHENDVLISDVIRGNIAE  
Bmo\_12\_AGO45857

-----MTAVSENEENLNNTTKLNSLLINSK-----YIGTDYSY-----  
-----KHE-----IVWKNAIGFLILHLLGLWGVGLMVTGN----  
IGLKSCWTLILYMYAGSTGVTVGARHLFTHKSFKATPLLKVFLLCQTIAGQNSTFIWAR  
DHRLHHRYSDDADPHNSKRGFFFCHIGWLMMKKHPYVIELGRTIDMS--  
DLQADKMIMFQKKYYYYLYFVVAFLIPVVFVSIYFFNEHWLSSFLVCYCARYILQLNGTW  
LVNSAAHLYGTRPYDRKLQPVESWVSCISLGEGWHNYHHAFPWDYKAAEES--  
MHFNCNATIIRFFERIGMAYDLKTASPD MIR-NRILRSGDGTH-----H-----  
-----  
VLGNDEAKSAVSAIGPLHPLNPTYNSTLKSPDAILKPEGLPLFHENDVLINDIIRGNIAE  
Dpl\_ctg8

-----MTV-----N---TDILHPNHYNTDVKISKQPNSNFDNDIIKNIGTDYSY-  
-----KHQ-----VWVKNAIGFFILHLLGIWGHLLIVFTGG---IYWQ-  
TFMWTSLLLFTSTEGITIGARHLWSHRTFKATPLLKTILMIFQTLAGQNSIFTWCRDHRLH  
HRYSDTDADPHNAKRGFFFCHIGWLLCKKHPYVKELGKRIDMS--  
DLQNDWMIMAQKKYYYYLYLIFAVIIPVSVPIYFFNEHWLSSFLVCYFARYVFQLNGT  
WLVNSAAHLYGTRPYDKKLQPVESWVSCISLGEGWHNYHHAFPWDYKAAELS--  
MHFNQSAKFIRIFEKLGAYDLKTASPEMVY-NFEMF-----  
-----

Hme\_ctg8  
-----MSP-----NSVIESETQNGSSIIEDKNIITKRIGTDYSY-----  
---RHE-----IVWKNAIGFLILHILAVWGLFILFTGG----  
ISLKTYLWSAFLMVCSEGVGTIGARHLFSHRSFKATPLLKAVLLFFFTMSGQNSAYIWCR

DHRLHHRYSDTDADPHNSKRGFFFSHVGLMCKKHPYVKS LGKRIDMS--  
DLEADWMIMFQKKY YLYVISAIIPVCIPY YFGESFKNSLLFCYFTRYLAQLNGTWL  
VNSAAHLYGTRPYDKKLQPVESW FVSFISLGEGWHNYHHTFPWDYKAAEW--  
NMHFNSSATFIRWFEKLGLAYDLKTASSKMVR-RLI-----  
-----

Dpl\_ctg5

-----MRQ-----KTKHSIADQLNEDIIDNKSDSDFDL---MKYEALEF-----  
-----KPR-----IKWPDLLVQLCLHSTTVYGFYLILVNR----  
VKLYTILFVFFTIYTSFGGITAGVHRLWSHRAYKANLPLRILLALLFTVTGQORDIYTWALD  
HRVHHKYTETVADPHDVRRGFWFAHVGWLVLT PHPAVEDRRISLRKTSLLADPVVR  
WQKIFFIPLFVLLNVFLPIAIPVYFWHESYINSFVLSFVTRFTITLNIAYSVNSFAHMGWGNK  
PYDRFIKSVENRIVSLAALGEGWHNYHHVFPWDYRTSELG---  
MINISTTFIDAFKIGWAYDLKVATNEMIR-NRARRNGDRSL-----R-----  
-----HLEEDPSVSSE-----

Bmo\_6\_AGO45854

MAPAQQNIEVCTEVMEPALELRITSDGCKDEN-----  
NVEHSKNNNTVKQNNILNEKTNNETDFDI---SKYEAMEF-----TPR-----  
IRWPDLVVQVSLHLVSIYGIFLIVTNE----  
VKLLTTLFALATIYTSFGGITAGVHRLWSHRAYKARTPLRILLAFLLFTITGQORDIYTWALD  
HRVHHKYSETVADPHDVRRGFWFAHVGWLVLT PHPAVEDRRVALRKCSLDLIEDPVVR  
IQKIFIPFLFLLNILIPIWIPWYFWNESLVT SFVISFVLRFTTTLNIAFSVNSFAHLWGNKPY  
DRFIKPAENSVVSLAALGEGWHNYHHVFPWDYRTSELG---  
RINVSTNFIDFFAKIGWAYDLKAATSSMIE--IELRGAVMA-----  
--L-----

Hme\_ctg5

-----MHLIN-----KLEHIENNNTVLAQEYSDKI--NDTDFNI---SNYEAVEF--  
-----RPQ-----IKWPD LIVQV MLHLVSIYGCFLVITSE----  
VRFLTTLFAFATIYTSFGGITAGVHRLWSHRAYRARLPLRILLALLFTITGQKDIYTWALD  
HRVHHKYSETVADPHDVRRGFWFAHVGWLVLT PHPAVENRRKALKKTSIDLINDPVVR  
LQRRFFIPLFIILNVLPVGVVPVYFWEEALLYSFVVSFVTRFTITLNI AFCVNSFAHMGWGN  
KPYDRFIKPVENSVVSLAALGEGWHNYHHVFPWDYRTSELG---  
RLNLSTKFIDTFARIGWAYDCEFVV-----FLSF---  
-----

Ape\_E6

-----MK-----IIFDEILR-----RFERVFAF-----DND--  
-----IKWGSV FVIFGYHALAVYWCYNYS LPV---KWQ-  
TVIFAYCTYVLSGMGITLG VHYRWSHRCFKATKPLQIILFLMFALTGQTSIRIWVRNHRL  
HHKASDTPGDPHNATRGLFYSHIGWLM MKKTDQLIEQGKKIDMR--  
DIDSDPLL RWYDRNVFMVNLMAAFVLPTMVNIWCLGESWRC A VAWQCFVRYLGV LH  
AQMTINSLAHKFGNRPFNSRIKPAENMFVSYITFGE GFHNYHHVFPYDYRTT--  
GDYFILDY GKILLKFFEKIGWAYNL RKASPETIA-SAVGR-----  
-----LNCAESDDLK S-----

Bmo\_15\_XP\_004933819

-----  
-----  
MIIVSGAGITCGVHRLWTHRSYKAKAPMKLLLMACFCSSGQNSIYNWVRDHRLHHKFA  
DTDADPHNVKRGFFFSHIGWLMVKKNESVLTKGKLIDMS--  
DIESDSHLMFEHKYHNQLTILFCFLIPTLMNIFLIGEDWKCAVAWQCFIRYLYVLHCELT  
NSLAHMYGYKPYNVNIEASENILVSVLTYGEGYHNFHHVFPDFRAAET--  
MDFFSLSTKIISTFEKIGWTYDLKQASPEMIEAARDKLGGDGSK-----  
-----AHN-----

Bmo\_14\_AGO45859

-----MERDKKVMKKITPER--SLSEIFR---TFEKS LGF-----  
---QND-----IKWPSFIITLYHVIGAYWCYNFAFPV---KWQ-  
TVVFAAIMYVATGFGITGGAHRLWTHKSYKAKLPLKLFLLLCFSAAGQNSLYQWVRDH  
RIHHKFSDTDADPHNANRGLFFSHIGWLMMKKNNEVILRGKQIDMS--  
DIENDPFLRFYDKNFNSLKLVCYIPPTMLGILLWNEEWKCAVAWQCFIRFLGMFHSELT  
VNSLAHTFGYKPYNKNIVPAENRFVSICITLGEGWHNYHHAFFPDYKAAEH--  
FDFNFNGTKFIKLFEEKIGWAYDLKEATPEMIN-AIAKKLGDGTP-----V-----  
-----HFPILVTKTN-----

Dpl\_ctg6

-----MEN-----INLKHLPPISETF-----AFEKS LGF-----  
KND-----IKWTSAILLTLYHIAAVYWCYHYALPV---KMQ-  
TVIFAAIMYVATGFGITGGAHRLWTHKSYKATLPLKLFLLMCFASAGQNSLEQWVRDH  
RLHHKHSDTNADPHNANRGLFFSHIGWLMMKKNKEVIIRGKQMDMT--  
DIHEDPILIFYNKHFAFYRLLFCFVLPFMINVYILKESWQCTIAWQWFIRFLSMFHSELT  
SLAHAYGYRPYNKNIVPRENRFVATCTLGEGWHNYHHAFFPDYKAAEH--  
FDLFNWGTLFIQAFEKLGLAYGLRMATPEMIS-NLSKRLGENAQ-----  
-----

Hme\_ctg6

-----MEK-----INKRSTLSLSEIFR-----SFEKN LGF-----  
KND-----IKWTTAILIVLYHVAAVYWCSLYTFPV---KWQ-  
TVVLAAIFYVITGFGITGGAHRLWTHKSYKATLPLKLFLLMCFSCAGQNSLEQWVRDHR  
VHHKFSDTDADPHNSNRGLFFSHIGWLMMKKNAQVRNSGKLIDMT--  
DITNDPLLKFYNKYFSYFKLFFCYVLPVSINVYLFGESWQCAVAWQWFIRFLSMFHSELT  
VNSLAHAYGYKPYNKNLIPTENRFVATCTLGEGWHNYHHAFFPDYKAAEH--  
FDMFNWCTRFIQGFEEKLGLWAYDLREATPEMIN-SIAQRLGDGTP-----V-----  
-----HFPLKSQNEL-----

Hme\_ctg7

-----MGF-----LTP-----  
IRWTMVITITLFIITLVGFFNSVFTEGRLPMWK-  
TIYFATFVGVFGGFGVTGGVHRYWTHRSYKAKLPLQIILMSGFAISGQNNIFNWVRDHR  
VHHKLSETSADPHNAHRGFFFSHVGVWLMMKKHPHWISEGNKIDMT--

DILNDTVVQFHTRYFVWIKLLLCFLLPTAIIYFWGESVVASLIT-  
TAVRYMLGLHMTWAVNSFAHIWGNKPYDTNITPVENWKVSFVAMGEGWHNYHHTFP  
WDYKAAELA--YFINITLIDLFATIGWAYDLKKAAPSLIK-AVVKSRRGRQTK-----  
-----KMS-----

Bmo\_7

-----MAP-----  
LNIVDTPYSDLTKLEDSIENKPNNQANKPNNFEKTNTVDPYDEVKLNEPIFLAPIRKWEK  
RMGFVTPIRWTNAILITTFHVTVVWGFYTLFYEKQKPMWQ-  
SVIFGIFMGQLAGFGVTAGAHRYWCHRSYKAKLPLQLILALCYSAAGQNTIYEWVRDHR  
VHHKFSETSADPHDANRGFFFSHIGWLMMKKHPDVVKQGSKIDMS--  
DIIHDPVVFCTKYFILFKITFCWIIPSALPVYAWGELWNIAILSQAFWRYMLSLHFTWSVN  
SFAHLWGNKPYDRYIMPCENKGVSIAMGEGWHNYHHTFPWDYKAAELG--  
VPNNTTFLDLFARIGWAYDLKQASPALVR-AVAKQRGECKE-----  
-----

Dpl\_ctg7

-----MGF-----ITP-----  
IRWTNAILISSFHIMAVITFLYTFSSG-MVPTLE-  
TVFFGFLCGWIGGFVGTAGAHRYWTHRAYKAKIPLQIILIIAYSVAGQNSIPNWVRDHRV  
HHKMSETSADPHDANRGFFFSHVGWLMMKKHPDVVKEGKKIDMS--  
DILEDPLVRFHNTKYFNTEFKILFCFVIPILPTYMWKETLFI SVTA-  
SLVRYMSNLNCTWAVNSVAHIWGQKPYDINITPVENWKVSIVAMGEGWHNYHHTFPW  
DYKASELA--YFINVTFLIDIFGKIGWAYDFKVASPALVK-AVIRKRGPRF-----  
-----

Bmo\_3\_AGO45851

-----MPP-----QV--DPIPSGVVFESDTQTD--DLGLDKD--VSVLKKATPK--  
-----KHE-----LVWFNIIWFLFLHISSLYGLYL VFTSA---KWQ-  
TNVFAFGVHLMCAIGIGAGSHRLWTHRSFKARTPLRIVLMIWQTMGFQDCIFEWARDHR  
THHKYADTDADPHNAERGLFFSHMGWLCKKSPEVIEGGRRIDLS--  
DLYADPVVMFQKKHYMKMMPILCFVLPTVIPVYFWDETWLNAFFIPTILRYTCGINVVW  
SVNSFAHTFGYRPYDKSLNPRENIGVWMICV-  
EGFHNYHHTFPWDYRATEHPLYNMLTPTIVFIDAMAMIGQAYDLKTVPHDIK-  
QRTHRTGDGTH-----Q-----  
LWGWDDPEFNEKLKEKYSRVSYAERKCG-----

Dpl\_ctg4

-----MPP-----QA--DPTPSGVLFETDTQTP--DLGLDKD--VSILKKARPR---  
-----KYE-----YVWFNIMWFLFLHVASAYGIYL VFTSA---KWQ-  
TNVFAFLVHLCCAIGIGAGSHRLWTHRSFAKTPLRILLMIWQTMGFQDCIFEWARDHR  
THHKYADTDADPHNAERGLFYSHMGWLCVKKKSPEVLEGGRRIELK--  
DLYDDPVVMFQKRHYLKMMPILCFVFPTIIPVYFWNETWLNAFLIPTILRYTCGINIVWS  
VNSFAHVFGYRPYDKSLNPRENIAVWMFCV-  
EGFHNYHHTFPWDYRATEHPILNMLTPTIMFIDLMAKLGQAYDLKTVTPDIK-

QRAQRTGDGTH-----H-----  
LWGWDDPEFTEKMKLRYGITNSERKTA-----

Hme\_ctg4

-----MPP----LV--DPTPSGVLFESDTQTA--DLGLDKD--VTGLKKAAPR--  
-----KYE-----YVWFNIFWFLFLHASSAYGIYLGLTSA---KWQ-  
TNVFAFAVHLMCAIGIGAGSHRLWTHRSYKARTPLRTLLMIWQTMGFQDCIFEWARDH  
RTHHKYADTDADPHNAERGLFYSHMGWLCCKKSPEVIEGGRRIDVS--  
DLYDDPVVMFQKRHYMKMMPVLCFVLPITIPVYFWGETWLNAFFIPTILRYTIGINVVW  
SVNSFAHKYGYRPHYDKSLNPRENIAVWMVCV-  
EGFHNYHHTFPWDYRATEHPILNMLTPTIMFIEGMAKIGQAYDLKAVSPDIK-  
QRSQRTGDGTH-----H-----  
LWGWDDPEFTEKLKSRYGVVNKPERKCA-----

Dpl\_ctg9

-----MTA-----SAFLHDPMHQKN-----IGELSQLDPPRQRRDY-----  
-----EWQ-----IVWRNVLA FVYLH MATLYGIYLILIGK----  
TKILTLIFAVTISAMSAMGVTAGAHRLWAHRA YKARWPLRIFLAVMQTMAFQNHIEW  
VRDHRVHHKFTETDADPHNAKR GFFFSHMGWLMVRKHKA VFEKGASVDMS--  
DLEKDPIVMFQKKTYLVLMPLL CFVVP AWLPVVLWNENPWVSWYVASMLRYTISLHFT  
WLVNSAAHIWGNRPYDQYIGATDNKA VAICAFGEGWHNYHHVFPWDYKAAELG-  
NYSTNLSTALIDFAAKYGLAYDLKTVSIEMIR-KRVSRTGDGSH-----  
PLSSKKESLNQH----DHHHPENPVWGWGDEDMTEEEKKLAEIAHKLN-----  
-----

Hme\_ctg9\_HMEL015726-PA

-----MTA-----ST--FLRANGSYAKADCNTP-----SLI----TQGKRRDY-----  
-----EWQ-----IVWRNVLA FVYLHVAAA YAFYLIFSGR----  
IWTSTVVFALLFAAMSALGITAGAHRLWAHRA YKARWPLRVFLALMQTMAFQNHIE  
WVRDHRVHHKYTETDADPHNARR GFFFSHMGWLMVRKHKEVFEKGGSVDMS--  
DLEKDPIVMFQKRTYLFVMPLLCFILPTWIPVALWNESPWNSWYVAAIMRYTVSLHFTW  
LVNSAAHIWGNRPYDKYIGATDNKTVAICAFGEGWHNYHHVFPWDYKAAELG-  
NYSTNFS TALIDVA AKYGLAYDLKTVSAEMIR-KRVARTGDGSH-----PL--  
DKKSKQDD----GHHHPENPIWGWDDKDMTEDEKQLAEIAHKLS-----  
-----

Has

-----MAA-----MSSTSLLLANTMLSSK--  
LQDHDDLRYAEPRKPNRDY-----EWQ-----  
VVWRNVLA FVYLHVSAVYGLYMLTGK----  
VKSYTILFGALFAIMSGMGVTAGARRLWAHRSYKARWPLRVFLALMQTMAFQNHIE  
WVRDHRVHHKFTETDADPHNAKR GFFFSHIGWLMVRKHKDVFEKGATVDMS--  
DLEQDPIVMFQKKTYLVVMPILCFVIPAWIPVHFWDENPWTSWYTAATRYTIALHFTW  
LVNSAAHIWGNRPYDKNIGATDNKMVAICAFGEGWHNYHHVFPWDYKAAELG-  
DYSTNLSTALIDFAAKHGYAYDLKTVSADMIR-KRVNRTGDGSH-----P-----

WTK--GKVEGDHYHPENPVWGWEDTDMTEEEKQFAEIVHRKTE-----  
----

Dpu

-----MEF-----IMAGSKIIAKNVDHDE--DPRIVSA----PQMKNRDY-----  
-----EWH-----IVWRNVLAFIYLVHAAAAYGLYLMFTGK----  
VNAFTILFAFSFAAMSAMGVTAGAHRLWAHRA YKARWPLRLYLALMQTMAFQNHIE  
WVRDHRVHHKFTETDADPHNARRGFFFSHMGWLMVRKHKDVFEKGATVDMS--  
DLEKDPIVMFQKKTYLVVMPLLCFLIPSYIPVWLWNEDPWSSWYVASITRYTLTLHFTW  
LVNSAAHIWGTRPYDKNIGATDNVAVAIGAFGEGWHNYHHVFPWDYKAAELG-  
NYRTNLSTALIDIAAKYGLAYDLKTVSKEMIE-QRVSRTGDGSH-----P-----  
WAQQTEDCSDEHHHPENPVWGWDDTDMPEEDKQLAKIVHRKTE-----  
-----

Lca\_NF

-----MAPNILGSSLFLADTTLGKNVDDDHSSN---FSASDN----  
YSGKR RDY-----EWQ-----IVWRNVFGFIYLHTGMLYGFYLIFTGQ----  
VKFFT VLFVLFVLAFAILSAMGVTAGAHRLWAHRA YKARWPLRLILAFQTMAFQNHLYEW  
VRDHRVHHKFTETDADPHNAKR GFFFSHIGWLMIRKHKDVFEKGASIDMS--  
DLEADPIVMFQKKTYLVVMPILCFVLPAYIPIVWWGEVPWTSWYVATILRFTVSLNFTW  
LVNSAAHIWGNRPYDENIGATDNKTVAIFGEGWHNYHHVFPWDYKAAELG-  
NYSTNMSTAIIDYAAKHGWAYDLKTVSVD MIR-KRVARTGDGTH-----  
PSNDDTKKKLEE----DHHHPDNPVWGWDDTDLKDEDRKFAEIAHPKEQ-----  
-----

Cpa\_Z9

-----MTT-----GT--SLALAGTYFAAKNKKVDDDDITTPLT---RISGKR RDY-  
-----EWQ-----IVWRNVLA FVYLHVGLLYGFYLILTGR--VKLW--  
TPVFAVTFTVLSALGVTAGAHRLWAHRA YKARWPLRLILALLQTMAFQNHIEWVRDH  
RVHHKFTETDADPHNAKR GFFFSHIGWLMVRKHKKEVFEKGASIDMS--  
DLEKDPIV MLQKKTYLVVMPILCFLLPSWIPVYFWGEDPWTSWYVASIWRYTMSLNFT  
WLVNSAAHIWGNKPFDKNIGATDNLTVAICAIGEGWHNYHHVFPWDYKAAELG-  
NYRTNISTAIIDLAAKYGWAYDLKTVSTQMIL-NRVTRTGDGSH-----  
PSVSGDSKQLEETEHDHHPENPVFGWTDADISEEDRMLVEITHKIDENDD-----  
-----

Obr\_tdes

-----MAP-----N---TLKEDVMIVNEE-----TSEKL----VV-GAAPR-----  
----KYK-----VVWFIVAYATYVHIAAVYGLYLAVTSA----MWP-  
TIALTFINNILSILGLTAGVHRLWTHKSYKAKLPLQIFLMLCHTASNTFTSISWIRDHILHH  
KYTDTDADPHNSTRGFFFSHIGWAMVKKQPEARAKGKSIDLS--  
ELYANPVLR FQQKNVWLTLVAYIIPSLVPL-IWNETFTVAYHM-  
NLLRVTVVFNTFLLINSVAHMGWTRPYDETILPAQNKTVSFFTLGEGFHNYHHVFP HDY  
RTAELG-DNFLNLTTKFIDFCAWMGQAYDRRYVPDDVIA-ARMKRTGETNE-----  
-----KNT-----

Bmo\_11\_ABD36148

-----MAQ-----NQTYNGLIVTEIEDSS---LEHDSV----KPSVVGPR-----  
-----EYE-----IVYKNIFIHIYLHVTFYGLYLCCTTA---KWP-  
SVGFAYLCYVAATIGVTAGAHLWSHKSYKARLPLQILLMVFLSLANQRAT-  
HWVRDHRVHHKYSDDADPHNASRGFFYSHIGWLFVRKHPEVKKKGKLDLS--  
DLFDNPALMFQHRYSKTFIPIVCFGLPTILPVILWDELLVVAWNL-  
TIMRYVINFHVFFLVNSVAHIWGNKPYDKTIKSAENNLVAFATLGEGYHNYHHVFPWD  
YRCTELG-RTWLNYSKLFIDLCAKVGLAYDLKVVSDDVIL-RRVKRTGDRSH-----  
-----FIEN-----

Bmo\_8\_AGO45853

-----MSRFQAP-----S---NEDRDDVFSEEE-----TRLEKL----IAPQAEPR-----  
-----EFK-----VVYRNIIVLLYYHMAGIYGLYLGLIAA---KWA-  
TVISAFITYCISVIGVTAGSHRLWSHKSYKATKPLQLFLMLCQSVSNQHSVAYWVMVHR  
LHHKYSDDADPHNATRGIFYSHMGWLMVRKHPEIEKRGKLLDLS--  
DIYGNPYLKFQDTHYYWFLPLMSFLLPTIIPMYFWGETCSVAWNV-  
NMCRYVMNLNAIFLVNSVAHMGWGYKPYDKNIAPSQNLSVSVLSLGEGFHNYHHVFPW  
DYKCELS-SFRNPTTVFIELCAKLGLAYDLRSASDDLIE-GRAKRTGDGSY-----  
-----LTLKKS-----

Dpu\_Z/E11\_1

-----MAP-----N---ITNEEIIVSETDHDQS-----KRPQAEPR-----  
-QYH-----IVYRNIAVFLYYHAGIYGLYLCFGNA---MWT-  
TIFWNVFTFIIAGLGVTAGAHLWSHKAYKATRPLQIFLVLAQSVANQHSVAHWARDHR  
LHHKYSETDADPHNSTRGFFYSHVGVLMVRKHPEVTRRGKTVDMS--  
DIYNNPYLKLQDKHSYWFIPLLSFFIPTYIPT-LWGESLTNAWHI-  
NMFYILNLNATFCVNSVAHLWGQKPYDKHIAPSQSPKVNVTTLGEGFHNYHHCFPWD  
YRSDELG--LTFNFTTGFDICEKLGLAYDLRSASEEVIA-ARAERTGDGSR-----  
-----IKSL-----

Pex\_tdes

-----MVP-----D---VLREAERLQDDA-----KL---VAPQAEPW-----  
---KFQ-----LSYTNVVIFGYLHISGIYGLLFCVSKA---HWA-  
TIFFSFILLVASVIGVTAGAHLWSHRSYKANLPLQIILMLFHSLSGQYTAFNWARDHRLH  
HKYSDDADPHNATRGFFYSHIGWLLVVKHPEVRKRGEAIDLS--  
DLLRNPVLTQQRKNVVLILALLCYIMPTAVPMYFWGETFHNAWHI-  
MALRFVLCLNFISLINSAAHTFGNKPYDKSIMPTQNMSVTLATLGEGFHNYHHVFPFDYR  
AAELG-NNTFNLTTKFIDFFAMIGWATALKTVGHESIA-RAAQRRTGDGSL-----  
-----TWKSDCEVVPGLKSG-----

Lca\_Z9

-----MPP-----N---VTEANGVLFENDVQTP--DMGLEVA---PVQKADER---  
-----KIQ-----LVWRNIIAFAYLHLAAVYGAYLFF TSA---KWQ-  
TDIFAYILYVMSGLGITAGAHLWAHKSYSKAKWPLRLILVAFNTLAFQDSAIWARDHR  
MHHKYSETDADPHNATRGFFFSHIGWLLCRKHPELKRKGQGLDLS--



DLYADPILRFQKKYYLLLMPLACFVLPTIIPVYLWGESWKNALFVAAMFRYTFILNVTW  
LVNSAAHKWGGKPYDKNIQPAQNISVAIFALGEGFHNYHHTFPWDYKTAELG-  
NNRLNFTTSFINFFASFGWAYDLKTVSDEIIQ-QRVKRTGDGSH-----H-----  
-----LWGWGDQDIPAEAAQAALRINRKDD-----

Has\_Z9

-----MAP-----NI--SEDVNGVLFESDAATP--DLALSTP---PVQKADNR---  
-----PKQ-----LVWRNILLFAYLHLAAQYGGYLFLFSA---KWQ-  
TDIFAYILYVISGLGITAGAHRLWAHKSYSKAKWPLRVILVIFNTVAFQDAAMDWARDHR  
MHHKYSETDADPHNATRGGFFFSHIGWLLVRKHDPDLKEKGKGLDMS--  
DLLADPILRFQKKYYLILMPLACFVMPTVIPVYFWGETWTNAFFVAAMFRYAFILNVTW  
LVNSAAHKWGDKPYDKSIKPSENLSVAMFALGEGFHNYHHTFPWDYKTAELG-  
NNKLNFTTTFINFFAKIGWAYDLKTVSDDIVK-NRVKRTGDGSH-----H-----  
-----LWGWGDENQSKKEIDAAIRINPKDD-----

Sli\_Z9

-----MAP-----NI--SEDVNGVLFESDAATP--DLALARP---PVQKADNK---  
-----PKQ-----LVWRNIILFAYLHLAALYGGYLFLFSA---KWQ-  
TDIFAYILYVISGLGITAGAHRLWAHKSYSKAKWPLKVILIFNTVAFQDAAMDWARDHR  
MHHKYSETDADPHNATRGGFFFSHIGWLLVRKHDPDLKEKGKGLDMS--  
DLLADPVLRQKKYYLLLMPLACFVMPTMIPVYLWGETWTNAFFVAAMFRYAFNLNV  
TWLVNSAAHKWGDKPYDKSIKPSENMSVAMFALGEGFHNYHHTFPWDYKTAELG-  
NNKLNFTTAFINFFAKIGWAYDMKTVSEDIVK-NRVKRTGDGSH-----H-----  
-----LWGWGDENQPKKEIEAATRINPKDD-----

Poc\_Z9

-----MAP-----N---VTEENGVLFESEDAVTP--DLAMARA---PVQQADST---  
-----PRV-----YVWRNIIFAYLHLAAVYGFYLLLVSA---KWQ-  
TDIFAYILLYVASGLGITAGAHRLWAHKSYSKAKWPLRVILTLFNTIAFQDSAIDWARDHR  
MHHKYSETDADPHNATRGGFFFSHIGWLLVRKHPELKRKGKGLDLS--  
DLYADPILRFQKKYYLLLMPLACFVLPTVIPVYLWSETWTNAFFVAALFRYTFILNVTWL  
VNSAAHKWGDKPYDKDIKPSENMSVSLFAFGEGFHNYHHTFPWDYKTAELG-  
NHRLNFTTKFINFFAKLGWAYDMKTVPDTIVQ-QRVKRTGDGSH-----H-----  
-----LWGWGDKDHAQEEINAAIRINPKDD-----

Epo\_Z9

-----MAP-----N---VTEENGVLFESEDAATP--DLALARE---PVQQADSS---  
-----PRV-----YVWRNIILFAYLHIAAVYGGYLFLFSA---KWQ-  
TDIFAYILLYVASGLGITAGAHRLWAHKSYSKAKWPLRLILTIFNTTAFQDSAIDWARDHR  
MHHKYSETDADPHNATRGGFFFSHIGWLLVRKHPELKRKGKGLDLS--  
DLYADPILRFQKKYYLILMPLACFILPTVIPVYLWNETWSNAFFVAALFRYTFILNVTWL  
VNSAAHKWGDKPYDKSIKPSENLSVSLFAFGEGFHNYHHTFPWDYKTAELG-  
NHRLNFTTKFINFFAKIGWAYDMKTVSHEIVQ-QRVKRTGDGSH-----H-----  
-----LWGWGDKDHAQEEIDAAIRINPKDD-----

Ave\_Z9

-----MAP-----NVTENGVL FESDAATP--DLALGTA----PVEQADDS-----  
-----PRV-----YVWRNIILFAYLHLAAIYGGYLFLFSA----KWQ-  
TDIFAYFLYVASGLGITAGAHRLWAHKSYSKAKWPLRVILTTFNTIAFQDSAIDWARDHR  
MHHKYSETDADPHNATRGGFFFSHIGWLLVRKHPELKRKGKGLDLS--  
DLYADPILRFQKKYYLLLMPLACFILPTVIPVYLWNETWTNAFFVAALFRYTFILNVTWL  
VNSAAHKWGDKPYDKSIKPSENMSVSLFAFGEGFHNYHHTFPWDYKTAELG-  
NHRLNFTTKFINFFAKIGWAYDMKTVSNEIVQ-QRVKRTGDGSH-----H-----  
-----LWGWGDKDHAQEEINAAIRIHPKDD-----

Cro\_Z9

-----MAP-----N---VTEENGVL FESDAATP--DLALART----PVEQADDS-----  
-----PRI-----YVWRNIILFAYLHLAAIYGGYLFLFSA----KWQ-  
TDIFAYFLYVASGLGITAGAHRLWAHKSYSKAKWPLRLILTIFNTIAFQDSAIDWARDHRM  
HHKYSETDADPHNATRGGFFFSHIGWLLVRKHPELKRKGKGLDLS--  
DLYSDPILRFQKKYYMILMPLACFILPTVIPVYMWNETWSNAFFVAALFRYTFILNVTWL  
VNSAAHKWGDKPYDKSIKPSENMSVSLFAFGEGFHNYHHTFPWDYKTAELG-  
NHRLNFTTKFINFFAKIGWAYDMKTVSQEIVQ-QRVKRTGDGSH-----H-----  
-----LWGWGDKDHAQEEINAAIRINPKDD-----

Dpl\_ctg3

-----MAP-----N---SSDANGVL FESDAATP--DLALPNT----PIQQADSY-----  
-----PRK-----YVWRNIIAFAYLHIAALYGGYLFLFSA----KWQ-  
TNIFAYILYVMSGLGITAGAHRLWAHKSYSKAKWPLRVILVIFNTLAFQDSAIDWARDHR  
MHHKYSETDADPHNATRGGFFFSHIGWLLVRKHPELKRKGKGLDLS--  
DLYADPILRFQKKYYLLMPISCFILPTIIPVYLWGETWTNGYFVAAMFRYAFILNVTWL  
VNSAAHKWGDKPYDKNIQPSENMSVSLFALGEGFHNYHHTFPWDYKTAELG-  
NNRLNFTTTFINFFAKIGWAYDLKTVSDEIVK-QRVNRTGDGSH-----H-----  
-----LWGWGDKDHSKEEIRAAIRINPTDDKEE-----

Hme\_ctg3

-----MAP-----N---SGDANGVL FESDAATP--DMALPIT----PIQQADQY-----  
-----PRK-----LVWRNIIAFAYLHLAALYGGYLFLFSA----KWQ-  
TDIFAYILYVMSGLGITAGAHRLWAHKSYSKAKWPLRVILIIFNTLAFQDSAIDWARDHR  
MHHKYSETDADPHNATRGGFFFSHIGWLLVRKHPELKKKGKGLDLS--  
DLYADPILRFQKKYYLILMPIACFILPTLIPVYLWGESYINAYFVAAMFRYAFILNVTWL  
NSAAHKWGDKPYDKNIQPSENISVSFALGEGFHNYHHTFPWDYKTAELG-  
NNRLNFTTNFINFFAKIGWAYDLKTVSDEIVQ-KRVKRTGDGTH-----H-----  
-----LWGWGDKDHAADKNAAIRINPKEDKDD-----

Bmo\_1\_AFK13829

-----MAP-----N---VKDANGVL FENDADTP--DLGLSST----PVQQADNY---  
-----PKK-----LVWRNIILFTYLHIAALYGGYLFLFHA----KWQ-  
TDLFAYILYVMSGLGITAGAHRLWAHKSYSKAKWPLRVILIIFNSLAFQDSALDWARDHR  
MHHKYSETDADPHNATRGGFFFSHIGWLLVRKHPELKRKGKGLDLS--  
DLYADPILRFQKKYYLILMPIACFILPTVIPVYFWNESWINAFFVATLFRYTFILNVTWL  
NSAAHKWGGKPYDKNIKPSENISVSFALGEGFHNYHHTFPWDYKTAELG-

NNRLNFTTNFINFFAKIGWAYDLKTVSDEIHK-NRVNRTGDGSH-----Y-----  
-----LWGWGDKDLDKEEIKQAIRINPKDN-----

Mse\_Z9

-----MPP-----Y---TSDANGVLFESDAATP--DLALSST---PVQQADNR-----  
-----PKQ-----LVWRNIILFAYLHIAALYGGYLFLVHA---KWQ-  
TDIFAYLLYVMSG LGITAGAHRLWAHKS YKAKWPLRLILVVFNTMAFQDSAIDWARDH  
RMHHKYSETDADPHNATR GFFFSHIGWLLVRKHPELKRKGKGLDLS--  
DLYADPILRFQKKYYLILMPITCFVMPTVIPVYLWGESWVN AFFVAALFRYAFILNVTWL  
VN SAAHKWGD KPYDKSIKPSENISVSMFALGEGFHNYHHTFPWDYKTAELG-  
NNRLNFTTNFINFFAKIGWAYDLKTVSDEIIQ-QRVQRTGDGSH-----H-----  
-----LWGWGDKDHDKEEVNAAIRINPKDD-----

Onu\_Z9

-----MAP-----NIKDGADLNGVLFEDDASTP--DYALATA---  
PVQKADNY-----PRK-----LVWRNIILFAYLHLAAVYGAYLFLFSA---KWQ-  
TDIFAYILYVISGLGITAGAHRLWAHKS YKAKWPLRLILIFNTVSFQDSALDWSRDHRM  
HHKYSETDADPHNATR GFFFSHIGWLLVRKHPELKRKGKGLDLS--  
DLYADPILRFQKKYYLLL MPLGCFIMPTVVPVYFWGETWTNAFFVAALFRYTFILNVTW  
LVNSAAHKWGHKPYDSSIKPSENLSVSLFALGEGFHNYHHTFPWDYKTAELG-  
NNRLNFTTNFINFFAKIGWAYDLKTVSDEIIQ-NRVKRTGDGSH-----H-----  
-----LWGWGDKDQPKKEEVNAAIRINPKDE-----

Dpu\_Z/E9

-----MAP-----K---EADVNGVLFESDATTP--DMALPTT---PVQQADNY---  
-----PKK-----LVWRNILLFAYLHLAALYGGYLFLFSA---KWQ-  
TDIFAYILYIMSG LGITAGAHRLWAHKS YKAKWPLRLILVLFNTLAFQDSAIDWARDHR  
MHHKYSETDADPHNATR GFFFSHIGWLLVRKHPELKKKGKGLDIS--  
DLYADPILRFQKKYYLLL MPLGCFILPTVIPVYLWNETWSNAFLVAALFRYAVILNVTWL  
VN SAAHKWGD KPYDKSIKPSENLSVALFALGEGFHNYHHTFPWDYKTAELG-  
NNRLNFTTTFINFFAKIGWAYDMKTVSDEIIQ-NRVKRTGDGSH-----H-----  
-----LWGWGDKDHSKEEINAAIRINPKDD-----

Onu\_Z9\_b

-----MPP-----QG--AERDSFVLFESDAKDP---DVITH---MAPQAEKR-----  
-----QTQ-----IVWRNVAIFTYLHLGFLYGAYLMLTTV---MWK-  
TRLFCLILYVCSGLGITAGAHRLWAHKS YKAKLPLRIILTLFNTLAFQDAVVDWARDHR  
MHHKYSETDADPHNATR GFFFSHVGWLLVRKHPPQIKAKGHTIDMS--  
DLRADPVLR FQKKYYMYLMPLICFIMPSV VPA-  
LWGETVWNGYFTCAVFRYVAVLN GTWLVNSWAHLWGD KPYDRHINPVETKVVSVA A  
IGEGFHNYHHTFPWDYKAAELG-NYTFNITKFFIDTMATIGWAYDLKTVSTDVIQ-  
KRITRTGDGSH-----P-----VWGWGDKNIPEEDKKVTTVINPEKEE--  
-----

Bmo\_2\_AF182406

-----MPP----QR--KQEASWVLYEADANNL--PEDAPPH----VPPSAEKR---  
-----PWK-----IVWRNVILFFILHVGGVYGGYLFLFKA----MWR-  
TSIFAIFLYLCSGLGITAGAHRLWAHKSYPKARLPLRILLTIFNTIAFQDAVVDWARDHRM  
HHKYSETDADPHNATRGGFFSHIGWLLLRKHPEIKAKGHTVDVN--  
ELRNDPILRFQKKYYQILMPLACFIMPTYVPT-  
LWGETVWNSFYVCAIFRYVYVLNITWLVNSAAHMGWGSKPYPDKNINPVETRPVSLVVLG  
EGFHNYHHTFPWDYKTAELG-DYSLNLSKLFIDFMAKIDWAYDLKTVSTDVIQ-  
KRTKRTGDGSH-----P-----  
VWGYDVGEVATEDKTDTTNLVNSKVL-----

Epo\_Z9\_b

-----MPP----QG--QPPAAWVLEESDATTD--DKDVAVA----VPPSAEKR--  
-----KLS-----IVWRNVILFVLLHTGAVYGGYLFFTKA----MWA-  
TKFFAFFLYLCSGLGITAGAHRLWAHKSYPKARLPLRILLTLFNTIAFQDSVLDWARDHR  
MHHKYSETDADPHNATRGGFFSHVGVLLVRKHPPQIKAKGHTIDMS--  
DLCSDPVLRFQKKYYLTLMPLFCFILPTYIPT-  
LWGESLWNAYFVAAIFRYCYVLNVTWLVNSAAHKWGDRPYDKNINPVETKPVSLVVF  
GEGFHNYHHTFPWDYKTAELG-GYSLNLSKLFIDTMAKIGWAYDLKSVSPDIVE-  
KRVKRTGDGSH-----E-----  
VWGWDDKDVPAEQKAAATIINPEKTE-----

Tni\_Z9

-----MPP----QG--QTGGSWVLYETDAVNT--DTDAPVI----VPPSAEKR---  
-----EWK-----IVWRNVILMGMLHIGGVYGGYLFLTKA----MWL-  
TDLFAFFLYLCSGLGITAGAHRLWAHKSYPKARLPLRLLTLFNTLAFQDAVIDWARDHR  
MHHKYSETDADPHNATRGGFFSHVGVLLVRKHPPQIKAKGHTIDLS--  
DLKSDPILRFQKKYYLTLMPLICFILPSYIPT-  
LWGESAFNAFFVCSIFRYVYVLNVTWLVNSAAHLWGSKPYDKNINPVETRPVSLVVLGE  
GFHNHYHHTFPWDYKTAELG-DYSLNFTKMFIDFMASIGWAYDLKTVSTDVIQ-  
KRVKRTGDGSH-----A-----  
VWGWDDHEVHQEDKKLAAIINPEKTE-----

Has\_Z9\_b

-----MPP----QG--QTGGSWVLYETDAVNE--DTDTPVI----VPPSAEKR---  
-----EWK-----IVWRNVILMGMLHIGGVYGGYLFLTTA----MWR-  
TCIFAVVLYICSGLGITAGAHRLWAHKSYPKARLPLRIMTLFNTLAFQDAVIDWARDHR  
MHHKYSETDADPHNATRGGFFAHVGVLLVRKHPPQIKAKGHTIDLS--  
DLKSDPILRFQKKHYLFLMPLVCFILPCYIPT-  
LWGESLWNAYFVCSIFRYVYVLNVTWLVNSAAHLWGAKPYDKNINPVETRPVSLVVLG  
EGFHNYHHTFPWDYKTAELG-DYSLNLTKLFIDTMAAIGWAYDLKTVSTDVIQ-  
KRVKRTGDGSH-----P-----  
VWGWDDHEVHQEDKKLAAIINPEKTE-----

Sli\_Z9\_b

-----MPP----QG--QTGGSWVLYETDAVNV--DTEAPVI----VPPSAEKR---  
-----EWK-----IVWRNVILMGLLHIGGVYGGYLFLTTA----MWR-

TSLFAVFLYICSGLGITAGAHRLWAHKSYPKARLPLRILLTLFNTLAFQDAVIDWARDHRM  
HHKYSETDADPHNATRGGFFFSHVGVLLVRKHHPQIKAKGHTIDLS--  
DLKNDPILRFQKKHYLILMPLVCFILPCYIPT-  
LWGESLWNAYFVCSIFRYVYVLNVTWLVNSAAHLWGAKPYDKNINPVETKPVSLVVLG  
EGFHNYHHTFPWDYKTTELG-DYPLNLTCLFIDFMAAIGWAYDLKTVSSDVIQ-  
KRVKRTGDGSH-----A-----  
VWGWDDHEVHQEDKELAAIINPDKTE-----

Hme\_ctg2

-----MPP----QD--QQTGSWVLYEKD-LNK--NA--STS---VPPTAEKR----  
-----KWQ-----IVWRNVILFLLLHIGGVYGAYLFLMKA---MWA-  
TRIFAVVLYLCSGLGITAGAHRLWAHKSYPKAKLPLRILLTIFNTIAFQDSVLDWARDHRM  
HHKYSETDADPHNATRGGFFFSHVGVLLVRKHPEIKSKGHTIDMN--  
DLWSDPILRFQKKYYMLLMPVACFILPSYIPT-  
LWGESLWNGYFVAAIFRYVYVLNATWLVNSAAHKWGSKPYPDKNINPVETKPVSLVVL  
GEGFHNYHHTFPWDYKTAELG-DYSFNFSKLFIDGMSSIGWAYDLKTVSREVIE-  
KRIKRTGDGSH-----Q-----EFGYEDLSSSEDKFNKE-----  
-----

Ban\_delta9-like\_Lienard

-----MPP----QG--QQQGSWVLYESD-LNK--DATPPPL---VPPSAEKR----  
-----KWK-----IVWRNVILFMLLHLGGLYGAYLFLTQA---MWT-  
TRIFTVLLYLSSGLGITAGAHRLWAHKSYPKAKLPLRMLLTLFNTLAFQDSVLDWARDHR  
MHHKYSETDADPHNATRGGFFFSHVGVLLVRKHPEIKAKGHTIDMS--  
DLWADPVLRFQKKYYLILMPLVCFILPTYIPT-  
LWGESLWNAYFVSAIFRYVYVLNVTWLVNSAAHKWGSKPYPDKFINPVETKSVSLVVLG  
EGFHNYHHTFPWDYKTAELG-NYSLNFSKLFIDTMAKIGWAYDLKTVSPDVIE-  
KRVKRTGDGTH-----Q-----EWGFEELHKELHEHSQ-----  
-----

Ban\_delta11-like\_Lienard

-----MAP-----SATETTTITETE-----ETLPKL---VAPQAAPR-----  
--KYD-----IIFYNLLTFGYAHLATLYGVYLAETTA---TWK-  
TLMFHHVMFILAAVGITAGTHRLWSHRAKAKMPLQIILMVLNSFAFQNSAIQWVRDH  
RMHHRYSDTDADPHNATRGGFFYSHMGWLLVRKHPEMLRRGKFIDMS--  
DIYANPVLRFQKKYAI PVFGTLCFALPTLIPMYFFGETLNTAWHL-  
TIMRYVFNLHMTFLVNSAAHLWGNKPYDKNMLPAQNLPVSFIAFGEGFHNYHHAFPWD  
YKTAELG-NNWLNFSKTFIDFFAWIGWAYDLKEVPLEVAR-ARAERTGDGSN-----  
-----LWGFRDKTE-----

Ban\_delta9-like\_Arun\_ACO11.6.7

-----MPP----QG--QQQGSWVLYESD-LNK--DATPPPL---VPPSAEKR----  
-----KWK-----IVWRNVILFMLLHLGGLYGAYLFLTQA---MWT-  
TRIFTVLLYLSSGLGITAGAHRLWAHKSYPKAKLPLRMLLTLFNTLAFQDSVLDWARDHR  
MHHKYSETDADPHNATRGGFFFSHVGVLLVRKHPEIKAKGHTIDMS--  
DLWADPVLRFQKKYYLILMPLVCFILPTYIPT-

LWGESLWNAYFVSAIFRYVYVLNVTWLVNSAAHKWGSKPYDKFINPVETKSVSLVVLG  
EGFHNYHHTFPWDYKTAELG-NYSLNFSKLFIDTMAKIGWAYDLKTVSPDVIE-  
KRVKRTGDGTH-----Q-----EWGFEELHKELHEHSQ-----  
-----

Ban\_delta11-like\_Arun\_LOC692458.1.1

-----MAP----SA--TETTTITETEETLPKL-----VAPQAARR-----  
--KYD-----IIYFNLLTFGYAHLATLYGMYLACTTA---TWK-  
TLMFHHVFMFILA AVGITAGTHRLWSHRAYKAKMPLQIILMVLNSFAFQNSAIQWVRDH  
RMHHRYSDTDADPHNATRGGFFYSHMGWLLVRKHPEMLRRGKFIDMS--  
DIYANPVLRFQKKY AIPVFGTLCFALPTLIPMYFFGETLNTAWHL-  
TIMRYVFNLMHTFLVNSAAHLWGNKPYDKNMLPAQNLPVSFIAFGEGFHNYHHAFPWD  
YKTAELG-NNWLNFSKLFIDFFAWIGWAYDLKEVPLEVA-RARAERTGDGSN-----  
-----LWGFRDKTE-----

Bmo\_5\_AGO45855

-----MVE-----TKMEDGKQAATP-----AEEINLSN-----  
KRE-----ANWPAVLFFIIHLLSLYGIYLLIYEV---KWM-  
TVIFLITLTFPAILAMTTGAHRLWAHRTYKASTELRIVLMLLQTLAGVGPIYNWVRHHRL  
HHAHFATENDPFDYNQGFAYAHIFTRMRKLSPYQEKLKESIDMS--  
DLENDSVVMFQKTLYWFMYATLFLLLPLNAPLEYWEDSVLSSVFVIGFLRYFILLHASW  
LIESAICVWGLKPGEKSPDSNSVFIITRTF--WPH-YHYLIPYDYKSGEYG-  
TYDSGCSSAFIRVWAALGIATGLRTVETNTIQ-KALAEMAKTKK-----  
-----PLQICLENALKDQSLSDQHLYLKRE-----

Dpl\_ctg2

-----MPP----QG--QQSESWVLNETDLNKD----ADTPI---VPPSAEKR-----  
-----KLQ-----IVWRNVILFALLHIGGVYGYLFFTQA---MWS-  
TRLFAVVLYLCSGLGITAGAHRLWAHKSYPKARLPLRMLLTLFNTIAFQDSVIDWARDHR  
MHHKYSETDADPHNATRGGFFSHVGWLLVRKHPEIKAKGHTIDMS--  
DLKSDPVLRFQKRHYLLLMPLACFILPTYIPT-  
LWGETLWNAYFVCAIFRYVYVLNVTWLVNSAAHKWGDKPYDKNINPVETKPVSLVVL  
GEGFHNYHHTFPWDYKTAELG-HYQLNFSKLFIDFMATIGWAYDLKTVSTDVIE-  
KRVKRTGDGSH-----K-----EWGQEIKEKISQE-----  
-----

Poc\_Z10

-----MPP----N---SEETVLCEKE-----DHEKL---VAPQAATR-----  
---KHE-----LAIVPISLFTYWHVAGLYGLYLIFAEA---KWQ-  
TVVFTLFTYNAGILGITAGSHRLWAHKTYPKARPLETLLMVFHSLTSQNTVRHWARDH  
RFHHKYSDTDADPHNATRGGFFSHVGWLLVKKHPEVLRRSKTIDMS--  
DIYNNPVLRFQKNYGLPVITLFAVYLPALIPMYCWEETLNNAWHI-  
NLLRIIANLHASCLVNSAAHAFGNKPYDKHIAATQISTLSFITLGECFHNYHHVFPWDYR  
TAEGL-NNWLNMTTLFIDFFAWVGWAYDLKTASDGMVE-ARAKRTGDGTN-----  
-----LWGWGDEDLGREEGGEEVFYGWGDRDMKDTSGVRVYSQE-----  
-----

Onu\_Z/E11

-----MVP----Y---ATTADGHPEKDE-----CFEDN---EIKSNSLP-----  
---KLE-----ILYFNVMTFTFLHLSALYGLYLGFTSV---KWA-  
TIGLGIIFYFFAEIGITAGAHRLWSHRYSYKAKLPLEILLMVFN SMAFQNTALSWARDHRV  
HHKCPDTNGDPHNANRGFFYSHVGWLMTKKSDEVIKQGKLCDDVA--  
DLYSNPVLRFQKKYAVPFIGTLCFVLP TLIPMYFWGETLNNAWHF-  
NMFYRVINLNATFCVNSV VHKWGYKPYDKNICPTQNVLLNLAVLGEAFHNYHHVFPW  
DYRAAELG-NQKMNP TTLFIDFFAWIGWAYDLKTASKEMIK-SRSERTGDGTD-----  
-----LWGH SADKLK-----

Ape\_Z11

-----MAP----Y---TEKEDELITCEG-----SIEKL---IAPQANKR-----  
--KHQ-----IVYMNLF TFGYWYIAGLYGLYLFFTST---KWS-  
TIILNIFLIASGLGITVGAHRLWAHKCFKAKLPLQIILMILNTLAFQNTAITWVRDHRMH  
KFTD TDADPHNATR GFFFSHVGWLLVKKHPELMKRSKHIDMS--  
DIYGNPVLTFQKKYAFPLVATFTFILPTVVPIYFWDESLNNAWHA-  
TVFRYAYNLNITFLVNSAAH MWGYR PYDKNIQPTQNI FTTLCTFGEGFHNYHHTFPWDY  
RAAELG-NNYLN LSTKVIDFFAWIGWAYDLKTVPADIVN-SRAKRTGDGTD-----  
-----LWGGNHKHTLDEKENRELD DYVHKSAF-----

Mse\_Z11/10-12

-----MAP----N---FGTEMSAHIDAE--E-----SYGKL---IPPQAAPR-----  
---KYK-----YLYANMIYFAYWHIAGLYGIYLAFTSA---KWA-  
TIILAYLLFVAGDIGVTAGAHRLWAHKS YKAKLPLQILLMLFSTMAFQNTVITWVKDHR  
MHHKYS DTDADPHNATR GFFFSHVGWLMV KRHPEAIKRGKSLDMS--  
DIYNNPVLKFQKKYAIPLVT TIAFVLPTIIPMYFWDESFSVAWHM-  
TMLKYIFGLNAAFLVNSVAH MWGYKPYDKNIAPTQSYIATFATLGEGFHNYHHVFPWD  
YRASELG-DNYLNFTTKFIDFFAWIGWAYDLKAAPEDLVQ-  
KRIERTGDGTKLLNL TTKFIDFFAWIGWAYDLKTVPEDLLQKRMERTGDGTNLWGRGD  
KNMKKD YVKSTDDHE-----

Bmo\_Z11/10-12\_BAD18122

-----MPP----NSVDKTN ETEYLKDNH-----VDYEKL---IAPQASPI-----  
-----KHK-----IVVMNVIRFSYLHIAGLYGLYLCFTSA---KLA-  
TSVFAIVLFFLG NFGITAGAHRLWSHNGYKV KLPLEILLMVFN SIAFQNTIFTWVRDHRL  
HHKYTD TDADPHNATR GFFFSHIGWLLVRKH PMVKIAGKSLDMS--  
DIYCNPLLRFQKKYAI PFIGTICFIPTLAPMYFWGESLNNAWHI-  
TVLRYIFSLNGTFLVNSAAHLWGYKPYDKSLKATQSGMANAFTFGEGFHNYHHVFPWD  
YRADELG-DRYINLTTRFIDFFAWMGWAYDLKTASTNII E-KRALRTGDGTY-----  
-KR-----PNGMN-----

Lca\_Z11

-----MPP-----YP EVDTKHIFEEDISHEESKPALKPL---VAPQADNR----  
-----KPE-----IVPLNLITFGYGH LAIYGIYLCFTSA---KWA-  
TIVFAFVLYICAELGITAGAHRLWSHRYSYKAKLPLRLILL LFN TLAFQNTAIDWVRDHRM

HHKYSDTDADPHNATRGGFFSHVGVLLTRKHPEVKKRGKDIDMM--  
DIYNDSLLKFQKKYAIPFVGLVCFVIPTLMPMYFWNETLNNSWHIATMLRYIVNLNMTF  
LVNSAAHIWGYKPYDKSIKPVQNITVSILILGEGFHNYHHVFPWDYRTSELG-  
NDFLNFTTLFINLFAKIGWAYDLKTASDKVVA-ARRKRTGDGTN-----  
-----LWGWEDKSLMKKATAATVLYPNKYLNLD-----

Dpu\_Z/E11\_2

-----MPP-----NTETFKKLKISEENLE----QFPKL----VAPQAAPR-----  
----KYE-----IIYINVLTFSYWHLAAFYGIYLCFTSA----KWT-  
SVFFVFLYCTMGEVGVTAGSHRLWSHKSYKAKLPLQIILMTLSSIAFQNSVIDWVRNHRT  
HHKYSDTDADPHNATRGGFFSHIGWLLVRKHSQTKLRGKTIDMS--  
DIYNNSVLRFQKKYAIPFIGTICFVLPVLPIMYCWNESFINAWHL-  
NMLRYCLSLNFTFLVNSAAHLYGNKPYDKNILPAENKAVSFLTLEGGFHNYHHTFPWD  
YRAAELG-NNKLNLTTKFIDFFAWVGWAYDMKTVSDDMIR-SRAKRTGDGSI-----  
-----IWDDGKETIEMGDVSDAIVIKNE-----

Epo\_E11

-----MAP----N---VEEIETDLTETE-----EKWEKL----VAPQAAPR-----  
----KHE-----ILYTNLLIFGYGHLAGLYGLYLCFTSA----RLQ-  
TIILAFILHAMAILGITAGAHRLWTHRSYKATMPLQIILIIFNSLSFQNSAINWVRDHRSHH  
KYCDTDADPHNAARGLFYSHIGWLLVKKHPEVKKRGKMTDMS--  
DVYRNPVLRQKKYAVPFIGTICFVLPPTIIPMYFWGESLNNAWHI-  
TLLRYIFSMHTIFLVNSVAHLWGNRPYDKNILPADNRTLSTLGEASHNYHHTFPWDYR  
STELG-YLPTNFTTNFIDFFAWIGWAYDLKTTSGEIIN-SRIQRTGDGTH-----  
-----SRSKKNISTQDE-----

Ave\_Z/E11

-----MAP----N---AEDIETNMPETE-----ENWETL----VAPQAAPR-----  
----KYQ-----IVYKSLLTFGYGHLAGLYGLYLCFTSA----KWQ-  
TIGLAILHAMAILGITAGAHRLWTHRAYKATVPLQIILIIFNSLSFQNSAFTWIRDHRLHH  
KYSDTDGDPHNATRGGFFYSHIGWLLVRKHPEVMKRGKMTDMS--  
DIYSNPIIMFQKNYAIPFIGTVCFVLPTIIPMYFWGETLNNAWHI-  
TVLRYIFSLNCIFLVNSAAHLYGYKPYDKNILPAENKAASIASFGEAFHNYHHVFPWDYR  
ASELG-NITMNWTIYFIDFFAWIGWAYDLKTASDETIK-SRIKRTGDGTD-----  
-----FSGQQIYAR-----

Cpa\_E11

-----MAP----N---VEDMESDMPPESE-----KWEKL----VAPQAAPR-----  
----KYE-----IIYTNLLTFGYGHIAGLYGLYLCFTSA----KWQ-  
TVILAILNEMAILGITAGAHRLWSHRSYKAAVPLQIILMIFNSLAFQNSAINWVRDHRMH  
HKYSDTDGDPHNASRGFFYSHVGVLLVKKHPEVKKRGKMTDMS--  
DIYSNPVLRQKKYAIPFIGMICFVLPPTIIPMYFWGETLSNAWHI-  
TMLRYVFSLSIFLVNSAAHLYGYRKYDKNILPAENKIALIACLGDSFHNYHHVFPWDYR  
ASELG-NIGMNWTAQFIDFFAWIGWAYDLKTASDENIN-SRMKRTGDGTD-----  
-----ISGQKYSCESEVLQ-----



Tni\_Z11

-----MAVMAQ-----TVQETATVLEEEARTV-----TL----VAPKTTPR-----  
-----KYK-----YIYTNFLTFSYAHLAALYGLYLCFTSA----KWE-  
TLLFSFVL FHM SNIGITAGAHRLWTHKTFKAKLPLEIVLMIFNSLAFQNTAITWAREHRLH  
HKYSDTDADPHNASRGFFYSHVGWLLVKKHPDVLKYGKTIDMS--  
DVYNNPVLKFQKKYAVPLIGTVCFALPTLIPVYCWGESWNNAWHI-  
ALFRYIFNLNVTFLVNSAAHIWGNKPYDKSILPAQNLLVSFLASGEGFHNYHHVFPWDY  
RTAELG-NNFLNLTTLFIDFCAWFGWAYDLKSVSEDIK-QRAKRTGDGSS-----  
GV-----IWGWDDKDMDRDIKSKANIFYAKKE-----

Tpi\_Z11/11-13

-----MAP-----NTRENETIYDEV-----EHKLEKL----VPPQAGPW-----  
-----NYK-----IVYLNLLTFSYWLIAGAYGLYLCFTSA----KWA-  
TIIFEFILFFFAEMGITAGAHRLWTHKSYKAKLPLEIFLMVLNSVAFQNTATDWVRDHRL  
HHKYSDTDADPHNAARGLFFSHVGWLLVRKHDEVKKRGKFTDMS--  
DIYNNPVLKFQKKYAIPFIGAVCFILPTVIPMYFWGESLNNAWHI-  
CILRYAMNLNVTFSVNSLAHIWGNKPYDKDIKPAQNFGVTLATFGEGFHNYHHVFPWD  
YRTSELG-DNKFNFTTKFINFFERIGLAYDLKTVSDDVIA-QRAKRTGDGTH-----  
-----LWDCADKNNNDVVQTKAQIDTLCTKHE-----

Che\_Z/E6

-----MPP-----NTKEKEMNKLAGISGRNEE-----LAPQAAPR-----  
-----KFE-----IVYRNIVTFSFMHVAGLYGLYLCFTSA----KWQ-  
TIVLAFVLYTFAEIGVTAGAHRLWAHKTYKAKTPLQIILMVLNSIAFQNSAIGWVRDPRL  
HHKYSDTDADPHNATRGGFFYSHVGWLLVRKHPEVIKRGKTMEMS--  
DIYSNPVLWFQKKYAVPFIGIICFGLPTLVPMYFWGETLNNAWHI-  
TMLRYIANLNVTFLVNSAAHMFNGKPNKNILPAQNISVSILTFGEGFHNYHHVYPWDY  
RTAELG-NNMLNMTTLFIDFFAWIGWAYDLKTVSSAAIE-SKAKRTGDGTN-----  
-----LWGWGDKDMLREDQKAAEILFARLK-----

Sli\_Z11/10-12

-----MAQ-----CVQTTTILEQKEEKTV-----TL----LVPQAGKR-----  
-----KFE-----IVYFNIITFAYWHIAGLYGLYLCFTST----KWA-  
TVLFSFFLFVVAEVGVTAGSHRLWSHKTYKAKLPLQILLMVMNSLAFQNTVIDWVRDH  
RLHHKYSDTDADPHNASRGFFYSHVGWLLVRKHHPDVKKRGKEIDIS--  
DIYNNPVLRFQKKYAIPFIGAVCFVLPTLIPVYGWGETWTNAWHV-  
AMLRyimnlNVTFLVNSAAHIYGKRPYDKKILPSQNIASVIAATFGEGFHNYHHVFPWDY  
RAAELG-NNSLNFPTKFIDFFAWIGWAYDLKTVSKEMIK-QRSKRTGDGTN-----  
-----LWGLEDVDTPEDLKNTKGE-----

Has\_Z11

-----MAQ-----SYQSTTVLSEEKEPTL-----TH----LVPQASPR-----  
---KYQ-----IVYPNLITFGYWHIAGLYGLYLCFTSA----KWA-  
TILFSYILFVLAIEGITAGAHRLWAHKTYKAKLPLELLLMVFNSIAFQNSAIDWVRDHRLH  
HKYSDTDADPHNASRGFFYSHVGWLLVRKHPEVKKRGKELNMS--

DIYNNPVLRFQKKYAIPFIGAVCFALPTMIPVYFWGETWSNAWHI-  
TMLRYIMNLNVTFLVNSAAHIWGNKPYDAKILPAQNVAVSVATGGEGFHNYHHVYPW  
DYRAAELG-NNSLNLTTKFIDFFAAIGWAYDLKTVSEDMIK-QRIKRTGDGTD-----  
-----LWGHEQKCDKGSVNDKLS-----

Mbr\_Z11

-----MDQ-----SVRTTILRGKEEPTL-----TW----LVPQASPR-----  
---KYQ-----IVYPNLITFGYWHIAGLYGLYLCFTSA---KWQ-  
TMIFSILFVLAIEGVTAGAHRLWAHKTAKLPLQILLMILNSIAFQNSAIDWVRDHRHLH  
HKFSDTDADPHNATRGGFFYSHVGWLLVRKHPEVKRRGKELDMS--  
DIYNNPVLRFQKNYAIPFIGAVCFGLPTLIPVYCWGETWSTAWHI-  
TMFRYVMNLNVTFLVNSAAHIWGKKPYDKKILPAQNIASVATCGEGFHNYHHVFPWD  
YRAAELG-NNSLNLTTKFIDFFAWIGWAYDLKTVSQDMIK-HRALRTGDGSN-----  
-----LWGLEDKYVCEKNEGKDE-----

Yev\_Z/E11

-----MPP-----NSANSEPLLHDEVKEE---QLEKL---VAPQAGPR-----  
-----KFQ-----IVYPNLITFGYGHISLLYGAYLMFTFA---KWQ-  
TIVFAHVMILSGFGITAGAHRLWAHRTYKAKMPLQILLMLLNTLAFQNTAMDWVRDH  
RLHHKYSDDTDADPHNATRGGFFYSHVGWLLVRKHKEVKRRGKLIDLS--  
DIENNPVLSFQKKYAIPVSLVTFVMPTVIPMYFWGETLTNAWHVATLYRYVFLNATF  
LVNSAAHYWGYKPYEKSILPSQNHVSLFALGEGFHNYHHVFPWDYRTAELG-  
NNTLNPTTKFIDFFAWIGWAYDLKAVPDDMIN-NRKSRTGDGSS-----  
-----LWGWGDKDQPKKEEMNAAIKYPDENDKDK-----

Ypa\_Z/E11

-----MAP-----NSANSEPLLHDEVKEE---QLEKL---VAPQAGPR-----  
-----KFQ-----IVYPNLITFGYGHISLLYGAYLMFTFA---KWQ-  
TIVFAHVMILSGFGITAGAHRLWAHRTYKAKMPLQILLMLLNTLAFQNTAMDWVRDH  
RLHHKYSDDTDADPHNATRGGFFYSHVGWLLVRKHKEVKRRGKLIDLS--  
DIENNPVLSFQKKYAIPVSLVTFVMPTVIPMYFWGETLNNAWHVATLYRYVFLNVT  
LVNSAAHYWGCKPYEKSILPSQNHVSLFALGEGFHNYHHVFPWDYRTAELG-  
NNTLNPTTKFIDFFAWIGWAYDLKAVPDDMIN-NRKSRTGDGSS-----  
-----LWGWGDKDQPKKEEMNAAIKYPDENDKDK-----

Bmo\_10\_AGO45852

-----MSP-----NIATIVPSQETE-----NEYEKL---EPPQASER-----  
-KYE-----IIFYNIFTFTFAHLSALYGVYLCFTSA---KRE-  
SLILGYIIGVLAGFGVTAGAHRLWTHRTYKAKMPLQILLMLFYSFAYQNSAVHWIRDRH  
LHHKYSDDTDADPHNATRGGFFYSHMGWLLVKKHPEVKRRGRSLDMS--  
DIYSNRVLMFQKKYAIPITGTICFVIPTLLPMYLWGESFKNAWHI-  
TILRYIITLHVAFLVNSAAHIWGYKPYDKRILPTQNLVFSFMAFGEGFHNYHHVFPWDYR  
TAEGL-NNYLNLTMTFIDFFAWLGWAYDLKSVPSLAESRARKTGDGTG-----  
-----LWGWGDKDMSDLKRQTVGEN-----

Dpl\_ctg1

-----M-----S---CDETEESKSDD-----VFEKL---VAPQAAPR-----  
-KYE-----IIHSNLLTFSYGHLLAALYGTLYLCVTVA---SWK-  
TLLFHFIIIFVLAAIGVTAGAHRLWTHRAYKAKLPLQIILMLMNTLAFQNTVIDWVKKHRL  
HHRYSDTDADPHNATRGGFFYSHVGWLLVKRHEEVRRREKLIDMS--  
DIYDNPVLTFFQKKYAVPFIGTLTFVLPTLIPMYFFGETFTAWHL-  
TVLRYILNLNGTFLVNSAAHMFNGKPYEEHIKPSQNLVSVFVSFGEGFHNYHHVFPWDY  
RTAELG-NNYLNLTTFIDFFAWLGWAYDRKTIPDDLIR-SRSKRTGDGTN-----  
-----SWGFSKTE-----

Bmo\_9\_BAD18124

-----MEA-----KQNNLAPTLEEE-----AQFEKL---IAPQASDR-----  
---KHE-----IIYANLITFAYGHISALYGLYLCFSSA---KWA-  
TIIMAYVILIAAEVGVTAGAHRLWTHRAYKAKRPLQIILMVMNSFAFQNSAITWIRDHR  
MHHRYSDTDADPHNATRGGFFYSHIGWLLVRKHPEVKRRGKTIDMS--  
DIYSNPVLVFFQKKYAIPIFIGAVCFVIPTLVPIYFWGETLTNAWHI-  
TLLRYIISLHVTFVLVNSAAHLWGTRAYDKRIFPAQNLIIVSLLAVGEGFHNYHHVFPWDYR  
TAEELG-NNYLNLTTFIDFFAWLGWAYDLKSVPSASVQ-SRAARTGDGTN-----  
-----SWGWPEDANEDILKQTPPL-----

Hme\_ctg0

-----MSP-----YIESTTTTTTTEEPLVD---HYEKL---VAPQADNR-----  
-----KYE-----IVYQNLITFGYGHAAALYGLYLACTSA---TWS-  
TIIFHYILFAAASIGITAGAHRLWTHRAYKAKMPLQIILLVMNSLAFQNTAITWVRDHRLH  
HRYSDTDADPHNATRGGFFFSHMGWLLVRKHPEVKRRGKFIDMS--  
DIYANPVLTFQKKYALPFIGTICFVLPTIIPMYFWGETLSTAWHL-  
AVLRYVCNLHNAFLVNSAAHMGWGNKPYDKSIQPAQNLAIVSILAFGEGFHNYHHVFPW  
DYKTAELG-NNYLNATTYFIDFFSRLGWAYDLKSVSEDHIQ-SRSSRCGDGSD-----  
-----SWGLKS-----

Hme\_ctg1

-----MSP-----CTGTLLIGTTTEEPLVD-HYEKL---IAPQAEPR-----  
-----KYD-----IVYESVTVVYLHAAALYGLYLACSTA---TWS-  
TLIFHNILFALATLGVTAGAHRLWTHRAYKAKMPLQLILIVLNSLAYQYTAITWIRDHRL  
HHRYSDTDADPHNATRGGFFFSHMGWILVRKHSEVKRRGKFIDMS--  
DVYANPVLRFQKKYALPFIGTICFVLPTIVPIYFWGESLNTAWHL-  
AILRYVCNLHNTCFVNSLAHLWGNKPYDKSIKPSNLVISFLTLGEGFHNYHHVFPWDY  
KTGELG-NNFLNVTTFYFIDFFAWLGWAYDLKSVSEEHQ-SRSSRCGDGSD-----  
-----SWGKGY-----
