# Supplementary material for: Mosaic Evolution of Molecular Pathways for Sex Pheromone Communication in a Butterfly
Source: MDPI journal article supplement (doi:10.3390/genes13081372), 2022-07-31
Supplement: s1 [file s1]

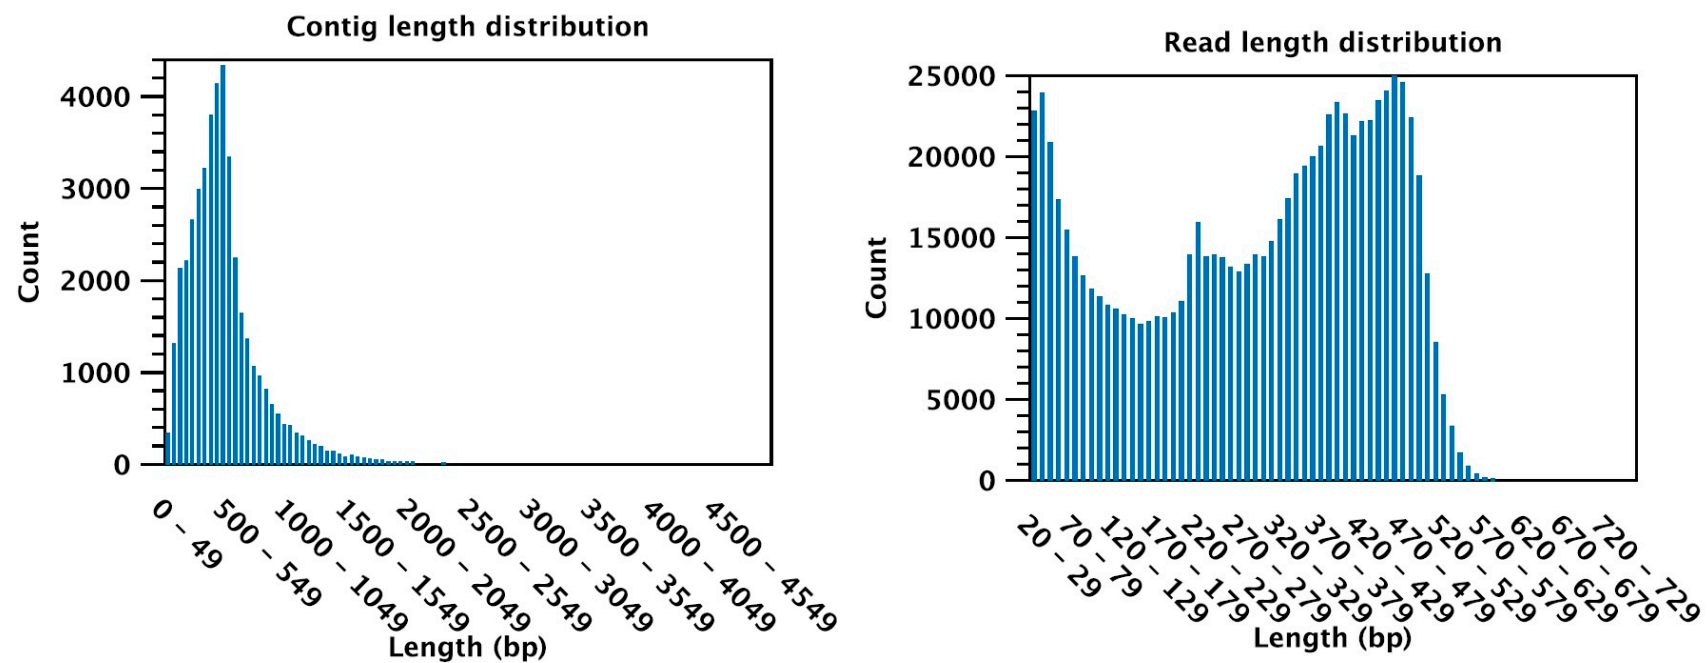

**Supplementary Figure S2:** Contig and read length distribution with counts on the y-axis and length (in base pairs) on the x-axis.
