# Supplementary material for: Mosaic Evolution of Molecular Pathways for Sex Pheromone Communication in a Butterfly
Source: MDPI journal article supplement (doi:10.3390/genes13081372), 2022-07-31
Supplement: s1 [file s1]

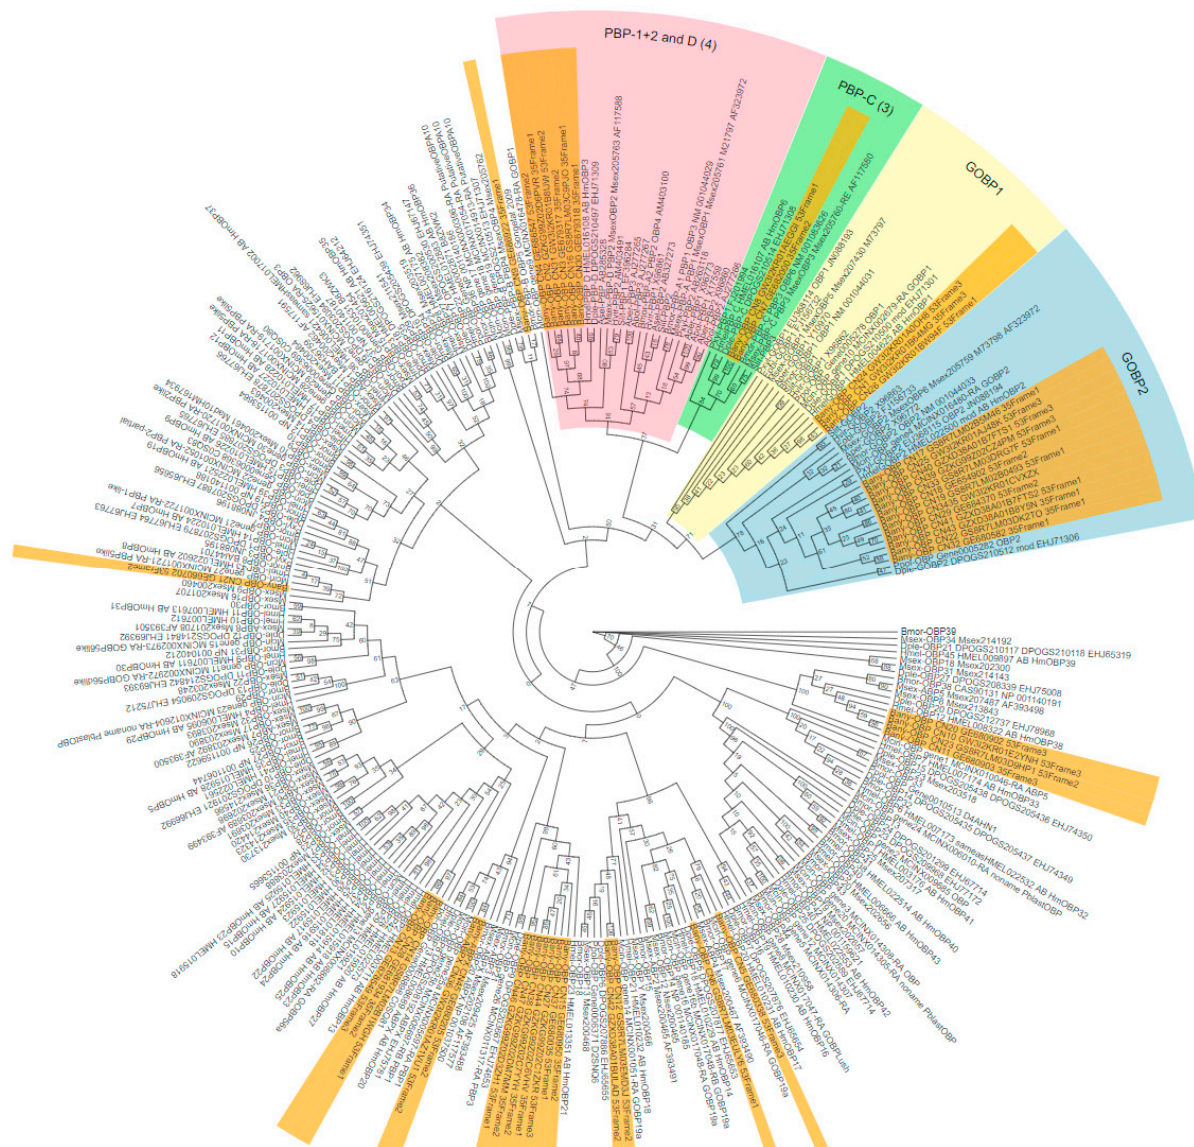

**Supplementary Figure S6:** Phylogenetic tree of OBP gene family from a representative set of other moths and the butterflies *Heliconius melpomene* (51 OBP), *Melitea cinxia* (32 OBP), *Danaus plexippus* (32 OBP), *Papilio polytes* (9 OBP) and *Bicyclus anynana* (47 contigs).
