# Supplementary material for: Mosaic Evolution of Molecular Pathways for Sex Pheromone Communication in a Butterfly
Source: MDPI journal article supplement (doi:10.3390/genes13081372), 2022-07-31
Supplement: s1 [file s1]

## PRODUCTION

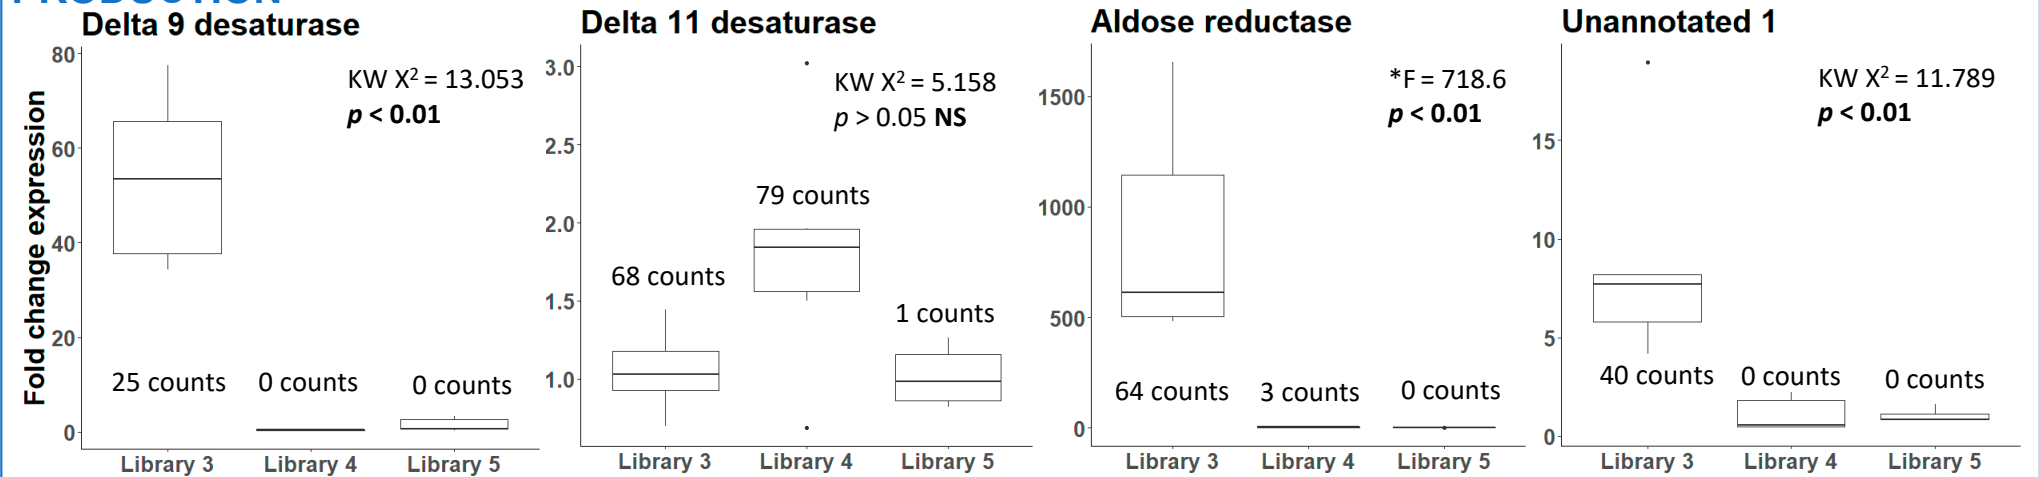

## RECEPTION

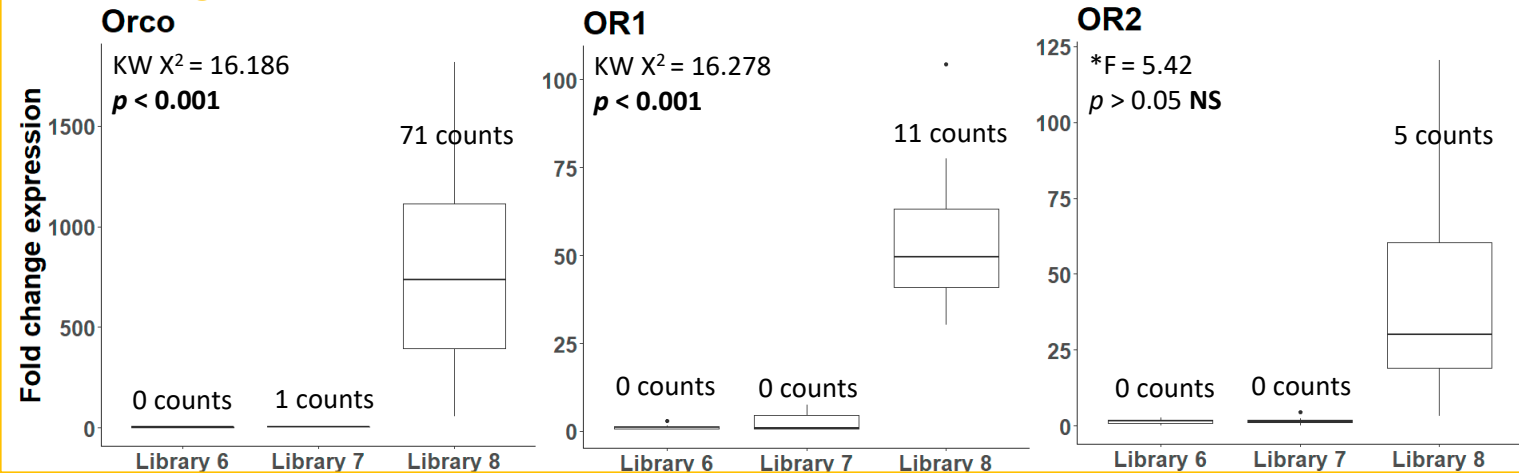

## DEVELOPMENT

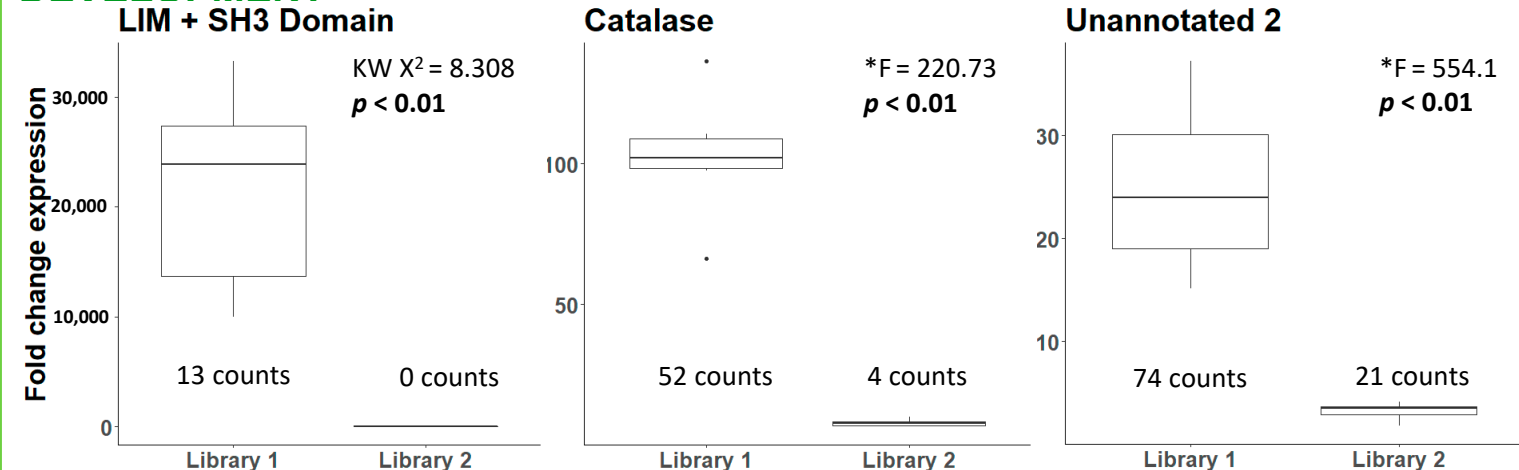

**Supplementary Figure S3: RT-qPCR validation of transcriptome data comparing the relative expression level of a subset of candidate genes between treatment and control libraries. \*log transformed data was used. KW  $\chi^2$  refers to the nonparametric Kruskal Wallis chi-square test statistic. F refers to the parametric F statistic. Significant differences are indicated in bold.**
