# Supplementary material for: Mosaic Evolution of Molecular Pathways for Sex Pheromone Communication in a Butterfly
Source: MDPI journal article supplement (doi:10.3390/genes13081372), 2022-07-31
Supplement: s1 [file s1]

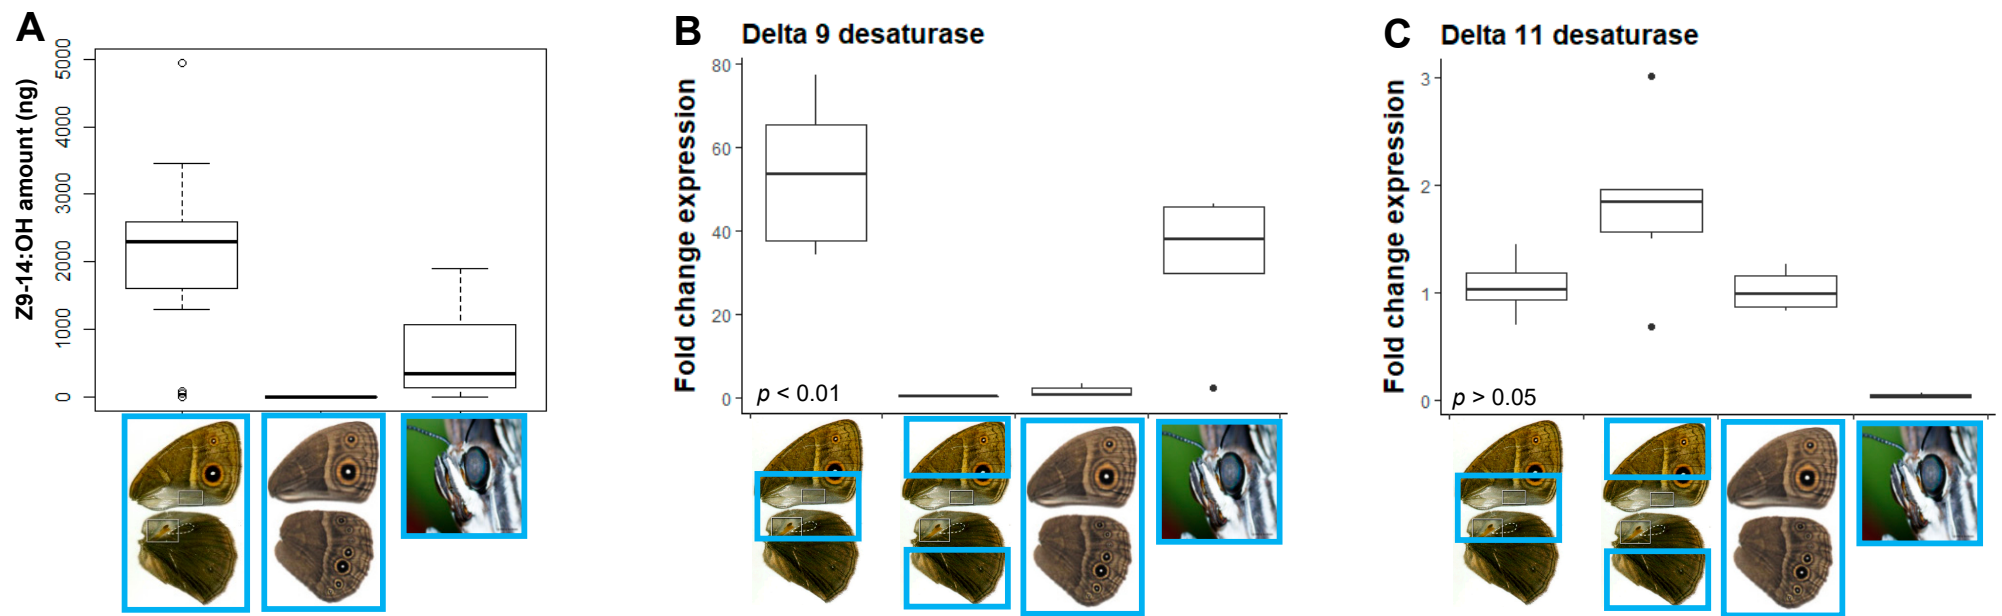

**Supplementary Figure S5:** Boxplots showing the spatial distribution of MSP1 (Z9-14:OH) and fold change expression of candidate genes  $\Delta 9$ - and  $\Delta 11$ -desaturase across the *B. anynana* body. (A) Amount of MSP1 (in ng/individual) with, from left to right, male wings, female wings and male heads. Data modified after Table S1 in [43]. (B, C) RT-qPCR of  $\Delta 9$ - and  $\Delta 11$ -desaturase genes with, from left to right, male androconial wing tissues, male control wing tissues, female wings and male heads.
