# Supplementary material for: Mosaic Evolution of Molecular Pathways for Sex Pheromone Communication in a Butterfly
Source: Genes (Basel). 2022 Jul 31;13(8):1372. doi: 10.3390/genes13081372 (PMC9407440; doi:10.3390/genes13081372)
Supplement: Supplementary file 1 [file genes-13-01372-s001.zip › Supplementary File S5 Table 1.xlsx]

## Sheet: Supplementary File S5 Table 1
OR gene	orf length (bp)	protein length (aa)	best Hit BastP	Predictive number of Transmembrane(TM) domains			Predicted topology	In silico predited CDS sequence
				TMHMM software	TOPCONS software	Octopus software	N-terminal location
OR1	1254	417	OR35_Bmor	7	7	7	intracellular	ATGGCGCTGAAGGAGATGTGGGCAACTCTCCAAACGTTCCGAGTGGAAGAAGACAGCTTCCCAATGATGATAGAAAACGTCGCCCTGTTGCTGCGAACGATGATCATAAATATCTTCAATCATAATAAATACAAGATGTACTGGTTCTACTACGTGGTGACGTTCATCTCCGGGGTCTGCTACTGCTACGTGTTCATCATCTCCATGCTGTGGATGGTGTTCGTGCGCTATCGGAAGACCAAGAACTACACAGCAATGGCCGCCGCCgtgtCGCTTACGTCCTGCAATGTCACTTGCATTACTAAGTTCCTCTTTATGATAATACACGTAACTCACATCAGAGATATAACTGAAAAGTATGTAAAATTCGACTCCCAGTTCGAACCTGAATCTAGATTT…
OR2	1299	432	OR64_Cher	7	6	7	intracellular	ATGGTAGTGCAAAGTTTGAAAAATATCTTTCTGAAGAGTTACTTTGATTATGGCAGCCCTTTTGATCTTTTTAAATTTCATCCACAACTAAGAATTTGTCTCATGCTAAATGGAATATTTTTTAATAATTCCGAGTCTCCTCTGAGATTTATTTTTCCAGTATTAAGCGGTACCGTGTCATTAATAGCGGCATCATTAGAAGCGATCTTCATTTATCACGGAGTAGCAGTGAAGGATTATTCGTTTGCAACAGAATGTTTCTGTTATTTCATCATTTTAACTATCATTCCCTTGATTTATACAAGTATGATTTTAAATAGGAAGAAGATCATGGATCTTCTTAACTCTATGAACAGGGATTTTCTGTATGTTTGCAGTTTGGGGTCGAAGTATAGAAAC…
OR3	1248	415	CSP20_Dple	8	8	8	intracellular	ATGTTTTGTTGGAACACGAAGCCGAGGACGCAGACTACGCCAACATGCGAGCGAGGCGATGGCCGCAGGAGGGTCAGGAGTCTGATGCAGACGTACACGATGTATATGTTTTTCCTAACTCTGGCAATGATGTATCCCAACCCACATCCACGGAATGAACAGAAGAGGAAGAGGATTATCATTATTTACATACTGACCGTGGCGCCCGCTCTCGTGATCGTGGGCTCCGACATGCGCTCGCGCATCGTGAACAACGACATGGCCAACCTGGTGCGGCAGTCCATCATCATGGTGTCCCTCGTGTTTACCATCATAAAGCTAATACTGACGGTGACACGGAAGAAAGAGCTGGGAGAACTCATCGCTGAGATAGACTGCGACTACGAGACGTTCAATGAC…
OR4	1194	397	OR_Harm	7	6	7	intracellular	ATGTTTGAAACCTTTGAGGCATTTCGACCCCATTTTAATGCATTAGCAAGGGTTGGATATTTTAAAATTGTTAGCAAACCTGTGACAGATAGGAAATATAAGTTGCATTATTATTATCGTGTTTTAATTTGGATCTTTGTCGTTACTTACAACGCACAACTCGTAATTCGGTCTATTCAGACACTGCACTGCACTGAACAACTATTGGGGACGTTGTTCATACTACTGACCACTTTGAATACACTTGGTAAACAAATGGCTTTTAATTTGCGCGTCCGACGGATCGACAACATCATTGATGTTATTAAAGGTCCAGCTTTCGCATCCCATAATTCATTTCATGAGGAGATAGCAAGATCTAATGCTGTGTCGATGACTCGCCTTCTTAAACTATATCAT…
OR5	1203	400	OR66_Cher	8	5	6	intracellular	ATGGATTCCTCGACTCAAAATTACAATCCAAATAAAACATCAATATACTTCTCCAAAGTAGGCAAGTTGTTAACGATCGGTGGGTTGCCGGGATGCGTGAGCTGGTATGAGAGCAGTAATAAGCCTGTGTATAAATACATACAAACATGTGTCACTGTCTTGGTTTTACTGTCCGTCGCGAATGAGGTCGGGGCTTTCTTCACGCAGACAAACTTGACGGAAAAGCAACGAGCTGACATGACGCTCGTCAGCTTTTCCCAGCCGTTGCTAACCAGCTACTACTTCATAATAAGATACTACAAAGGGAATGTCAAGGACGTAATGTATACACTGTGTGTCTCGCTGAAGAAGGTCTACAACGACCCCGAAGTTGAGAGGCGGATGATTAGACACAGCACT…

## Sheet: Supplementary File S5 Table 2
Gene	No of sequences analyzed	Polymorphism and Divergence
		No of polymorphic segregating sites	No of Synonymous Substitutions	No of Non-Synonymous Substitutions	Pi(a)/Pi(s) ratio	Nucleotide diversity per site (Pi)
OR1	14	12	8	4	0.064	0.00258
OR2	10	62	13	49	1.202	0.01391
OR3	16	24	14	10	0.222	0.00246
OR4	3	24	18	6	0.1	0.0134
OR5	15	12	5	7	0.435	0.00136
