# Supplementary material for: Mosaic Evolution of Molecular Pathways for Sex Pheromone Communication in a Butterfly
Source: Genes (Basel). 2022 Jul 31;13(8):1372. doi: 10.3390/genes13081372 (PMC9407440; doi:10.3390/genes13081372)
Supplement: Supplementary file 1 [file genes-13-01372-s001.zip › Supplementary Table S1.xlsx]

## Sheet: Supplementary Table S1
	Libray 1	Library 2			Library 3	Library 4	Library 5	Library 6	Library 7	Library 8
Sampled sex	male	male	female		male	male	female	male	female	male	female
Sampled tissue	imaginal wing disc				adult wing			adult brain		adult antenna
Life stage (nb days after pupation)				Life stage (nb days after emergence)
1	9.88714	4.94357	4.94357	1	17.35	17.35	17.35	13.7355	13.7355	4.39212	4.39212
2	4.23158	2.11579	2.11579	3	5.5715	5.5715	5.5715	6.22255	6.22255	4.42139	4.42139
3	4.19067	2.09534	2.59034	5	2.89185	2.89185	2.89185	4.93146	4.93146	3.25898	3.25898
4	0.990001	0.990001	NA	8	3.03408	3.03408	3.03408	6.2418	6.2418	1.16	1.16
5	3.16125	1.58062	2.92842	10	2.83217	2.83217	2.83217	4.33237	4.33237	1.38095	1.38095
6	2.69559	1.34779	NA	14	3.54391	3.54391	3.54391	4.79267	4.79267	0.997518	0.997518
7	1.92197	0.960987	0.960987
Final RNA tube (total RNA in µg)	27.0782	27.5732			35.2235	35.2235	35.2235	40.2563	40.2563	31.2219
