# Supplementary material for: Mosaic Evolution of Molecular Pathways for Sex Pheromone Communication in a Butterfly
Source: Genes (Basel). 2022 Jul 31;13(8):1372. doi: 10.3390/genes13081372 (PMC9407440; doi:10.3390/genes13081372)
Supplement: Supplementary file 1 [file genes-13-01372-s001.zip › Supplementary Table S2.xlsx]

## Sheet: Overexpr_Lib1-Lib2
#pool1LibNames : RL1_GS8R7LM02	RL1_GS8R7LM03	RL1_GZKG99Z02	RL1_GZXD38A01	RL1_GZXD38A02
#pool2LibNames : RL2_GS8R7LM02	RL2_GS8R7LM03	RL2_GZKG99Z02	RL2_GZXD38A01	RL2_GZXD38A02
#total reads pool1 : 29790
#total reads pool2 : 30950
#contigName	countPool1	countPool2	overexp.	p-value	qvalue	length.bp	e.value	blast.identity	blast.sequenceID	blast.name	type
BA_contig_099680	52	14	pool1	8.44123e-07	0.000288027	770	0	0.97	XM_024096446.1	PREDICTED: Bicyclus anynana neuropeptide-like protein 29 (LOC112056102), mRNA	1
BA_CPH17.32.50	266	134	pool1	1.89857e-12	1.81389e-09	539	4e-166	0.99	XM_024080946.1	PREDICTED: Bicyclus anynana calphotin-like (LOC112044932), mRNA	2
BA_CPR129.22.28	118	66	pool1	4.36908e-05	0.00773003	1067	0	0.94	XM_024098873.1	PREDICTED: Bicyclus anynana cuticle protein 8-like (LOC112058164), mRNA	2
BA_CPR57.6.8	95	39	pool1	3.57276e-07	0.000142226	1855	0	0.98	XM_024084164.1	PREDICTED: Bicyclus anynana cuticle protein 7-like (LOC112047155), transcript variant X2, mRNA	2
BA_contig_087350	93	49	pool1	9.76836e-05	0.0155545	676	0	0.96	XM_024083878.1	PREDICTED: Bicyclus anynana repetitive proline-rich cell wall protein 1-like (LOC112046994), mRNA	2
BA_CPR64.14.16	83	33	pool1	9.68721e-07	0.000308505	615	0	0.97	XM_024081653.1	PREDICTED: Bicyclus anynana cuticle protein 18.6-like (LOC112045476), mRNA	2
BA_contig_080403	67	20	pool1	1.26452e-07	6.0406e-05	1293	3e-147	0.97	XM_024084164.1	PREDICTED: Bicyclus anynana cuticle protein 7-like (LOC112047155), transcript variant X2, mRNA	2
BA_CPH17.36.50	62	27	pool1	0.000109852	0.0169278	530	3e-147	0.98	XM_024080946.1	PREDICTED: Bicyclus anynana calphotin-like (LOC112044932), mRNA	2
BA_contig_080195	48	11	pool1	5.77637e-07	0.000212259	856	2e-22	0.79	XM_024079011.1	PREDICTED: Bicyclus anynana cuticle protein 10.9-like (LOC112043543), mRNA	2
BA_CU08.22.22	43	11	pool1	6.90336e-06	0.00149897	777	0	0.99	XM_024098892.1	PREDICTED: Bicyclus anynana histidine-rich glycoprotein-like (LOC112058183), mRNA	2
BA_CPR73.12.19	29	5	pool1	1.70085e-05	0.00312499	704	0	0.99	XM_024091531.1	PREDICTED: Bicyclus anynana larval cuticle protein A2B-like (LOC112052447), mRNA	2
BA_CU18B.2.3	28	3	pool1	1.80502e-06	0.000479033	665	0	0.96	XM_024081673.1	PREDICTED: Bicyclus anynana larval/pupal rigid cuticle protein 66-like (LOC112045492), mRNA	2
BA_LOC100159682.2.2	27	1	pool1	7.12541e-08	3.78201e-05	2159	0	0.99	XM_024085492.1	PREDICTED: Bicyclus anynana vegetative catalase-like (LOC112048111), mRNA	2
BA_AOX2.7.9	17	2	pool1	0.000323571	0.0454617	2941	0	0.9	XM_024094921.1	PREDICTED: Bicyclus anynana indole-3-acetaldehyde oxidase-like (LOC112054963), mRNA	2
BA_contig_110073	283	104	pool1	1.11023e-16	2.65178e-13	1011	0	0.99	XM_024093028.1	PREDICTED: Bicyclus anynana uncharacterized LOC112053568 (LOC112053568), mRNA	3
BA_contig_109986	188	101	pool1	4.57103e-08	2.72948e-05	1710	0	0.94	XM_024093028.1	PREDICTED: Bicyclus anynana uncharacterized LOC112053568 (LOC112053568), mRNA	3
BA_DERE_GG15987.22.47	119	58	pool1	1.15692e-06	0.000345413	537	0	0.97	XR_002887501.1	PREDICTED: Bicyclus anynana uncharacterized LOC112055391 (LOC112055391), ncRNA	3

## Sheet: Lib1_only
#contigName	countPool1	length	max score	total score	query cover	e value	ident	accession	blast.name	type
BA_LOC692904.21.22	6	854	898	1297	0.9	0	0.9881	XR_002887739.1	PREDICTED: Bicyclus anynana general odorant-binding protein 56a-like (LOC112057867), transcript variant X2, misc_RNA	1
BA_contig_055007	6	424	191	191	0.4	2e-44	0.8743	XM_024097900.1	PREDICTED: Bicyclus anynana GDP-Man:Man(3)GlcNAc(2)-PP-Dol alpha-1,2-mannosyltransferase-like (LOC112057418), mRNA	2
BA_contig_068759	6	229	126	126	0.34	3e-25	0.9615	XM_024090277.1	PREDICTED: Bicyclus anynana serine protease gd-like (LOC112051571), mRNA	2
BA_contig_096964	6	509	63.9	63.9	0.06	5e-06	1	XM_024090257.1	PREDICTED: Bicyclus anynana ubiquitin carboxyl-terminal hydrolase 35 (LOC112051311), transcript variant X5, mRNA	2
BA_contig_087345	6	437	381	624	0.89	1e-101	0.9615	XM_024083878.1	PREDICTED: Bicyclus anynana repetitive proline-rich cell wall protein 1-like (LOC112046994), mRNA	2
BA_contig_110743	6	1060	505	505	0.3	2e-138	0.9562	XM_024086629.1	PREDICTED: Bicyclus anynana alpha-tocopherol transfer protein-like (LOC112048922), transcript variant X3, mRNA	2
BA_CPH17.29.50	6	505	462	462	0.63	5e-126	0.9346	XM_024080946.1	PREDICTED: Bicyclus anynana calphotin-like (LOC112044932), mRNA	2
BA_contig_089017	6	545	865	865	0.97	0	0.9576	XM_024085900.1	PREDICTED: Bicyclus anynana islet cell autoantigen 1 (LOC112048386), mRNA	2
BA_LOC656819.2.2	6	1255	2158	2158	0.97	0	0.9861	XM_024078330.1	PREDICTED: Bicyclus anynana 8-oxo-dGDP phosphatase NUDT18 (LOC112043067), mRNA	2
BA_LASP.2.2	7	636	778	936	0.9	0	0.9136	XM_024082348.1	PREDICTED: Bicyclus anynana LIM and SH3 domain protein Lasp (LOC112045946), transcript variant X2, mRNA	2
BA_CPH17.6.50	11	403	510	510	0.69	1e-140	0.9964	XM_024080946.1	PREDICTED: Bicyclus anynana calphotin-like (LOC112044932), mRNA	2
BA_LOC100866830.50.199	6	539	462	462	0.56	5e-126	0.9385	KM378244.1	Hamadryas epinome voucher epinome cracker mitochondrion, complete genome	2
BA_contig_085912	7	286	316	316	0.88	2e-82	0.898	KM378244.1	Hamadryas epinome voucher epinome cracker mitochondrion, complete genome	2
BA_LOC100680399.16.23	7	644	776	776	0.81	0	0.9389	JX185883.1	Mycalesis gotama 16S ribosomal RNA gene, partial sequence; tRNA-Val gene, complete sequence; and 12S ribosomal RNA gene, partial sequence; mitochondrial	2
BA_contig_115652	8	641	704	704	0.92	0	0.8815	KF881051.1	Lethe albolineata mitochondrion, complete genome	2
BA_CG9306.3.4	8	560	896	896	0.89	0	0.99	XM_024097174.1	PREDICTED: Bicyclus anynana NADH dehydrogenase [ubiquinone] 1 beta subcomplex subunit 9 (LOC112056703), mRNA	2
BA_contig_094802	6	1308	1533	1533	1	0	0.8785	XR_002887413.1	PREDICTED: Bicyclus anynana uncharacterized LOC112053814 (LOC112053814), ncRNA	3
BA_RM48.1.2	6	924	1696	1696	0.99	0	0.9989	XM_024095101.1	PREDICTED: Bicyclus anynana uncharacterized LOC112055103 (LOC112055103), mRNA	3
BA_contig_100691	6	743	651	651	0.66	0	0.9046	XR_002887290.1	PREDICTED: Bicyclus anynana uncharacterized LOC112052056 (LOC112052056), ncRNA	3
BA_DERE_GG15987.36.47	6	469	638	638	0.87	6e-179	0.9511	XR_002887501.1	PREDICTED: Bicyclus anynana uncharacterized LOC112055391 (LOC112055391), ncRNA	3
BA_DERE_GG15987.26.47	6	468	355	561	0.68	7e-94	0.9805	XR_002887478.1	PREDICTED: Bicyclus anynana uncharacterized LOC112054975 (LOC112054975), ncRNA	3
BA_contig_074326	6	538	549	549	0.66	4e-152	0.9306	XM_024092221.1	PREDICTED: Bicyclus anynana uncharacterized LOC112052969 (LOC112052969), mRNA	3
BA_DSIM_GD23732.3.4	7	532	723	723	0.78	0	0.9785	XM_024091746.1	PREDICTED: Bicyclus anynana uncharacterized LOC112052598 (LOC112052598), transcript variant X2, mRNA	3
BA_contig_109275	6								No similarity found	4
BA_contig_069275	6								No similarity found	4
BA_contig_000045	7								No similarity found	4

## Sheet: Overexpr_Lib3-Lib45
#pool1LibNames : RL3_GS8R7LM02	RL3_GS8R7LM03	RL3_GZKG99Z02	RL3_GZXD38A01	RL3_GZXD38A02
#pool2LibNames : RL4_GS8R7LM02	RL4_GS8R7LM03	RL4_GZKG99Z02	RL4_GZXD38A01	RL4_GZXD38A02	RL5_GS8R7LM02	RL5_GS8R7LM03	RL5_GZKG99Z02	RL5_GZXD38A01	RL5_GZXD38A02
#total reads pool1 : 15972
#total reads pool2 : 31614
#contigName	countPool1	countPool2	overexp.	p-value	qvalue	length.bp	e.value	blast.identity	blast.sequenceID	blast.name	type
BA_LOC658019.3.5	43	2	pool1	1.76878e-18	7.48722e-15	1077	0	0.99	XM_024097267.1	PREDICTED: Bicyclus anynana aldose reductase-like (LOC112056788), transcript variant X1, mRNA	1
BA_AN-0128.46.75	20	2	pool1	3.4977e-08	2.96115e-05	978	0	0.97	XM_024087326.1	PREDICTED: Bicyclus anynana protein takeout-like (LOC112049450), mRNA	2
BA_LOC778467.5.6	11	1	pool1	5.04972e-05	0.0125738	2432	0	0.97	XM_024086620.1	PREDICTED: Bicyclus anynana fructose-bisphosphate aldolase (LOC112048916), mRNA	2
BA_contig_099045	26	10	pool1	2.83005e-06	0.00149745	1441	0	0.98	XM_024091601.1	PREDICTED: Bicyclus anynana alpha-tocopherol transfer protein-like (LOC112052498), mRNA	2
BA_contig_085745	81	70	pool1	4.01649e-07	0.000242883	822	0	0.9	JX185883.1	Mycalesis gotama 16S ribosomal RNA gene, partial sequence; tRNA-Val gene, complete sequence; and 12S ribosomal RNA gene, partial sequence; mitochondrial	2
BA_LOC100866830.34.199	88	95	pool1	5.57892e-05	0.0131198	590	0	0.94	JX185883.1	Mycalesis gotama 16S ribosomal RNA gene, partial sequence; tRNA-Val gene, complete sequence; and 12S ribosomal RNA gene, partial sequence; mitochondrial	2
BA_COX1.51.59	108	119	pool1	1.50043e-05	0.00488565	1948	0	0.99	KR139584.1	Bicyclus anynana voucher SH-ug12-50 cytochrome oxidase subunit I (COI) gene, partial cds; mitochondrial	2
BA_LOC100866830.161.199	652	942	pool1	5.26351e-10	1.11402e-06	3084	0	0.94	JX185883.1	Mycalesis gotama 16S ribosomal RNA gene, partial sequence; tRNA-Val gene, complete sequence; and 12S ribosomal RNA gene, partial sequence; mitochondrial	2
BA_LOC100866830.196.199	21	7	pool1	8.80025e-06	0.0033865	800	0	0.99	XM_024084152.1	PREDICTED: Bicyclus anynana uncharacterized LOC112047145 (LOC112047145), mRNA	3

## Sheet: Lib3_only
#contigName	countPool1	length	max score	total score	query cover	e value	ident	accession	blast.name	type
BA_ALDR.3.3	5	965	1480	1480	0.97	0	0.9501	XM_024097267.1	PREDICTED: Bicyclus anynana aldose reductase-like (LOC112056788), transcript variant X1, mRNA	1
BA_ACO11.6.7	15	1437	2471	2471	0.93	0	1	KM378663.1	Bicyclus anynana delta 9 desaturase-like protein mRNA, complete cds	1
BA_contig_021211	5	401	483	483	0.72	3e-132	0.9689	XM_024083879.1	PREDICTED: Bicyclus anynana A-kinase anchor protein 14 (LOC112046995), mRNA	2
BA_LOC100866091.102.116	5	264	255	255	0.52	4e+64	1	XM_024091819.1	PREDICTED: Bicyclus anynana heat shock 70 kDa protein cognate 4 (LOC112052645), mRNA	2
BA_LOC100650985.1.1	5	1829	2998	2998	0.95	0	0.9776	XM_024099332.1	PREDICTED: Bicyclus anynana endoplasmic reticulum lectin 1 (LOC112058474), transcript variant X1, mRNA	2
BA_contig_080112	5	3185	409	409	0.06	4e-109	1	XM_024094625.1	PREDICTED: Bicyclus anynana nucleoplasmin-like protein (LOC112054738), transcript variant X2, mRNA	2
BA_GLGB.1.1	5	2279	4048	4048	1	0	0.9873	XM_024081495.1	PREDICTED: Bicyclus anynana 1,4-alpha-glucan-branching enzyme (LOC112045348), transcript variant X1, mRNA	2
BA_SUC1.1.1	6	1748	2782	2782	0.9	0	0.9836	XM_024083210.1	PREDICTED: Bicyclus anynana sucrose-6-phosphate hydrolase-like (LOC112046541), mRNA	2
BA_contig_022097	7	304	303	303	0.57	2e-78	0.9774	XM_024099132.1	PREDICTED: Bicyclus anynana putative epidermal cell surface receptor (LOC112058361), transcript variant X2, mRNA	2
BA_MYRO1.5.9	9	1651	2913	2913	0.98	0	0.9884	XM_024096011.1	PREDICTED: Bicyclus anynana myrosinase 1-like (LOC112055805), mRNA	2
BA_contig_109374	5	286	182	182	0.52	8e-42	0.8854	GQ201354.1	Melanargia russiae voucher DNAwthmel 221 from Iran 16S ribosomal RNA gene, partial sequence	2
BA_ALPHATUB84B.3.3	5	401	268	268	0.36	8e-68	1	XM_024096857.1	PREDICTED: Bicyclus anynana tubulin alpha chain (LOC112056414), transcript variant X2, mRNA	2
BA_contig_086660	6	98	115	115	0.63	2e-22	1	XM_024080880.1	PREDICTED: Bicyclus anynana 60S ribosomal protein L9 (LOC112044884), mRNA	2
BA_AAEL_AAEL005737.1.3	27	2253	2518	2518	0.64	0	98.13	XM_024093219.1	PREDICTED: Bicyclus anynana cytochrome b5-related protein-like (LOC112053712), mRNA	2
BA_contig_081907	5	1118	1930	1930	0.96	0	0.9916	XM_024088000.1	PREDICTED: Bicyclus anynana uncharacterized LOC112049933 (LOC112049933), mRNA	3
BA_contig_094452	6	1258	2189	2189	0.96	0	0.9926	XM_024097289.1	PREDICTED: Bicyclus anynana uncharacterized LOC112056797 (LOC112056797), mRNA	3
BA_contig_115489	6	443	634	634	0.98	8e-178	0.9359	XM_024078256.1	PREDICTED: Bicyclus anynana uncharacterized LOC112043013 (LOC112043013), transcript variant X2, mRNA	3
BA_OBP56G.1.1	21	736	1033	1033	0.77	0	0.9947	XM_024078257.1	PREDICTED: Bicyclus anynana uncharacterized LOC112043013 (LOC112043013), transcript variant X3, mRNA	3
BA_contig_109376	5								No significant similarity found	4
BA_contig_020274	5								No significant similarity found	4
BA_contig_100474	7								No significant similarity found	4
BA_contig_021311	7								No significant similarity found	4

## Sheet: Overexpr_Lib6-Lib7
#pool1LibNames : RL6_GS8R7LM02	RL6_GS8R7LM03	RL6_GZKG99Z02	RL6_GZXD38A01	RL6_GZXD38A02
#pool2LibNames : RL7_GS8R7LM02	RL7_GS8R7LM03	RL7_GW3I2KR01	RL7_GZKG99Z02	RL7_GZXD38A01	RL7_GZXD38A02
#total reads pool1 : 10986
#total reads pool2 : 16013
#contigName	countPool1	countPool2	overexp.	p-value	qvalue	length.bp	e.value	blast.identity	blast.sequenceID	blast.name	type
BA_contig_114904	10	1	pool1	0.000860587	0.0109319	137	4e-51	0.98	XM_024081292.1	PREDICTED: Bicyclus anynana arrestin homolog (LOC112045197), mRNA	1
BA_ARR2.12.24	10	2	pool1	0.00515512	0.0408911	377	2e-168	0.96	XM_024081292.1	PREDICTED: Bicyclus anynana arrestin homolog (LOC112045197), mRNA	1
BA_CSP5.9.20	15	4	pool1	0.0014759	0.0136892	759	0	0.98	XM_024086738.1	PREDICTED: Bicyclus anynana ejaculatory bulb-specific protein 3-like (LOC112049012), mRNA	1
BA_ARRB.8.10	17	4	pool1	0.000215222	0.00397142	467	6e-174	0.95	XM_024081292.1	PREDICTED: Bicyclus anynana arrestin homolog (LOC112045197), mRNA	1
BA_ARRH.31.58	18	2	pool1	6.66918e-06	0.000238593	508	2e-99	0.99	XM_024081292.1	PREDICTED: Bicyclus anynana arrestin homolog (LOC112045197), mRNA	1
BA_CSP5.20.20	20	4	pool1	2.66671e-05	0.000677498	612	0	0.97	XM_024086738.1	PREDICTED: Bicyclus anynana ejaculatory bulb-specific protein 3-like (LOC112049012), mRNA	1
BA_contig_114951	21	3	pool1	2.8974e-06	0.00011287	155	1e-52	0.96	XM_024081292.1	PREDICTED: Bicyclus anynana arrestin homolog (LOC112045197), mRNA	1
BA_GST2.4.4	25	1	pool1	2.6918e-09	3.93228e-07	1436	0	0.95	XM_024094505.1	PREDICTED: Bicyclus anynana glutathione S-transferase 2-like (LOC112054656), mRNA	1
BA_AACT.7.7	31	13	pool1	8.22718e-05	0.00169674	1971	0	0.99	XM_024081616.1	PREDICTED: Bicyclus anynana acetyl-CoA acetyltransferase B, mitochondrial-like (LOC112045444), mRNA	1
BA_ARRH.35.58	54	24	pool1	3.86775e-07	1.83248e-05	958	0	0.95	XM_024081292.1	PREDICTED: Bicyclus anynana arrestin homolog (LOC112045197), mRNA	1
BA_contig_105177	10	1	pool1	0.000860587	0.0109319	1474	2e-25	0.8	XM_024080775.1	Bicyclus anynana putative ATP-dependent RNA helicase me31b (oC112044808), mRNA	2
BA_TRET1.12.12	10	1	pool1	0.000860587	0.0109319	3196	0	0.78	XM_013315960.1	PREDICTED: Papilio xuthus facilitated trehalose transporter Tret1-2 homolog (LOC106120607), mRNA	2
BA_AAEL_AAEL008006.1.1	10	2	pool1	0.00515512	0.0408911	2021	0	0.98	XM_024079249.1	PREDICTED: Bicyclus anynana lambda-crystallin homolog (LOC112043720), mRNA	2
BA_contig_111291	10	1	pool1	0.000860587	0.0109319	1060	0	0.99	XM_024086268.1	PREDICTED: Bicyclus anynana optomotor-blind protein (LOC112048640), transcript variant X7, mRNA	2
BA_PPT1.1.1	10	1	pool1	0.000860587	0.0109319	1102	0	0.99	XM_024090564.1	PREDICTED: Bicyclus anynana palmitoyl-protein thioesterase 1 (LOC112051764), transcript variant X3, mRNA	2
BA_ALLS.1.1	10	2	pool1	0.00515512	0.0408911	529	0	0.99	XM_024080339.1	PREDICTED: Bicyclus anynana allatostatin (LOC112044472), mRNA	2
BA_contig_111269	10	1	pool1	0.000860587	0.0109319	726	0	0.94	XM_024078371.1	PREDICTED: Bicyclus anynana organic cation transporter protein (LOC112043098), transcript variant X1, mRNA	2
BA_DANA_GF10188.1.1	10	1	pool1	0.000860587	0.0109319	1330	0	0.99	XM_024080784.1	PREDICTED: Bicyclus anynana dnaJ homolog subfamily C member 2 (LOC112044814), mRNA	2
BA_LOC693107.2.3	10	1	pool1	0.000860587	0.0109319	697	0	0.99	XM_024093905.1	PREDICTED: Bicyclus anynana N-alpha-acetyltransferase 20 (LOC112054208), transcript variant X2, mRNA	2
BA_LOC100101188.3.3	10	1	pool1	0.000860587	0.0109319	1029	0	0.96	XM_024090231.1	PREDICTED: Bicyclus anynana transmembrane protein 14C (LOC112051542), mRNA	2
BA_CPIPJ_CPIJ000418.1.1	10	1	pool1	0.000860587	0.0109319	902	0	0.98	XM_024081076.1	PREDICTED: Bicyclus anynana dnaJ homolog subfamily C member 28 (LOC112045031), mRNA	2
BA_PHS2.1.1	10	1	pool1	0.000860587	0.0109319	744	0	0.93	XM_024078996.1	PREDICTED: Bicyclus anynana pterin-4-alpha-carbinolamine dehydratase (LOC112043533), transcript variant X1, mRNA	2
BA_contig_111394	10	2	pool1	0.00515512	0.0408911	1069	0	0.98	XM_024082186.1	PREDICTED: Bicyclus anynana muscle M-line assembly protein unc-89-like (LOC112045836), transcript variant X2, mRNA	2
BA_contig_088773	10	1	pool1	0.000860587	0.0109319	1355	8e-48	0.89	XM_014499828.1	PREDICTED: Papilio machaon protein bric-a-brac 2-like (LOC106708344), transcript variant X3, mRNA	2
BA_contig_109828	10	2	pool1	0.00515512	0.0408911	1502	0	0.92	XM_024099212.1	PREDICTED: Bicyclus anynana protein 4.1 homolog (LOC112058407), transcript variant X5, mRNA	2
BA_LOC100875115.1.1	10	1	pool1	0.000860587	0.0109319	858	0	0.99	XM_024090451.1	PREDICTED: Bicyclus anynana tyrosine-protein phosphatase Lar (LOC112051676), transcript variant X3, mRNA	2
BA_contig_093864	10	2	pool1	0.00515512	0.0408911	756	0	0.99	XM_024083869.1	PREDICTED: Bicyclus anynana fragile X mental retardation syndrome-related protein 1 (LOC112046986), transcript variant X2, mRNA	2
BA_LOC657263.1.2	10	1	pool1	0.000860587	0.0109319	1096	0	0.99	XM_024098147.1	PREDICTED: Bicyclus anynana sodium/potassium/calcium exchanger 3 (LOC112057662), transcript variant X2, mRNA	2
BA_AAEL_AAEL006006.1.1	11	3	pool1	0.00523323	0.0374443	2256	0	0.99	XM_024081504.1	PREDICTED: Bicyclus anynana EF-hand domain-containing protein D2 homolog (LOC112045355), mRNA	2
BA_contig_094998	12	2	pool1	0.000730431	0.00984959	1610	0	0.99	XM_024085340.1	PREDICTED: Bicyclus anynana chaoptin (LOC112048007), transcript variant X5, mRNA	2
BA_contig_086720	12	2	pool1	0.000730431	0.00984959	1228	0	0.99	XM_024092170.1	PREDICTED: Bicyclus anynana bax inhibitor 1 (LOC112052921), mRNA	2
BA_RTXE.8.9	12	2	pool1	0.000730431	0.00984959	2028	7e-45	0.8	XM_024079716.1	PREDICTED: Bicyclus anynana beta-1,4-galactosyltransferase 7 (LOC112044001), mRNA	2
BA_LOC100866753.1.1	13	3	pool1	0.00136741	0.0128186	1144	0	0.99	XM_024080572.1	PREDICTED: Bicyclus anynana protein retinal degeneration B (LOC112044659), mRNA	2
BA_KPYK.2.2	15	3	pool1	0.000350232	0.00601919	1470	0	0.99	XM_024078890.1	PREDICTED: Bicyclus anynana pyruvate kinase-like (LOC112043476), transcript variant X1, mRNA	2
BA_ELOC.1.2	15	1	pool1	1.36651e-05	0.00046067	745	0	0.97	XM_024090232.1	PREDICTED: Bicyclus anynana elongin-C (LOC112051543), mRNA	2
BA_CD63.1.1	15	6	pool1	0.00626707	0.0435959	1490	0	0.97	XM_024086037.1	PREDICTED: Bicyclus anynana CD63 antigen-like (LOC112048504), transcript variant X1, mRNA	2
BA_DNAJ-10.1.1	15	1	pool1	1.36651e-05	0.00046067	1098	0	0.99	XM_024078057.1	PREDICTED: Bicyclus anynana dnaJ homolog subfamily C member 9 (LOC112042872), mRNA	2
BA_SUCB2.1.1	15	1	pool1	1.36651e-05	0.00046067	1716	0	0.98	XM_024090572.1	PREDICTED: Bicyclus anynana succinate--CoA ligase [GDP-forming] subunit beta, mitochondrial-like (LOC112051781), mRNA	2
BA_contig_094434	15	6	pool1	0.00626707	0.0435959	1386	0	0.99	XM_024088912.1	PREDICTED: Bicyclus anynana synaptotagmin 1 (LOC112050614), transcript variant X5, mRNA	2
BA_contig_110620	15	4	pool1	0.0014759	0.0136892	1303	0	0.99	XM_024093547.1	PREDICTED: Bicyclus anynana glycogen synthase kinase-3 beta (LOC112053924), transcript variant X9, mRNA	2
BA_LOC732895.1.1	15	3	pool1	0.000350232	0.00601919	1329	0	0.99	XM_024083704.1	PREDICTED: Bicyclus anynana heme oxygenase 1 (LOC112046875), transcript variant X1, mRNA	2
BA_NDUA6.1.3	15	6	pool1	0.00626707	0.0435959	609	0	0.99	XM_024091158.1	PREDICTED: Bicyclus anynana NADH dehydrogenase [ubiquinone] 1 alpha subcomplex subunit 6-like (LOC112052181), mRNA	2
BA_CPIPJ_CPIJ008947.3.3	15	2	pool1	7.19852e-05	0.00163883	1926	0	0.99	XM_024088874.1	PREDICTED: Bicyclus anynana facilitated trehalose transporter Tret1-like (LOC112050581), mRNA	2
BA_contig_116988	15	2	pool1	7.19852e-05	0.00163883	905	0	0.99	KT781083.1	Bicyclus anynana klarsicht-like protein mRNA, complete cds	2
BA_CPT2.2.3	15	2	pool1	7.19852e-05	0.00163883	1551	0	0.98	XM_024080549.1	PREDICTED: Bicyclus anynana carnitine O-palmitoyltransferase 2, mitochondrial (LOC112044646), mRNA	2
BA_contig_109531	16	3	pool1	0.000177148	0.00337544	1051	2e-07	0.95	XM_024080662.1	PREDICTED: Bicyclus anynana esterase FE4-like (LOC112044719), transcript variant X5, mRNA	2
BA_LOC778466.14.16	16	3	pool1	0.000177148	0.00337544	1515	0	0.99	XR_002887542.1	PREDICTED: Bicyclus anynana prostaglandin reductase 1 pseudogene (LOC112055912), misc_RNA	2
BA_contig_092615	17	2	pool1	1.48224e-05	0.000399749	1647	1e-62	0.9	XM_024086901.1	PREDICTED: Bicyclus anynana LETM1 domain-containing protein 1 (LOC112049120), mRNA	2
BA_DSIM_GD19172.1.1	18	7	pool1	0.00185596	0.0166846	1467	0	0.99	XM_024092757.1	PREDICTED: Bicyclus anynana translation initiation factor IF-2-like (LOC112053357), mRNA	2
BA_ANRA2.1.1	20	5	pool1	0.00010947	0.00220576	1024	0	0.99	XM_024081487.1	PREDICTED: Bicyclus anynana DNA-binding protein RFXANK-like (LOC112045340), mRNA	2
BA_contig_105848	20	2	pool1	1.33089e-06	5.98219e-05	949	0	0.99	XM_024080528.1	PREDICTED: Bicyclus anynana neurexin-1 (LOC112044628), transcript variant X3, mRNA	2
BA_YPF05.2.2	20	7	pool1	0.000588622	0.00818932	1103	0	0.95	XM_024080841.1	PREDICTED: Bicyclus anynana resistance to inhibitors of cholinesterase protein 3 (LOC112044854), transcript variant X5, mRNA	2
BA_contig_081301	20	10	pool1	0.00478767	0.0388555	2635	0.017	1	XM_024087094.1	PREDICTED: Bicyclus anynana zinc/cadmium resistance protein (LOC112049270), transcript variant X3, mRNA	2
BA_LOC733130.1.1	20	1	pool1	1.97234e-07	1.08047e-05	647	0	0.97	XM_024086842.1	PREDICTED: Bicyclus anynana phosphoenolpyruvate carboxykinase [GTP]-like (LOC112049082), transcript variant X1, mRNA	2
BA_NOTCH.8.9	20	1	pool1	1.97234e-07	1.08047e-05	1699	0	0.97	XM_024090952.1	PREDICTED: Bicyclus anynana neurogenic locus Notch protein (LOC112052049), transcript variant X2, mRNA	2
BA_contig_095130	21	1	pool1	8.38686e-08	6.39224e-06	626	2e-15	0.91	XM_024078922.1	PREDICTED: Bicyclus anynana calcium release-activated calcium channel protein 1 (LOC112043473), transcript variant X5, mRNA	2
BA_CYTB.16.21	21	4	pool1	1.3224e-05	0.000454544	731	0	0.96	XR_002887658.1	PREDICTED: Bicyclus anynana NADH-ubiquinone oxidoreductase chain 1-like (LOC112057140), misc_RNA	2
BA_DSEC_GM17204.1.1	27	12	pool1	0.00044557	0.00656373	1241	0	99	XM_024098139.1	PREDICTED: Bicyclus anynana myosin heavy chain, muscle (LOC112057654), transcript variant X36, mRNA	2
BA_LOC100876288.1.1	29	1	pool1	8.43805e-11	2.11313e-08	863	0	0.98	XM_024086630.1	PREDICTED: Bicyclus anynana alpha-tocopherol transfer protein-like (LOC112048923), mRNA	2
BA_LOC692939.6.6	43	18	pool1	2.88158e-06	0.000114805	2245	0	0.99	XM_024079111.1	PREDICTED: Bicyclus anynana glutamate dehydrogenase, mitochondrial (LOC112043616), mRNA	2
BA_RN146.1.1	49	1	pool1	2.07134e-18	1.81553e-15	875	0	0.99	XM_024090389.1	PREDICTED: Bicyclus anynana E3 ubiquitin-protein ligase RNF146 (LOC112051661), transcript variant X1, mRNA	2
BA_IDGFL.4.5	62	5	pool1	4.20059e-19	7.36363e-16	1829	0	0.98	XM_024087779.1	PREDICTED: Bicyclus anynana chitinase-like protein EN03 (LOC112049752), transcript variant X4, mRNA	2
BA_contig_095183	10	2	pool1	0.00515512	0.0408911	773	1e-44	0.8	XM_024088407.1	PREDICTED: Bicyclus anynana guanine nucleotide exchange factor DBS-like (LOC112050201), transcript variant X8, mRNA	2
BA_CHD1.8.10	10	1	pool1	0.000860587	0.0109319	1002	0	0.98	XM_024096307.1	PREDICTED: Bicyclus anynana chromodomain-helicase-DNA-binding protein 1 (LOC112055990), mRNA	2
BA_DVIR_GJ12845.1.1	10	1	pool1	0.000860587	0.0109319	1050	0	0.99	XM_024087514.1	PREDICTED: Bicyclus anynana transcription initiation factor IIE subunit beta (LOC112049570), mRNA	2
BA_TENA.5.7	10	2	pool1	0.00515512	0.0408911	1787	0	0.97	XM_024090946.1	PREDICTED: Bicyclus anynana prion-like-(Q/N-rich) domain-bearing protein 25 (LOC112052046), transcript variant X1, mRNA	2
BA_contig_110604	10	1	pool1	0.000860587	0.0109319	401	0	0.98	XM_024088533.1	PREDICTED: Bicyclus anynana high mobility group nucleosome-binding domain-containing protein 5-like (LOC112050297), transcript variant X4, mRNA	2
BA_contig_109718	10	1	pool1	0.000860587	0.0109319	1774	0	0.98	XM_024088819.1	PREDICTED: Bicyclus anynana peptidyl-prolyl cis-trans isomerase G (LOC112050528), mRNA	2
BA_CHRD1.1.1	10	1	pool1	0.000860587	0.0109319	1303	0	0.99	XM_024081342.1	PREDICTED: Bicyclus anynana cysteine and histidine-rich domain-containing protein (LOC112045233), mRNA	2
BA_TADA1.1.1	10	2	pool1	0.00515512	0.0408911	1278	0	0.99	XM_024095861.1	PREDICTED: Bicyclus anynana transcriptional adapter 1-like (LOC112055669), mRNA	2
BA_contig_105168	10	1	pool1	0.000860587	0.0109319	1142	5e-39	0.89	XM_021331498.1	PREDICTED: Helicoverpa armigera RNA pseudouridylate synthase domain-containing protein 2-like (LOC110373989), transcript variant X5, mRNA	2
BA_LOC100743667.1.1	10	1	pool1	0.000860587	0.0109319	1830	0	0.99	XM_024080415.1	PREDICTED: Bicyclus anynana transcription initiation factor TFIID subunit 3-like (LOC112044533), transcript variant X2, mRNA	2
BA_ISWI.4.5	10	2	pool1	0.00515512	0.0408911	2799	0	0.99	XM_024096275.1	PREDICTED: Bicyclus anynana chromatin-remodeling complex ATPase chain Iswi (LOC112055968), transcript variant X1, mRNA	2
BA_contig_109357	10	1	pool1	0.000860587	0.0109319	931	0	0.99	XM_024081166.1	PREDICTED: Bicyclus anynana protein transport protein Sec61 subunit alpha (LOC112045096), mRNA	2
BA_UBP16.1.1	10	2	pool1	0.00515512	0.0408911	2010	0	0.99	XM_024087012.1	PREDICTED: Bicyclus anynana ubiquitin carboxyl-terminal hydrolase 45 (LOC112049215), transcript variant X1, mRNA	2
BA_COX1.58.59	10	2	pool1	0.00515512	0.0408911	228	1e-78	0.96	KR139583.1	Bicyclus anynana voucher SH-ug12-49 cytochrome oxidase subunit I (COI) gene, partial cds; mitochondrial	2
BA_contig_086025	10	1	pool1	0.000860587	0.0109319	273	2e-72	0.89	KM200152.1	Mycalesis anaxias 16S ribosomal RNA gene, partial sequence; mitochondrial	2
BA_RM16.1.1	10	1	pool1	0.000860587	0.0109319	974	0	0.97	XM_024094616.1	PREDICTED: Bicyclus anynana 39S ribosomal protein L16, mitochondrial (LOC112054732), mRNA	2
BA_contig_110242	11	2	pool1	0.00267425	0.0228681	856	0	0.96	XM_024092980.1	PREDICTED: Bicyclus anynana putative serine protease K12H4.7 (LOC112053533), transcript variant X1, mRNA	2
BA_CCDC25.2.2	11	1	pool1	0.00037995	0.00611057	1530	0	0.99	XM_024098943.1	PREDICTED: Bicyclus anynana coiled-coil domain-containing protein 25 (LOC112058237), mRNA	2
BA_BRAFLDRAFT_57766.3.3	11	3	pool1	0.00523323	0.0374443	1103	0	0.98	XM_024083318.1	PREDICTED: Bicyclus anynana zinc finger protein 675-like (LOC112046615), mRNA	2
BA_PHUM_PHUM161510.1.1	11	1	pool1	0.00037995	0.00611057	1251	0	0.99	XM_024079973.1	PREDICTED: Bicyclus anynana solute carrier family 12 member 4 (LOC112044215), transcript variant X7, mRNA	2
BA_LOC100879117.1.1	11	1	pool1	0.00037995	0.00611057	987	0	0.99	XM_024080076.1	PREDICTED: Bicyclus anynana centromere/kinetochore protein zw10 homolog (LOC112044279), mRNA	2
BA_LOC100866830.51.199	11	1	pool1	0.00037995	0.00611057	377	7e-88	0.98	HM241480.1	Bicyclus anynana voucher MCZ:AM-97-V725 cytochrome oxidase subunit I (COI) gene, partial cds; tRNA-Leu gene, complete sequence; and cytochrome oxidase subunit II (COII) gene, partial cds; mitochondrial	2
BA_COX1.13.59	11	1	pool1	0.00037995	0.00611057	520	0	0.99	KX930409.1	Bicyclus anynana anynana voucher DL L1029 cytochrome c oxidase subunit I (COI) gene, partial cds; mitochondrial	2
BA_COX-A.1.1	11	1	pool1	0.00037995	0.00611057	510	1e-156	0.94	XM_024088492.1	PREDICTED: Bicyclus anynana cytochrome c oxidase subunit 6C-like (LOC112050263), mRNA	2
BA_contig_093909	12	3	pool1	0.00268554	0.0227428	1488	0	0.97	XM_024083869.1	PREDICTED: Bicyclus anynana fragile X mental retardation syndrome-related protein 1 (LOC112046986), transcript variant X2, mRNA	2
BA_BRM.1.3	12	3	pool1	0.00268554	0.0227428	2360	0	0.99	XM_024096887.1	PREDICTED: Bicyclus anynana ATP-dependent helicase brm (LOC112056453), mRNA	2
BA_contig_094364	12	1	pool1	0.000166697	0.00321121	1128	2e-22	0.88	XM_024078446.1	PREDICTED: Bicyclus anynana protein disulfide-isomerase TMX3 (LOC112043152), mRNA	2
BA_LOC100174824.5.5	15	3	pool1	0.000350232	0.00601919	2050	0	0.98	XM_024085475.1	PREDICTED: Bicyclus anynana leucine zipper putative tumor suppressor 2 homolog (LOC112048097), transcript variant X1, mRNA	2
BA_ATP6.15.15	15	1	pool1	1.36651e-05	0.00046067	667	0	0.98	XR_002887657.1	PREDICTED: Bicyclus anynana ATP synthase subunit a-like (LOC112057139), misc_RNA	2
BA_ATFC.3.4	15	6	pool1	0.00626707	0.0435959	886	0	0.99	XM_024090391.1	PREDICTED: Bicyclus anynana activating transcription factor of chaperone (LOC112051663), transcript variant X1, mRNA	2
BA_LOC100876954.1.1	15	2	pool1	7.19852e-05	0.00163883	1142	0	0.97	XM_024094136.1	PREDICTED: Bicyclus anynana protein SHQ1 homolog (LOC112054366), mRNA	2
BA_LOC692842.1.1	15	2	pool1	7.19852e-05	0.00163883	1960	0	0.98	XR_002887644.1	PREDICTED: Bicyclus anynana serine/arginine-rich splicing factor 2 (LOC112057022), transcript variant X2, misc_RNA	2
BA_LOC100576435.1.1	15	1	pool1	1.36651e-05	0.00046067	727	0	0.98	XM_024090806.1	PREDICTED: Bicyclus anynana shootin-1-like (LOC112051954), mRNA	2
BA_LIN7C.1.1	15	1	pool1	1.36651e-05	0.00046067	947	0	0.97	XM_024086027.1	PREDICTED: Bicyclus anynana protein lin-7 homolog C (LOC112048497), mRNA	2
BA_AAEL_AAEL014799.2.2	15	5	pool1	0.00239787	0.0208093	1074	0	0.99	XM_024083710.1	PREDICTED: Bicyclus anynana FUN14 domain-containing protein 1 (LOC112046881), transcript variant X2, mRNA	2
BA_contig_094860	15	1	pool1	1.36651e-05	0.00046067	1455	2e-28	0.78	XM_024086931.1	PREDICTED: Bicyclus anynana DENN domain-containing protein 1A-like (LOC112049138), transcript variant X4, mRNA	2
BA_contig_113562	15	1	pool1	1.36651e-05	0.00046067	594	2e-61	0.99	XM_024092320.1	PREDICTED: Bicyclus anynana suppressor protein SRP40-like (LOC112052839), transcript variant X4, mRNA	2
BA_LOC659237.1.1	15	2	pool1	7.19852e-05	0.00163883	926	0	0.99	XM_024082233.1	PREDICTED: Bicyclus anynana peroxisomal membrane protein PEX16 (LOC112045867), mRNA	2
BA_LOC100865248.185.285	15	3	pool1	0.000350232	0.00601919	495	6e-120	0.94	KY440295.1	Eterusia risa risa voucher NSYSU-MP-Z629 28S ribosomal RNA gene, partial sequence	2
BA_LOC100134921.6.8	15	3	pool1	0.000350232	0.00601919	711	0	0.97	XM_024092893.1	PREDICTED: Bicyclus anynana cytochrome b-c1 complex subunit Rieske, mitochondrial-like (LOC112053478), mRNA	2
BA_DSEC_GM18067.1.1	15	5	pool1	0.00239787	0.0208093	1593	0	0.98	XM_024093524.1	PREDICTED: Bicyclus anynana 28S ribosomal protein S2, mitochondrial (LOC112053914), mRNA	2
BA_LOC100866830.171.199	15	6	pool1	0.00626707	0.0435959	583	0	0.95	JX185883.1	Mycalesis gotama 16S ribosomal RNA gene, partial sequence; tRNA-Val gene, complete sequence; and 12S ribosomal RNA gene, partial sequence; mitochondrial	2
BA_DVIR_GJ20269.1.1	16	3	pool1	0.000177148	0.00337544	353	1e-64	0.99	XM_024080307.1	PREDICTED: Bicyclus anynana LDLR chaperone boca (LOC112044452), mRNA	2
BA_LOC732985.2.2	17	1	pool1	2.52967e-06	0.000103128	1444	0	0.99	XM_024092143.1	PREDICTED: Bicyclus anynana U2 small nuclear ribonucleoprotein A' (LOC112052900), mRNA	2
BA_LOC656637.13.13	20	1	pool1	1.97234e-07	1.08047e-05	846	0	0.99	XM_024078489.1	PREDICTED: Bicyclus anynana nesprin-1-like (LOC112043184), mRNA	2
BA_LOC659010.5.7	21	9	pool1	0.00134832	0.0128457	3495	0	0.99	XM_024099471.1	PREDICTED: Bicyclus anynana chromodomain-helicase-DNA-binding protein 8-like (LOC112058565), mRNA	2
BA_contig_116135	21	1	pool1	8.38686e-08	6.39224e-06	1792	0	0.91	XM_024082333.1	PREDICTED: Bicyclus anynana transcription factor CP2-like protein 1 (LOC112045935), mRNA	2
BA_RPL35A.9.15	21	9	pool1	0.00134832	0.0128457	577	0	0.99	XM_024086652.1	PREDICTED: Bicyclus anynana 60S ribosomal protein L35a (LOC112048941), mRNA	2
BA_K1704.1.2	22	8	pool1	0.00053413	0.00761244	999	0	0.94	XM_024084409.1	PREDICTED: Bicyclus anynana peptidyl-prolyl cis-trans isomerase G (LOC112047322), mRNA	2
BA_LOC659421.1.1	25	1	pool1	2.6918e-09	3.93228e-07	572	0	0.99	XM_024087865.1	PREDICTED: Bicyclus anynana dual specificity protein kinase CLK2 (LOC112049794), transcript variant X5, mRNA	2
BA_contig_086606	25	1	pool1	2.6918e-09	3.93228e-07	1128	0	0.99	XM_024090362.1	PREDICTED: Bicyclus anynana general transcriptional corepressor trfA-like (LOC112051640), mRNA	2
BA_LRRX1.4.4	25	1	pool1	2.6918e-09	3.93228e-07	3229	0	0.99	XM_024094126.1	PREDICTED: Bicyclus anynana kinesin-related protein 4-like (LOC112054356), transcript variant X2, mRNA	2
BA_LOC100101187.4.4	26	15	pool1	0.0038406	0.0316083	1039	0	0.98	XM_024080284.1	PREDICTED: Bicyclus anynana coiled-coil-helix-coiled-coil-helix domain-containing protein 10, mitochondrial (LOC112044438), mRNA	2
BA_contig_099926	27	3	pool1	2.56673e-08	2.24974e-06	2553	0	0.99	XM_024099471.1	PREDICTED: Bicyclus anynana chromodomain-helicase-DNA-binding protein 8-like (LOC112058565), mRNA	2
BA_contig_110085	31	15	pool1	0.000410063	0.00609186	1226	0	0.97	XM_024087053.1	PREDICTED: Bicyclus anynana neurofilament medium polypeptide (LOC112049245), mRNA	2
BA_contig_115998	31	2	pool1	1.48511e-10	3.25424e-08	772	0	0.98	XM_024084190.1	PREDICTED: Bicyclus anynana protein AATF (LOC112047177), mRNA	2
BA_contig_086500	32	12	pool1	2.01206e-05	0.000518696	1064	0	0.99	XM_024092757.1	PREDICTED: Bicyclus anynana translation initiation factor IF-2-like (LOC112053357), mRNA	2
BA_contig_100301	35	2	pool1	5.07663e-12	1.77987e-09	1270	0	0.95	XM_024095038.1	PREDICTED: Bicyclus anynana myosin heavy chain 95F (LOC112055051), mRNA	2
BA_contig_114984	37	9	pool1	5.98902e-08	4.77216e-06	2442	0	0.98	XM_024098842.1	PREDICTED: Bicyclus anynana transcription elongation factor 1 homolog (LOC112058153), mRNA	2
BA_contig_080482	40	13	pool1	3.47842e-07	1.74219e-05	1170	0	0.99	XM_024097129.1	PREDICTED: Bicyclus anynana nascent polypeptide-associated complex subunit alpha, muscle-specific form-like (LOC112056668), transcript variant X6, mRNA	2
BA_contig_099113	47	27	pool1	0.000115686	0.00230452	1748	0	0.98	XM_024086660.1	PREDICTED: Bicyclus anynana ATP synthase subunit beta, mitochondrial (LOC112048949), mRNA	2
BA_contig_106619	10	1	pool1	0.000860587	0.0109319	554	1e-42	0.95	KX778609.1	Bicyclus anynana clone scaffold467+ genomic sequence	3
BA_contig_109696	10	1	pool1	0.000860587	0.0109319	579	0	0.89	XM_024088956.1	PREDICTED: Bicyclus anynana uncharacterized LOC112050649 (LOC112050649), mRNA	3
BA_contig_104683	10	1	pool1	0.000860587	0.0109319	843	0	99	XR_002887574.1	PREDICTED: Bicyclus anynana uncharacterized LOC112056167 (LOC112056167), ncRNA	3
BA_contig_081379	10	2	pool1	0.00515512	0.0408911	1203	0	0.99	XM_024093490.1	PREDICTED: Bicyclus anynana uncharacterized LOC112053893 (LOC112053893), mRNA	3
BA_contig_099862	10	2	pool1	0.00515512	0.0408911	493	0	0.99	XM_024089666.1	PREDICTED: Bicyclus anynana uncharacterized LOC112051156 (LOC112051156), mRNA	3
BA_contig_087994	10	1	pool1	0.000860587	0.0109319	993	0	0.99	XM_024086950.1	PREDICTED: Bicyclus anynana uncharacterized LOC112049150 (LOC112049150), mRNA	3
BA_SER.4.5	10	2	pool1	0.00515512	0.0408911	532	0	0.99	XM_024081040.1	PREDICTED: Bicyclus anynana uncharacterized LOC112045007 (LOC112045007), mRNA	3
BA_contig_087436	10	2	pool1	0.00515512	0.0408911	1388	0	0.99	XM_024092644.1	PREDICTED: Bicyclus anynana uncharacterized LOC112053270 (LOC112053270), mRNA	3
BA_CG3655.1.1	10	2	pool1	0.00515512	0.0408911	2101	0	0.98	XM_024082272.1	PREDICTED: Bicyclus anynana uncharacterized LOC112045889 (LOC112045889), transcript variant X2, mRNA	3
BA_contig_100670	10	1	pool1	0.000860587	0.0109319	936	2e-97	0.84	KX778610.1	Bicyclus anynana clone scaffold223+ genomic sequence	3
BA_contig_087227	10	1	pool1	0.000860587	0.0109319	408	1e-111	0.94	XR_002887074.1	PREDICTED: Bicyclus anynana uncharacterized LOC112049251 (LOC112049251), transcript variant X2, misc_RNA	3
BA_contig_087384	10	1	pool1	0.000860587	0.0109319	297	3e-140	0.99	XM_024089917.1	PREDICTED: Bicyclus anynana uncharacterized LOC112051318 (LOC112051318), mRNA	3
BA_contig_115245	10	1	pool1	0.000860587	0.0109319	1707	0	0.97	XM_024088044.1	PREDICTED: Bicyclus anynana uncharacterized LOC112049971 (LOC112049971), partial mRNA	3
BA_contig_093952	10	2	pool1	0.00515512	0.0408911	916	0	0.96	XR_002886782.1	PREDICTED: Bicyclus anynana uncharacterized LOC112045055 (LOC112045055), ncRNA	3
BA_contig_088389	10	1	pool1	0.000860587	0.0109319	1198	0	0.99	XM_024097478.1	PREDICTED: Bicyclus anynana uncharacterized LOC112056989 (LOC112056989), mRNA	3
BA_contig_081715	10	2	pool1	0.00515512	0.0408911	689	0	0.99	XM_024087455.1	PREDICTED: Bicyclus anynana uncharacterized LOC112049523 (LOC112049523), transcript variant X3, mRNA	3
BA_contig_111028	10	2	pool1	0.00515512	0.0408911	1279	3e-92	0.87	AC239122.1	Bicyclus anynana clone BA_Ba69H15, complete sequence	3
BA_contig_109225	10	2	pool1	0.00515512	0.0408911	481	2e-104	0.84	XM_024092939.1	PREDICTED: Bicyclus anynana uncharacterized protein C1orf131 (LOC112053504), mRNA	3
BA_contig_081855	10	1	pool1	0.000860587	0.0109319	1124	0	0.99	XM_024081415.1	PREDICTED: Bicyclus anynana uncharacterized LOC112045293 (LOC112045293), mRNA	3
BA_contig_099946	10	2	pool1	0.00515512	0.0408911	1961	0	0.99	XM_024081751.1	PREDICTED: Bicyclus anynana uncharacterized LOC112045535 (LOC112045535), transcript variant X2, mRNA	3
BA_contig_094891	10	1	pool1	0.000860587	0.0109319	823	1e-58	0.79	KX778610.1	Bicyclus anynana clone scaffold223+ genomic sequence	3
BA_POL5.4.4	11	1	pool1	0.00037995	0.00611057	2652	0	0.99	AC239121.1	Bicyclus anynana clone BA_Ba68O14, complete sequence	3
BA_YK213.1.2	11	2	pool1	0.00267425	0.0228681	2810	0	0.99	XM_024087759.1	PREDICTED: Bicyclus anynana uncharacterized LOC112049744 (LOC112049744), transcript variant X1, mRNA	3
BA_contig_101039	15	1	pool1	1.36651e-05	0.00046067	618	3e-113	0.95	XR_002887365.1	PREDICTED: Bicyclus anynana uncharacterized LOC112053213 (LOC112053213), ncRNA	3
BA_contig_086964	15	3	pool1	0.000350232	0.00601919	1159	0	0.92	XR_002887229.1	PREDICTED: Bicyclus anynana uncharacterized LOC112051363 (LOC112051363), ncRNA	3
BA_contig_092743	15	2	pool1	7.19852e-05	0.00163883	1376	2e-129	0.95	KX778609.1	Bicyclus anynana clone scaffold467+ genomic sequence	3
BA_contig_105727	15	1	pool1	1.36651e-05	0.00046067	1042	2e-77	0.88	AC239116.1	Bicyclus anynana clone BA_Ba23M04, complete sequence	3
BA_CPIPJ_CPIJ000421.1.1	19	6	pool1	0.000401194	0.00601105	2440	0	0.99	XM_024081192.1	PREDICTED: Bicyclus anynana uncharacterized LOC112045111 (LOC112045111), mRNA	3
BA_contig_087897	20	2	pool1	1.33089e-06	5.98219e-05	1455	2e-119	0.96	KX778609.1	Bicyclus anynana clone scaffold467+ genomic sequence	3
BA_contig_111629	21	1	pool1	8.38686e-08	6.39224e-06	932	0	0.98	XM_024095231.1	PREDICTED: Bicyclus anynana uncharacterized LOC112055211 (LOC112055211), mRNA	3
BA_contig_094502	22	9	pool1	0.000782254	0.0103105	1430	1e-31	0.86	KX778610.1	Bicyclus anynana clone scaffold223+ genomic sequence	3
BA_LOC100866830.134.199	23	2	pool1	1.15137e-07	7.4754e-06	490	6e-100	0.89	KU577289.1	Junonia iphita isolate MZ mitochondrion, complete genome	3
BA_contig_093915	23	13	pool1	0.00601828	0.042032	1187	8e-127	0.97	XR_002886782.1	PREDICTED: Bicyclus anynana uncharacterized LOC112045055 (LOC112045055), ncRNA	3
BA_contig_115452	25	13	pool1	0.00246023	0.0211411	2026	0	0.98	XM_024088949.1	PREDICTED: Bicyclus anynana uncharacterized LOC112050645 (LOC112050645), mRNA	3
BA_contig_080989	25	11	pool1	0.000560723	0.00786359	1014	0	0.99	XM_024096379.1	PREDICTED: Bicyclus anynana uncharacterized LOC112056039 (LOC112056039), transcript variant X4, mRNA	3
BA_contig_111026	26	1	pool1	1.13486e-09	1.9894e-07	840	3e-05	0.93	KX778610.1	Bicyclus anynana clone scaffold223+ genomic sequence	3
BA_contig_080258	27	1	pool1	4.77802e-10	9.30652e-08	882	9e-31	0.92	KX778610.1	Bicyclus anynana clone scaffold223+ genomic sequence	3
BA_contig_081283	28	18	pool1	0.006502	0.0443502	2341	0	0.99	XM_024085247.1	PREDICTED: Bicyclus anynana uncharacterized LOC112047923 (LOC112047923), transcript variant X3, mRNA	3
BA_contig_115592	34	20	pool1	0.0012228	0.0117778	2912	3e-45	0.85	KX778610.1	Bicyclus anynana clone scaffold223+ genomic sequence	3
BA_CP6J1.1.3	37	10	pool1	1.29073e-07	8.08088e-06	2578	0	0.99	XM_024078000.1	PREDICTED: Bicyclus anynana uncharacterized LOC112042826 (LOC112042826), mRNA	3
BA_contig_115845	43	11	pool1	1.0498e-08	1.08253e-06	697	0	1	XM_024091898.1	PREDICTED: Bicyclus anynana uncharacterized LOC112052717 (LOC112052717), mRNA	3
BA_contig_034998	10	2	pool1	0.00515512	0.0408911	505				no significant similarity found	4
BA_contig_112377	10	1	pool1	0.000860587	0.0109319	454				no significant similarity found	4
BA_contig_115132	10	1	pool1	0.000860587	0.0109319	395				no significant similarity found	4
BA_LOC100141794.9.18	10	1	pool1	0.000860587	0.0109319	1080				no significant similarity found	4
BA_contig_081894	10	1	pool1	0.000860587	0.0109319	1171				no significant similarity found	4
BA_contig_094955	10	2	pool1	0.00515512	0.0408911	1090				no significant similarity found	4
BA_contig_109394	10	1	pool1	0.000860587	0.0109319	180				no significant similarity found	4
BA_contig_083168	10	1	pool1	0.000860587	0.0109319	698				no significant similarity found	4
BA_contig_033244	10	1	pool1	0.000860587	0.0109319	129				no significant similarity found	4
BA_contig_015740	11	3	pool1	0.00523323	0.0374443	467				no significant similarity found	4
BA_contig_100956	15	2	pool1	7.19852e-05	0.00163883	1119				no significant similarity found	4
BA_contig_102817	15	1	pool1	1.36651e-05	0.00046067	470				no significant similarity found	4
BA_contig_095397	15	1	pool1	1.36651e-05	0.00046067	787				no significant similarity found	4
BA_LOC100142518.2.3	15	3	pool1	0.000350232	0.00601919	1636				no significant similarity found	4
BA_contig_081046	17	4	pool1	0.000215222	0.00397142	493				no significant similarity found	4
BA_contig_081604	20	8	pool1	0.00152964	0.0139659	1516				no significant similarity found	4
BA_contig_115369	23	10	pool1	0.00106919	0.0104127	927				no significant similarity found	4
BA_contig_080524	25	10	pool1	0.000386017	0.00583351	1815				no significant similarity found	4
BA_contig_081182	45	29	pool1	0.00052865	0.00759609	1237				no significant similarity found	4

## Sheet: Lib6_only
#contigName	countPool1	length	max score	total score	query cover	e value	ident	accession	blast.name	type
BA_contig_101106	10	991	135	288	0.26	4e-27	0.9231	XM_024079666.1	PREDICTED: Bicyclus anynana acyl-CoA Delta(11) desaturase-like (LOC112043964), transcript variant X4, mRNA	1
BA_contig_033256	10	303	206	206	0.4	4e-49	0.959	XM_024095500.1	PREDICTED: Bicyclus anynana uncharacterized oxidoreductase SERP2049-like (LOC112055410), mRNA	1
BA_contig_033254	10	458	79.5	79.5	0.08	1e-10	1	XM_024090890.1	PREDICTED: Bicyclus anynana lipase 1-like (LOC112052005), mRNA	1
BA_contig_033252	10	268	43	43	0.08	5.5	1	NG_003302.2	Mus musculus olfactory receptor 428, pseudogene 1 (Olfr428-ps1) on chromosome 1	1
BA_contig_033241	10	361	68	68	0.11	2e-07	0.9512	XM_024080793.1	PREDICTED: Bicyclus anynana general odorant-binding protein 2-like (LOC112044819), transcript variant X2, mRNA	1
BA_contig_033240	10	250	71.8	71.8	0.35	1e-08	0.8222	XM_024085365.1	PREDICTED: Bicyclus anynana 3-hydroxyacyl-CoA dehydrogenase type-2-like (LOC112048026), mRNA	1
BA_contig_033232	10	357	52.6	52.6	0.21	0.01	0.7867	XM_024093259.1	PREDICTED: Bicyclus anynana major facilitator superfamily domain-containing protein 12-like (LOC112053732), mRNA	1
BA_contig_033224	10	122	110	110	1	1e-20	0.918	XM_024078555.1	PREDICTED: Bicyclus anynana long-chain fatty acid transport protein 1-like (LOC112043234), mRNA	1
BA_contig_033219	10	439	87.2	130	0.21	5e-13	0.9048	XM_024084153.1	PREDICTED: Bicyclus anynana ejaculatory bulb-specific protein 3-like (LOC112047146), mRNA	1
BA_contig_033184	10	111	73.7	118	0.6	1e-09	0.9545	XM_024086738.1	PREDICTED: Bicyclus anynana ejaculatory bulb-specific protein 3-like (LOC112049012), mRNA	1
BA_contig_033259	10	496	52.6	52.6	0.07	0.014	0.9167	XM_024092613.1	PREDICTED: Bicyclus anynana phospholipase A1-like (LOC112053242), mRNA	2
BA_contig_047678	10	270	315	390	0.88	7e-82	0.9731	XM_024079174.1	PREDICTED: Bicyclus anynana GRIP and coiled-coil domain-containing protein 1 (LOC112043662), mRNA	2
BA_TCTP.4.12	10	371	348	348	0.5	9e-92	1	XM_024090710.1	PREDICTED: Bicyclus anynana translationally-controlled tumor protein homolog (LOC112051884), mRNA	2
BA_LGUL.3.3	10	902	1528	1528	0.98	0	0.9776	XM_024083437.1	PREDICTED: Bicyclus anynana lactoylglutathione lyase (LOC112046700), transcript variant X1, mRNA	2
BA_LOC657205.1.1	10	1066	1860	1860	0.99	0	0.984	XM_024081472.1	PREDICTED: Bicyclus anynana PI-PLC X domain-containing protein 3 (LOC112045327), transcript variant X6, mRNA	2
BA_contig_092359	10	682	169	169	0.13	2e-39	1	XM_024083815.1	PREDICTED: Bicyclus anynana calmodulin-like protein 4 (LOC112046950), transcript variant X2, mRNA	2
BA_contig_119769	10	233	50.7	50.7	0.15	0.023	91.43	XM_024080714.1	PREDICTED: Bicyclus anynana rho GTPase-activating protein 44 (LOC112044760), mRNA	2
BA_LOC100680200.1.1	10	906	1681	1681	1	0	0.9934	XM_024092894.1	PREDICTED: Bicyclus anynana N-acetylglucosaminyl-phosphatidylinositol biosynthetic protein (LOC112053479), mRNA	2
BA_LOC764941.27.51	10	1157	56.4	103	0.18	0.002	0.744	XM_024079926.1	PREDICTED: Bicyclus anynana craniofacial development protein 2-like (LOC112044173), mRNA	2
BA_AGAP_AGAP008584.1.1	10	953	1406	1485	0.89	0	0.9656	XM_024087510.1	PREDICTED: Bicyclus anynana lysosomal alpha-mannosidase-like (LOC112049567), mRNA	2
BA_contig_091214	10	316	85.3	85.3	0.16	1e-12	0.9808	XM_024097538.1	PREDICTED: Bicyclus anynana glutamate--cysteine ligase regulatory subunit-like (LOC112057046), partial mRNA	2
BA_LOC656581.1.1	10	543	627	811	0.79	1e-175	0.9719	XM_024078829.1	PREDICTED: Bicyclus anynana oxysterol-binding protein-related protein 11 (LOC112043423), mRNA	2
BA_NDUF5.1.1	10	354	573	573	0.94	1e-159	0.9794	XM_024081200.1	PREDICTED: Bicyclus anynana arginine-hydroxylase NDUFAF5, mitochondrial (LOC112045118), mRNA	2
BA_contig_038231	10	174	217	217	0.93	7e-53	0.9506	XM_024092009.1	PREDICTED: Bicyclus anynana proteoglycan 4-like (LOC112052788), mRNA	2
BA_contig_098889	10	685	1261	1261	0.95	0	1	XM_024097416.1	PREDICTED: Bicyclus anynana protein ANTAGONIST OF LIKE HETEROCHROMATIN PROTEIN 1-like (LOC112056930), mRNA	2
BA_contig_113775	10	478	54.5	54.5	0.1	0.003	0.8824	XM_019061047.1	PREDICTED: Bemisia tabaci hepatocyte nuclear factor 4-beta-like (LOC109043749), transcript variant X2, mRNA	2
BA_LOC100872776.1.1	10	1288	2363	2363	0.98	0	0.9922	XM_024091019.1	PREDICTED: Bicyclus anynana probable RNA helicase armi (LOC112052089), transcript variant X2, mRNA	2
BA_LOC100876012.1.1	10	1118	996	1658	0.79	0	0.9981	XM_024089920.1	PREDICTED: Bicyclus anynana uridine phosphorylase 1 (LOC112051321), mRNA	2
BA_contig_005006	10	385	506	506	0.7	3e-139	0.9963	XM_024090507.1	PREDICTED: Bicyclus anynana CDGSH iron-sulfur domain-containing protein 2 homolog (LOC112051727), mRNA	2
BA_contig_083569	10	469	81.4	81.4	0.13	3e-11	0.8889	XM_024086952.1	PREDICTED: Bicyclus anynana probable pyruvate dehydrogenase E1 component subunit alpha, mitochondrial (LOC112049153), mRNA	2
BA_contig_086820	10	668	1004	1004	1	0	0.9483	XM_024090336.1	PREDICTED: Bicyclus anynana 14-3-3 protein epsilon (LOC112051622), mRNA	2
BA_LOC692799.1.2	10	680	450	450	0.63	3e-122	0.8565	XM_024089867.1	PREDICTED: Bicyclus anynana cyclin-dependent kinases regulatory subunit-like (LOC112051286), mRNA	2
BA_LOC778466.16.16	10	766	1210	1210	0.98	0	0.9458	XR_002887542.1	PREDICTED: Bicyclus anynana prostaglandin reductase 1 pseudogene (LOC112055912), misc_RNA	2
BA_contig_088396	10	676	1213	1213	1	0	0.9897	XM_024091534.1	PREDICTED: Bicyclus anynana serine-rich adhesin for platelets (LOC112052449), transcript variant X2, mRNA	2
BA_contig_088385	10	701	139	139	0.22	2e-28	0.8526	XM_021349411.1	PREDICTED: Bombyx mori MAGUK p55 subfamily member 5 (LOC101742023), transcript variant X6, mRNA	2
BA_BL1S5.2.2	10	588	719	780	0.72	0	0.9898	XM_024091621.1	PREDICTED: Bicyclus anynana biogenesis of lysosome-related organelles complex 1 subunit 5 (LOC112052510), transcript variant X1, mRNA	2
BA_BL1S5.1.2	10	448	690	690	0.97	0	0.9564	XM_024091622.1	PREDICTED: Bicyclus anynana biogenesis of lysosome-related organelles complex 1 subunit 5 (LOC112052510), transcript variant X2, mRNA	2
BA_contig_092154	10	580	223	223	0.2	5e-54	0.9916	XM_024090248.1	PREDICTED: Bicyclus anynana RIMS-binding protein 2 (LOC112051556), transcript variant X3, mRNA	2
BA_JM.5.5	10	1486	2673	2673	0.98	0	0.9823	XM_024086043.1	PREDICTED: Bicyclus anynana COP9 signalosome complex subunit 5 (LOC112048509), mRNA	2
BA_contig_034353	10	523	440	440	0.47	2e-119	0.972	XM_024095904.1	PREDICTED: Bicyclus anynana cysteine-rich PDZ-binding protein-like (LOC112055717), mRNA	2
BA_contig_033262	10	456	44.9	44.9	0.05	2.6	1	XM_008185650.2	PREDICTED: Acyrthosiphon pisum protein prickle (LOC100159889), transcript variant X2, mRNA	2
BA_LOC411142.1.1	10	315	579	579	1	2e-161	0.9905	XM_024091179.1	PREDICTED: Bicyclus anynana solute carrier family 25 member 46-like (LOC112052191), mRNA	2
BA_contig_081281	10	801	427	427	0.37	3e-115	0.9568	KC996755.1	Bicyclus anynana NBAD hydrolase (tan) mRNA, partial cds	2
BA_contig_033258	10	271	91.1	91.1	0.25	2e-14	0.8971	XM_024088102.1	PREDICTED: Bicyclus anynana trichoplein keratin filament-binding protein-like (LOC112049995), transcript variant X3, mRNA	2
BA_contig_033257	10	367	540	540	1	1e-149	0.9484	XR_002886702.1	PREDICTED: Bicyclus anynana CCR4-NOT transcription complex subunit 1 (LOC112043807), transcript variant X5, misc_RNA	2
BA_contig_033255	10	371	627	627	0.9	9e-176	0.9941	XM_024086386.1	PREDICTED: Bicyclus anynana HEAT repeat-containing protein 1 (LOC112048734), mRNA	2
BA_contig_033253	10	364	515	525	0.96	3e-142	0.9314	XM_024083676.1	PREDICTED: Bicyclus anynana activating signal cointegrator 1 complex subunit 3 (LOC112046854), mRNA	2
BA_contig_033251	10	114	48.8	48.8	0.21	0.037	1	LN835309.1	Plasmodium relictum strain SGS1 genome assembly, chromosome: 14	2
BA_contig_033250	10	285	43	43	0.1	5.8	90.32	CP023335.1/CP023329.1	Drosophila melanogaster strain rover (forR) chromosome X/Drosophila melanogaster strain sitter (fors) chromosome X	2
BA_contig_033248	10	103	87.2	1371	0.82	8e-14	0.875	KX778609.1	Bicyclus anynana clone scaffold467+ genomic sequence	2
BA_contig_033245	10	468	46.8	46.8	0.05	0.69	1	CP021151.1	Photobacterium damselae subsp. damselae strain KC-Na-1 chromosome I, complete sequence	2
BA_contig_033242	10	166	44.9	44.9	0.19	0.83	0.9062	MH936550.1	Dysphania pumilio chloroplast, complete genome	2
BA_contig_033239	10	397	162	162	0.4	1e-35	0.9245	XM_024088603.1	PREDICTED: Bicyclus anynana valacyclovir hydrolase-like (LOC112050349), mRNA	2
BA_contig_033238	10	118	50.7	50.7	0.27	0.01	0.9375	XM_024094844.1	PREDICTED: Bicyclus anynana tetraspanin-7-like (LOC112054901), mRNA	2
BA_contig_033237	10	217	94.9	143	0.25	1e-15	0.9636	XM_024093022.1	PREDICTED: Bicyclus anynana dnaJ homolog subfamily A member 1-like (LOC112053563), mRNA	2
BA_LOC101257086.1.1	10	320	46.8	46.8	0.07	0.46	1	XM_024230932.1	PREDICTED: Pongo abelii protocadherin 20 (PCDH20), mRNA	2
BA_contig_084528	10	462	44.9	44.9	0.06	2.6	0.931	XM_024081308.1	PREDICTED: Bicyclus anynana netrin receptor UNC5B-like (LOC112045213), mRNA	2
BA_contig_033234	10	286	50.7	50.7	0.11	0.028	0.9375	CP032232.1	Anopheles stephensi strain SDA-500 chromosome 2R	2
BA_contig_033233	10	326	56.4	112	0.08	0.0006	1	LR131491.1	Plasmodium falciparum genome assembly, chromosome: 11	2
BA_UBCD1.1.3	10	254	325	325	1	4e-85	0.9409	XM_024084312.1	PREDICTED: Bicyclus anynana ubiquitin-conjugating enzyme E2-17 kDa (LOC112047257), transcript variant X3, mRNA	2
BA_contig_033229	10	376	48.8	48.8	0.06	0.15	1	CP023339.1	Drosophila melanogaster strain rover (forR) chromosome 2L	2
BA_contig_033227	10	366	654	654	1	0	0.9809	XM_024080077.1	PREDICTED: Bicyclus anynana fasciclin-2-like (LOC112044142), transcript variant X3, mRNA	2
BA_contig_033226	10	326	102	102	0.28	8e-18	0.8587	XM_024081449.1	PREDICTED: Bicyclus anynana NAD kinase-like (LOC112045313), transcript variant X6, mRNA	2
BA_contig_033225	10	359	46.8	46.8	0.08	0.52	0.9333	CP002899.1	Weissella koreensis KACC 15510, complete genome	2
BA_UB2D4.1.1	10	209	237	237	1	1e-58	0.9426	XM_024084312.1	PREDICTED: Bicyclus anynana ubiquitin-conjugating enzyme E2-17 kDa (LOC112047257), transcript variant X3, mRNA	2
BA_LOC100115407.3.6	10	488	506	799	0.97	3e-139	0.9659	XM_024096922.1	PREDICTED: Bicyclus anynana translocon-associated protein subunit delta-like (LOC112056486), mRNA	2
BA_contig_033221	10	252	46.8	46.8	0.11	0.35	0.9333	XM_024089758.1	PREDICTED: Bicyclus anynana protein outspread (LOC112051193), transcript variant X4, mRNA	2
BA_contig_033220	10	156	44.9	44.9	0.18	0.77	0.931	XM_018494453.1	PREDICTED: Trachymyrmex septentrionalis phospholipid-transporting ATPase ID (LOC108753111), transcript variant X6, mRNA	2
BA_contig_033218	10	126	166	166	0.86	2e-37	0.9474	XM_024094445.1	PREDICTED: Bicyclus anynana ornithine decarboxylase 2-like (LOC112054602), mRNA	2
BA_contig_033217	10	426	81.4	81.4	0.18	2e-11	0.8725	XM_024085225.1	PREDICTED: Bicyclus anynana synaptic vesicle glycoprotein 2C-like (LOC112047922), transcript variant X1, mRNA	2
BA_contig_033215	10	140	98.7	143	0.87	4e-17	0.9028	XM_024085950.1	PREDICTED: Bicyclus anynana phosphatidylinositol transfer protein alpha isoform (LOC112048428), mRNA	2
BA_IKZF3.1.1	10	104	112	785	0.89	3e-21	0.9	XM_024095133.1	PREDICTED: Bicyclus anynana gastrula zinc finger protein XlCGF8.2DB-like (LOC112055130), transcript variant X1, mRNA	2
BA_contig_033213	10	385	46.8	46.8	0.21	0.56	0.8049	XM_024092375.1	PREDICTED: Bicyclus anynana transcription factor collier (LOC112053089), transcript variant X4, mRNA	2
BA_LOC100645786.1.1	10	434	56.4	107	0.3	0.0008	0.9024	XM_014508922.1	PREDICTED: Papilio machaon nucleic-acid-binding protein from mobile element jockey-like (LOC106715602), mRNA	2
BA_contig_033211	10	514	948	48	1	0	0.9922	XM_024091009.1	PREDICTED: Bicyclus anynana lamin-C-like (LOC112052084), mRNA	2
BA_contig_033210	10	421	185	185	0.36	1e-42	0.8758	XM_024080089.1	PREDICTED: Bicyclus anynana YEATS domain-containing protein 4 (LOC112044286), mRNA	2
BA_CPIPJ_CPIJ007052.1.1	10	1217	1992	1992	0.91	0	0.9811	XM_024084330.1	PREDICTED: Bicyclus anynana ribosome biogenesis protein TSR3 homolog (LOC112047261), mRNA	2
BA_contig_033209	10	401	48.8	48.8	0.06	0.16	1	XM_024087325.1	PREDICTED: Bicyclus anynana circadian clock-controlled protein-like (LOC112049449), mRNA	2
BA_contig_033208	10	306	450	450	1	1e-122	0.9578	XM_024095966.1	PREDICTED: Bicyclus anynana NUAK family SNF1-like kinase 1 (LOC112055740), transcript variant X5, mRNA	2
BA_contig_033207	10	124	69.9	69.9	0.29	2e-08	1	XM_024087779.1	PREDICTED: Bicyclus anynana chitinase-like protein EN03 (LOC112049752), transcript variant X4, mRNA	2
BA_contig_033206	10	356	46.8	46.8	0.08	0.52	0.931	XM_015323663.1	PREDICTED: Polistes dominula dopamine receptor 2 (LOC107067823), transcript variant X1, mRNA	2
BA_contig_033205	10	396	639	639	1	3e-179	0.9545	XM_024079262.1	PREDICTED: Bicyclus anynana serine/arginine repetitive matrix protein 4 (LOC112043700), transcript variant X6, mRNA	2
BA_contig_033204	10	345	43	43	0.06	7.2	1	XM_012312143.2	PREDICTED: Bombus terrestris upstream stimulatory factor 2 (LOC100643125), transcript variant X2, mRNA	2
BA_contig_033201	10	378	392	392	1	4e-105	0.8945	XM_024079584.1	PREDICTED: Bicyclus anynana formin-2 (LOC112043917), transcript variant X2, mRNA	2
BA_contig_033200	10	128	41.1	41.1	0.16	8.8	1	CP023339.1/CP023333.1	Drosophila melanogaster strain rover (forR) chromosome 2L/Drosophila melanogaster strain sitter (fors) chromosome 2L	2
BA_contig_116216	10	384	656	656	0.92	0	0.9888	XM_024083254.1	PREDICTED: Bicyclus anynana nose resistant to fluoxetine protein 6-like (LOC112046566), mRNA	2
BA_contig_092739	10	872	167	167	0.17	5e-37	0.8684	XM_024085950.1	PREDICTED: Bicyclus anynana phosphatidylinositol transfer protein alpha isoform (LOC112048428), mRNA	2
BA_contig_042529	10	304	364	364	0.98	1e-96	0.9433	XM_024090462.1	PREDICTED: Bicyclus anynana opsin-3-like (LOC112051689), mRNA	2
BA_MTRR.2.2	10	1556	2853	2853	0.99	0	0.9883	XM_024098803.1	PREDICTED: Bicyclus anynana methionine synthase reductase (LOC112058113), mRNA	2
BA_JHEH-LP5.87.92	10	612	183	183	0.18	7e-42	0.9397	XM_024084893.1	PREDICTED: Bicyclus anynana fatty-acid amide hydrolase 2-A-like (LOC112047690), transcript variant X2, mRNA	2
BA_LOC692939.5.6	10	513	542	928	0.97	4e-150	0.9834	XM_024079111.1	PREDICTED: Bicyclus anynana glutamate dehydrogenase, mitochondrial (LOC112043616), mRNA	2
BA_LOC100865273.2.2	10	921	1652	1652	0.98	0	0.9923	XM_024084615.1	PREDICTED: Bicyclus anynana synaptosomal-associated protein 25 (LOC112047485), transcript variant X3, mRNA	2
BA_contig_033199	10	406	75.7	75.7	0.11	1e-09	0.9375	XM_024096399.1	PREDICTED: Bicyclus anynana toll-interacting protein-like (LOC112056060), mRNA	2
BA_contig_033198	10	120	50.7	50.7	0.24	0	0.9655	CP018162.1	Oryza sativa Indica Group cultivar Shuhui498 chromosome 6 sequence	2
BA_contig_033195	10	385	62.2	62.2	0.15	1e-05	0.8475	XM_024090937.1	PREDICTED: Bicyclus anynana neuropathy target esterase sws (LOC112052039), transcript variant X8, mRNA	2
BA_contig_033194	10	357	75.7	75.7	0.13	1e-09	0.9375	XM_024092509.1	PREDICTED: Bicyclus anynana late secretory pathway protein AVL9 homolog (LOC112053183), mRNA	2
BA_contig_033192	10	399	48.8	48.8	0.07	0.16	0.9643	AC174280.11	Medicago truncatula clone mth2-11n6, complete sequence	2
BA_contig_033191	10	407	156	346	0.45	6e-34	0.8263	XM_024080013.1	PREDICTED: Bicyclus anynana F-box/WD repeat-containing protein 9-like (LOC112044241), transcript variant X5, mRNA	2
BA_LOC100121462.2.2	10	529	625	676	0.76	5e-175	0.9689	XM_024093761.1	PREDICTED: Bicyclus anynana CD63 antigen-like (LOC112054104), transcript variant X2, mRNA	2
BA_contig_033189	10	113	52.6	179	0.29	0.004	0.9394	LT594791.1	Theobroma cacao genome assembly, chromosome: IV	2
BA_contig_033188	10	108	93	93	0.89	2e-15	0.866	XM_024092765.1	PREDICTED: Bicyclus anynana katanin p80 WD40 repeat-containing subunit B1 (LOC112053364), transcript variant X4, mRNA	2
BA_contig_033186	10	309	50.7	50.7	0.08	0.031	1	XM_026885793.1	PREDICTED: Trichoplusia ni rhythmically expressed gene 2 protein-like (LOC113503717), mRNA	2
BA_contig_033185	10	148	116	116	0.59	3e-22	0.9091	XM_024086630.1	PREDICTED: Bicyclus anynana alpha-tocopherol transfer protein-like (LOC112048923), mRNA	2
BA_contig_033183	10	340	46.8	46.8	0.07	0.5	0.963	XM_013260454.1	PREDICTED: Stomoxys calcitrans cytochrome P450 18a1 (LOC106093399), mRNA	2
BA_contig_033181	10	230	369	369	0.93	2e-98	0.9721	XM_024080795.1	PREDICTED: Bicyclus anynana prolyl 4-hydroxylase subunit alpha-1 (LOC112044795), transcript variant X5, mRNA	2
BA_contig_033180	10	181	43	43	0.13	3.5	0.96	XM_020789408.1	PREDICTED: Pogona vitticeps beta-1,3-galactosyltransferase 1 (B3GALT1), mRNA	2
BA_contig_033179	10	217	144	144	0.72	9e-31	0.8987	XM_024083213.1	PREDICTED: Bicyclus anynana paired box protein Pax-6-like (LOC112046545), mRNA	2
BA_contig_033178	10	194	43	43	0.15	3.8	0.9032	XM_010713023.2	PREDICTED: Meleagris gallopavo NME/NM23 family member 8 (NME8), transcript variant X9, mRNA	2
BA_contig_033176	10	381	169	169	0.43	5e-38	0.8434	XM_024083974.1	PREDICTED: Bicyclus anynana ceramide-1-phosphate transfer protein (LOC112047061), mRNA	2
BA_contig_033174	10	130	187	187	0.91	9e-44	0.95	XM_024078359.1	PREDICTED: Bicyclus anynana D-beta-hydroxybutyrate dehydrogenase, mitochondrial (LOC112043092), mRNA	2
BA_contig_033173	10	119	48.8	48.8	0.28	0.039	0.9118	LN483462.1	Culicoides sonorensis genome assembly, scaffold: scaffold112	2
BA_LOC100862770.1.2	10	559	937	937	0.92	0	0.9827	XM_024078732.1	PREDICTED: Bicyclus anynana zinc finger protein 622 (LOC112043351), mRNA	2
BA_contig_106396	10	1099	1888	1888	1	0	0.9702	XM_024089671.1	PREDICTED: Bicyclus anynana histone-lysine N-methyltransferase trithorax (LOC112051161), mRNA	2
BA_contig_118303	10	449	54.5	54.5	0.03	0.008	0.9412	XM_024094256.1	PREDICTED: Bicyclus anynana zinc finger protein OZF-like (LOC112054464), mRNA	2
BA_contig_089203	10	718	54.5	54.5	6$	0.005	0.8571	CP031230.1	Sporosarcina sp. PTS2304 chromosome, complete genome	2
BA_LOC100882426.2.2	10	1055	1906	1906	0.98	0	0.9855	XM_024081311.1	PREDICTED: Bicyclus anynana NAD(P)H-hydrate epimerase (LOC112045217), mRNA	2
BA_PGBM.3.3	10	560	1042	1042	1	0	0.8993	XM_024078084.1	PREDICTED: Bicyclus anynana basement membrane-specific heparan sulfate proteoglycan core protein (LOC112042894), transcript variant X3, mRNA	2
BA_LOC100651528.1.2	10	718	1371	1371	0.99	0	0.9986	XM_024078601.1	PREDICTED: Bicyclus anynana pantothenate kinase 4 (LOC112043282), transcript variant X1, mRNA	2
BA_contig_112310	10	462	488	48.8	0.07	0.18	0.9118	XM_017049158.1	PREDICTED: Apis cerana metallo-beta-lactamase domain-containing protein 1 (LOC107993002), mRNA	2
BA_contig_095873	10	229	396	396	0.95	1e-106	0.9817	XM_024079223.1	PREDICTED: Bicyclus anynana ras-related protein Rab-3 (LOC112043703), transcript variant X2, mRNA	2
BA_contig_111832	10	662	46.8	46.8	0.04	1	0.963	LT594624.1	Plasmodium malariae genome assembly, chromosome: 3	2
BA_CPIPJ_CPIJ007338.1.1	10	762	1383	1383	0.98	0	0.992	XM_024095517.1	PREDICTED: Bicyclus anynana 2-oxoglutarate dehydrogenase, mitochondrial (LOC112055393), transcript variant X6, mRNA	2
BA_contig_081606	10	809	1485	1485	1	0	0.9975	XM_024082103.1	PREDICTED: Bicyclus anynana retinol dehydrogenase 11-like (LOC112045780), mRNA	2
BA_contig_101376	10	486	859	859	0.98	0	0.9896	XM_024082699.1	PREDICTED: Bicyclus anynana zinc finger protein 37-like (LOC112046166), transcript variant X5, mRNA	2
BA_HOOK.1.1	10	393	662	662	0.99	0	0.9721	XM_024091027.1	PREDICTED: Bicyclus anynana protein hook-like (LOC112052095), mRNA	2
BA_contig_061387	10	484	449	449	0.5	3e-122	1	XM_024087682.1	PREDICTED: Bicyclus anynana ubiquitin carboxyl-terminal hydrolase 7-like (LOC112049686), partial mRNA	2
BA_contig_094627	10	1006	1570	1570	0.84	0	0.9988	XM_024098774.1	PREDICTED: Bicyclus anynana serine/threonine-protein kinase MARK2-like (LOC112058090), transcript variant X6, mRNA	2
BA_LOC100167780.331.426	10	458	283	283	0.38	3e-72	0.9605	XM_024088478.1	PREDICTED: Bicyclus anynana sodium- and chloride-dependent transporter XTRP3 (LOC112050257), transcript variant X1, mRNA	2
BA_contig_053713	10	377	654	654	0.97	0	0.9891	XM_024087175.1	PREDICTED: Bicyclus anynana sodium/potassium-transporting ATPase subunit beta-2 (LOC112049325), mRNA	2
BA_LOC101171734.1.3	10	477	337	337	0.39	3e-88	0.9894	XM_024095610.1	PREDICTED: Bicyclus anynana ornithine decarboxylase-like (LOC112055478), partial mRNA	2
BA_DVIR_GJ21955.1.1	10	1689	2808	2808	0.95	0	0.982	XM_024098302.1	PREDICTED: Bicyclus anynana testin (LOC112057760), transcript variant X1, mRNA	2
BA_LOC732955.1.3	10	474	798	798	0.98	0	0.9785	XM_024081364.1	PREDICTED: Bicyclus anynana U6 snRNA-associated Sm-like protein LSm3 (LOC112045252), mRNA	2
BA_contig_089726	11	1033	119	119	0.13	2e-22	0.8276	XM_024097624.1	PREDICTED: Bicyclus anynana histone acetyltransferase type B catalytic subunit-like (LOC112057136), mRNA	2
BA_SYNC.2.2	12	2363	4054	4054	0.99	0	0.9749	XM_024088248.1	PREDICTED: Bicyclus anynana asparagine--tRNA ligase, cytoplasmic (LOC112050096), mRNA	2
BA_EAS.2.3	12	909	1578	1578	0.98	0	0.9877	XM_024093568.1	PREDICTED: Bicyclus anynana ethanolamine kinase (LOC112053946), mRNA	2
BA_FNBP1.1.1	13	1129	1853	1853	0.91	0	0.9903	XM_024088371.1	PREDICTED: Bicyclus anynana formin-binding protein 1-like (LOC112050179), transcript variant X5, mRNA	2
BA_contig_104405	15	301	150	150	0.35	2e-32	0.9182	XM_024097563.1	PREDICTED: Bicyclus anynana putative inorganic phosphate cotransporter (LOC112057072), mRNA	2
BA_OLA1.1.1	15	1901	3382	3382	0.96	0	0.9984	XM_024094601.1	PREDICTED: Bicyclus anynana obg-like ATPase 1 (LOC112054724), transcript variant X4, mRNA	2
BA_contig_092210	15	579	1011	1011	0.94	0	1	XM_024085344.1	PREDICTED: Bicyclus anynana caspase Dronc (LOC112048012), mRNA	2
BA_contig_097081	15	931	104	104	0.08	6e-18	0.9091	XM_024088705.1	PREDICTED: Bicyclus anynana nostrin (LOC112050432), mRNA	2
BA_PHUM_PHUM258700.1.1	15	1327	2342	2342	1	0	0.9857	XM_024094755.1	PREDICTED: Bicyclus anynana tRNA-specific adenosine deaminase 1 (LOC112054841), mRNA	2
BA_U587.1.1	15	684	1122	1122	0.97	0	0.9714	XM_024093163.1	PREDICTED: Bicyclus anynana UPF0587 protein GA18326 (LOC112053677), mRNA	2
BA_contig_088840	15	832	1513	1513	0.99	0	0.9976	XM_024085401.1	PREDICTED: Bicyclus anynana CDP-diacylglycerol--inositol 3-phosphatidyltransferase (LOC112048048), mRNA	2
BA_contig_033172	15	209	243	243	0.71	2e-60	0.96	XM_024082389.1	PREDICTED: Bicyclus anynana WD repeat-containing protein 7 (LOC112045964), transcript variant X3, mRNA	2
BA_contig_033169	15	394	128	128	0.22	1e-25	0.9222	XM_024079234.1	PREDICTED: Bicyclus anynana pancreatic lipase-related protein 2 (LOC112043711), mRNA	2
BA_LOC692981.1.2	15	282	464	464	1	7e-127	0.9681	XM_024080632.1	PREDICTED: Bicyclus anynana thioredoxin, mitochondrial-like (LOC112044708), mRNA	2
BA_AAEL_AAEL008010.1.1	15	463	761	761	0.97	0	0.9713	XM_024083810.1	PREDICTED: Bicyclus anynana hemicentin-2-like (LOC112046945), transcript variant X6, mRNA	2
BA_contig_033161	15	510	438	438	0.48	8e-119	0.9879	XM_024093402.1	PREDICTED: Bicyclus anynana type I inositol 1,4,5-trisphosphate 5-phosphatase-like (LOC112053838), mRNA	2
BA_contig_033156	15	145	147	147	0.54	1e-31	1	XM_024081991.1	PREDICTED: Bicyclus anynana gastrula zinc finger protein XlCGF49.1-like (LOC112045706), mRNA	2
BA_CPIPJ_CPIJ016407.1.1	15	764	1151	1304	0.98	0	0.9697	XM_024094411.1	PREDICTED: Bicyclus anynana 26S proteasome regulatory subunit 6A-B (LOC112054572), mRNA	2
BA_VATG.2.2	15	351	599	599	1	2e-167	0.9772	XM_024078529.1	PREDICTED: Bicyclus anynana V-type proton ATPase subunit G (LOC112043217), mRNA	2
BA_SEHL2.1.1	15	862	1482	1482	0.95	0	0.9927	XM_024097148.1	PREDICTED: Bicyclus anynana serine hydrolase-like protein 2 (LOC112056684), mRNA	2
BA_contig_092459	15	763	503	503	0.38	4e-138	0.986	XM_024099504.1	PREDICTED: Bicyclus anynana neither inactivation nor afterpotential protein C (LOC112058597), mRNA	2
BA_PHUM_PHUM351010.1.1	15	1350	2130	2130	0.91	0	0.9741	XM_024091915.1	PREDICTED: Bicyclus anynana phosphatidylinositol N-acetylglucosaminyltransferase subunit P (LOC112052723), transcript variant X2, mRNA	2
BA_TVAG_106580.1.1	15	2418	3995	3995	0.95	0	0.9801	XM_024095756.1	PREDICTED: Bicyclus anynana tyrosine-protein phosphatase non-receptor type 23 (LOC112055574), mRNA	2
BA_LOC100120759.1.1	16	1255	1391	1391	0.6	0	0.9948	XM_024082792.1	PREDICTED: Bicyclus anynana transmembrane 9 superfamily member 3 (LOC112046221), mRNA	2
BA_HANG.1.1	17	719	1293	1293	0.98	0	0.9972	XM_024096126.1	PREDICTED: Bicyclus anynana gastrula zinc finger protein XlCGF26.1-like (LOC112055851), mRNA	2
BA_LOC661978.2.4	17	423	470	470	0.6	2e-128	0.9961	XM_024090598.1	PREDICTED: Bicyclus anynana glutamine synthetase-like (LOC112051806), mRNA	2
BA_LOC659838.2.2	20	458	614	614	0.74	1e-171	0.9912	XM_024096020.1	PREDICTED: Bicyclus anynana protein timeless homolog (LOC112055811), mRNA	2
BA_LOC100117150.1.1	20	168	274	274	0.89	7e-70	0.9934	XM_024084796.1	PREDICTED: Bicyclus anynana P protein-like (LOC112047624), transcript variant X3, mRNA	2
BA_contig_094387	20	1323	261	261	0.1	5e-65	0.9931	XM_024083574.1	PREDICTED: Bicyclus anynana alanyl-tRNA editing protein Aarsd1-like (LOC112046781), mRNA	2
BA_contig_102014	20	517	878	878	1	0	0.9768	XM_024080180.1	PREDICTED: Bicyclus anynana DDB1- and CUL4-associated factor 10 (LOC112044357), mRNA	2
BA_contig_088132	20	1578	2329	2329	0.89	0	0.9649	XM_024082470.1	PREDICTED: Bicyclus anynana protein nessun dorma (LOC112046025), mRNA	2
BA_contig_095294	20	1300	1362	1765	0.91	0	0.9299	XM_024096174.1	PREDICTED: Bicyclus anynana protein kinase C and casein kinase substrate in neurons protein 3-like (LOC112055884), transcript variant X3, mRNA	2
BA_contig_083051	21	667	130	130	0.18	7e-26	0.8538	XM_024080089.1	PREDICTED: Bicyclus anynana YEATS domain-containing protein 4 (LOC112044286), mRNA	2
BA_contig_101887	21	442	165	165	0.42	1e-36	0.8316	XM_021328954.1	PREDICTED: Helicoverpa armigera sodium- and chloride-dependent glycine transporter 1-like (LOC110372332), transcript variant X1, mRNA	2
BA_contig_091211	21	314	379	379	0.99	3e-101	0.8938	XM_024099492.1	PREDICTED: Bicyclus anynana monocarboxylate transporter 12-like (LOC112058585), mRNA	2
BA_contig_119688	21	583	259	259	0.51	7e-65	0.8278	XM_024083093.1	PREDICTED: Bicyclus anynana ubiquitin-like modifier-activating enzyme 1 (LOC112046470), mRNA	2
BA_contig_093021	21	208	231	231	0.86	5e-57	0.8978	XM_024085218.1	PREDICTED: Bicyclus anynana selenoprotein K-like (LOC112047915), mRNA	2
BA_contig_111567	25	1002	117	117	0.07	8e-22	0.9367	XM_021336389.1	PREDICTED: Helicoverpa armigera neuroendocrine convertase 2 (LOC110377468), mRNA	2
BA_contig_117810	25	600	132	132	0.11	2e-26	1	XM_024094836.1	PREDICTED: Bicyclus anynana aspartate aminotransferase, mitochondrial (LOC112054895), mRNA	2
BA_contig_095216	25	788	135	135	0.14	2e-27	0.8839	XM_024095803.1	PREDICTED: Bicyclus anynana putative histone-lysine N-methyltransferase 1 (LOC112055619), mRNA	2
BA_LOC660877.2.2	25	906	1602	1602	1	0	0.9857	XM_024087551.1	PREDICTED: Bicyclus anynana calcium-dependent secretion activator (LOC112049601), transcript variant X7, mRNA	2
BA_LOC659824.2.4	25	618	1092	1092	0.99	0	0.9855	XM_024082905.1	PREDICTED: Bicyclus anynana PHD finger protein rhinoceros (LOC112046297), transcript variant X4, mRNA	2
BA_T23O.1.3	29	830	1458	1458	0.98	0	0.989	XM_024097096.1	PREDICTED: Bicyclus anynana tryptophan 2,3-dioxygenase (LOC112056641), mRNA	2
BA_EAST.7.11	35	1016	933	1549	0.98	0	0.9619	XM_024099144.1	PREDICTED: Bicyclus anynana serine protease easter (LOC112058368), mRNA	2
BA_contig_110848	35	1201	148	148	0.26	4e-31	0.7785	XM_026631461.1	PREDICTED: Vanessa tameamea diphosphoinositol polyphosphate phosphohydrolase 2 (LOC113394227), mRNA	2
BA_UGPA.1.3	39	412	405	405	0.71	6e-109	0.9082	XM_024098226.1	PREDICTED: Bicyclus anynana UTP--glucose-1-phosphate uridylyltransferase (LOC112057705), transcript variant X3, mRNA	2
BA_contig_093622	39	581	928	928	0.95	0	0.9677	XM_024079174.1	PREDICTED: Bicyclus anynana GRIP and coiled-coil domain-containing protein 1 (LOC112043662), mRNA	2
BA_contig_094563	10	1059	108	108	0.08	5e-19	0.8953	XM_024087890.1	PREDICTED: Bicyclus anynana SOSS complex subunit B homolog (LOC112049849), mRNA	2
BA_contig_053638	10	314	164	164	0.3	2e-36	0.9588	XM_024080510.1	PREDICTED: Bicyclus anynana eukaryotic translation initiation factor 5A (LOC112044620), transcript variant X3, mRNA	2
BA_DANA_GF24504.1.1	10	353	483	635	0.95	2e-132	0.9961	XM_024099471.1	PREDICTED: Bicyclus anynana chromodomain-helicase-DNA-binding protein 8-like (LOC112058565), mRNA	2
BA_LOC692827.1.4	10	473	796	796	1	0	0.9619	XM_024093719.1	PREDICTED: Bicyclus anynana DNA polymerase subunit gamma-2, mitochondrial (LOC112054064), mRNA	2
BA_RL32.7.9	10	301	292	545	0.96	4e-75	1	XM_024081835.1	PREDICTED: Bicyclus anynana 60S ribosomal protein L32 (LOC112045583), mRNA	2
BA_contig_033203	10	285	48.8	48.8	0.1	0.11	0.9355	XM_017170998.1	PREDICTED: Drosophila kikkawai homeobox protein homothorax (LOC108077601), transcript variant X4, mRNA	2
BA_RPL8.3.8	10	413	573	745	0.98	2e-159	0.9752	XM_024084389.1	PREDICTED: Bicyclus anynana 60S ribosomal protein L8 (LOC112047303), mRNA	2
BA_contig_086078	10	203	171	171	0.53	7e-39	0.9541	JX185888.1	Mycalesis francisca 16S ribosomal RNA gene, partial sequence; tRNA-Val gene, complete sequence; and 12S ribosomal RNA gene, partial sequence; mitochondrial	2
BA_contig_033197	10	450	565	565	0.75	4e-157	0.9767	XM_024083610.1	PREDICTED: Bicyclus anynana Bloom syndrome protein homolog (LOC112046808), transcript variant X2, mRNA	2
BA_contig_033196	10	304	154	154	0.35	2e-33	0.9159	XM_024095197.1	PREDICTED: Bicyclus anynana cell growth-regulating nucleolar protein (LOC112055184), mRNA	2
BA_contig_033193	10	146	177	177	0.9	8e-41	0.9621	XM_024082890.1	PREDICTED: Bicyclus anynana cytochrome c oxidase assembly factor 3, mitochondrial (LOC112046291), mRNA	2
BA_LOC100120742.1.1	10	1132	2071	2071	1	0	0.9973	XM_024079816.1	PREDICTED: Bicyclus anynana nucleolar pre-ribosomal-associated protein 1 (LOC112044083), mRNA	2
BA_contig_082722	10	872	1483	1483	0.99	0	0.9759	XM_024084912.1	PREDICTED: Bicyclus anynana putative nucleotidyltransferase FAM46C (LOC112047706), transcript variant X2, mRNA	2
BA_LOC662468.1.1	10	495	883	883	0.97	0	0.9959	XM_024094429.1	PREDICTED: Bicyclus anynana putative RNA polymerase II subunit B1 CTD phosphatase Rpap2 (LOC112054592), mRNA	2
BA_CPIPJ_CPIJ004099.1.1	10	720	1254	1254	0.98	0	0.9859	XM_024096499.1	PREDICTED: Bicyclus anynana ATP-dependent RNA helicase SUV3 homolog, mitochondrial (LOC112056137), mRNA	2
BA_RM19.1.2	12	668	1003	1003	0.96	0	0.9479	XM_024083669.1	PREDICTED: Bicyclus anynana 39S ribosomal protein L19, mitochondrial (LOC112046848), mRNA	2
BA_RNH2B.1.1	15	974	1661	1661	0.99	0	0.9764	XM_024099313.1	PREDICTED: Bicyclus anynana ribonuclease H2 subunit B (LOC112058460), mRNA	2
BA_LOC725618.1.1	15	765	1288	1288	0.99	0	0.9725	XM_024087991.1	PREDICTED: Bicyclus anynana DNA polymerase V-like (LOC112049927), mRNA	2
BA_DWIL_GK17744.1.2	15	455	684	684	0.87	0	0.9775	XM_024093560.1	PREDICTED: Bicyclus anynana cytochrome b-c1 complex subunit 8-like (LOC112053938), mRNA	2
BA_contig_033159	15	482	876	876	0.99	0	0.9958	XM_024088826.1	PREDICTED: Bicyclus anynana pinin (LOC112050537), mRNA	2
BA_EIF3C.4.5	15	765	1197	1197	0.86	0	0.991	XM_024088083.1	PREDICTED: Bicyclus anynana eukaryotic translation initiation factor 3 subunit C (LOC112049984), mRNA	2
BA_LOC588427.1.1	20	476	811	881	1	0	0.9955	XM_024079037.1	PREDICTED: Bicyclus anynana NFX1-type zinc finger-containing protein 1-like (LOC112043563), mRNA	2
BA_LOC100881889.2.2	21	466	274	274	0.44	2e-69	0.9087	XM_024081341.1	PREDICTED: Bicyclus anynana pre-mRNA-processing factor 6 (LOC112045236), mRNA	2
BA_CCNL1.4.4	22	1110	1932	1932	0.98	0	0.9845	XM_024078542.1	PREDICTED: Bicyclus anynana cyclin-L1 (LOC112043226), mRNA	2
BA_TIM10.1.1	25	802	1408	1408	0.99	0	0.985	XM_024089729.1	PREDICTED: Bicyclus anynana mitochondrial import inner membrane translocase subunit Tim10 (LOC112051194), mRNA	2
BA_contig_110998	35	1030	1716	1716	1	0	96.90^%	XM_024087795.1	PREDICTED: Bicyclus anynana eukaryotic translation initiation factor 4B (LOC112049763), mRNA	2
BA_contig_116772	45	456	121	121	0.23	3e-23	0.8739	XM_024088327.1	PREDICTED: Bicyclus anynana cytochrome P450 4C1-like (LOC112050148), mRNA	2
BA_contig_112098	10	512	62.2	430	0.08	2e-05	0.9091	KX778609.1	Bicyclus anynana clone scaffold467+ genomic sequence	3
BA_contig_113118	10	630	1129	1129	0.98	0	0.9935	XM_024088816.1	PREDICTED: Bicyclus anynana uncharacterized protein PF11_0213-like (LOC112050530), mRNA	3
BA_contig_107705	10	315	56.4	159	0.13	0.0006	0.8864	KX778609.1	Bicyclus anynana clone scaffold467+ genomic sequence	3
BA_contig_103955	10	258	114	283	0.42	2e-21	0.9559	KX778610.1	Bicyclus anynana clone scaffold223+ genomic sequence	3
BA_contig_101669	10	669	1185	1185	0.99	0	0.982	XM_024096949.1	PREDICTED: Bicyclus anynana uncharacterized LOC112056479 (LOC112056479), transcript variant X5, mRNA	3
BA_contig_033263	10	273	406	406	1	2e-109	0.9487	XM_024084713.1	PREDICTED: Bicyclus anynana uncharacterized LOC112047571 (LOC112047571), mRNA	3
BA_contig_033261	10	190	173	216	0.64	2e-39	0.9898	XM_024084355.1	PREDICTED: Bicyclus anynana uncharacterized LOC112047282 (LOC112047282), transcript variant X3, mRNA	3
BA_contig_033249	10	130	154	154	0.82	6e-34	0.9266	XM_024080860.1	PREDICTED: Bicyclus anynana uncharacterized LOC112044873 (LOC112044873), mRNA	3
BA_contig_033247	10	274	100	100	0.23	2e--17	0.9375	XR_002886731.1	PREDICTED: Bicyclus anynana uncharacterized LOC112044244 (LOC112044244), transcript variant X1, ncRNA	3
BA_AAEL_AAEL010540.1.1	10	501	583	883	0.99	2e-162	0.9904	XM_024097433.1	PREDICTED: Bicyclus anynana uncharacterized LOC112056937 (LOC112056937), transcript variant X2, mRNA	3
BA_contig_033228	10	266	50.7	97.5	0.15	0.026	0.8947	KX778609.1	Bicyclus anynana clone scaffold467+ genomic sequence	3
BA_LOC657682.1.5	10	179	285	285	0.82	4e-73	1	XM_024079226.1	PREDICTED: Bicyclus anynana uncharacterized LOC112043704 (LOC112043704), transcript variant X2, mRNA	3
BA_contig_033190	10	397	440	555	0.87	1e-119	0.9709	XM_024084406.1	PREDICTED: Bicyclus anynana uncharacterized LOC112047293 (LOC112047293), mRNA	3
BA_contig_033187	10	182	266	266	0.93	3e-67	0.9765	XM_024091619.1	PREDICTED: Bicyclus anynana uncharacterized LOC112052508 (LOC112052508), mRNA	3
BA_contig_033177	10	309	523	523	1	1e-144	0.9806	XM_024078594.1	PREDICTED: Bicyclus anynana uncharacterized LOC112043274 (LOC112043274), mRNA	3
BA_contig_033175	10	200	294	294	1	6e-76	0.9372	XR_002887150.1	PREDICTED: Bicyclus anynana uncharacterized LOC112050453 (LOC112050453), ncRNA	3
BA_LOC100119593.1.1	10	797	1431	1431	1	0	0.9888	XM_024092975.1	PREDICTED: Bicyclus anynana uncharacterized LOC112053529 (LOC112053529), transcript variant X2, mRNA	3
BA_contig_095916	10	850	1534	1534	0.95	0	0.9951	XM_024086644.1	PREDICTED: Bicyclus anynana uncharacterized LOC112048934 (LOC112048934), mRNA	3
BA_contig_116708	10	741	1258	1258	0.94	0	0.983	XM_024083801.1	PREDICTED: Bicyclus anynana uncharacterized LOC112046942 (LOC112046942), transcript variant X4, mRNA	3
BA_TAN.3.3	10	494	560	560	0.97	2e-155	0.8834	XM_024085247.1	PREDICTED: Bicyclus anynana uncharacterized LOC112047923 (LOC112047923), transcript variant X3, mRNA	3
BA_DVIR_GJ10624.1.1	10	1565	2708	3040	1	0	0.9914	XM_024088412.1	PREDICTED: Bicyclus anynana uncharacterized LOC112050199 (LOC112050199), transcript variant X2, mRNA	3
BA_contig_112684	11	1082	169	486	0.16	2e-37	0.8693	KX778610.1	Bicyclus anynana clone scaffold223+ genomic sequence	3
BA_contig_081034	12	667	67.6	67.6	0.08	6e-07	0.8889	KX778609.1	Bicyclus anynana clone scaffold467+ genomic sequence	3
BA_contig_093258	15	441	392	1913	0.69	5e-105	0.9278	AC239118.1	Bicyclus anynana clone BA_Ba39L19, complete sequence	3
BA_contig_033171	15	177	163	163	0.64	2e-36	0.9224	KX778610.1	Bicyclus anynana clone scaffold223+ genomic sequence	3
BA_LOC762541.25.106	16	517	80.5	80.5	0.15	5e-11	0.8625	KX778610.1	Bicyclus anynana clone scaffold223+ genomic sequence	3
BA_contig_089262	16	519	73.1	73.1	0.11	9e-09	0.8983	KX778609.1	Bicyclus anynana clone scaffold467+ genomic sequence	3
BA_contig_092651	20	345	263	809	0.62	3e-66	0.8972	KX778609.1	Bicyclus anynana clone scaffold467+ genomic sequence	3
BA_contig_118050	21	678	204	4936	0.23	4e-48	90.45$	KX778609.1	Bicyclus anynana clone scaffold467+ genomic sequence	3
BA_contig_115079	25	847	490	4643	0.39	4e+134	0.9464	KX778609.1	Bicyclus anynana clone scaffold467+ genomic sequence	3
BA_contig_081736	25	485	124	124	0.26	2e-24	0.8462	AC239116.1	Bicyclus anynana clone BA_Ba23M04, complete sequence	3
BA_contig_112040	29	523	449	569	0.97	4e-122	0.8986	XM_024084882.1	PREDICTED: Bicyclus anynana uncharacterized LOC112047681 (LOC112047681), mRNA	3
BA_contig_111934	31	519	915	915	0.96	0	0.996	XR_002886987.1	PREDICTED: Bicyclus anynana uncharacterized LOC112047887 (LOC112047887), ncRNA	3
BA_contig_033246	10								No similarity found	4
BA_contig_033182	10								No similarity found	4
BA_contig_089792	10								No similarity found	4
BA_contig_101356	10								No similarity found	4
BA_contig_090815	10								No similarity found	4
BA_contig_092991	12								No similarity found	4
BA_contig_112034	15								No similarity found	4
BA_contig_116968	15								No similarity found	4
BA_contig_033168	15								No similarity found	4
BA_contig_033167	15								No similarity found	4
BA_contig_033164	15								No similarity found	4
BA_contig_033163	15								No similarity found	4
BA_contig_033162	15								No similarity found	4
BA_contig_033160	15								No similarity found	4
BA_contig_033158	15								No similarity found	4
BA_contig_033157	15								No similarity found	4
BA_contig_033155	15								No similarity found	4
BA_contig_095846	15								No similarity found	4
BA_contig_093975	20								No similarity found	4
BA_contig_097697	20								No similarity found	4
BA_contig_102024	20								No similarity found	4
BA_contig_033243	21								No similarity found	4
BA_contig_113992	21								No similarity found	4
BA_contig_090557	25								No similarity found	4
BA_contig_117874	41								No similarity found	4

## Sheet: Overexpr_Lib8-Lib67
#pool1LibNames : RL8_GS8R7LM02	RL8_GS8R7LM03	RL8_GW3I2KR01	RL8_GZKG99Z02	RL8_GZXD38A01	RL8_GZXD38A02
#pool2LibNames : RL6_GS8R7LM02	RL6_GS8R7LM03	RL6_GZKG99Z02	RL6_GZXD38A01	RL6_GZXD38A02	RL7_GS8R7LM02	RL7_GS8R7LM03	RL7_GW3I2KR01	RL7_GZKG99Z02	RL7_GZXD38A01	RL7_GZXD38A02
#total reads pool1 : 31643
#total reads pool2 : 34919
#contigName	countPool1	countPool2	overexp.	p-value	qvalue	length.bp	e.value	blast.identity	blast.sequenceID	blast.name	type
BA_PBP4.2.2	13	1	pool1	0.000614187	0.0112435	698	0	0.91	XM_024088023.1	PREDICTED: Bicyclus anynana general odorant-binding protein 84a (LOC112049951), transcript variant X1, mRNA	1
BA_PBP1.5.6	13	1	pool1	0.000614187	0.0112435	553	0	0.96	XM_024095916.1	PREDICTED: Bicyclus anynana general odorant-binding protein 69a-like (LOC112055726), transcript variant X1, mRNA	1
BA_contig_093846	13	1	pool1	0.000614187	0.0112435	1340	0	0.92	XM_024086729.1	PREDICTED: Bicyclus anynana ejaculatory bulb-specific protein 3-like (LOC112049008), transcript variant X2, mRNA	1
BA_OB10.7.17	15	2	pool1	0.000881738	0.0150838	584	0	0.98	XM_024086728.1	PREDICTED: Bicyclus anynana ejaculatory bulb-specific protein 3-like (LOC112049008), transcript variant X1, mRNA	1
BA_AAEL_AAEL002038.1.1	18	1	pool1	2.07642e-05	0.000545032	632	0	0.97	XM_024086746.1	PREDICTED: Bicyclus anynana ejaculatory bulb-specific protein 3-like (LOC112049019), mRNA	1
BA_CSP10.33.64	18	2	pool1	0.000135828	0.00296848	497	1e-180	0.99	XM_024086742.1	PREDICTED: Bicyclus anynana ejaculatory bulb-specific protein 3-like (LOC112049015), mRNA	1
BA_GSTD2.16.16	18	5	pool1	0.00320007	0.0444694	1087	0	1	XM_024083856.1	PREDICTED: Bicyclus anynana glutathione S-transferase 1-1-like (LOC112046978), transcript variant X1, mRNA	1
BA_contig_110271	19	1	pool1	1.04842e-05	0.000309596	1074	0	0.99	XM_024080794.1	PREDICTED: Bicyclus anynana general odorant-binding protein 1-like (LOC112044820), mRNA	1
BA_AAEL_AAEL006454.1.1	19	1	pool1	1.04842e-05	0.000309596	512	0	0.99	XM_024096816.1	PREDICTED: Bicyclus anynana general odorant-binding protein 72-like (LOC112056392), mRNA	1
BA_CSP4.23.33	22	3	pool1	5.5991e-05	0.00134841	563	0	0.97	XM_024086760.1	PREDICTED: Bicyclus anynana ejaculatory bulb-specific protein 3-like (LOC112049027), mRNA	1
BA_CSP4.24.33	25	7	pool1	0.000566867	0.0104934	561	0	0.97	XM_024086760.1	PREDICTED: Bicyclus anynana ejaculatory bulb-specific protein 3-like (LOC112049027), mRNA	1
BA_CSP7.8.10	28	1	pool1	2.16025e-08	1.09357e-06	632	0	0.95	XM_024086746.1	PREDICTED: Bicyclus anynana ejaculatory bulb-specific protein 3-like (LOC112049019), mRNA	1
BA_JHEH-LP5.62.92	30	4	pool1	9.52879e-07	3.55431e-05	1958	0	0.99	XM_024090856.1	PREDICTED: Bicyclus anynana juvenile hormone epoxide hydrolase-like (LOC112051983), mRNA	1
BA_CSP10.38.64	31	10	pool1	0.000423055	0.0081348	486	0	0.99	XM_024086742.1	PREDICTED: Bicyclus anynana ejaculatory bulb-specific protein 3-like (LOC112049015), mRNA	1
BA_UGT33D5.4.6	32	1	pool1	1.38151e-09	8.35816e-08	2623	0	0.99	XM_024081887.1	PREDICTED: Bicyclus anynana UDP-glucuronosyltransferase 2B20-like (LOC112045621), mRNA	1
BA_GOBP2.39.39	35	1	pool1	1.76773e-10	1.23517e-08	1529	0	0.95	XM_024080793.1	PREDICTED: Bicyclus anynana general odorant-binding protein 2-like (LOC112044819), transcript variant X2, mRNA	1
BA_GOBP1.8.10	37	1	pool1	2.27082e-11	1.7069e-09	1413	0	0.9	XM_024080794.1	PREDICTED: Bicyclus anynana general odorant-binding protein 1-like (LOC112044820), mRNA	1
BA_contig_098780	37	4	pool1	1.17205e-08	6.18568e-07	1054	0	0.99	XM_024078332.1	PREDICTED: Bicyclus anynana juvenile hormone-binding protein-like (LOC112043069), mRNA	1
BA_GSTT7.1.1	38	2	pool1	1.25076e-10	8.86431e-09	1294	0	0.98	XM_024078191.1	PREDICTED: Bicyclus anynana glutathione S-transferase 1-like (LOC112042961), transcript variant X3, mRNA	1
BA_PBP1.2.6	45	1	pool1	7.10431e-14	6.52676e-12	542	0	0.99	XM_024095916.1	PREDICTED: Bicyclus anynana general odorant-binding protein 69a-like (LOC112055726), transcript variant X1, mRNA	1
BA_APP7_1217.2.2	46	9	pool1	3.88395e-08	1.88905e-06	1351	3e-07	0.95	FM955618.1	Bombus terrestris mRNA for acyl-CoA delta-9 desaturase (npve gene)	1
BA_PBP6.3.4	55	3	pool1	1.09085e-14	1.10443e-12	1044	0	1	XM_024090053.1	PREDICTED: Bicyclus anynana general odorant-binding protein 83a-like (LOC112051420), transcript variant X1, mRNA	1
BA_GOBP1.10.10	61	4	pool1	2.16739e-15	2.38943e-13	1823	0	0.9	XM_024080794.1	PREDICTED: Bicyclus anynana general odorant-binding protein 1-like (LOC112044820), mRNA	1
BA_CSP7.4.10	65	2	pool1	6.17081e-19	3.06134e-16	648	0	1	XM_024086746.1	PREDICTED: Bicyclus anynana ejaculatory bulb-specific protein 3-like (LOC112049019), mRNA	1
BA_UD2A3.2.2	69	6	pool1	2.28949e-16	2.989e-14	1643	0	0.99	XM_024093554.1	PREDICTED: Bicyclus anynana UDP-glucuronosyltransferase 2B7-like (LOC112053932), mRNA	1
BA_contig_098774	83	2	pool1	1.49102e-24	1.47939e-21	987	0	0.99	XM_024088023.1	PREDICTED: Bicyclus anynana general odorant-binding protein 84a (LOC112049951), transcript variant X1, mRNA	1
BA_GOBP2.32.39	96	3	pool1	2.15319e-27	3.56065e-24	1577	0	0.97	XM_024080793.1	PREDICTED: Bicyclus anynana general odorant-binding protein 2-like (LOC112044819), transcript variant X2, mRNA	1
BA_OB10.10.17	109	2	pool1	1.11022e-16	4.23678e-14	1522	0	0.98	XM_024086728.1	PREDICTED: Bicyclus anynana ejaculatory bulb-specific protein 3-like (LOC112049008), transcript variant X1, mRNA	1
BA_GOBP2.27.39	132	7	pool1	4.03775e-34	1.00156e-30	1541	0	0.99	XM_024080793.1	PREDICTED: Bicyclus anynana general odorant-binding protein 2-like (LOC112044819), transcript variant X2, mRNA	1
BA_contig_080931	133	37	pool1	5.4165e-16	6.55396e-14	976	0	0.98	XM_024086764.1	PREDICTED: Bicyclus anynana ejaculatory bulb-specific protein 3-like (LOC112049030), mRNA	1
BA_OBP2.24.29	139	5	pool1	1.11022e-16	4.23678e-14	1465	0	0.95	XM_024080793.1	PREDICTED: Bicyclus anynana general odorant-binding protein 2-like (LOC112044819), transcript variant X2, mRNA	1
BA_CSP4.25.33	163	30	pool1	1.19212e-26	1.47853e-23	571	0	1	XM_024086760.1	PREDICTED: Bicyclus anynana ejaculatory bulb-specific protein 3-like (LOC112049027), mRNA	1
BA_GOBP1.5.10	167	7	pool1	9.09352e-45	4.51129e-41	2091	0	0.99	XM_024080794.1	PREDICTED: Bicyclus anynana general odorant-binding protein 1-like (LOC112044820), mRNA	1
BA_DANA_GF18635.3.7	179	9	pool1	1.11022e-16	4.23678e-14	1478	0	1	XM_024090053.1	PREDICTED: Bicyclus anynana general odorant-binding protein 83a-like (LOC112051420), transcript variant X1, mRNA	1
BA_OB10.12.17	251	10	pool1	1.11022e-16	4.23678e-14	2073	0	0.99	XM_024086728.1	PREDICTED: Bicyclus anynana ejaculatory bulb-specific protein 3-like (LOC112049008), transcript variant X1, mRNA	1
BA_PEB3.26.59	255	37	pool1	1.11022e-16	4.23678e-14	1199	0	1	XM_024086742.1	PREDICTED: Bicyclus anynana ejaculatory bulb-specific protein 3-like (LOC112049015), mRNA	1
BA_DERE_GG11380.2.2	11	1	pool1	0.00233025	0.0346119	595	0	0.94	XM_024087328.1	PREDICTED: Bicyclus anynana circadian clock-controlled protein-like (LOC112049452), mRNA	2
BA_LOC100165308.3.4	11	1	pool1	0.00233025	0.0346119	680	0	0.92	XM_024087328.1	PREDICTED: Bicyclus anynana circadian clock-controlled protein-like (LOC112049452), mRNA	2
BA_PGDH.1.1	11	1	pool1	0.00233025	0.0346119	1562	0	0.99	XM_024089939.1	PREDICTED: Bicyclus anynana 15-hydroxyprostaglandin dehydrogenase [NAD(+)]-like (LOC112051339), transcript variant X1, mRNA	2
BA_LOC655201.1.1	11	1	pool1	0.00233025	0.0346119	1734	0	0.99	XM_024078015.1	PREDICTED: Bicyclus anynana circadian clock-controlled protein-like (LOC112042840), mRNA	2
BA_contig_109711	11	1	pool1	0.00233025	0.0346119	810	0	0.93	XM_024079899.1	PREDICTED: Bicyclus anynana circadian clock-controlled protein-like (LOC112044155), mRNA	2
BA_TRY2.6.8	12	1	pool1	0.00119879	0.0190006	854	0	0.96	XM_024098349.1	PREDICTED: Bicyclus anynana transmembrane protease serine 9-like (LOC112057805), mRNA	2
BA_AN-0128.22.75	13	1	pool1	0.000614187	0.0112435	530	0	0.95	XM_024087328.1	PREDICTED: Bicyclus anynana circadian clock-controlled protein-like (LOC112049452), mRNA	2
BA_LOC732963.33.34	13	1	pool1	0.000614187	0.0112435	1315	0	0.99	XM_024087808.1	PREDICTED: Bicyclus anynana alcohol dehydrogenase-like (LOC112049781), mRNA	2
BA_LOC732963.25.34	13	1	pool1	0.000614187	0.0112435	948	0	0.91	XM_024087818.1	PREDICTED: Bicyclus anynana 15-hydroxyprostaglandin dehydrogenase [NAD(+)]-like (LOC112049787), mRNA	2
BA_AAEL_AAEL012440.2.3	13	2	pool1	0.00299412	0.0425612	2030	0	0.98	XM_024085112.1	PREDICTED: Bicyclus anynana ileal sodium/bile acid cotransporter-like (LOC112047846), transcript variant X3, mRNA	2
BA_contig_099543	15	3	pool1	0.00329595	0.04542	1068	5e-153	0.86	XM_024084315.1	PREDICTED: Bicyclus anynana calcyphosin-like protein (LOC112047247), transcript variant X3, mRNA	2
BA_LOC100901452.1.1	15	3	pool1	0.00329595	0.04542	351	1e-79	0.97	XM_024092313.1	PREDICTED: Bicyclus anynana retinal dehydrogenase 1-like (LOC112053045), mRNA	2
BA_contig_098837	15	2	pool1	0.000881738	0.0150838	464	2e-133	0.87	XM_024086285.1	PREDICTED: Bicyclus anynana glycine-rich protein 5-like (LOC112048653), transcript variant X2, mRNA	2
BA_contig_109768	16	2	pool1	0.000474676	0.00898805	1977	0	0.97	XM_024079899.1	PREDICTED: Bicyclus anynana circadian clock-controlled protein-like (LOC112044155), mRNA	2
BA_A1AT.1.4	16	2	pool1	0.000474676	0.00898805	1810	0	0.98	XM_024079360.1	PREDICTED: Bicyclus anynana serine protease inhibitor-like (LOC112043785), mRNA	2
BA_CLVS1.4.5	17	2	pool1	0.000254409	0.00530304	1334	0	0.99	XM_024094822.1	PREDICTED: Bicyclus anynana clavesin-1-like (LOC112054886), transcript variant X3, mRNA	2
BA_DFP11.3.3	17	4	pool1	0.00334936	0.0456489	778	0	0.99	XM_024098985.1	PREDICTED: Bicyclus anynana putative defense protein Hdd11 (LOC112058274), mRNA	2
BA_contig_109596	19	2	pool1	7.22748e-05	0.00170741	664	2e-91	0.86	XM_024087328.1	PREDICTED: Bicyclus anynana circadian clock-controlled protein-like (LOC112049452), mRNA	2
BA_OMBP.9.9	19	3	pool1	0.000330456	0.00661045	2205	0	0.99	XM_024097587.1	PREDICTED: Bicyclus anynana ommochrome-binding protein-like (LOC112057096), mRNA	2
BA_SNAK.1.1	19	2	pool1	7.22748e-05	0.00170741	1842	0	0.99	XM_024080617.1	PREDICTED: Bicyclus anynana trypsin-2-like (LOC112044694), mRNA	2
BA_EAST.6.11	20	6	pool1	0.00283906	0.0407068	2123	0	0.99	XM_024099144.1	PREDICTED: Bicyclus anynana serine protease easter (LOC112058368), mRNA	2
BA_DERE_GG14055.1.1	20	1	pool1	5.28678e-06	0.000165998	1500	6e-174	0.77	XM_013341926.1	PREDICTED: Amyelois transitella GATA zinc finger domain-containing protein 7-like (LOC106140345), partial mRNA	2
BA_contig_099558	20	2	pool1	3.83454e-05	0.000960764	850	8e-81	0.88	XM_024084315.1	PREDICTED: Bicyclus anynana calcyphosin-like protein (LOC112047247), transcript variant X3, mRNA	2
BA_DANA_GF22128.1.1	21	4	pool1	0.000213937	0.00449722	533	0	1	XM_024083368.1	PREDICTED: Bicyclus anynana inducible metalloproteinase inhibitor protein-like (LOC112046658), mRNA	2
BA_SPB3.1.1	22	3	pool1	5.5991e-05	0.00134841	1833	0	0.99	XM_024079354.1	PREDICTED: Bicyclus anynana serine protease inhibitor 77Ba-like (LOC112043780), mRNA	2
BA_BRP-2095.8.8	22	2	pool1	1.07153e-05	0.000309063	1059	0	0.99	XM_024090143.1	PREDICTED: Bicyclus anynana circadian clock-controlled protein-like (LOC112051478), mRNA	2
BA_AN-0128.62.75	23	1	pool1	6.74115e-07	2.6333e-05	739	0	0.93	XM_024087328.1	PREDICTED: Bicyclus anynana circadian clock-controlled protein-like (LOC112049452), mRNA	2
BA_BM1_44325.3.3	24	2	pool1	2.97176e-06	9.76352e-05	494	2e-173	0.97	XM_024087818.1	PREDICTED: Bicyclus anynana 15-hydroxyprostaglandin dehydrogenase [NAD(+)]-like (LOC112049787), mRNA	2
BA_LOC100165308.2.4	24	2	pool1	2.97176e-06	9.76352e-05	763	0	0.95	XM_024087325.1	PREDICTED: Bicyclus anynana circadian clock-controlled protein-like (LOC112049449), mRNA	2
BA_DERE_GG10791.1.1	24	1	pool1	3.38883e-07	1.46191e-05	2458	0	0.99	XM_024080779.1	PREDICTED: Bicyclus anynana nose resistant to fluoxetine protein 6-like (LOC112044811), transcript variant X1, mRNA	2
BA_SCLXB.7.10	26	6	pool1	0.000124158	0.00276209	2488	0	0.98	XM_024087897.1	PREDICTED: Bicyclus anynana scolexin B-like (LOC112049854), transcript variant X1, mRNA	2
BA_DMOJ_GI23926.7.9	26	4	pool1	1.10328e-05	0.000312764	1063	0	0.98	XM_024087325.1	PREDICTED: Bicyclus anynana circadian clock-controlled protein-like (LOC112049449), mRNA	2
BA_DVIR_GJ15220.1.1	26	5	pool1	3.98823e-05	0.000994251	577	0	0.99	XM_024083366.1	PREDICTED: Bicyclus anynana inducible metalloproteinase inhibitor protein-like (LOC112046655), mRNA	2
BA_contig_109801	27	2	pool1	4.29874e-07	1.77717e-05	1504	0	0.97	XM_024091827.1	PREDICTED: Bicyclus anynana phosphatidylethanolamine-binding protein homolog F40A3.3-like (LOC112052655), transcript variant X1, mRNA	2
BA_TY3H.6.8	27	9	pool1	0.00119841	0.0190554	2239	0	0.99	XM_024087728.1	PREDICTED: Bicyclus anynana tyrosine 3-monooxygenase (LOC112049720), mRNA	2
BA_HSP7D.12.12	28	9	pool1	0.000752624	0.0130096	1662	0	0.99	XM_024091819.1	PREDICTED: Bicyclus anynana heat shock 70 kDa protein cognate 4 (LOC112052645), mRNA	2
BA_LOC692889.16.17	28	10	pool1	0.00164524	0.0251915	1676	0	0.99	XM_024080390.1	PREDICTED: Bicyclus anynana aldehyde dehydrogenase X, mitochondrial-like (LOC112044510), transcript variant X1, mRNA	2
BA_LOC732963.22.34	28	2	pool1	2.2527e-07	9.88995e-06	508	0	0.99	XM_024087818.1	PREDICTED: Bicyclus anynana 15-hydroxyprostaglandin dehydrogenase [NAD(+)]-like (LOC112049787), mRNA	2
BA_CTL19.10.12	28	4	pool1	3.26567e-06	0.000105201	1182	0	0.99	XM_024095592.1	PREDICTED: Bicyclus anynana macrophage mannose receptor 1-like (LOC112055464), mRNA	2
BA_LOC661267.2.6	30	3	pool1	1.92784e-07	8.61622e-06	1119	0	0.99	XM_024088004.1	PREDICTED: Bicyclus anynana glucose dehydrogenase [FAD, quinone]-like (LOC112049935), mRNA	2
BA_AN-0128.64.75	30	4	pool1	9.52879e-07	3.55431e-05	1721	0	0.99	XM_024079899.1	PREDICTED: Bicyclus anynana circadian clock-controlled protein-like (LOC112044155), mRNA	2
BA_LOC727010.2.2	30	4	pool1	9.52879e-07	3.55431e-05	653	0	0.96	XM_024087328.1	PREDICTED: Bicyclus anynana circadian clock-controlled protein-like (LOC112049452), mRNA	2
BA_HMGT.1.1	31	12	pool1	0.00188135	0.0287182	1066	0	0.99	XM_024088869.1	PREDICTED: Bicyclus anynana high mobility group B protein 2 (LOC112050577), mRNA	2
BA_TTPAL.4.6	35	1	pool1	1.76773e-10	1.23517e-08	1926	0	0.98	XM_024097341.1	PREDICTED: Bicyclus anynana alpha-tocopherol transfer protein-like (LOC112056856), mRNA	2
BA_AAEL_AAEL007597.2.2	35	7	pool1	2.78486e-06	9.27228e-05	1446	0	0.99	XM_024094166.1	PREDICTED: Bicyclus anynana venom protease-like (LOC112054394), mRNA	2
BA_LOC100865248.238.285	36	6	pool1	4.43231e-07	1.80235e-05	1230	0	0.99	XM_024094154.1	PREDICTED: Bicyclus anynana B1 protein-like (LOC112054383), mRNA	2
BA_TTPAL.3.6	36	1	pool1	8.92219e-11	6.41493e-09	1376	0	0.99	XM_024096201.1	PREDICTED: Bicyclus anynana alpha-tocopherol transfer protein-like (LOC112055904), transcript variant X2, mRNA	2
BA_contig_086746	37	9	pool1	8.91998e-06	0.000266578	2837	0	0.98	XM_024088871.1	PREDICTED: Bicyclus anynana proline-rich receptor-like protein kinase PERK9 (LOC112050579), mRNA	2
BA_contig_092286	38	9	pool1	5.33172e-06	0.000166356	1434	4e-145	0.95	XM_024087325.1	PREDICTED: Bicyclus anynana circadian clock-controlled protein-like (LOC112049449), mRNA	2
BA_EAST.9.11	46	8	pool1	1.12668e-08	6.01018e-07	1669	0	0.99	XM_024099036.1	PREDICTED: Bicyclus anynana serine protease 7-like (LOC112058314), mRNA	2
BA_CPR59.15.15	49	12	pool1	2.12347e-07	9.40585e-06	970	0	0.99	XM_024081659.1	PREDICTED: Bicyclus anynana cuticle protein 19.8-like (LOC112045481), mRNA	2
BA_CCCP.5.7	50	1	pool1	1.90154e-15	2.14399e-13	1440	0	0.91	XM_024087328.1	PREDICTED: Bicyclus anynana circadian clock-controlled protein-like (LOC112049452), mRNA	2
BA_SCLXB.6.10	51	8	pool1	5.89566e-10	3.70233e-08	2458	0	1	XM_024087903.1	PREDICTED: Bicyclus anynana scolexin B-like (LOC112049854), transcript variant X2, mRNA	2
BA_KINX.1.1	68	18	pool1	3.06263e-09	1.7464e-07	1975	0	0.99	XM_024094531.1	PREDICTED: Bicyclus anynana heat shock protein 67B1-like (LOC112054669), mRNA	2
BA_CAPSL.2.4	69	22	pool1	4.305e-08	2.07351e-06	1817	0	0.98	XM_024084298.1	PREDICTED: Bicyclus anynana calcyphosin-like protein (LOC112047247), transcript variant X1, mRNA	2
BA_GST1C.1.2	70	3	pool1	2.22585e-19	1.3803e-16	1073	0	0.99	XM_024078191.1	PREDICTED: Bicyclus anynana glutathione S-transferase 1-like (LOC112042961), transcript variant X3, mRNA	2
BA_LOC662698.1.1	77	5	pool1	1.49627e-19	1.06043e-16	2165	0	0.98	XM_024082527.1	PREDICTED: Bicyclus anynana luciferin 4-monooxygenase-like (LOC112046060), mRNA	2
BA_LOC100746039.1.1	80	10	pool1	3.64194e-16	4.51691e-14	1684	0	0.99	XM_024090277.1	PREDICTED: Bicyclus anynana serine protease gd-like (LOC112051571), mRNA	2
BA_CCCP.4.7	153	14	pool1	1.11022e-16	4.23678e-14	2124	0	0.99	XM_024087325.1	PREDICTED: Bicyclus anynana circadian clock-controlled protein-like (LOC112049449), mRNA	2
BA_DMOJ_GI23926.9.9	157	6	pool1	1.11022e-16	4.23678e-14	1407	0	1	XM_024087328.1	PREDICTED: Bicyclus anynana circadian clock-controlled protein-like (LOC112049452), mRNA	2
BA_AN-0128.63.75	182	6	pool1	1.11022e-16	4.23678e-14	1484	0	0.95	XM_024087328.1	PREDICTED: Bicyclus anynana circadian clock-controlled protein-like (LOC112049452), mRNA	2
BA_TRY2.5.8	222	10	pool1	1.11022e-16	4.23678e-14	1158	0	0.99	XM_024098349.1	PREDICTED: Bicyclus anynana transmembrane protease serine 9-like (LOC112057805), mRNA	2
BA_AN-0128.56.75	227	12	pool1	1.11022e-16	4.23678e-14	1871	0	0.94	XM_024087328.1	PREDICTED: Bicyclus anynana circadian clock-controlled protein-like (LOC112049452), mRNA	2
BA_LOC732963.23.34	412	44	pool1	1.11022e-16	4.23678e-14	1042	0	0.99	XM_024087818.1	REDICTED: Bicyclus anynana 15-hydroxyprostaglandin dehydrogenase [NAD(+)]-like (LOC112049787), mRNA	2
BA_LOC100868866.1.1	11	1	pool1	0.00233025	0.0346119	1072	0	0.99	XM_024084903.1	PREDICTED: Bicyclus anynana phosphatidylinositol-glycan biosynthesis class F protein (LOC112047698), mRNA	2
BA_CP3AL.1.1	11	1	pool1	0.00233025	0.0346119	1679	0	0.99	XM_024082624.1	PREDICTED: Bicyclus anynana cytochrome P450 6k1-like (LOC112046125), mRNA	2
BA_LOC100865369.220.253	11	1	pool1	0.00233025	0.0346119	460	2e-44	1	KU527139.1	Pieris melete 18S ribosomal RNA gene, partial sequence	2
BA_DMOJ_GI16977.1.1	13	2	pool1	0.00299412	0.0425612	6213	0	0.99	XM_024092759.1	PREDICTED: Bicyclus anynana collagen alpha-1(IV) chain (LOC112053362), transcript variant X1, mRNA	2
BA_LC7L3.1.1	13	1	pool1	0.000614187	0.0112435	1106	0	0.99	XM_024088774.1	PREDICTED: Bicyclus anynana luc7-like protein 3 (LOC112050499), transcript variant X2, mRNA	2
BA_LOC100865248.179.285	13	2	pool1	0.00299412	0.0425612	515	2e-135	0.93	AB674749.1	Papilio xuthus genes for 18S rRNA, ITS1, 5.8S rRNA, ITS2, 28S rRNA, complete sequence	2
BA_SERPIN-34.1.2	16	1	pool1	8.10444e-05	0.00188761	1948	0	1	XM_024078689.1	PREDICTED: Bicyclus anynana uncharacterized serine-rich protein C215.13 (LOC112043332), transcript variant X1, mRNA	2
BA_CYP9A20.5.7	17	3	pool1	0.00105581	0.0176956	2369	0	0.99	XM_024093054.1	PREDICTED: Bicyclus anynana cytochrome P450 9e2-like (LOC112053592), mRNA	2
BA_LOC100865248.118.285	17	3	pool1	0.00105581	0.0176956	481	1e-126	0.91	AB674749.1	Papilio xuthus genes for 18S rRNA, ITS1, 5.8S rRNA, ITS2, 28S rRNA, complete sequence	2
BA_LOC100865248.260.285	19	4	pool1	0.00114655	0.0187725	454	3e-132	0.92	AB674749.1	Papilio xuthus genes for 18S rRNA, ITS1, 5.8S rRNA, ITS2, 28S rRNA, complete sequence	2
BA_CYP4M9.3.3	22	1	pool1	1.34031e-06	4.74947e-05	1909	0	0.98	XM_024078237.1	PREDICTED: Bicyclus anynana cytochrome P450 4c3-like (LOC112042998), mRNA	2
BA_AAEL_AAEL005737.2.3	23	2	pool1	5.64753e-06	0.000174021	863	0	0.99	XM_024093218.1	PREDICTED: Bicyclus anynana cytochrome b5-related protein-like (LOC112053711), mRNA	2
BA_CP4C1.4.6	32	3	pool1	5.2313e-08	2.49543e-06	1736	0	0.99	XM_024082468.1	PREDICTED: Bicyclus anynana cytochrome P450 4C1-like (LOC112046024), transcript variant X1, mRNA	2
BA_contig_085686	43	15	pool1	5.52504e-05	0.00134361	440	2e-154	0.92	JX185883.1	Mycalesis gotama 16S ribosomal RNA gene, partial sequence; tRNA-Val gene, complete sequence; and 12S ribosomal RNA gene, partial sequence; mitochondrial	2
BA_CP6B2.2.3	46	2	pool1	4.77864e-13	4.08738e-11	2172	0	0.98	XM_024096293.1	PREDICTED: Bicyclus anynana cytochrome P450 6B2-like (LOC112055978), mRNA	2
BA_LOC100866830.165.199	51	27	pool1	0.00200279	0.0301086	584	0	0.94	JX185883.1	Mycalesis gotama 16S ribosomal RNA gene, partial sequence; tRNA-Val gene, complete sequence; and 12S ribosomal RNA gene, partial sequence; mitochondrial	2
BA_LOC659290.8.8	61	4	pool1	2.16739e-15	2.38943e-13	1754	0	0.99	XM_024093218.1	PREDICTED: Bicyclus anynana cytochrome b5-related protein-like (LOC112053711), mRNA	2
BA_contig_050407	61	25	pool1	1.80788e-05	0.000477068	459	1e-166	0.91	JX185883.1	Mycalesis gotama 16S ribosomal RNA gene, partial sequence; tRNA-Val gene, complete sequence; and 12S ribosomal RNA gene, partial sequence; mitochondrial	2
BA_DPER_28SRRNA_GL28069.21.24	82	42	pool1	4.2486e-05	0.00104343	3363	0	0.94	MF073208.1	Meroptera pravella external transcribed spacer 18S ribosomal RNA gene, internal transcribed spacer 1, 5.8S ribosomal RNA gene, internal transcribes spacer 2 intergenic spacer, and 28S ribosomal RNA gene, complete sequence	2
BA_EF1A.69.80	114	77	pool1	0.000815579	0.0140003	1756	0	1	KM923784.1	Bicyclus anynana translation elongation factor EF-1 alpha subunit mRNA, complete cds	2
BA_LOC100866830.130.199	138	89	pool1	7.85954e-05	0.00183921	620	0	0.96	JX185883.1	Mycalesis gotama 16S ribosomal RNA gene, partial sequence; tRNA-Val gene, complete sequence; and 12S ribosomal RNA gene, partial sequence; mitochondrial	2
BA_contig_109749	196	26	pool1	1.11022e-16	4.23678e-14	1323	5e-05	1	XM_025765493.1	PREDICTED: Arachis hypogaea ATP synthase subunit d, mitochondrial-like (LOC112712571), mRNA	2
BA_contig_080412	200	121	pool1	1.159e-07	5.32388e-06	2538	0	0.99	XR_002887759.1	PREDICTED: Bicyclus anynana small subunit ribosomal RNA (LOC112058131), rRNA	2
BA_LOC100866830.149.199	214	158	pool1	0.000113381	0.0025337	1228	0	0.96	JX185883.1	Mycalesis gotama 16S ribosomal RNA gene, partial sequence; tRNA-Val gene, complete sequence; and 12S ribosomal RNA gene, partial sequence; mitochondrial	2
BA_contig_092653	11	1	pool1	0.00233025	0.0346119	878	1e-103	0.87	KX778610.1	Bicyclus anynana clone scaffold223+ genomic sequence	3
BA_ACE.4.5	12	1	pool1	0.00119879	0.0190006	1900	0	0.96	XM_024088202.1	PREDICTED: Bicyclus anynana uncharacterized LOC112050069 (LOC112050069), mRNA	3
BA_CPIPJ_CPIJ018241.1.1	12	1	pool1	0.00119879	0.0190006	1053	0	0.98	XM_024093329.1	PREDICTED: Bicyclus anynana uncharacterized LOC112053774 (LOC112053774), mRNA	3
BA_AMV148.2.2	13	1	pool1	0.000614187	0.0112435	1110	0	0.98	XM_024094176.1	PREDICTED: Bicyclus anynana uncharacterized LOC112054403 (LOC112054403), mRNA	3
BA_contig_081214	14	1	pool1	0.000313574	0.00640181	965	0	0.97	XM_024088413.1	PREDICTED: Bicyclus anynana uncharacterized LOC112050207 (LOC112050207), mRNA	3
BA_contig_093215	14	2	pool1	0.00162957	0.0251066	1933	0	0.99	XM_024089015.1	PREDICTED: Bicyclus anynana uncharacterized LOC112050694 (LOC112050694), mRNA	3
BA_contig_093816	14	1	pool1	0.000313574	0.00640181	554	0	0.97	XM_024084952.1	PREDICTED: Bicyclus anynana uncharacterized LOC112047733 (LOC112047733), mRNA	3
BA_contig_093639	15	1	pool1	0.000159619	0.00347311	651	5e-171	0.91	XM_024085417.1	PREDICTED: Bicyclus anynana uncharacterized LOC112048061 (LOC112048061), mRNA	3
BA_contig_110210	15	3	pool1	0.00329595	0.04542	974	0	0.99	XM_024095900.1	PREDICTED: Bicyclus anynana uncharacterized protein DDB_G0290685-like (LOC112055713), mRNA	3
BA_contig_104817	15	3	pool1	0.00329595	0.04542	1712	4e-111	0.85	KX778610.1	Bicyclus anynana clone scaffold223+ genomic sequence	3
BA_contig_099716	16	1	pool1	8.10444e-05	0.00188761	498	0	0.99	XM_024094848.1	PREDICTED: Bicyclus anynana uncharacterized LOC112054906 (LOC112054906), mRNA	3
BA_contig_087169	17	2	pool1	0.000254409	0.00530304	1314	0	0.98	XR_002887074.1	PREDICTED: Bicyclus anynana uncharacterized LOC112049251 (LOC112049251), transcript variant X2, misc_RNA	3
BA_contig_086402	17	3	pool1	0.00105581	0.0176956	689	3e-74	0.94	XM_024086769.1	PREDICTED: Bicyclus anynana uncharacterized LOC112049035 (LOC112049035), mRNA	3
BA_PHUM_PHUM361810.2.2	17	4	pool1	0.00334936	0.0456489	1125	0	0.94	XM_024093327.1	PREDICTED: Bicyclus anynana uncharacterized LOC112053773 (LOC112053773), mRNA	3
BA_contig_109303	17	4	pool1	0.00334936	0.0456489	869	0	0.94	KM244676.1	Mycalesis mineus mitochondrion, complete genome	3
BA_contig_093823	17	2	pool1	0.000254409	0.00530304	505	0	97	XM_024084952.1	PREDICTED: Bicyclus anynana uncharacterized LOC112047733 (LOC112047733), mRNA	3
BA_contig_092538	18	1	pool1	2.07642e-05	0.000545032	1111	7e-147	0.96	AC239117.1	Bicyclus anynana clone BA_Ba39A22, complete sequence	3
BA_contig_099560	19	1	pool1	1.04842e-05	0.000309596	934	3e-100	0.91	KX778610.1	Bicyclus anynana clone scaffold223+ genomic sequence	3
BA_contig_093781	19	1	pool1	1.04842e-05	0.000309596	538	0	0.97	XM_024084952.1	PREDICTED: Bicyclus anynana uncharacterized LOC112047733 (LOC112047733), mRNA	3
BA_BGBP.6.8	20	5	pool1	0.00111553	0.0183859	1617	0	0.99	XM_024085175.1	PREDICTED: Bicyclus anynana uncharacterized LOC112047890 (LOC112047890), mRNA	3
BA_contig_104652	22	2	pool1	1.07153e-05	0.000309063	498	2e-129	0.96	XR_002886803.1	PREDICTED: Bicyclus anynana uncharacterized LOC112045347 (LOC112045347), ncRNA	3
BA_PEB3.15.59	22	2	pool1	1.07153e-05	0.000309063	938	0	0.99	XM_024086769.1	PREDICTED: Bicyclus anynana uncharacterized LOC112049035 (LOC112049035), mRNA	3
BA_contig_087194	23	6	pool1	0.00061274	0.0112585	1295	0	1	XM_024081460.1	PREDICTED: Bicyclus anynana uncharacterized LOC112045322 (LOC112045322), mRNA	3
BA_PHUM_PHUM361810.1.2	26	6	pool1	0.000124158	0.00276209	872	0	0.96	XM_024093327.1	PREDICTED: Bicyclus anynana uncharacterized LOC112053773 (LOC112053773), mRNA	3
BA_contig_048554	27	2	pool1	4.29874e-07	1.77717e-05	493	5e-120	0.99	XR_002886803.1	PREDICTED: Bicyclus anynana uncharacterized LOC112045347 (LOC112045347), ncRNA	3
BA_contig_109705	27	4	pool1	6.01401e-06	0.00018417	1316	0.03	1	CU207354.9	Zebrafish DNA sequence from clone DKEY-219E24 in linkage group 11, complete sequence	3
BA_LOC100877573.1.2	28	1	pool1	2.16025e-08	1.09357e-06	1487	0	0.98	XM_024085306.1	PREDICTED: Bicyclus anynana clavesin-1-like (LOC112047979), mRNA	3
BA_CSP11.24.35	28	2	pool1	2.2527e-07	9.88995e-06	490	4e-176	0.97	XM_024086771.1	PREDICTED: Bicyclus anynana uncharacterized LOC112049036 (LOC112049036), mRNA	3
BA_contig_104574	29	3	pool1	3.68741e-07	1.55027e-05	601	1e-147	0.99	XR_002886803.1	PREDICTED: Bicyclus anynana uncharacterized LOC112045347 (LOC112045347), ncRNA	3
BA_OBP5.5.7	30	2	pool1	3.05388e-08	1.51503e-06	1208	0	0.99	XM_024094155.1	PREDICTED: Bicyclus anynana uncharacterized LOC112054384 (LOC112054384), mRNA	3
BA_LOC100866830.133.199	34	12	pool1	0.000328813	0.00660422	323	3e-111	0.92	KM378244.1	Hamadryas epinome voucher epinome cracker mitochondrion, complete genome	3
BA_DERE_GG15987.43.47	35	12	pool1	0.000208493	0.00440143	796	0	0.98	XR_002887501.1	PREDICTED: Bicyclus anynana uncharacterized LOC112055391 (LOC112055391), ncRNA	3
BA_contig_109760	37	2	pool1	2.49814e-10	1.67477e-08	1260	0.027	1	CU207354.9	Zebrafish DNA sequence from clone DKEY-219E24 in linkage group 11, complete sequence	3
BA_LOC100866830.98.199	39	16	pool1	0.000609062	0.0112326	304	3e-105	0.91	KM378244.1	Hamadryas epinome voucher epinome cracker mitochondrion, complete genome	3
BA_LOC100866830.142.199	41	20	pool1	0.00286092	0.0409021	521	7e-169	0.89	KF906486.1	Melanargia asiatica mitochondrion, complete genome	3
BA_LOC100866830.183.199	41	20	pool1	0.00286092	0.0409021	409	6e-94	0.92	KM378244.1	Hamadryas epinome voucher epinome cracker mitochondrion, complete genome	3
BA_LOC100866830.197.199	42	19	pool1	0.00115726	0.0188236	308	7e-102	0.91	KM378244.1	Hamadryas epinome voucher epinome cracker mitochondrion, complete genome	3
BA_LOC100866830.45.199	43	18	pool1	0.000434566	0.00829185	428	2e-99	0.93	KM378244.1	Hamadryas epinome voucher epinome cracker mitochondrion, complete genome	3
BA_LOC100866830.87.199	44	22	pool1	0.00194108	0.0292697	387	3e-106	0.88	KM378244.1	Hamadryas epinome voucher epinome cracker mitochondrion, complete genome	3
BA_LOC100865248.274.285	44	12	pool1	2.72904e-06	9.33707e-05	954	0	0.98	XR_002886778.1	PREDICTED: Bicyclus anynana uncharacterized LOC112044949 (LOC112044949), ncRNA	3
BA_RPS15.11.12	44	2	pool1	1.93112e-12	1.59671e-10	1057	0	0.99	XM_024094226.1	PREDICTED: Bicyclus anynana uncharacterized LOC112054437 (LOC112054437), mRNA	3
BA_LOC100866830.187.199	45	24	pool1	0.00360779	0.0486365	540	4e-171	0.89	KF881046.1	Davidina armandi mitochondrion, complete genome	3
BA_CSP11.34.35	50	2	pool1	2.90886e-14	2.77517e-12	899	0	1	XM_024086771.1	PREDICTED: Bicyclus anynana uncharacterized LOC112049036 (LOC112049036), mRNA	3
BA_contig_104489	61	2	pool1	1.07342e-17	4.4377e-15	444	0	0.99	XR_002886803.1	PREDICTED: Bicyclus anynana uncharacterized LOC112045347 (LOC112045347), ncRNA	3
BA_LOC100866830.153.199	63	38	pool1	0.00362371	0.0487188	393	2e-88	0.92	KM378244.1	Hamadryas epinome voucher epinome cracker mitochondrion, complete genome	3
BA_contig_109734	64	5	pool1	1.10985e-15	1.28045e-13	1409	0.031	1	CU207354.9	Zebrafish DNA sequence from clone DKEY-219E24 in linkage group 11, complete sequence	3
BA_contig_093720	83	5	pool1	1.11025e-16	1.66907e-14	561	0	0.99	XM_024084952.1	PREDICTED: Bicyclus anynana uncharacterized LOC112047733 (LOC112047733), mRNA	3
BA_contig_109260	90	31	pool1	2.39463e-09	1.39762e-07	1072	0.0001	0.97	CU353215.1	Aphanomyces euteiches cDNA	3
BA_AN-0128.72.75	147	6	pool1	1.11022e-16	4.23678e-14	2162	0	0.97	XM_024079868.1	PREDICTED: Bicyclus anynana uncharacterized LOC112044125 (LOC112044125), mRNA	3
BA_contig_115092	241	8	pool1	1.11022e-16	4.23678e-14	1152	2e-123	0.89	AC239117.1	Bicyclus anynana clone BA_Ba39A22, complete sequence	3
BA_AN-0128.69.75	260	8	pool1	1.11022e-16	4.23678e-14	1494	0	0.98	XM_024079868.1	PREDICTED: Bicyclus anynana uncharacterized LOC112044125 (LOC112044125), mRNA	3
BA_contig_049236	12	1	pool1	0.00119879	0.0190006	534				no significant similarity found	4
BA_contig_109729	12	1	pool1	0.00119879	0.0190006	902				no significant similarity found	4
BA_contig_109819	14	1	pool1	0.000313574	0.00640181	490				no significant similarity found	4
BA_contig_099504	14	1	pool1	0.000313574	0.00640181	606				no significant similarity found	4
BA_CPIPJ_CPIJ008243.1.1	15	1	pool1	0.000159619	0.00347311	3350				no significant similarity found	4
BA_contig_085973	29	3	pool1	3.68741e-07	1.55027e-05	1511				no significant similarity found	4
BA_contig_109836	35	7	pool1	2.78486e-06	9.27228e-05	747				no significant similarity found	4
BA_OBP1.13.14	37	2	pool1	2.49814e-10	1.67477e-08	550				no significant similarity found	4
BA_contig_087369	55	2	pool1	8.77608e-16	1.03662e-13	577				no significant similarity found	4
BA_contig_087399	74	2	pool1	9.73351e-22	8.04799e-19	600				no significant similarity found	4
BA_contig_109824	297	39	pool1	1.11022e-16	4.23678e-14	1040				no significant similarity	4

## Sheet: Lib8_only
#contigName	countPool1	length	max score	total score	query cover	e value	ident	accession	blast.name	type
BA_contig_066721	5	533	876	876	1	0	0.9665	XM_024086729.1	PREDICTED: Bicyclus anynana ejaculatory bulb-specific protein 3-like (LOC112049008), transcript variant X2, mRNA	1
BA_PEB3.37.59	5	463	726	726	0.96	0	0.9644	XM_024086742.1	PREDICTED: Bicyclus anynana ejaculatory bulb-specific protein 3-like (LOC112049015), mRNA	1
BA_OBP1.4.14	5	493	741	741	0.92	0	0.9628	XM_024096816.1	PREDICTED: Bicyclus anynana general odorant-binding protein 72-like (LOC112056392), mRNA	1
BA_CSP7.2.10	5	446	704	704	0.9	0	0.9827	XM_024086746.1	PREDICTED: Bicyclus anynana ejaculatory bulb-specific protein 3-like (LOC112049019), mRNA	1
BA_contig_092139	5	550	80.5	80.5	0.12	6e-11	0.8841	KM378664.1	Bicyclus anynana delta-11 desaturase-like protein mRNA, complete cds	1
BA_contig_080103	5	528	65.8	65.8	0.09	2e-06	0.8929	XM_024084153.1	PREDICTED: Bicyclus anynana ejaculatory bulb-specific protein 3-like (LOC112047146), mRNA	1
BA_DANA_GF18635.4.7	5	599	804	804	0.76	0	0.9848	XM_024090053.1	PREDICTED: Bicyclus anynana general odorant-binding protein 83a-like (LOC112051420), transcript variant X1, mRNA	1
BA_CPIPJ_CPIJ008625.1.1	5	1072	472	472	0.24	2e-128	0.9961	XM_024090053.1	PREDICTED: Bicyclus anynana general odorant-binding protein 83a-like (LOC112051420), transcript variant X1, mRNA	1
BA_GOBP2.15.39	5	494	680	733	0.83	0	0.9845	XM_024080793.1	PREDICTED: Bicyclus anynana general odorant-binding protein 2-like (LOC112044819), transcript variant X2, mRNA	1
BA_GOBP2.24.39	5	433	710	710	0.96	0	0.9738	XM_024080793.1	PREDICTED: Bicyclus anynana general odorant-binding protein 2-like (LOC112044819), transcript variant X2, mRNA	1
BA_contig_099493	5	634	396	635	0.63	6e-106	0.9291	XM_024080793.1	PREDICTED: Bicyclus anynana general odorant-binding protein 2-like (LOC112044819), transcript variant X2, mRNA	1
BA_contig_099454	5	982	484	805	0.46	2e-132	0.9786	XM_024080793.1	PREDICTED: Bicyclus anynana general odorant-binding protein 2-like (LOC112044819), transcript variant X2, mRNA	1
BA_contig_081279	5	828	339	339	0.22	1e-88	1	XM_024088013.1	PREDICTED: Bicyclus anynana glutathione S-transferase 1-1 (LOC112049938), mRNA	1
BA_CSP10.17.64	6	382	444	670	0.98	1e-120	0.9919	XM_024086742.1	PREDICTED: Bicyclus anynana ejaculatory bulb-specific protein 3-like (LOC112049015), mRNA	1
BA_LOC100872346.1.4	6	467	488	488	0.58	7e-134	0.9926	XM_024090053.1	PREDICTED: Bicyclus anynana general odorant-binding protein 83a-like (LOC112051420), transcript variant X1, mRNA	1
BA_contig_047568	6	408	231	231	0.31	1e-56	0.9922	XM_024086764.1	PREDICTED: Bicyclus anynana ejaculatory bulb-specific protein 3-like (LOC112049030), mRNA	1
BA_GOBP2.1.39	6	470	608	608	0.73	5e-170	0.9855	XM_024080793.1	PREDICTED: Bicyclus anynana general odorant-binding protein 2-like (LOC112044819), transcript variant X2, mRNA	1
BA_AAEL_AAEL006136.1.2	6	469	261	261	0.33	2e-65	0.9679	XM_024088024.1	PREDICTED: Bicyclus anynana general odorant-binding protein 84a (LOC112049951), transcript variant X2, mRNA	1
BA_contig_047528	6	505	132	132	0.35	1e-26	0.8075	JQ978770.1	Bicyclus anynana fatty-acyl-CoA reductase (FAR1) mRNA, complete cds	1
BA_contig_083572	6	973	1116	1116	1	0	0.88	XM_024087565.1	PREDICTED: Bicyclus anynana probable very-long-chain enoyl-CoA reductase art-1 (LOC112049612), mRNA	1
BA_contig_092142	6	594	196	196	0.25	6e-46	0.9079	XM_024080793.1	PREDICTED: Bicyclus anynana general odorant-binding protein 2-like (LOC112044819), transcript variant X2, mRNA	1
BA_contig_109782	6	535	841	841	0.94	0	0.9722	XM_024080797.1	PREDICTED: Bicyclus anynana pheromone-binding protein-like (LOC112044821), transcript variant X2, mRNA	1
BA_contig_093870	6	725	1027	1027	0.98	0	0.9265	XM_024086729.1	PREDICTED: Bicyclus anynana ejaculatory bulb-specific protein 3-like (LOC112049008), transcript variant X2, mRNA	1
BA_LOC100872346.4.4	6	466	728	728	0.93	0	0.9703	XM_024090053.1	PREDICTED: Bicyclus anynana general odorant-binding protein 83a-like (LOC112051420), transcript variant X1, mRNA	1
BA_GOBP1.9.10	6	924	806	1606	1	0	0.9552	XM_024080794.1	PREDICTED: Bicyclus anynana general odorant-binding protein 1-like (LOC112044820), mRNA	1
BA_OB76A.1.1	6	550	824	824	0.84	0	0.985	XM_024096815.1	PREDICTED: Bicyclus anynana general odorant-binding protein 72 (LOC112056391), mRNA	1
BA_GOBP2.30.39	6	915	699	699	0.42	0	0.9873	XM_024080793.1	PREDICTED: Bicyclus anynana general odorant-binding protein 2-like (LOC112044819), transcript variant X2, mRNA	1
BA_PBP4.1.2	7	532	649	649	0.71	0	0.9738	XM_024088024.1	PREDICTED: Bicyclus anynana general odorant-binding protein 84a (LOC112049951), transcript variant X2, mRNA	1
BA_contig_104309	7	387	69.4	69.4	0.09	9e-08	1	FM879141.1	Bombus lapidarius mRNA for acyl-CoA delta-9 desaturase (npve gene)	1
BA_CPIPJ_CPIJ007604.3.3	7	645	664	840	0.71	0	0.9972	XM_024090061.1	PREDICTED: Bicyclus anynana general odorant-binding protein 83a-like (LOC112051420), transcript variant X2, mRNA	1
BA_GOBP1.7.10	7	609	797	797	0.75	0	0.9825	XM_024080794.1	PREDICTED: Bicyclus anynana general odorant-binding protein 1-like (LOC112044820), mRNA	1
BA_contig_109578	7	656	62.1	62.1	0.05	3e-05	1	FM879141.1	Bombus lapidarius mRNA for acyl-CoA delta-9 desaturase (npve gene)	1
BA_CSP10.64.64	7	631	902	902	0.96	0	0.944	XM_024086742.1	PREDICTED: Bicyclus anynana ejaculatory bulb-specific protein 3-like (LOC112049015), mRNA	1
BA_GST1C.2.2	7	826	1301	1301	0.98	0	0.9522	XM_024078192.1	PREDICTED: Bicyclus anynana glutathione S-transferase 1-like (LOC112042961), transcript variant X4, mRNA	1
BA_UGT33D5.5.6	7	1149	1050	1050	0.53	0	0.977	XM_024081887.1	PREDICTED: Bicyclus anynana UDP-glucuronosyltransferase 2B20-like (LOC112045621), mRNA	1
BA_EST6.2.2	8	2077	3655	3655	0.99	0	0.9874	XM_024098463.1	PREDICTED: Bicyclus anynana venom carboxylesterase-6-like (LOC112057878), mRNA	1
BA_OBP1.8.14	8	1147	902	902	0.46	0	0.9702	XM_024080834.1	PREDICTED: Bicyclus anynana general odorant-binding protein 1-like (LOC112044853), transcript variant X1, mRNA	1
BA_LOC656115.3.4	8	1399	2390	2390	0.99	0	0.9771	XM_024081197.1	PREDICTED: Bicyclus anynana fatty acyl-CoA reductase 1-like (LOC112045116), mRNA	1
BA_PEB3.10.59	8	448	553	787	0.95	2e-153	0.9967	XM_024086742.1	PREDICTED: Bicyclus anynana ejaculatory bulb-specific protein 3-like (LOC112049015), mRNA	1
BA_LOC100872346.2.4	8	397	538	538	0.74	6e-149	0.9933	XM_024090053.1	PREDICTED: Bicyclus anynana general odorant-binding protein 83a-like (LOC112051420), transcript variant X1, mRNA	1
BA_CSP10.23.64	8	465	451	451	0.63	9e-123	0.996	XM_024086742.1	PREDICTED: Bicyclus anynana ejaculatory bulb-specific protein 3-like (LOC112049015), mRNA	1
BA_GOBP2.33.39	8	947	961	961	0.61	0	0.963	XM_024080793.1	PREDICTED: Bicyclus anynana general odorant-binding protein 2-like (LOC112044819), transcript variant X2, mRNA	1
BA_DANA_GF18635.7.7	9	593	867	867	0.81	0	0.9917	XM_024090053.1	PREDICTED: Bicyclus anynana general odorant-binding protein 83a-like (LOC112051420), transcript variant X1, mRNA	1
BA_DANA_GF18635.6.7	9	505	854	854	0.94	0	0.9896	XM_024090061.1	PREDICTED: Bicyclus anynana general odorant-binding protein 83a-like (LOC112051420), transcript variant X2, mRNA	1
BA_GOBP2.28.39	9	1104	793	1136	0.6	0	0.9667	XM_024080793.1	PREDICTED: Bicyclus anynana general odorant-binding protein 2-like (LOC112044819), transcript variant X2, mRNA	1
BA_contig_093827	10	637	830	830	0.92	0	0.9246	XM_024086729.1	PREDICTED: Bicyclus anynana ejaculatory bulb-specific protein 3-like (LOC112049008), transcript variant X2, mRNA	1
BA_DANA_GF18635.5.7	10	538	867	867	0.96	0	0.9712	XM_024090053.1	PREDICTED: Bicyclus anynana general odorant-binding protein 83a-like (LOC112051420), transcript variant X1, mRNA	1
BA_contig_110265	10	1109	1626	1626	0.93	0	0.9515	XM_024080794.1	PREDICTED: Bicyclus anynana general odorant-binding protein 1-like (LOC112044820), mRNA	1
BA_CSP7.5.10	10	632	987	987	0.92	0	0.9759	XM_024086746.1	PREDICTED: Bicyclus anynana ejaculatory bulb-specific protein 3-like (LOC112049019), mRNA	1
BA_AE13.2.3	11	1453	56.5	56.5	0.02	0.003	0.9459	KY849884.1	Holotrichia parallela odorant degrading protein 5 (ODE5) mRNA, complete cds	1
BA_PBP3.8.8	13	954	577	975	0.62	3e-160	0.9608	XM_024080797.1	PREDICTED: Bicyclus anynana pheromone-binding protein-like (LOC112044821), transcript variant X2, mRNA	1
BA_OR83B.1.1	13	1987	2996	2996	0.82	0	0.9951	XM_024086622.1	PREDICTED: Bicyclus anynana odorant receptor coreceptor (LOC112048918), mRNA	1
BA_GOBP2.31.39	13	806	946	946	0.74	0	0.9536	XM_024080793.1	PREDICTED: Bicyclus anynana general odorant-binding protein 2-like (LOC112044819), transcript variant X2, mRNA	1
BA_DVIR_GJ14502.1.1	16	600	859	859	0.92	0	0.9547	XM_024090053.1	PREDICTED: Bicyclus anynana general odorant-binding protein 83a-like (LOC112051420), transcript variant X1, mRNA	1
BA_contig_098743	17	729	767	767	0.7	0	0.938	XM_024088023.1	PREDICTED: Bicyclus anynana general odorant-binding protein 84a (LOC112049951), transcript variant X1, mRNA	1
BA_contig_093834	17	1302	1592	1592	0.9	0	0.9112	XM_024086729.1	PREDICTED: Bicyclus anynana ejaculatory bulb-specific protein 3-like (LOC112049008), transcript variant X2, mRNA	1
BA_GOBP2.35.39	17	1404	374	633	0.27	6e-99	0.9576	XM_024080793.1	PREDICTED: Bicyclus anynana general odorant-binding protein 2-like (LOC112044819), transcript variant X2, mRNA	1
BA_UDB30.1.1	18	2647	3278	3278	0.72	0	0.9723	XM_024084444.1	PREDICTED: Bicyclus anynana UDP-glucuronosyltransferase-like (LOC112047348), transcript variant X1, mRNA	1
BA_SERPIN-11.4.7	23	2374	137	137	0.04	2e-27	0.8803	XM_024079666.1	PREDICTED: Bicyclus anynana acyl-CoA Delta(11) desaturase-like (LOC112043964), transcript variant X4, mRNA	1
BA_PBP3.5.8	23	1014	1674	1674	0.94	0	0.9823	XM_024080796.1	PREDICTED: Bicyclus anynana pheromone-binding protein-like (LOC112044821), transcript variant X1, mRNA	1
BA_PBP3.4.8	34	521	852	852	0.95	0	0.9779	XM_024090053.1	PREDICTED: Bicyclus anynana general odorant-binding protein 83a-like (LOC112051420), transcript variant X1, mRNA	1
BA_AKH3.8.20	5	515	239	239	0.26	9e-59	0.9852	XR_002887019.1	PREDICTED: Bicyclus anynana probable G-protein coupled receptor 158 (LOC112048363), transcript variant X2, misc_RNA	2
BA_contig_000113	5	325	171	171	0.31	2e-38	0.9615	XM_024086762.1	PREDICTED: Bicyclus anynana holotricin-3-like (LOC112049029), mRNA	2
BA_ITIH6.3.3	5	988	1563	1563	0.98	0	0.9581	XM_024099320.1	PREDICTED: Bicyclus anynana inter-alpha-trypsin inhibitor heavy chain H6-like (LOC112058466), mRNA	2
BA_MET1.1.1	5	2277	4034	4034	0.99	0	0.9885	XM_024079041.1	PREDICTED: Bicyclus anynana aryl hydrocarbon receptor nuclear translocator-like protein 1 (LOC112043567), mRNA	2
BA_LOC657950.2.3	5	1567	2176	2176	0.78	0	0.9854	XM_024092022.1	PREDICTED: Bicyclus anynana TATA element modulatory factor (LOC112052798), mRNA	2
BA_contig_115216	5	636	172	172	0.19	1e-38	0.9194	XM_024097393.1	PREDICTED: Bicyclus anynana toll-interacting protein-like (LOC112056908), mRNA	2
BA_contig_098796	5	543	239	239	0.25	9e-59	0.9786	XM_024086284.1	PREDICTED: Bicyclus anynana glycine-rich protein 5-like (LOC112048653), transcript variant X1, mRNA	2
BA_contig_098756	5	582	891	891	0.97	0	0.9515	XM_024094821.1	PREDICTED: Bicyclus anynana clavesin-1-like (LOC112054886), transcript variant X2, mRNA	2
BA_AGAP_AGAP001202.1.2	5	996	865	865	0.48	0	0.9877	XM_024079946.1	PREDICTED: Bicyclus anynana solute carrier family 22 member 6-like (LOC112044192), mRNA	2
BA_AGAP_AGAP010640.2.2	5	1599	1079	2020	0.71	0	0.9611	XM_024086087.1	PREDICTED: Bicyclus anynana perilipin-4-like (LOC112048533), transcript variant X2, mRNA	2
BA_contig_087837	5	1171	2121	2367	0.98	0	1	XM_024095894.1	PREDICTED: Bicyclus anynana keratin, type I cytoskeletal 9-like (LOC112055707), mRNA	2
BA_contig_115165	5	640	69.4	69.4	0.06	2e-07	0.9545	XM_024095852.1	PREDICTED: Bicyclus anynana chymotrypsin-2-like (LOC112055661), partial mRNA	2
BA_AAEL_AAEL011638.1.1	5	1070	1864	1864	1	0	0.9813	XM_024094228.1	PREDICTED: Bicyclus anynana cyclic nucleotide-gated cation channel beta-3-like (LOC112054439), transcript variant X1, mRNA	2
BA_DHB11.1.1	5	3065	3639	3639	0.67	0	0.9859	XM_024096128.1	PREDICTED: Bicyclus anynana estradiol 17-beta-dehydrogenase 11-like (LOC112055852), transcript variant X2, mRNA	2
BA_E96H-0303.4.4	5	448	616	842	1	3e-172	1	XM_024087328.1	PREDICTED: Bicyclus anynana circadian clock-controlled protein-like (LOC112049452), mRNA	2
BA_CPIPJ_CPIJ004233.2.2	5	1527	2699	2699	0.99	0	0.9881	XM_024080754.1	PREDICTED: Bicyclus anynana facilitated trehalose transporter Tret1-like (LOC112044791), mRNA	2
BA_PARG.2.2	5	1260	2117	2117	0.99	0	0.9728	XM_024084817.1	PREDICTED: Bicyclus anynana poly(ADP-ribose) glycohydrolase-like (LOC112047641), transcript variant X2, mRNA	2
BA_SNMP1.7.7	5	891	878	980	0.58	0	1	XM_024098355.1	PREDICTED: Bicyclus anynana indole-3-acetaldehyde oxidase-like (LOC112057810), mRNA	2
BA_MAL1.2.2	5	1277	2152	2152	0.99	0	0.9755	XM_024098378.1	PREDICTED: Bicyclus anynana maltase 2-like (LOC112057827), transcript variant X2, mRNA	2
BA_LOC733125.4.9	5	596	512	896	0.95	5e-141	0.9766	XM_024080617.1	PREDICTED: Bicyclus anynana trypsin-2-like (LOC112044694), mRNA	2
BA_contig_099556	5	1079	139	139	0.09	2e-28	0.9065	XM_024081996.1	PREDICTED: Bicyclus anynana zinc finger protein 64-like (LOC112045710), mRNA	2
BA_CPR.5.5	5	1502	2625	2625	0.97	0	0.9904	XM_024092069.1	PREDICTED: Bicyclus anynana NADPH--cytochrome P450 reductase (LOC112052843), transcript variant X1, mRNA	2
BA_contig_067956	5	413	84.2	84.2	0.12	3e-12	0.9608	XM_024090334.1	PREDICTED: Bicyclus anynana ubiquitin carboxyl-terminal hydrolase 35 (LOC112051311), transcript variant X6, mRNA	2
BA_contig_094658	5	1878	2959	2959	1	0	0.952	XM_024090952.1	PREDICTED: Bicyclus anynana neurogenic locus Notch protein (LOC112052049), transcript variant X2, mRNA	2
BA_CG6499.1.1	5	1481	2564	2564	0.98	0	0.9823	XM_024096581.1	PREDICTED: Bicyclus anynana putative ammonium transporter 3 (LOC112056200), mRNA	2
BA_contig_099494	5	763	207	207	0.21	4e-49	0.9024	XM_024095904.1	PREDICTED: Bicyclus anynana cysteine-rich PDZ-binding protein-like (LOC112055717), mRNA	2
BA_contig_104527	5	1440	255	255	0.18	3e-63	0.8404	XM_024082426.1	PREDICTED: Bicyclus anynana testis-specific serine/threonine-protein kinase 3-like (LOC112045992), mRNA	2
BA_contig_047672	6	464	582	799	0.97	3e-162	1	KU527139.1	Pieris melete 18S ribosomal RNA gene, partial sequence	2
BA_ADHR.1.1	6	867	953	1398	0.92	0	0.9852	XM_024089940.1	PREDICTED: Bicyclus anynana 15-hydroxyprostaglandin dehydrogenase [NAD(+)]-like (LOC112051339), transcript variant X2, mRNA	2
BA_LOC100865248.156.285	6	504	505	505	0.66	8e-139	0.9401	KY128475.1	Nymphalis xanthomelas voucher NX1 5.8S ribosomal RNA gene, partial sequence; ITS2 gene, complete sequence; and 28S ribosomal RNA gene, partial sequence	2
BA_MF-CPA.4.4	6	1620	2891	2891	0.98	0	0.9925	XM_024081348.1	PREDICTED: Bicyclus anynana carboxypeptidase B-like (LOC112045240), transcript variant X2, mRNA	2
BA_contig_083672	6	754	616	866	0.76	5e-172	0.9725	XM_024078995.1	PREDICTED: Bicyclus anynana DNA repair protein XRCC3-like (LOC112043532), mRNA	2
BA_contig_107786	6	664	172	172	0.14	1e-38	0.98	XM_024078366.1	PREDICTED: Bicyclus anynana DNA fragmentation factor subunit alpha-like (LOC112043094), transcript variant X4, mRNA	2
BA_contig_047575	6	376	87.9	87.9	0.12	2e-13	1	XM_024090603.1	PREDICTED: Bicyclus anynana large proline-rich protein BAG6-like (LOC112051807), transcript variant X5, mRNA	2
BA_contig_047566	6	527	76.8	76.8	0.1	7e-10	0.9245	XM_024098375.1	PREDICTED: Bicyclus anynana thioredoxin domain-containing protein 3 homolog (LOC112057824), transcript variant X3, mRNA	2
BA_contig_047565	6	177	220	220	1	9e-54	0.904	XM_024087206.1	PREDICTED: Bicyclus anynana sodium/potassium-transporting ATPase subunit beta-1-like (LOC112049350), mRNA	2
BA_LOC100167190.1.1	6	236	383	383	1	2e-102	0.9585	XM_024098134.1	PREDICTED: Bicyclus anynana GPI mannosyltransferase 2 (LOC112057569), mRNA	2
BA_contig_047556	6	329	137	137	0.31	2e-28	0.9118	XM_024092539.1	PREDICTED: Bicyclus anynana AP-1 complex subunit sigma-2 (LOC112053203), transcript variant X2, mRNA	2
BA_contig_047554	6	376	241	241	0.35	2e-59	0.9925	XM_024079601.1	PREDICTED: Bicyclus anynana multidrug resistance-associated protein 1 (LOC112043925), transcript variant X4, mRNA	2
BA_HSP83.3.4	6	506	431	431	0.55	1e-116	0.9433	XM_024080220.1	PREDICTED: Bicyclus anynana laccase-4-like (LOC112044389), transcript variant X2, mRNA	2
BA_contig_047551	6	417	390	390	0.52	2e-104	0.9908	XM_024087818.1	PREDICTED: Bicyclus anynana 15-hydroxyprostaglandin dehydrogenase [NAD(+)]-like (LOC112049787), mRNA	2
BA_contig_047550	6	503	106	106	0.11	9e-19	1	XM_024085746.1	PREDICTED: Bicyclus anynana sterol regulatory element-binding protein cleavage-activating protein (LOC112048266), mRNA	2
BA_contig_047549	6	523	885	885	1	0	0.9732	XM_024093360.1	PREDICTED: Bicyclus anynana AP-2 complex subunit alpha (LOC112053797), mRNA	2
BA_contig_047548	6	144	161	161	0.64	4e-36	0.9785	XR_002887108.1	PREDICTED: Bicyclus anynana uncharacterized LOC112049733 (LOC112049733), ncRNA	2
BA_LOC100881333.1.1	6	408	754	754	1	0	1	XM_024092769.1	PREDICTED: Bicyclus anynana G-protein coupled receptor 143-like (LOC112053365), mRNA	2
BA_contig_047542	6	494	132	132	0.22	1e-26	0.8829	XM_024081559.1	PREDICTED: Bicyclus anynana zinc finger protein 761-like (LOC112045398), mRNA	2
BA_contig_047539	6	328	494	494	0.98	1e-135	0.9446	XM_024080235.1	PREDICTED: Bicyclus anynana UBX domain-containing protein 6 (LOC112044398), mRNA	2
BA_LOC657813.26.48	6	200	230	818	0.99	2e-56	0.9921	XM_024081244.1	PREDICTED: Bicyclus anynana titin-like (LOC112045155), transcript variant X2, mRNA	2
BA_BRAFLDRAFT_74027.1.1	6	283	459	459	0.94	3e-125	0.9776	XM_024091647.1	PREDICTED: Bicyclus anynana zinc finger protein 260-like (LOC112052529), transcript variant X6, mRNA	2
BA_contig_047530	6	230	73.1	73.1	0.2	4e-09	0.9565	XM_024079766.1	PREDICTED: Bicyclus anynana ankyrin-3-like (LOC112044040), transcript variant X4, mRNA	2
BA_contig_016468	6	377	137	137	0.2	2e-28	0.9872	XM_024078982.1	PREDICTED: Bicyclus anynana serine--tRNA ligase, mitochondrial (LOC112043518), mRNA	2
BA_contig_047529	6	495	497	4643	0.59	1e-136	0.9727	XM_024086925.1	PREDICTED: Bicyclus anynana titin-like (LOC112045155), transcript variant X2, mRNA	2
BA_contig_047527	6	312	130	130	0.36	3e-26	0.8761	XM_024089887.1	PREDICTED: Bicyclus anynana G-protein coupled receptor moody-like (LOC112051301), mRNA	2
BA_BRAFLDRAFT_170708.1.1	6	159	248	248	1	4e-62	0.9497	XM_024084169.1	PREDICTED: Bicyclus anynana zinc finger protein 436-like (LOC112047159), transcript variant X1, mRNA	2
BA_CTBL1.1.1	6	820	846	1252	0.86	0	0.9957	XM_024098186.1	PREDICTED: Bicyclus anynana beta-catenin-like protein 1 (LOC112057680), transcript variant X4, mRNA	2
BA_HOP.1.2	6	483	767	767	1	0	0.9587	XM_024093982.1	PREDICTED: Bicyclus anynana stress-induced-phosphoprotein 1 (LOC112054276), mRNA	2
BA_LOC663450.1.1	6	561	1002	1002	0.99	0	0.9928	XM_024094302.1	PREDICTED: Bicyclus anynana adenylate cyclase type 9 (LOC112054500), transcript variant X2, mRNA	2
BA_PYX.2.3	6	528	942	942	0.99	0	0.9905	XM_024089971.1	PREDICTED: Bicyclus anynana transient receptor potential channel pyrexia (LOC112051367), mRNA	2
BA_LOC732963.5.34	6	444	704	704	1	0	0.955	XM_024087818.1	PREDICTED: Bicyclus anynana 15-hydroxyprostaglandin dehydrogenase [NAD(+)]-like (LOC112049787), mRNA	2
BA_DMOJ_GI16316.1.1	6	1438	2189	2189	0.99	0	0.944	XM_024083932.1	PREDICTED: Bicyclus anynana uncharacterized LOC112047029 (LOC112047029), transcript variant X1, mRNA	2
BA_ZFP9.1.1	6	510	913	913	0.97	0	0.996	XM_024081991.1	PREDICTED: Bicyclus anynana gastrula zinc finger protein XlCGF49.1-like (LOC112045706), mRNA	2
BA_contig_092128	6	418	250	250	0.63	3e-62	0.8351	XM_024079165.1	PREDICTED: Bicyclus anynana lysosomal-trafficking regulator (LOC112043653), mRNA	2
BA_LOC100865248.252.285	6	586	568	568	0.55	1e-157	0.9787	XM_024081662.1	PREDICTED: Bicyclus anynana larval/pupal rigid cuticle protein 66-like (LOC112045483), mRNA	2
BA_contig_115179	6	574	141	141	0.16	3e-29	0.9368	XM_024095511.1	PREDICTED: Bicyclus anynana torsin-1A (LOC112055418), transcript variant X1, mRNA	2
BA_H3C.2.7	6	709	1229	1229	0.99	0	0.973	XM_024096989.1	PREDICTED: Bicyclus anynana histone H3.3 (LOC112056552), transcript variant X2, mRNA	2
BA_CMC2.1.1	6	601	1083	1083	0.98	0	0.9983	XM_024093406.1	PREDICTED: Bicyclus anynana calcium-binding mitochondrial carrier protein SCaMC-2 (LOC112053841), transcript variant X2, mRNA	2
BA_P5CR.1.2	6	1210	2063	2063	0.94	0	0.9905	XM_024079767.1	PREDICTED: Bicyclus anynana pyrroline-5-carboxylate reductase-like (LOC112044042), transcript variant X1, mRNA	2
BA_LSM6.2.3	6	1020	776	776	0.46	0	0.962	XM_024079307.1	PREDICTED: Bicyclus anynana U6 snRNA-associated Sm-like protein LSm6 (LOC112043749), mRNA	2
BA_AAEL_AAEL003354.1.1	6	595	1061	1061	1	0	0.9882	XM_024092709.1	PREDICTED: Bicyclus anynana 2-aminoethanethiol dioxygenase (LOC112053317), mRNA	2
BA_contig_112433	6	278	399	399	0.93	2e-107	0.9432	XM_024086529.1	PREDICTED: Bicyclus anynana innexin inx3 (LOC112048847), mRNA	2
BA_ZCH10.2.3	6	1159	1074	1074	0.67	0	0.9172	XM_024093440.1	PREDICTED: Bicyclus anynana zinc finger CCHC domain-containing protein 10 (LOC112053854), mRNA	2
BA_LOC101165464.6.11	6	288	220	220	0.46	2e-53	0.9568	XM_024094531.1	PREDICTED: Bicyclus anynana heat shock protein 67B1-like (LOC112054669), mRNA	2
BA_contig_109604	6	435	294	294	0.54	2e-75	0.9068	XM_024087328.1	PREDICTED: Bicyclus anynana circadian clock-controlled protein-like (LOC112049452), mRNA	2
BA_contig_057046	6	372	464	464	0.68	9e-127	0.9961	XM_024087818.1	PREDICTED: Bicyclus anynana 15-hydroxyprostaglandin dehydrogenase [NAD(+)]-like (LOC112049787), mRNA	2
BA_NEP-L.3.3	6	1503	2695	2695	0.99	0	0.9907	XM_024085085.1	PREDICTED: Bicyclus anynana neprilysin-2 (LOC112047825), transcript variant X2, mRNA	2
BA_WASH7.2.3	6	1167	2065	2065	1	0	0.9872	XM_024080730.1	PREDICTED: Bicyclus anynana WASH complex subunit 4 (LOC112044776), mRNA	2
BA_SAR1B.2.2	6	1260	2265	2265	0.99	0	0.9944	XM_024078883.1	PREDICTED: Bicyclus anynana GTP-binding protein SAR1b (LOC112043471), mRNA	2
BA_contig_096908	6	749	76.8	76.8	0.06	1e-09	0.9574	XM_024086931.1	PREDICTED: Bicyclus anynana DENN domain-containing protein 1A-like (LOC112049138), transcript variant X4, mRNA	2
BA_contig_109514	6	1216	1602	1602	0.97	0	0.9195	XM_024087328.1	PREDICTED: Bicyclus anynana circadian clock-controlled protein-like (LOC112049452), mRNA	2
BA_contig_090992	6	626	108	108	0.12	3e-19	0.9221	XM_024095835.1	PREDICTED: Bicyclus anynana RILP-like protein homolog (LOC112055642), transcript variant X5, mRNA	2
BA_LOC732963.20.34	6	1229	1971	1971	0.97	0	0.9609	XM_024087810.1	PREDICTED: Bicyclus anynana 15-hydroxyprostaglandin dehydrogenase [NAD(+)]-like (LOC112049784), transcript variant X1, mRNA	2
BA_contig_051616	6	480	84.2	84.2	0.17	4e-12	0.84	XM_024083093.1	PREDICTED: Bicyclus anynana ubiquitin-like modifier-activating enzyme 1 (LOC112046470), mRNA	2
BA_contig_083161	6	595	1038	1038	0.98	0	0.9848	XM_024086605.1	PREDICTED: Bicyclus anynana cytoplasmic dynein 1 light intermediate chain 2 (LOC112048901), mRNA	2
BA_contig_101322	6	429	97.1	97.1	0.13	5e-16	0.9655	XM_024083548.1	PREDICTED: Bicyclus anynana protein unc-13 homolog B-like (LOC112046768), transcript variant X8, mRNA	2
BA_LOC732889.7.8	6	1450	2558	2558	0.96	0	0.995	XM_024086626.1	PREDICTED: Bicyclus anynana alpha-tocopherol transfer protein-like (LOC112048921), mRNA	2
BA_DANA_GF15222.1.1	6	1374	1940	1940	0.89	0	0.9533	XM_024080434.1	PREDICTED: Bicyclus anynana inactive pancreatic lipase-related protein 1-like (LOC112044558), mRNA	2
BA_contig_101982	6	583	957	957	0.97	0	0.9718	XM_024093734.1	PREDICTED: Bicyclus anynana titin-like (LOC112054077), transcript variant X3, mRNA	2
BA_AN-0128.54.75	6	1068	1088	1414	0.78	0	0.9612	XM_024087328.1	PREDICTED: Bicyclus anynana circadian clock-controlled protein-like (LOC112049452), mRNA	2
BA_LOC412236.1.1	6	904	1517	1517	0.96	0	0.9805	XM_024096778.1	PREDICTED: Bicyclus anynana E3 ubiquitin-protein ligase LRSAM1-like (LOC112056357), mRNA	2
BA_contig_013351	6	409	403	403	0.54	2e-108	0.9911	XM_024098709.1	PREDICTED: Bicyclus anynana glycine, alanine and asparagine-rich protein-like (LOC112058038), mRNA	2
BA_SOD2.11.12	6	800	545	545	0.39	7e-151	0.9809	XM_024081806.1	PREDICTED: Bicyclus anynana superoxide dismutase [Mn] 1, mitochondrial (LOC112045571), mRNA	2
BA_contig_100839	6	637	78.7	78.7	0.14	3e-10	0.8333	XM_024092332.1	PREDICTED: Bicyclus anynana protein FAM160B1-like (LOC112053060), mRNA	2
BA_SPZ1.1.3	6	579	1003	1003	0.97	0	0.9893	XM_024078859.1	PREDICTED: Bicyclus anynana protein spaetzle-like (LOC112043453), mRNA	2
BA_ACH1.3.3	6	1551	1003	1003	0.89	0	0.8007	XM_024078169.1	PREDICTED: Bicyclus anynana antichymotrypsin-1-like (LOC112042942), mRNA	2
BA_contig_117623	6	506	518	518	0.56	1e-142	0.992	XM_024092113.1	PREDICTED: Bicyclus anynana gastrula zinc finger protein XlCGF52.1-like (LOC112052879), mRNA	2
BA_contig_050285	7	499	510	510	0.97	2e-140	0.966	XM_024087328.1	PREDICTED: Bicyclus anynana circadian clock-controlled protein-like (LOC112049452), mRNA	2
BA_DPSE_GA10073.1.1	7	705	1118	1118	0.98	0	0.956	XM_024084362.1	PREDICTED: Bicyclus anynana IST1 homolog (LOC112047286), transcript variant X1, mRNA	2
BA_contig_031048	7	139	93.5	93.5	0.4	2e-15	0.9643	XM_024082394.1	PREDICTED: Bicyclus anynana cuticle protein 1-like (LOC112045968), mRNA	2
BA_contig_109746	7	515	52.8	52.8	0.05	0.012	1	CU207354.9	Zebrafish DNA sequence from clone DKEY-219E24 in linkage group 11, complete sequence	2
BA_AAEL_AAEL012310.1.1	7	1687	2942	2942	0.98	0	0.9839	XM_024094132.1	PREDICTED: Bicyclus anynana actin-related protein 3 (LOC112054361), mRNA	2
BA_contig_092087	7	1057	407	407	0.27	5e-109	0.9158	XM_024084051.1	PREDICTED: Bicyclus anynana oocyte zinc finger protein XlCOF6-like (LOC112047122), transcript variant X1, mRNA	2
BA_contig_104810	7	531	278	278	0.3	2e-70	0.9814	XM_024098355.1	PREDICTED: Bicyclus anynana indole-3-acetaldehyde oxidase-like (LOC112057810), mRNA	2
BA_LOC732963.12.34	7	499	680	680	0.74	0	0.9973	XM_024087818.1	PREDICTED: Bicyclus anynana 15-hydroxyprostaglandin dehydrogenase [NAD(+)]-like (LOC112049787), mRNA	2
BA_contig_071914	7	467	669	669	0.81	0	0.9841	XM_024083366.1	PREDICTED: Bicyclus anynana inducible metalloproteinase inhibitor protein-like (LOC112046655), mRNA	2
BA_LOC100644814.1.1	7	1870	3175	3175	0.97	0	0.9798	XM_024082066.1	PREDICTED: Bicyclus anynana esterase B1-like (LOC112045756), mRNA	2
BA_SODC.12.12	7	482	625	696	0.82	5e-175	0.9779	XM_024096835.1	PREDICTED: Bicyclus anynana superoxide dismutase [Cu-Zn]-like (LOC112056405), transcript variant X6, mRNA	2
BA_contig_110613	7	1245	1629	1629	0.87	0	0.9406	XM_024098199.1	PREDICTED: Bicyclus anynana probable peroxisomal membrane protein PEX13 (LOC112057687), mRNA	2
BA_LOC732963.3.34	7	472	634	634	0.72	9e-178	1	XM_024087818.1	PREDICTED: Bicyclus anynana 15-hydroxyprostaglandin dehydrogenase [NAD(+)]-like (LOC112049787), mRNA	2
BA_contig_116470	8	1112	191	191	0.15	6e-44	0.8652	XM_026887639.1	PREDICTED: Trichoplusia ni ribosomal protein S6 kinase alpha-5-like (LOC113505113), mRNA	2
BA_SP16.2.4	8	1536	2651	2651	0.95	0	0.9932	XM_024091678.1	PREDICTED: Bicyclus anynana trypsin 3A1-like (LOC112052552), mRNA	2
BA_contig_094417	8	741	351	351	0.26	2e-92	0.9898	XM_024088244.1	PREDICTED: Bicyclus anynana farnesol dehydrogenase-like (LOC112050093), transcript variant X3, mRNA	2
BA_SEC63.1.1	8	669	1236	1236	1	0	1	XM_024095281.1	PREDICTED: Bicyclus anynana translocation protein SEC63 homolog (LOC112055254), mRNA	2
BA_NACH.1.1	8	695	582	1088	0.85	5e-162	0.9938	XM_024080330.1	PREDICTED: Bicyclus anynana sodium channel protein Nach-like (LOC112044465), mRNA	2
BA_CPIPJ_CPIJ012613.1.1	8	1222	2206	2206	0.99	0	0.9951	XM_024090453.1	PREDICTED: Bicyclus anynana bromodomain adjacent to zinc finger domain protein 2B-like (LOC112051684), mRNA	2
BA_LOC692810.5.7	8	1169	2049	2049	0.98	0	0.9862	XM_024090374.1	PREDICTED: Bicyclus anynana gametogenetin (LOC112051648), transcript variant X2, mRNA	2
BA_CPIPJ_CPIJ002297.1.1	9	2060	3498	3498	0.98	0	0.9765	XM_024090005.1	PREDICTED: Bicyclus anynana facilitated trehalose transporter Tret1-like (LOC112051393), transcript variant X1, mRNA	2
BA_DFP.1.1	9	1032	863	1078	0.58	0	0.9857	XM_024098985.1	PREDICTED: Bicyclus anynana putative defense protein Hdd11 (LOC112058274), mRNA	2
BA_contig_067151	10	550	180	180	0.25	6e-41	0.9007	XM_024081449.1	PREDICTED: Bicyclus anynana NAD kinase-like (LOC112045313), transcript variant X6, mRNA	2
BA_DANA_GF17553.1.1	11	623	887	887	1	0	0.928	XM_024087328.1	PREDICTED: Bicyclus anynana circadian clock-controlled protein-like (LOC112049452), mRNA	2
BA_AN-0128.45.75	11	1172	704	1333	0.64	0	0.9827	XM_024087325.1	PREDICTED: Bicyclus anynana circadian clock-controlled protein-like (LOC112049449), mRNA	2
BA_ALDH2.3.3	13	1903	2021	2021-02-01	0.57	0	1	XM_024082995.1	PREDICTED: Bicyclus anynana aldehyde dehydrogenase, mitochondrial (LOC112046366), mRNA	2
BA_contig_098814	13	477	822	822	0.93	0	1	XM_024086285.1	PREDICTED: Bicyclus anynana glycine-rich protein 5-like (LOC112048653), transcript variant X2, mRNA	2
BA_contig_115652	13	641	704	704	0.92	0	0.8815	KF881051.1	Lethe albolineata mitochondrion, complete genome	2
BA_CPIPJ_CPIJ017472.2.2	15	1888	1871	1871	0.58	0	0.9746	XM_024079865.1	PREDICTED: Bicyclus anynana organic cation transporter protein-like (LOC112044122), mRNA	2
BA_LOC100120526.1.1	16	1306	2108	2108	0.98	0	0.9603	XM_024091363.1	PREDICTED: Bicyclus anynana aldo-keto reductase AKR2E4-like (LOC112052335), mRNA	2
BA_LOC100165308.4.4	16	743	872	872	0.78	0	0.9432	XM_024087328.1	PREDICTED: Bicyclus anynana circadian clock-controlled protein-like (LOC112049452), mRNA	2
BA_SNMP1.4.7	16	2149	1393	2661	0.68	0	0.9813	XM_024098355.1	PREDICTED: Bicyclus anynana indole-3-acetaldehyde oxidase-like (LOC112057810), mRNA	2
BA_LOC100742332.1.1	18	518	793	793	1	0	0.9479	XM_024087328.1	PREDICTED: Bicyclus anynana circadian clock-controlled protein-like (LOC112049452), mRNA	2
BA_DWIL_GK19974.1.1	18	734	876	1062	0.86	0	0.9698	XM_024087328.1	PREDICTED: Bicyclus anynana circadian clock-controlled protein-like (LOC112049452), mRNA	2
BA_PHUM_PHUM154210.2.2	19	2474	3651	3651	0.86	0	0.9761	XM_024086378.1	PREDICTED: Bicyclus anynana ATP-binding cassette sub-family G member 1-like (LOC112048724), mRNA	2
BA_contig_104597	26	1363	1687	1687	0.71	0	0.9815	XM_024091211.1	PREDICTED: Bicyclus anynana serine protease inhibitor dipetalogastin-like (LOC112052212), mRNA	2
BA_ALDO1.2.2	26	2641	4338	4338	0.9	0	0.995	XM_024098355.1	PREDICTED: Bicyclus anynana indole-3-acetaldehyde oxidase-like (LOC112057810), mRNA	2
BA_AL1B1.6.6	33	2050	3217	3217	0.95	0	0.9653	XM_024080380.1	PREDICTED: Bicyclus anynana retinal dehydrogenase 1-like (LOC112044500), mRNA	2
BA_contig_080407	5	1021	339	339	0.18	2e-88	0.9845	XM_024095862.1	PREDICTED: Bicyclus anynana cytochrome P450 4c3-like (LOC112055652), transcript variant X3, mRNA	2
BA_CYP4G14.1.1	5	516	636	636	0.73	3e-178	0.971	XM_024078237.1	PREDICTED: Bicyclus anynana cytochrome P450 4c3-like (LOC112042998), mRNA	2
BA_EF1A.27.80	6	512	872	872	1	0	0.9766	XM_024094001.1	PREDICTED: Bicyclus anynana elongation factor 1-alpha (LOC112054291), transcript variant X3, mRNA	2
BA_contig_047563	6	525	200	200	0.31	4e-47	0.8896	XM_024078863.1	PREDICTED: Bicyclus anynana cytochrome P450 6B4-like (LOC112043456), mRNA	2
BA_contig_047562	6	123	106	106	0.91	2e-19	0.8584	KX930409.1	Bicyclus anynana anynana voucher DL L1029 cytochrome c oxidase subunit I (COI) gene, partial cds; mitochondrial	2
BA_contig_047544	6	235	76.8	76.8	0.18	3e-10	0.9778	XR_002887759.1	PREDICTED: Bicyclus anynana small subunit ribosomal RNA (LOC112058131), rRNA	2
BA_LOC100865369.129.253	6	320	403	403	0.68	2e-108	1	JN800616.1	Papilio polyxenes coloro strain LE207 18S ribosomal RNA gene, partial sequence	2
BA_LOC100575552.57.95	6	533	542	542	0.56	6e-150	0.9901	XR_002887759.1	PREDICTED: Bicyclus anynana small subunit ribosomal RNA (LOC112058131), rRNA	2
BA_RPL3.24.27	6	763	719	719	0.51	0	0.9974	XM_024094004.1	PREDICTED: Bicyclus anynana 60S ribosomal protein L3 (LOC112054293), mRNA	2
BA_contig_007448	6	343	364	438	0.68	9e-97	1	XR_003401612.1	PREDICTED: Trichoplusia ni small subunit ribosomal RNA (LOC113505211), rRNA	2
BA_LOC100866830.194.199	7	408	507	507	0.96	2e-139	0.9035	KM200152.1	Mycalesis anaxias 16S ribosomal RNA gene, partial sequence; mitochondrial	2
BA_LOC100865248.157.285	7	419	357	357	0.53	2e-94	0.9513	AF477533.1	Caloptilia falconipennella 28S ribosomal RNA gene, partial sequence	2
BA_contig_099059	7	380	350	350	0.52	3e-92	0.985	XR_003401612.1	PREDICTED: Trichoplusia ni small subunit ribosomal RNA (LOC113505211), rRNA	2
BA_LOC100575552.74.95	7	462	459	459	0.54	5e-125	0.9922	XR_002887759.1	PREDICTED: Bicyclus anynana small subunit ribosomal RNA (LOC112058131), rRNA	2
BA_LOC100575552.66.95	8	454	584	584	0.73	8e-163	0.9822	XR_002887759.1	PREDICTED: Bicyclus anynana small subunit ribosomal RNA (LOC112058131), rRNA	2
BA_contig_080640	8	580	809	809	0.98	0	0.9273	XR_002887759.1	PREDICTED: Bicyclus anynana small subunit ribosomal RNA (LOC112058131), rRNA	2
BA_LOC100865248.281.285	10	482	521	521	0.7	7e-144	0.944	KY128475.1	Nymphalis xanthomelas voucher NX1 5.8S ribosomal RNA gene, partial sequence; ITS2 gene, complete sequence; and 28S	2
BA_LOC100866830.148.199	11	552	553	553	0.63	3e-153	0.9542	JX185883.1	Mycalesis gotama 16S ribosomal RNA gene, partial sequence; tRNA-Val gene, complete sequence; and 12S ribosomal RNA gene, partial sequence; mitochondrial	2
BA_LOC100865248.242.285	16	884	782	1058	0.65	0	0.9931	MH917708.1	Precis andremiaja 18S ribosomal RNA gene, internal transcribed spacer 1, 5.8S ribosomal RNA gene, internal transcribed spacer 2, and 28S ribosomal RNA gene, complete sequence	2
BA_contig_119108	5	516	115	197	0.17	2e-21	0.9091	KX778610.1	Bicyclus anynana clone scaffold223+ genomic sequence	3
BA_SERPIN-11.6.7	5	710	682	682	0.61	0	0.9467	XM_024093014.1	PREDICTED: Bicyclus anynana uncharacterized LOC112053557 (LOC112053557), mRNA	3
BA_LOC100880726.1.1	5	1332	1999	1999	0.82	0	0.9937	XM_024093068.1	PREDICTED: Bicyclus anynana uncharacterized LOC112053606 (LOC112053606), partial mRNA	3
BA_contig_087218	5	373	351	351	0.54	8e-93	0.9803	XR_002887074.1	PREDICTED: Bicyclus anynana uncharacterized LOC112049251 (LOC112049251), transcript variant X2, misc_RNA	3
BA_contig_092182	5	2012	3539	3539	0.95	0	0.9995	XM_024081201.1	PREDICTED: Bicyclus anynana uncharacterized LOC112045120 (LOC112045120), mRNA	3
BA_contig_093877	5	626	676	676	0.64	0	0.9705	XM_024084952.1	PREDICTED: Bicyclus anynana uncharacterized LOC112047733 (LOC112047733), mRNA	3
BA_AN-0128.70.75	5	902	710	1383	0.89	0	0.9654	XM_024079868.1	PREDICTED: Bicyclus anynana uncharacterized LOC112044125 (LOC112044125), mRNA	3
BA_LOC692945.8.10	6	712	765	765	0.66	0	0.9562	XM_024089917.1	PREDICTED: Bicyclus anynana uncharacterized LOC112051318 (LOC112051318), mRNA	3
BA_contig_115968	6	703	872	872	0.73	0	0.9728	XM_024096170.1	PREDICTED: Bicyclus anynana uncharacterized LOC112055882 (LOC112055882), mRNA	3
BA_contig_047574	6	184	289	289	0.98	3e-74	0.9565	XM_024086506.1	PREDICTED: Bicyclus anynana uncharacterized LOC112048828 (LOC112048828), transcript variant X2, mRNA	3
BA_contig_047573	6	470	603	603	0.72	2e-168	0.9854	KX778609.1	Bicyclus anynana clone scaffold467+ genomic sequence	3
BA_LOC100749128.1.2	6	475	484	484	0.62	9e-133	0.9599	XM_024091004.1	PREDICTED: Bicyclus anynana uncharacterized LOC112052081 (LOC112052081), mRNA	3
BA_contig_047538	6	172	296	296	0.98	1e-76	0.9824	XM_024082913.1	PREDICTED: Bicyclus anynana uncharacterized LOC112046305 (LOC112046305), mRNA	3
BA_contig_047535	6	254	464	464	1	6e-127	0.9961	KX778609.1	Bicyclus anynana clone scaffold467+ genomic sequence	3
BA_contig_047526	6	486	617	617	0.86	9e-173	0.9312	XR_002886902.1	PREDICTED: Bicyclus anynana uncharacterized LOC112046633 (LOC112046633), ncRNA	3
BA_contig_047523	6	144	239	239	0.95	2e-59	0.9784	XM_024096751.1	PREDICTED: Bicyclus anynana uncharacterized LOC112056296 (LOC112056296), transcript variant X7, mRNA	3
BA_LOC100568779.5.9	6	458	483	483	0.69	3e-132	0.9403	KY128475.1	Nymphalis xanthomelas voucher NX1 5.8S ribosomal RNA gene, partial sequence; ITS2 gene, complete sequence; and 28S ribosomal RNA gene, partial sequence	3
BA_contig_088330	6	691	1120	1120	0.93	0	0.9784	XM_024089476.1	PREDICTED: Bicyclus anynana uncharacterized LOC112051015 (LOC112051015), transcript variant X3, mRNA	3
BA_contig_119568	6	681	676	676	0.54	0	0.9946	XM_024080152.1	PREDICTED: Bicyclus anynana putative uncharacterized protein DDB_G0282499 (LOC112044332), mRNA	3
BA_AAEL_AAEL000509.1.1	6	586	989	989	1	0	0.971	XM_024098758.1	PREDICTED: Bicyclus anynana uncharacterized LOC112058081 (LOC112058081), mRNA	3
BA_contig_095981	6	902	1107	1866	0.96	0	0.9856	XR_002887111.1	PREDICTED: Bicyclus anynana uncharacterized LOC112049823 (LOC112049823), ncRNA	3
BA_contig_080064	6	497	339	339	0.43	8e-89	0.9493	XM_024081368.1	PREDICTED: Bicyclus anynana uncharacterized LOC112045256 (LOC112045256), partial mRNA	3
BA_CSP11.29.35	6	479	682	682	0.78	0	0.9947	XM_024086771.1	PREDICTED: Bicyclus anynana uncharacterized LOC112049036 (LOC112049036), mRNA	3
BA_contig_115631	6	1059	1845	1845	0.95	0	0.9941	XM_024087624.1	PREDICTED: Bicyclus anynana uncharacterized LOC112049644 (LOC112049644), transcript variant X5, mRNA	3
BA_CSP11.35.35	6	468	678	678	0.79	0	0.9947	XM_024086771.1	PREDICTED: Bicyclus anynana uncharacterized LOC112049036 (LOC112049036), mRNA	3
BA_CPIPJ_CPIJ001365.1.2	6	682	1007	1007	0.92	0	0.9573	XM_024078255.1	PREDICTED: Bicyclus anynana uncharacterized LOC112043013 (LOC112043013), transcript variant X1, mRNA	3
BA_contig_095117	6	1592	2819	2819	0.99	0	0.9892	XM_024091481.1	PREDICTED: Bicyclus anynana uncharacterized LOC112052419 (LOC112052419), transcript variant X2, mRNA	3
BA_AAEL_AAEL010263.1.2	6	1024	1744	1744	0.98	0	0.9784	XM_024088957.1	PREDICTED: Bicyclus anynana uncharacterized LOC112050650 (LOC112050650), mRNA	3
BA_contig_099468	6	662	289	289	0.23	1e-73	1	XM_024086771.1	PREDICTED: Bicyclus anynana uncharacterized LOC112049036 (LOC112049036), mRNA	3
BA_contig_104468	7	431	612	612	0.9	4e-171	0.9562	XR_002886803.1	PREDICTED: Bicyclus anynana uncharacterized LOC112045347 (LOC112045347), ncRNA	3
BA_contig_056758	7	364	305	467	0.81	6e-79	0.9312	XR_002886803.1	PREDICTED: Bicyclus anynana uncharacterized LOC112045347 (LOC112045347), ncRNA	3
BA_contig_093832	8	528	712	712	0.96	0	0.9277	XM_024084952.1	PREDICTED: Bicyclus anynana uncharacterized LOC112047733 (LOC112047733), mRNA	3
BA_contig_106287	8	836	1456	1456	1	0	0.9821	XM_024094675.1	PREDICTED: Bicyclus anynana putative uncharacterized protein DDB_G0282133 (LOC112054777), mRNA	3
BA_contig_049931	8	464	534	650	0.78	9e-148	0.9932	XR_002886803.1	PREDICTED: Bicyclus anynana uncharacterized LOC112045347 (LOC112045347), ncRNA	3
BA_CSP11.26.35	10	488	632	632	0.76	3e-177	0.9707	XM_024086771.1	PREDICTED: Bicyclus anynana uncharacterized LOC112049036 (LOC112049036), mRNA	3
BA_contig_081215	12	958	1290	1632	0.98	0	0.9786	XM_024088413.1	PREDICTED: Bicyclus anynana uncharacterized LOC112050207 (LOC112050207), mRNA	3
BA_contig_099037	14	999	712	712	0.4	0	0.9828	XM_024096171.1	PREDICTED: Bicyclus anynana uncharacterized LOC112055883 (LOC112055883), mRNA	3
BA_contig_099738	16	635	970	970	0.86	0	0.9837	XM_024094848.1	PREDICTED: Bicyclus anynana uncharacterized LOC112054906 (LOC112054906), mRNA	3
BA_contig_104413	20	426	606	606	0.87	2e-169	0.96	XR_002886803.1	PREDICTED: Bicyclus anynana uncharacterized LOC112045347 (LOC112045347), ncRNA	3
BA_contig_104409	28	500	468	628	0.76	1e-127	0.9527	XR_002886803.1	PREDICTED: Bicyclus anynana uncharacterized LOC112045347 (LOC112045347), ncRNA	3
BA_contig_087373	5								No similarity found	4
BA_LOC660583.1.1	5								No similarity found	4
BA_contig_109790	5								No similarity found	4
BA_contig_109788	5								No similarity found	4
BA_contig_116809	5								No similarity found	4
BA_contig_117826	5								No similarity found	4
BA_contig_100392	5								No similarity found	4
BA_contig_099547	5								No similarity found	4
BA_contig_109306	6								No similarity found	4
BA_contig_114220	6								No similarity found	4
BA_contig_047571	6								No similarity found	4
BA_contig_047570	6								No similarity found	4
BA_ELF1.1.3	6								No similarity found	4
BA_contig_047567	6								No similarity found	4
BA_contig_047561	6								No similarity found	4
BA_contig_047560	6								No similarity found	4
BA_contig_047557	6								No similarity found	4
BA_contig_047555	6								No similarity found	4
BA_contig_047553	6								No similarity found	4
BA_contig_047545	6								No similarity found	4
BA_contig_047541	6								No similarity found	4
BA_contig_047540	6								No similarity found	4
BA_LOC100888978.1.1	6								No similarity found	4
BA_contig_047536	6								No similarity found	4
BA_contig_047534	6								No similarity found	4
BA_contig_047533	6								No similarity found	4
BA_contig_047525	6								No similarity found	4
BA_contig_047524	6								No similarity found	4
BA_contig_047522	6								No similarity found	4
BA_contig_047521	6								No similarity found	4
BA_contig_047520	6								No similarity found	4
BA_contig_047519	6								No similarity found	4
BA_contig_047517	6								No similarity found	4
BA_contig_047516	6								No similarity found	4
BA_contig_109825	6								No similarity found	4
BA_contig_109795	6								No similarity found	4
BA_contig_109744	6								No similarity found	4
BA_contig_080091	6								No similarity found	4
BA_contig_091575	6								No similarity found	4
BA_contig_099513	6								No similarity found	4
BA_contig_090944	6								No similarity found	4
BA_contig_117046	6								No similarity found	4
BA_contig_065042	6								No similarity found	4
BA_contig_087400	7								No similarity found	4
BA_contig_109741	7								No similarity found	4
BA_contig_056400	7								No similarity found	4
BA_contig_025190	8								No similarity found	4
BA_contig_087371	10								No similarity found	4
BA_contig_109777	10								No similarity found	4
BA_contig_109700	10								No similarity found	4
BA_contig_047708	11								No similarity found	4
BA_contig_109800	16								No similarity found	4
BA_contig_087375	18								No similarity found	4
