# Supplementary material for: Mosaic Evolution of Molecular Pathways for Sex Pheromone Communication in a Butterfly
Source: Genes (Basel). 2022 Jul 31;13(8):1372. doi: 10.3390/genes13081372 (PMC9407440; doi:10.3390/genes13081372)
Supplement: Supplementary file 1 [file genes-13-01372-s001.zip › Supplementary Table S3.xlsx]

## Sheet: Supplementary Table S3
contig	new contig name	length	lab coding	unigene annotation	RL1	RL2	RL3	RL4	RL5	RL6	RL7	RL8	Depth	Database	Accession	Species	Description	Evalue	Score	% hit identity	% Query identity	% Query coverage	% Query conserved	% Subject coverage	sequence proteique (l'ORF qui matche en blastP)	sequence nucleique
GW3I2KR01B2RV5.b.ba.1	BA_OR83B.1.1	1987	Orco	Bany_Orco	0	0	0	0	0	0	1	71	0.3	swissprot	OR83B_DROME	Drosophila melanogaster	OR83B_DROME (sp|Q9VNB5) Odorant receptor coreceptor OS=Drosophila melanogaster GN=Orco PE=1 SV=2	0	1583	64	66.1	70.4	79.8	97.9		TTTTCTTTTTCCATATAAGTTTATTTTCGCACACCATGATGAAGGTAGCACAAATAATATTCAAAATTAAAATGCGTATCCCATTCTTTAGGTGTGTTACAAAATTTAGAATAAAAAATTAATAACGTAAATTCAATAAATCTTTTTGGTGATTCAGATTTAATTATATACTACGTATTTATCTGAAAAAAAAATTACAATTTTTTTTTATATTTAACTTTTTTAGGTAGGTAGTTAGTTTAATAAAATAGGTGACACATTTTAAATTTGTGATTGTAAATAATCTAAGTAACTATAAAACTATACAAATAATATTTTACATAATGTAAGTACTTCTTCAGTTACTTCAGCTGCACCAATACCATGAAGTATGTGACCACGGCTCCTAGGACAGATGCA…
GZKG99Z02DT2MR.b.ba.1	BA_OR-35.1.1	1600	PPR 2	Bany_OR1	0	0	0	0	0	0	0	11	0.1	refseq_protein	NP_001103476,1	Bombyx mori	NP_001103476,1 olfactory receptor 35 [Bombyx mori]	1e-110	875	40.1	40.1	77.1	63.3	99.5		TATTTAATGAAATTCTATAGTTTCTCAATCTCCGTTTGATGCATGTCTTGGATAAGCTTAATTCTAGTTCTGTTCTAGTATTCTACACTATGAATATCTAAGCAGCTGTATTACTTGTTTCATCAATATCATCTTGCTGTCTTTGGTCATTATCATCGATTACTTAATTATATCCATAAACACGGTTAAATTAAAGTTTAATGATCTAGACTAGATTTCAAAGCTGTGTAAGCTGAATAAGCTGACCTCAGTATTTTCATTAAGCATTCGTAATTTAAATTAGCCATACCACCAGCTGATAGCATTAGCGTTTTCTGAGATAACACGAGCATTAGTAGAACCGTTTTTTGATTAGATGCGTTAAAGTTCTCCCATTGGCAATCGTATACAGCGAATTCA…
GZXD38A02FY60I.b.ba.1	BA_OR-65.2.2	669	PPR 4	Bany_OR2	0	0	0	0	0	0	0	5	0.1	refseq_protein	NP_001166622,1	Bombyx mori	NP_001166622,1 olfactory receptor 65 [Bombyx mori]	3e-80	629	57.5	57.5	86.5	77.2	80.8		CTGCTCCATCACTATTACCTGATGAGTATGATCAACTTCGACTGCGAAGTGCTGTTCGTCGGTTTGGATGAGAGCGTGGTGCGATTGCCCAAACATGACCCTCGTCGGATGGGTGTGCAAACAATCCTGAACAGCAGGATGAGACGAATTGTTAAATGGCATAATTTGGTTTTTCAGTCTATCGAAGCAGTTTCATCAATCTTCGGACCGCCGATTGTTTACCAAGTAATGTTCAGTTCACTTCTCATTTCTTTGACGGCATATCAAGTAGCTGAATCGTTAGACCACGGCAAATTGAACGTCATGTTTGCAATGCTGGGTATTGCGATGTGTCTTCAGCTCTGGATACCGTGCTACCTCGGAACACTGTTCAGAAACAAGGCATTTTCCGTGGGCGAC…
GZXD38A01B02O1.b.ba.1	BA_OR-14.1.1	464	PPR 6	Bany_OR3	0	0	0	0	0	0	0	3	0.1	refseq_protein	NP_001166602,1	Bombyx mori	NP_001166602,1 olfactory receptor 14 [Bombyx mori]	4e-16	200	33.9	33.9	80.2	52.4	31		CGAAGTTTGGCTCGTAGGCATATTCTTCAACGCAGTGGTGCAGATCGGAATGGCCCTTTGTCAGATTACGAGCAATGCGGAAGCAGACATAAACGCGATGTATTACTTCTACGCAGTAGCCACAGCGGTGCACATCTACGTACCATGCCACCTCGCTTCGGATGTCACTTATCATGCTGCAGAAGTAGCAACTGTAGCATACAGCAGTTCCTGGGAATCTGTACAGGACGCAGGTGTGAAGAGATCAATCGCTATCATCATTGCACGAGCCCAGATCCCAATTAATTTCCAAGCTCTGGGCATGCTGACCTTCAACATGGAAATGTTTGTGTCTATCCTGCAGACGTCATATTCTATGTACACACTCCTGCGAACATAAAATATAAGCACCATTTATAA…
GZKG99Z02DJ0UR.b.ba.1	BA_OR1.1.1	392	NA	Bany_Orco	0	0	0	0	0	0	0	3	0	refseq_rna	NM_001170994,1	Nasonia vitripennis	NM_001170994,1 Nasonia vitripennis odorant receptor 1 (Or1), mRNA	8e-06	29	97	97	8.4		2.3		TTTTCTTTTTCCATATAAGTTTATTTTCGCACACCATGTGATAAAGGTAGTACAAATAATATTCAAAATTAAAATGCGTATCCCATTCTTTAGGTGTGTTACAAAATTTAGAATAAAAAATTAATAACGTAAATTCAATAATTCTTTTTGGTGATTCAGATTTAATTATATACTACGTATTTATCTGAAAAAAAATTTCAAATTTTTTTTANATTTAACTTTTTTAGGTAGGTAGTTAGTTCAATTAAAAATAGGCGACGCATTTTCAATTTCTGATTGTAAATAATCTAAGTAACTATAAAACTTTATAAATAATATTTTGTGTATTTTACATAATGTAAGTTCTTCTTCAGTTACTTCAGCTGCACCAATACCATGAAGTATGTGAACAC
GZKG99Z02DR2Y5.b.ba.1	BA_OR-2.1.1	508	Orco	Bany_Orco	0	0	0	0	0	0	0	2	0	refseq_protein	NP_001037060,1	Bombyx mori	NP_001037060,1 olfactory receptor 2 [Bombyx mori]	1e-51	442	79.2	79.2	60	90.1	21		CCCCCTGATATCCATGTCAACTGGTTCCGGCACCTTCTCTGATACCTCCGTAGAGGAAACTTTAAAACAGTTCAGCAGTATTCGGTCTGTAGGTGTCCAAAGACGCGCTAAGTTCCATCAAAAGGCTTCATGATGGCTTTTCAAGTGTTGGAGCTGTTCCCACGCGTAGATCAGCCAGGAGTGGTAGTCTCGGGACGGGTTCCGTCAGCGTCTCATTAGTCTCCTTGTCCACCAGCATACGCACTGAGTCTCCGAAGAACGTGATTGTTACCCAACACGTAACAGCAAAGATAGTCGTTCCGCAGATGAAGTAGAGGAGCCTCCTCATCTTGGTGAGCGCGAGCTGGTGGTATCTTGAGTCGGACTCCGTGAAGAGAGGATGGCTGTTCGACTGGTTCC…
GZXD38A02GNYNJ.b.ba.1	BA_OR-59.1.1	610	PPR 3	Bany_OR4	0	0	0	0	0	0	0	2	0	refseq_protein	NP_001166611,1	Bombyx mori	NP_001166611,1 olfactory receptor 59 [Bombyx mori]	5e-38	358	42.4	42.4	68.4	69.1	35		TTTTCTTTTTACACTACACGAATAACTCATTTTTAATTCAGATACTTAAGATCTCTGTACCTATATCTAATTTGCTTATACCATTCTTAGAGATACTGGTAATTAAGTATGTAGATAACTTAACAAAACTAACTTAACACAGATTAATTGGATACCTACTACGCTAGATAATAAGATTTATTTTCTATCCAAAATTGTAAACAGTGCGTAAGATGATCTCAAGACAGAAATGTAGGTGTCCAATGACATTGGGATGATGTAGGCGGTGCGGGGCTCGACCGTTCGCTTGCATCTCTCCATCAGCACAAACAGTTGCCGACGGAATGCAGGCGACAGGGACTGCCAGTCCGACTGGTATATGGAGTCGTTCACTAGTTCACTCTCAACTTTAAGGTGTGT…
GW3I2KR01CCMC3.b.ba.1	BA_OR-20.1.1	474		Bany_OR5	0	0	0	0	0	0	1	2	0.1	refseq_protein	NP_001166605,1	Bombyx mori	NP_001166605,1 olfactory receptor 20 [Bombyx mori]	3e-37	348	42.2	42.2	97.5	65.6	38.5	EMAEEKYEDALKVGIQMHAETMWCTSECQIIAGFVYSGQIALNVVVLVMLLLQAMHTERS FGQTCTILSTGVAMLLNTGMLMWNAGNITVEAALLPTAMYSSGWQHCQGMRSRRVRQLLV LAMSQAQRHVVIRSFGIMEVSYQAYVSIVKSSYSAFS	CAGAAATGGCAGAAGAAAAGTACGAAGACGCTCTCAAAGTTGGCATTCAAATGCACGCGGAGACGATGTGGTGCACTTCAGAATGTCAAATCATAGCCGGCTTCGTGTACAGCGGGCAAATCGCATTGAATGTGGTCGTTCTTGTTATGCTGCTGCTACAGGCGATGCACACGGAGCGCTCGTTCGGCCAAACCTGCACCATACTAAGCACGGGCGTGGCAATGCTCCTCAACACCGGCATGCTGATGTGGAACGCGGGCAACATTACCGTCGAGGCAGCTCTTCTGCCCACCGCCATGTACAGTTCTGGTTGGCAGCATTGCCAGGGCATGAGATCACGGAGGGTGCGACAGCTTCTGGTCTTGGCCATGTCACAAGCTCAGAGGCATGTCGTCATAC…
GZXD38A01BY2QL.b.ba.1	BA_DANA_GF17712.1.1	372	Orco	Bany_Orco	0	0	0	0	0	0	0	2	0	refseq_rna	XM_001953308,1	Drosophila ananassae	XM_001953308,1 Drosophila ananassae GF17712 (DanaGF17712), mRNA	2e-18	50	86	86	30.6		7.9		TTTTCTTTTTATGTAGGTGGGTAGTTACTAGTAGTTCATTAAATAGGCGACGCATTTTCAATTTGTGATTGTAAATAATCTAAGTAACTATAAAACTTTATAAATAATATTTTGTGTATTTTACATAATGTAAGTACTTCTTCAGTTACTTCAGCTGCACCAATACCATGAAGTATGTGACCACAGCTCCTAGGACAGATGCAAACAAATCCAATGAGACGGTGAAGAACTTGGCGCCGGAAATGCTCATAGCCTTCTGATTCTATCAATTCGCAAGGACTTCTAATTATATTTTAATTGTTATATGTTATAAATGTTAATTAATATTTTCAGTTTCCATGCATTTCTATCATTAATTCATTATGAATTATT
GE734217.b.ba.1	BA_GR9.1.1	523	PPR 1		0	0	0	0	0	0	0	1	0	refseq_protein	NP_001124345,1	Bombyx mori	NP_001124345,1 gustatory receptor 9 [Bombyx mori]	4e-66	548	74.3	74.3	78	87.5	30.3		TATCGGCAACAGTTACGGCCTGCCACTGATAGTGATCCTCATATCAACGCTGCTGCACTTGATTGTGACGCCGTACTTCTTGATTATGGAGATAATCGTATCAGCACAACGTATACACTTCCTTGTGCTGCAGTTTATGTGGTGTGTCACTCACATCTTACGGATGTTCGTGGTGGTGGAGCCCTGCCATTACACCATCACCGAAGGGAAAAGAACTGAGGGGCTGGTTTGTCGCTTGATGACGTCAACGCCATCTACCGGCATGCTGCCGTCGCGTCTGGAGCTGTTCTCGAGACAACTGATGCTGCAATCCGTCGGCTACACTCCAATGGGAATGTGCACCTTGGACCGACCGCTTGTAGCCTCTGTCCTGGGTGCAGTGACCACTTATTTAGTAAT…
GZXD38A02F1FTW.b.ba.1	BA_OR49.1.1	282	NA	Bany_OR6	0	0	0	0	0	0	0	1	0	refseq_protein	NP_001159623,1	Bombyx mori	NP_001159623,1 olfactory receptor-like [Bombyx mori]	7e-40	359	81.9	81.9	88.3	89.2	20.2	YGRVLMFCFLGQQVDNECEKLEKAVTEKWYIFSSQHRVNVRIFEMAVSQRMPIYIFGSIA LSLPTFTWFIKTGMSFFTLVMSVLNE-LNDY-I	TTACGGCCGGGTATTAATGTTTTGTTTTCTGGGTCAGCAAGTCGACAACGAGTGTGAAAAATTAGAAAAGGCTGTCACAGAGAAATGGTATATCTTCAGCAGCCAGCACCGGGTGAATGTCCGGATATTCGAGATGGCGGTGAGTCAGAGGATGCCCATATACATTTTTGGCTCGATCGCTTTATCTCTGCCGACGTTCACTTGGTTTATCAAGACAGGGATGTCCTTCTTCACGTTAGTGATGTCAGTTTTAAACGAATAATTAAATGATTATTAAATAGT
GZXD38A02I39ST.b.ba.1	BA_OR-44.2.2	286	NA	Bany_OR7	0	0	0	0	0	0	0	1	0	refseq_protein	NP_001166607,1	Bombyx mori	NP_001166607,1 olfactory receptor 44 [Bombyx mori]	3e-37	337	76.5	76.5	85	87.7	25.1	LFVRVC--RYSILCWFGNELILKSLELRQAAFDGPWLETDPKTTMFIVILLERCKRPLRV TAGKIFTLSLNTYTYLINWSYKAFAVMRNTKK-WN	TTTATTTGTACGTGTATGCTGATAGAGGTATTCTATATTGTGCTGGTTCGGCAACGAACTTATATTGAAGAGCCTCGAGCTACGGCAGGCTGCGTTCGATGGACCGTGGCTTGAAACTGACCCGAAGACGACGATGTTCATCGTAATACTGTTGGAACGTTGCAAACGACCCCTGAGGGTCACTGCGGGGAAAATATTCACGTTATCCCTGAACACGTATACTTATCTCATAAACTGGTCGTACAAAGCATTTGCAGTGATGAGAAATACGAAAAAATAATGGAAT
GZXD38A02JNYB4.b.ba.1	BA_BMOR-9.1.1	404	NA	Bany_OR8	0	0	0	0	0	0	0	1	0	refseq_protein	NP_001116817,1	Bombyx mori	NP_001116817,1 olfactory receptor-like [Bombyx mori]	3e-37	348	49.2	49.2	92.1	75	27.7	FTLFMLINLLVSLIVHLFSEWIDIMTSLDIMADGLPIAAAVFIVSYFGMYKTEMYELVEY MNCNFKWHSARGLSNMAMTKAYRTAKNFCCFYTACTIFSVAMYLILPVILHLLTNQPLQH WIYTDVTNDMILIL	CTTCACATTGTTCATGTTGATCAACTTGTTGGTGTCTTTGATAGTACATTTGTTTAGCGAATGGATTGATATCATGACCAGTCTAGATATAATGGCCGATGGATTACCAATAGCCGCTGCAGTTTTCATTGTTTCTTATTTTGGAATGTACAAAACGGAGATGTACGAATTGGTGGAATACATGAATTGTAACTTCAAATGGCACTCTGCTAGAGGGCTGTCTAATATGGCAATGACGAAAGCTTACAGGACAGCGAAAAATTTTTGCTGTTTCTACACCGCATGCACCATCTTTAGTGTTGCTATGTACTTGATCTTGCCAGTTATTCTTCATTTGTTGACAAATCAACCACTCCAACATTGGATATACACGGATGTAACTAACGATATGATATTGAT…
GZXD38A02GZB4H.b.ba.1	BA_OR-44.1.2	236	NA	Bany_OR7	0	0	0	0	0	0	0	1	0	refseq_protein	NP_001166607,1	Bombyx mori	NP_001166607,1 olfactory receptor 44 [Bombyx mori]	8e-19	209	60.3	60.3	99.2	67.9	23.5	IKTARFVMTYYSAMCVGAVSVDN-FCRSTVKFRHTT-QMWNYPYFDVNKSSVYAIIYLHQ IYYKPATCIIDGVMDTILXX	CAAGTATTGTGTCCATTACTCCATCTATAATACAGGTCGCTGGCTTGTAATATATTTGATGCAAATAGATAATGGCATAGACCGACGATTTGTTAACATCAAAATAAGGGTAGTTCCACATTTGTTAGGTAGTATGACGAAATTTTACGGTTGAGCGGCAAAATTAATTGTCAACCGAGACTGCGCCGACACACATAGCAGAATAGTACGTCATTACGAAGCGCGCCGTTTTAATT
GZXD38A01DJHR2.b.ba.1	BA_OR-63.1.1	462	NA	Bany_OR9	0	0	0	0	0	0	0	1	0	refseq_protein	NP_001166620,1	Bombyx mori	NP_001166620,1 olfactory receptor 63 [Bombyx mori]	2e-14	187	70.4	70.4	35.1	87	13.8	ACSVPVRRSVIILMRRCRRVSKLTVGGFTTLSLASFMAILKTSYSMFTLLQQVDSRN-AI PPETHTIFFTFRKRKV-KSNSRLFTYSTNSTAPDRTSMSNLKYYVNV-LYTLGL--HPRG VD-SNIVITGVHMLRRSTHVHIIKY--AYITKRKXX	TTTTCTTTTTGTGATATATGCTCATTAATATTTAATAATGTGTACATGTGTGGATCTACGTAACATGTGGACACCAGTAATTACAATATTACTCTAATCAACACCTCGAGGGTGTCATTACAACCCTAAGGTATATAATTATACATTGACATAATATTTTAAATTAGACATTGACGTTCTGTCTGGCGCTGTCGAGTTGGTGCTGTATGTGAAAAGTCTTGAGTTTGATTTCTATACTTTCCTCTTACGGAAGGTGAAGAAAATCGTGTGTGTTTCAGGCGGTATTGCTTAATTTCTAGAATCGACTTGTTGTAGCAGCGTGAACATGGAGTACGATGTTTTTAATATAGCCATGAAAGAAGCTAAAGATAGCGTGGTGAAGCCGCCAACAGTGAGCTT…
GZKG99Z02DLKUJ.b.ba.1	BA_OR-65.1.2	371	PPR 4	Bany_OR2	0	0	0	0	0	0	0	1	0	refseq_protein	NP_001166622,1	Bombyx mori	NP_001166622,1 olfactory receptor 65 [Bombyx mori]	7e-11	156	43.8	43.8	59	61.6	29.7		TTTTCTTTTTCTTATTTCAATGTACTTTATTTATTTTATGTTTTATTGTTACCCGTATATTGGCGCAGTAAGGTGAAGTACGAATAAGATGTACTCATTATCGAGGAGAAAGTCTCGAGCTCCAGGTTGGGCAGCCCCGTGAACTTGATGCTGACAGGGTAGTTGGGAGCGCATGATGACCAGCGTGATGTCTGCGCGCAGCAGCCGGCCAGCGGCGTCTCGTGCCAACCGCTGCTCCACATGGCGTCGCCCACGGAAAATGCCTGCCAGGTATTTTTTATTAATGGCAAGTTAGTCCTTGACTGCGATCATACCTTACGTAAAGTGACGATGCAGTCTACGATGGAAATGGACTTTCAATTCCATTACTT
GW3I2KR01CM3RB.b.ba.1	BA_OR-41.2.2	234	NA	Bany_OR10	0	0	0	0	0	0	0	1	0	refseq_protein	NP_001091787,1	Bombyx mori	NP_001091787,1 olfactory receptor 41 [Bombyx mori]	2e-09	142	63.2	63.2	49	81.6	10	LRPGIPL-FTQQTCSIL-IFRLYYETEPSSVQFYSMLNYMATMLSQLFLYCWCGSELTTK SQDLRE-AVPVAVVRARR	TTACGGCCGGGGATTCCTCTTTGATTCACACAACAGACTTGTAGTATCTTGTAAATATTCCGTTTATATTATGAGACAGAGCCGAGCAGCGTCCAGTTCTACTCCATGTTGAACTACATGGCAACCATGCTGTCACAGTTGTTCCTATATTGCTGGTGTGGAAGTGAGCTCACTACTAAGAGCCAAGATTTACGAGAATAGGCTGTACCAGTCGCCGTGGTACGAGCAAGACGT
GZXD38A02JL8NO.b.ba.1	BA_OR7.1.1	123	unknown	Bany_Orco	0	0	0	0	0	0	0	1	0	swissprot	OR7_ANOGA	Anopheles gambiae	OR7_ANOGA (sp|Q7QCC7) Gustatory and odorant receptor 7 OS=Anopheles gambiae GN=GPRor7 PE=2 SV=3	7e-08	115	78.6	78.6	68.3	89.3	5.9		GCACGTTCAGCTATCAAGTTATTTGGGTTTGAAAGGCTACAAACATATTGTGAGATTAGTATCTTCTATAGGAGATACATATGGGACGGCTCTATTATTTCACATGCTGGTGTCTACTATTAC
GZXD38A02HPURA.b.ba.1	BA_OR-19.1.1	328	NA	Bany_OR11	0	0	0	0	0	0	0	1	0	refseq_protein	NP_001091785,1	Bombyx mori	NP_001091785,1 olfactory receptor 19 [Bombyx mori]	2e-06	124	45.5	45.5	40.2	72.7	11	EYLQRDALLWLPGSSTSYSYRWNAGNITVEAALLPTAMYSSGWQHCQGMRSRRVRQLLVL AMSTSSDRRNHSLFCYSLILY-RKETNKSLL-SVPII--NLVIHSTYTN	ATTTGTGTAGGTACTATGGATTACTAGGTTTTACTATATTATAGGTACAGATTAGAGTAAACTTTTATTTGTCTCTTTTCTTTAGTATAAAATTAGAGAATAGCAGAATAAGGAGTGATTTCTACGATCTGAGCTTGTTGACATGGCCAAGACCAGAAGCTGTCGCACCCTCCGTGATCTCATGCCCTGGCAATGCTGCCAACCAGAACTGTACATGGCGGTGGGCAGGAGAGCTGCCTCGACGGTAATGTTGCCCGCGTTCCACCTGTACGAATAGCTTGTACTACTCCCTGGTAGCCATAAGAGAGCATCGCGCTGCAAATATTCA
GZXD38A01BZERM.b.ba.1	BA_OR-29.1.1	404	NA	Bany_OR12	0	0	0	0	0	0	0	1	0	refseq_protein	NP_001166894,1	Bombyx mori	NP_001166894,1 olfactory receptor 29 [Bombyx mori]	2e-06	107	40.8	40.8	37	65.3	12	Il y a 2 ORF qui matchent, BA_OR-29.1.1.B partie Nterm et BA_OR-29.1.1.B partie Cterm, cf. fichier word additional OR	TTTTCTTTTTAGTAGTTACGTAGATATATTATTAATTATAAATTATCATCGTAATATAAATATTATTTCGACGTCTGTCTTAAAACAGCGTAGTAGCTATAAGCGGCACGTATGATCTGGATAAATGACGGCAAGTCCAAGGAGTTGAAAGGCCCGGCGAGCATCCTGCTTGGTCGAGACATGCCGAGGCATAGCATTGCTATCTCGCGACGTATCTTCGGCTGAGGCACCAGCTGGCTGAGCAAAACGGCCCTTCTCCTAAGCTCACGAAACTATCCGTAAAGACTGCGTCCCCGTATTGACAGAAGAGGAAAAGTTGCATGAGGGTCGCTCCCATGTACTGCACAGCGATATTATCTGCGCAGCACTCAAATGTTCCGACTTGAGCTGCATAGCGAT…
GZXD38A01EANS1.b.ba.1	BA_contig_055596	466	PPR 2	Bany_OR1	0	0	0	0	0	0	0	1	0													CGGCCGGGGGATACCGATGGCGACTGTTGACTCGATCGTGGGACGTGTTTCCAAACATTCTGTAGTTTTCCAATACACTAATTTACTGATTTTGGAGTTGCAGGGCATCTGATAGCTACTCCAATAAACATGGCGCTGAAGGAGATGTGGGCAACTCTCCAAACGTTCCGAGTGGAAGAAGACAGCTTCCCAATGATGATAGAAAACGTCGCCCTGTTGCTGCGAACGATGATCAATAAATATCTTCAATCATAATAAATACGAGATGTACTGGTTCTACTACGTGGTGACGTTCATCTCCGGGGTCTGCTACTGCTACGTGTTCATAATCTCCATGCTGTGGATGGTGTTCGTGCGATATCGGAAGACCAAAGAACTACACAGCAATGGCCACCGCCG…
GZXD38A01CQZ5I.b.ba.1	BA_contig_059247	124	PPR 2	Bany_OR1	0	0	0	0	0	0	0	1	0													TTTTCTTTTTATTACATATAATTTCTTTGTCAAATTTCGTGCAAATCGTGATTCAGGTACTACTTTAGAATCGCTTTCTAAATATCTTTGTAACATTCCATGTAACTTATCTCTATAAAAAAAA
GZXD38A02GO9NU.b.ba.1	BA_contig_065517	477	PPR 7 (or 6)	Bany_OR13	0	0	0	0	0	0	0	1	0													TTTTCTTTTTATTATATAAAGCGTTTATTTAAAATAATTATTACAGTAGCTGACTAAAACGATATACGTAATCTCATTGGCCAAGGGGCGGTGCTGACAACTACAATACCAGTGCTACAAAATATTAATTAGTAGGTAACTAATACAATTTATCTAGAAATAAGCGTAAAGAAAGAGTAGGCGGTTTGTAAGACAGAGATGAAGAGCTGCATGTTGAAATAAACAATGCCATTCCCAGAAAGTATAAGTGTTTGTTGAGATTTTGCGATCATGAAAATTAATAGCTTAGTCACTGAAGGATCTGCCCATGTCTCCCAGGGGACGTCGTAAATATCCCAGCTCAAATCTTCGCTTACCTTTATCAAGTTGCATGTAAATAACACGGCGCGAACATGTGAT…
GW3I2KR01EWGCJ.b.ba.1	BA_DSIM_GD19619.1.1	385	Orco	Bany_Orco	0	0	0	0	0	0	1	0	0	refseq_rna	XM_002102178,1	Drosophila simulans	XM_002102178,1 Drosophila simulans GD19619 (DsimGD19619), mRNA	1e-29	69	84.5	84.9	49.9		26.8		TTTTTCTTTTTCCATATAAGTTTATTTTCGCACACCATGATGAAGGTAGCACAAATAATATTCAAAATTAAAATGCGTATCCCATTCTTTAGGTGTGTTACAAAATTTTAGAATAAAAAATTAATAACGTAAATTCAATAAAATCTTTTTGGTGATTCAGATTTAATTATATACTACGTATTTATTTCTTCAGTTACTTCAGCTGCACCAATACCGTGAAGTATGTGACCACGGCTCCTAGGACAGATGCAACAAATCCAATGAGACGGTGAAGAACTTGGCGCCAGAAATGCTCATAGCCTTCTGACACTGCTGGCAGACAATCTGCACGAAGGTCTTCGCCTCTTCGGAGCCATCGTACCACTGGCAGGAGTACGCTGCCTCC
GZKG99Z02C2UL5.b.ba.1	BA_OR-41.1.2	391		Bany_OR10	0	1	0	0	0	0	0	0	0	refseq_protein	NP_001091787,1	Bombyx mori	NP_001091787,1 olfactory receptor 41 [Bombyx mori]	1e-18	216	49.4	49.4	65.2	70.6	21.7	LRPGEYQ-TKVYNLAHSFHCEKQKMALSSIDIFLSRPRNVLVFLGIWLPPKRYALLYTLY KIMVMLTQYCFILFEVIYVVVVWGDLDEVSEASYLLFTQATVCYKVSVLIAKQKARLKMF SYIS-CWIYL	TTACGGCCGGGGGAGTATCAATAGACAAAAGTATACAATCTAGCGCACTCATTCCACTGTGAGAAACAAAAGATGGCTTTAAGCTCGATAGATATATTCCTCAGTAGACCAAGAAATGTATTGGTATTCTTAGGAATATGGTTGCCACCAAAAAGATACGCTTTGCTGTATACCCTATACAAAATCATGGTTATGCTGACGCAGTACTGTTTCATACTGTTCGAAGTTATTTACGTAGTGGTAGTATGGGGGGACTTGGATGAAGTATCGGAAGCTTCGTACCTTCTGTTCACTCAGGCCACAGTCTGTTATAAGGTCTCAGTTCTCATCGCTAAACAAAAAGCAAGACTAAAAATGTTTAGTTACATTTCATGATGCTGGATATATTTGA
31840	BA_BMOR-10.1.1	refseq_rna		Bany_OR14	0	0	0	1	0	0	0	0	252	BMOR-10	Bombyx mori	NM_001123338,1 Bombyx mori olfactory receptor-like (BmOR-10), mRNA dbj|AB186512,1| Bombyx mori BmOR-10 mRNA for olfactory receptor-like receptor, complete cds	3e-10	36	84.8	88.1	40.1		3.9	FFFALLFSIFFLVQH-ALSTYKL-YIITELGVFFG-ISEN-A-LDRFIAPRNPLHTKFHE NRAVY-IQIIYKNCSFT-IDNAP	TTTTCTTTTTCGCATTATTGTTTTCCATTTTTTTTTTAGTTCAGCATTAAGCATTAAGTACTTACAAATTATAGTACATAATAACTGAGCTCGGTGTGTTTTTTGGTTAAATTTCTGAAAATTAAGCCTAGCTAGATCGATTTATAGCCCCCCGAAACCCTCTGCATACTAAATTTCATGAAAATCGAGCCGTTTACTAGATTCAGATTATATACAAGAATTGCTCGTTTACATAGATAGATAATGCACCAT
43685	BA_OR-42.1.1	refseq_protein		Bany_OR15	0	0	0	0	0	1	0	0	377	OR-42	Bombyx mori	NP_001091818,1 olfactory receptor 42 [Bombyx mori]	1e-06	127	52	52	39.8	70	12.9	LRIK-KKSILIMIHRAQKEVHITTYGFSVISLASYATILRTSWSYFTLLINMYKX-KNFV SVFCSNST-ENKYLH--VGSTVNVNICLFYFFCFKKSFSNFLDIYNQVTLLVKFMIE-II EN-KE	TTTTCTTTTTAATTTTCTATAATTTATTCAATCATAAATTTGACAAGAAGGGTTACTTGGTTATAAATATCTAAAAAGTTAGAAAAACTTTTCTTGAAACAGAAAAAGTAAAATAAACATATATTAACATTCACGGTGCTACCTACTTATTAATGTAAATATTTATTCTCCTACGTGCTATTACTGCAAAAGACACTAACAAAGTTTTTTTACNCCTTATACATATTAATCAGGAGAGTAAAATATGACCACGAAGTCCTGAGAATCGTTGCGTAACTTGCCAAAGAAATAACAGAAAATCCGTAAGTTGTTATGTGAACCTCCTTTTGTGCCCTGTGTATCATTATTAGAATGGACTTCTTTTATTTTATGCGAAG
36153	BA_contig_036153		PPR 5	Bany_OR16	0	0	0	0	0	1	0	0	455												ATAGAAAGCTTACATTAGAGAACGTTAGCATAGAGAATTCCTCTAATCCAGGAACTTTTAACGGGAGCGGTTGGAGAGATTTCTGCATTATAAGCACCAGATAAGGGCGAATCACAGTACTGGCGTCCCAGAAAGGAATATTCCAACAAGCAAATGCTATAGAAGTAACCTAACACACAAAAAATATCATAATTTTAATAAGATAATATCATCATCATTAGAAACCCACTATGCTGAGCTCGAGTCTCCTCATAGAATGAGAGGGGTTAGGCCAAAAGTACCACCACGCTGACCCAATGCGGATTTTCAGACTTCACACACGCAGAGAATTAAGAAAATTCCCTGGTATGCAGGTTTCCTCACGATGTTTTTGCTTCACTGTTTGTAGACACGTGATAT…	#N/A
