# Supplementary material for: Mosaic Evolution of Molecular Pathways for Sex Pheromone Communication in a Butterfly
Source: Genes (Basel). 2022 Jul 31;13(8):1372. doi: 10.3390/genes13081372 (PMC9407440; doi:10.3390/genes13081372)
Supplement: Supplementary file 1 [file genes-13-01372-s001.zip › Supplementary Table S4.xlsx]

## Sheet: OBP B.anynana transcriptome 
Contig (old name)	Contig (new_name)	length (bp)	Best hit from manual blastp in Genbank	Contig code (from Nieberding's lab)	lab.coding	No reads Lib 8	No reads other adult tissue libraries	RL1_GS8R7LM02	RL1_GS8R7LM03	RL1_GZKG99Z02	RL1_GZXD38A01	RL1_GZXD38A02	RL2_GS8R7LM02	RL2_GS8R7LM03	RL2_GZKG99Z02	RL2_GZXD38A01	RL2_GZXD38A02	RL3_GS8R7LM02	RL3_GS8R7LM03	RL3_GZKG99Z02	RL3_GZXD38A01	RL3_GZXD38A02	RL4_GS8R7LM02	RL4_GS8R7LM03	RL4_GZKG99Z02	RL4_GZXD38A01	RL4_GZXD38A02	RL5_GS8R7LM02	RL5_GS8R7LM03	RL5_GZKG99Z02	RL5_GZXD38A01	RL5_GZXD38A02	RL6_GS8R7LM02	RL6_GS8R7LM03	RL6_GZKG99Z02	RL6_GZXD38A01	RL6_GZXD38A02	RL7_GS8R7LM02	RL7_GS8R7LM03	RL7_GW3I2KR01	RL7_GZKG99Z02	RL7_GZXD38A01	RL7_GZXD38A02	RL8_GS8R7LM02	RL8_GS8R7LM03	RL8_GW3I2KR01	RL8_GZKG99Z02	RL8_GZXD38A01	RL8_GZXD38A02
GZXD38A01BULAD.b.ba.1	BA_OBP1.14.14	392	OBP1 Bm	CN42	OBP1	7	0	0	0	0	0	0	0	0	0	0	0	0	0	0	0	0	0	0	0	0	0	0	0	0	0	0	0	0	0	0	0	0	0	0	0	0	0	0	0	0	0	3	4
GS8R7LM03EMD3J .b.ba.1	BA_AAEL_AAEL006454.1.1	512	OBP1 Bm	CN12	OBP1	100	3	0	0	0	0	0	0	0	0	0	0	0	0	0	0	0	0	0	0	0	0	0	0	0	0	0	0	0	0	0	0	0	0	3	0	0	0	0	0	1	37	29	33
GE680338.b.ba.1	BA_OBP1.13.14	550	OBP1 Dplex EHJ65653.1	CN5	OBP2	186	6	0	0	0	0	0	0	0	0	0	0	0	0	0	0	0	0	0	0	0	0	0	0	0	0	0	0	0	0	0	0	0	0	6	0	0	0	0	1	6	69	61	49
GS8R7LM03EULY6 .b.ba.1	BA_OB76A.1.1	550	OBP1 Dplex EHJ65653.1	CN6	OBP2	25	1	0	0	0	0	0	0	0	0	0	0	0	0	0	0	0	0	0	0	0	0	0	0	0	0	0	0	0	0	0	0	0	0	1	0	0	0	0	1	2	6	9	7
GZXD38A01B8Y5N	BA_OBP2.29.29	623	GOBP1 Bm/ GOBP2 Dplex EHJ71306.1	CN43	OBP3a	0	0	NA	NA	NA	NA	NA	NA	NA	NA	NA	NA	NA	NA	NA	NA	NA	NA	NA	NA	NA	NA	NA	NA	NA	NA	NA	NA	NA	NA	NA	NA	NA	NA	NA	NA	NA	NA	NA	NA	NA	NA	NA	NA
GE680582 .b.ba.1	BA_GOBP2.31.39	806	GOBP1 Bm/ GOBP2 Dplex EHJ71306.1	CN32	OBP3a	64	0	0	0	0	0	0	0	0	0	0	0	0	0	0	0	0	0	0	0	0	0	0	0	0	0	0	0	0	0	0	0	0	0	0	0	0	0	0	1	1	19	21	22
GE684370 .b.ba.1	BA_GOBP2.35.39	1404	GOBP1 Bm/ GOBP2 Dplex EHJ71306.1	CN29	OBP3a	73	0	0	0	0	0	0	0	0	0	0	0	0	0	0	0	0	0	0	0	0	0	0	0	0	0	0	0	0	0	0	0	0	0	0	0	0	0	0	2	1	20	24	26
GS8R7LM03DK2TO .b.ba.1	BA_GOBP2.39.39	1529	GOBP1 Bm/ GOBP2 Dplex EHJ71306.1	CN22	OBP3a	170	4	0	0	0	0	0	0	0	0	0	0	0	0	0	0	0	0	0	0	0	0	0	0	0	0	0	0	0	0	0	0	0	0	4	0	0	0	0	2	3	30	71	64
GW3I2KR01CVXZX .b.ba.1	BA_GOBP2.33.39	947	GOBP1 Bm/ GOBP2 Dplex EHJ71306.1	CN34-35 fused	OBP3b	34	1	0	0	0	0	0	0	0	0	0	0	0	0	0	0	0	0	0	0	0	0	0	0	0	0	0	0	0	0	0	0	0	0	1	0	0	0	0	1	1	8	13	11
GZXD38A01B7FTS .b.ba.1	BA_GOBP2.34.39	608	GOBP1 Bm/ GOBP2 Dplex EHJ71306.1	CN40	OBP3b	22	1	0	0	0	0	0	0	0	0	0	0	0	0	0	0	0	0	0	0	0	0	0	0	0	0	0	0	0	0	0	0	0	0	1	0	0	0	0	0	0	2	6	14
GS8R7LM02B5M46 .b.ba.1	BA_GOBP2.32.39	1577	GOBP1 Bm/ GOBP2 Dplex EHJ71306.1	CN17	OBP3b	431	11	0	0	0	0	0	0	0	0	0	0	0	0	0	0	0	0	0	0	0	0	0	0	0	0	0	0	0	0	0	0	0	0	11	0	0	0	2	3	19	91	143	173
GE654902 .b.ba.1	BA_GOBP2.27.39	1541	GOBP1 Bm/ GOBP2 Dplex EHJ71306.1	CN18	OBP3b	507	23	0	0	0	0	0	0	0	0	0	0	0	0	0	0	0	0	0	0	0	0	0	0	0	0	0	0	0	0	0	0	0	0	23	0	0	0	4	6	17	149	165	166
GS8R7LM02B0493 .b.ba.1	BA_OBP2.24.29	1465	GOBP1 Bm/ GOBP2 Dplex EHJ71306.1	CN19	OBP3b	0	0	NA	NA	NA	NA	NA	NA	NA	NA	NA	NA	NA	NA	NA	NA	NA	NA	NA	NA	NA	NA	NA	NA	NA	NA	NA	NA	NA	NA	NA	NA	NA	NA	NA	NA	NA	NA	NA	NA	NA	NA	NA	NA
GW3I2KR01B64MG .b.ba.1	BA_OBP1.8.14	1147	GOBP1 Bm/ GOBP2 Dplex EHJ71306.1	CN1	OBP3c	47	0	0	0	0	0	0	0	0	0	0	0	0	0	0	0	0	0	0	0	0	0	0	0	0	0	0	0	0	0	0	0	0	0	0	0	0	0	0	0	1	12	14	20
GW3I2KR01BW94F .b.ba.1	BA_OBP1.12.14	968	GOBP1 Bm/ GOBP2 Dplex EHJ71306.1	CN26	OBP3c	23	1	0	0	0	0	0	0	0	0	0	0	0	0	0	0	0	0	0	0	0	0	0	0	0	0	0	0	0	0	0	0	0	0	1	0	0	0	0	0	1	5	9	8
GZKG99Z02CZ4PM .b.ba.1	BA_OBP2.25.29	774	GOBP1 Bm/ GOBP2 Dplex EHJ71306.1	CN39	OBP3c	22	1	0	0	0	0	0	0	0	0	0	0	0	0	0	0	0	0	0	0	0	0	0	0	0	0	0	0	0	0	0	0	0	0	1	0	0	0	0	0	0	6	10	6
GS8R7LM03DRG7F .b.ba.1	BA_contig_099454	982	GOBP1 Bm/ GOBP2 Dplex EHJ71306.1	CN33	OBP3c	15	4	0	0	0	0	0	0	0	1	0	2	0	0	0	0	0	0	0	0	0	0	0	0	0	0	0	0	0	0	0	0	0	0	1	0	0	0	0	1	1	4	4	5
GW3I2KR01AJ48K .b.ba.	BA_GOBP2.28.39	1104	GOBP1 Bm/ GOBP2 Dplex EHJ71306.1	CN25	OBP3d?	0	0	NA	NA	NA	NA	NA	NA	NA	NA	NA	NA	NA	NA	NA	NA	NA	NA	NA	NA	NA	NA	NA	NA	NA	NA	NA	NA	NA	NA	NA	NA	NA	NA	NA	NA	NA	NA	NA	NA	NA	NA	NA	NA
GE679318 .b.ba.1	BA_GOBP1.7.10	609	GOBP1 Dplex EHJ71309	CN30	OBP4a	36	0	0	0	0	0	0	0	0	0	0	0	0	0	0	0	0	0	0	0	0	0	0	0	0	0	0	0	0	0	0	0	0	0	0	0	0	0	0	0	0	7	10	19
GW3I2KR01B8IJW .b.ba.1	BA_GOBP1.9.10	924	GOBP1 Dplex EHJ71309	CN31	OBP4a	36	0	0	0	0	0	0	0	0	0	0	0	0	0	0	0	0	0	0	0	0	0	0	0	0	0	0	0	0	0	0	0	0	0	0	0	0	0	0	0	3	5	14	14
GZKG99Z02D6PVR .b.ba.1	BA_GOBP1.6.10	716	GOBP1 Dplex EHJ71309	CN2	OBP4a	21	0	0	0	0	0	0	0	0	0	0	0	0	0	0	0	0	0	0	0	0	0	0	0	0	0	0	0	0	0	0	0	0	0	0	0	0	0	0	0	1	5	7	8
GE679317 .b.ba.1	BA_GOBP1.5.10	2091	GOBP1 Dplex EHJ71309	CN3	OBP4a	731	22	0	0	0	0	0	0	0	0	0	0	0	0	0	0	0	0	0	0	0	0	0	0	0	0	0	0	0	0	0	0	0	0	22	0	0	0	2	10	21	171	250	277
GE686547 .b.ba.1	BA_GOBP1.10.10	1823	GOBP1 Dplex EHJ71309	CN4	OBP4a	303	12	0	0	0	0	0	0	0	0	0	0	0	0	0	0	0	0	0	0	0	0	0	0	0	0	0	0	0	0	0	0	0	0	12	0	0	0	0	3	9	62	110	119
GS8R7LM03C9PJO .b.ba.1	BA_GOBP1.8.10	1413	GOBP1 Dplex EHJ71309	CN16	OBP4a	144	3	0	0	0	0	0	0	0	0	0	0	0	0	0	0	0	0	0	0	0	0	0	0	0	0	0	0	0	0	0	0	0	0	3	0	0	0	1	2	2	30	61	48
GE682000 .b.ba.1	BA_PBP3.5.8	1014	GOBP1 Dplex EHJ71309	CN7	OBP4b	129	0	0	0	0	0	0	0	0	0	0	0	0	0	0	0	0	0	0	0	0	0	0	0	0	0	0	0	0	0	0	0	0	0	0	0	0	0	0	0	3	28	61	37
GW3I2KR01AEGGI .b.ba.1	BA_PBP3.6.8	762	GOBP1 Dplex EHJ71309	CN8	OBP4b	16	3	0	0	0	0	0	0	0	0	0	0	0	0	0	0	0	0	0	0	0	0	0	0	0	0	0	0	0	0	0	0	0	0	3	0	0	0	0	0	1	4	9	2
GE686922 .b.ba.1	BA_PBP3.8.8	954	GOBP1 Dplex EHJ71309	CN9	OBP4b	38	0	0	0	0	0	0	0	0	0	0	0	0	0	0	0	0	0	0	0	0	0	0	0	0	0	0	0	0	0	0	0	0	0	0	0	0	0	1	0	2	11	14	10
GW3I2KR01A0OH8 .b.ba.1	BA_OBP1.10.14	1588	GOBP1 Dplex EHJ71309	CN24	OBP4b	45	3	0	0	0	0	0	0	0	0	0	0	0	0	0	0	0	0	0	0	0	0	0	0	0	0	0	0	0	0	0	0	0	0	3	0	0	0	0	0	0	10	18	17
GW3I2KR01E2YNH .b.ba.1	BA_PBP4.1.2	532	OBP7 Bmori/ ABP5 Dplex EHJ78968.1	CN10	OBP5	33	0	0	0	0	0	0	0	0	0	0	0	0	0	0	0	0	0	0	0	0	0	0	0	0	0	0	0	0	0	0	0	0	0	0	0	0	0	0	0	1	17	12	3
GE680903 .b.ba.1	BA_contig_098743	729	OBP7 Bmori/ ABP5 Dplex EHJ78968.1	CN11	OBP5	89	1	0	0	0	0	0	0	0	0	0	0	0	0	0	0	0	0	0	0	0	0	0	0	0	0	0	0	0	0	0	0	0	0	1	0	0	0	0	0	2	17	30	40
GE680902 .b.ba.1	BA_contig_098774	987	OBP7 Bmori/ ABP5 Dplex EHJ78968.1	CN20	OBP5	439	10	0	0	0	0	0	1	0	2	0	0	0	0	0	0	0	0	0	0	0	0	0	0	0	0	0	0	0	0	0	0	0	0	7	0	0	0	0	1	13	122	152	151
GS8R7LM03D9HP1 .b.ba.1	BA_PBP4.2.2	698	OBP7 Bmori/ ABP5 Dplex EHJ78968.1	CN23	OBP5	64	2	0	0	0	0	0	0	0	0	0	0	0	0	0	0	0	0	0	0	0	0	0	0	0	0	0	0	0	0	0	0	0	0	2	0	0	0	0	1	0	12	28	23
GE681934 .b.ba.1	BA_contig_115479	646	PBP3 Bmori	CN28	OBP6a	15	13	0	0	0	0	0	0	0	0	0	0	0	1	0	4	4	0	0	0	1	0	0	0	0	1	0	0	0	0	0	0	0	0	2	0	0	0	0	0	1	4	7	3
GE678549 .b.ba.1	BA_CPIPJ_CPIJ001365.1.2	682	PBP3 Bmori	CN13	OBP6a	30	12	0	0	0	0	0	0	0	0	0	0	0	3	2	3	1	0	0	0	1	1	0	0	0	0	1	0	0	0	0	0	0	0	0	0	0	0	0	0	6	5	8	11
GS8R7LM02B1WGH .b.ba.1	BA_OBP56G.1.1	736	PBP3 Bmori	CN14	OBP6a	1	33	0	0	0	0	0	0	0	0	0	0	2	10	3	5	8	0	0	0	0	0	0	0	0	0	0	0	0	0	0	0	0	1	4	0	0	0	0	0	1	0	0	0
GZKG99Z02D3ZH1 .b.ba.1	BA_contig_099737	393	PBP3 predicted Bmori	CN46	OBP6b	14	0	0	0	0	0	0	0	0	0	0	0	0	0	0	0	0	0	0	0	0	0	0	0	0	0	0	0	0	0	0	0	0	0	0	0	0	0	0	0	0	1	8	5
GZKG99Z02DM7MM .b.ba.1	BA_PBP3.4.8	521	PBP3 predicted Bmori	CN47	OBP6b	138	1	0	0	0	0	0	0	0	0	0	0	0	0	0	0	0	0	0	0	0	0	0	0	0	0	0	0	0	0	0	0	0	0	1	0	0	0	0	3	7	82	33	13
GE680035 .b.ba.1	BA_DVIR_GJ14502.1.1	600	PBP3 predicted Bmori	CN37	OBP6b	88	1	0	0	0	0	0	0	0	0	0	0	0	0	0	0	0	0	0	0	0	0	0	0	0	0	0	0	0	0	0	0	0	0	1	0	0	0	0	0	4	33	32	19
GZKG99Z02C7YYH .b.ba.1	BA_DANA_GF18635.4.7	599	PBP3 predicted Bmori	CN38	OBP6b	27	0	0	0	0	0	0	0	0	0	0	0	0	0	0	0	0	0	0	0	0	0	0	0	0	0	0	0	0	0	0	0	0	0	0	0	0	0	0	0	0	14	9	4
GZKG99Z02C6VHV .b.ba.1	BA_DANA_GF18635.7.7	593	PBP3 predicted Bmori	CN44	OBP6b	41	1	0	0	0	0	0	0	0	0	0	0	0	0	0	0	0	0	0	0	0	0	0	0	0	0	0	0	0	0	0	0	0	0	1	0	0	0	0	0	2	18	11	10
GE680950 .b.ba.1	BA_DANA_GF18635.3.7	1478	PBP3 predicted Bmori	CN15	OBP6b	636	31	0	0	0	0	0	0	0	0	0	0	0	0	0	0	1	0	0	0	0	0	0	0	0	0	0	0	0	0	0	0	0	0	30	0	0	0	4	10	45	369	112	96
GZKG99Z02C1ZKR .b.ba.1	BA_DANA_GF18635.5.7	538	PBP3 predicted Bmori	CN27	OBP6b	33	0	0	0	0	0	0	0	0	0	0	0	0	0	0	0	0	0	0	0	0	0	0	0	0	0	0	0	0	0	0	0	0	0	0	0	0	0	0	2	0	10	13	8
GE660702 .b.ba.1	BA_OBP5.5.7	1208	OBP Bmori BAI44700.1 / OBP5 Dplex EHJ67764.1	CN21	OBP7	133	9	0	0	0	0	0	0	0	0	0	0	0	0	0	0	0	0	0	0	0	0	0	0	0	0	2	0	0	0	0	0	0	0	7	0	0	0	0	2	2	41	50	38
GW3I2KR01AZ1VU .b.ba.1	BA_PBP1.5.6	553	ABPX Bmori / ABPX D plex EHJ75781.1	CN36	OBP9	70	2	0	0	0	0	0	0	0	0	0	0	0	0	0	0	0	0	0	0	0	0	0	0	0	0	0	0	0	0	0	0	0	0	2	0	0	0	0	0	6	15	25	24
GE680205 .b.ba.1	BA_PBP1.2.6	542	ABPX Bmori / ABPX D plex EHJ75781.1	CN45	OBP9	221	4	0	0	0	0	0	0	0	0	0	0	0	0	0	0	0	0	0	0	0	0	0	0	0	0	0	0	0	0	0	0	0	0	4	0	0	0	0	2	3	72	78	66
[truncated: 12 more columns]

## Sheet: OBP unigene expression 
Expression levels of OBP unigenes in B. anynana transcriptome
OBP unigene	Antennae (no. 8; no. of reads of all contigs)	Control adult tissues (wings, heads, no's 3-7, no. of reads of all contigs)
OBP1	107	3
OBP2	211	7
OBP3a	307	4
OBP3b	994	36
OBP3c	107	6
OBP3d	0	0
OBP4a	1271	37
OBP4b	228	6
OBP5	625	13
OBP6a	46	58
OBP6b	977	34
OBP7	133	9
OBP9	291	6
