# Supplementary material for: Mosaic Evolution of Molecular Pathways for Sex Pheromone Communication in a Butterfly
Source: Genes (Basel). 2022 Jul 31;13(8):1372. doi: 10.3390/genes13081372 (PMC9407440; doi:10.3390/genes13081372)
Supplement: Supplementary file 1 [file genes-13-01372-s001.zip › Supplementary Table S5.xlsx]

## Sheet: CSP contigs B.any transcriptome
contig	new contig name	length	lab coding	RL1	RL2	RL3	RL4	RL5	RL6	RL7	RL8	Database	Accession	Species	Description	Evalue	Score	X..hit.identity	X..Query.identity	X..Query.coverage	X..Query.conserved	X..Subject.coverage	gene_name
GE679353.b.ba.1 b.ba.1	BA_CSP5.11.20	843	CSP1a	0	0	0	0	0	0	0	0	NA	NA	NA	NA	NA	NA	NA	NA	NA	NA	NA	NA
GE678284 .b.ba.1	BA_CSP5.10.20	752	CSP1a	0	0	0	0	0	1	2	2	refseq_protein	NP_001037062.1	Bombyx mori	NP_001037062.1 chemosensory protein 5 precursor [Bombyx mori]	3e-45	390	64.8	65.4	42.7	83.2	86.4	CSP5
GE663933 .b.ba.1	BA_CSP5.9.20	759	CSP1a	0	0	0	4	0	1	13	19	refseq_protein	NP_001037062.1	Bombyx mori	NP_001037062.1 chemosensory protein 5 precursor [Bombyx mori]	1e-45	393	65.7	66.4	42.3	83.2	86.4	CSP5
GZXD38A02GLOE4.b .ba.1	BA_CSP5.20.20	612	CSP1a	0	0	0	5	3	2	13	13	refseq_protein	NP_001037062.1	Bombyx mori	NP_001037062.1 chemosensory protein 5 precursor [Bombyx mori]	2e-32	301	56.7	57.3	50.5	73.8	83.2	CSP5
GE654804 .b.ba.1	BA_CSP5.18.20	835	CSP1a	0	0	3	11	4	0	60	47	refseq_protein	NP_001037062.1	Bombyx mori	NP_001037062.1 chemosensory protein 5 precursor [Bombyx mori]	4e-45	392	65.7	66.4	38.4	83.2	86.4	CSP5
GE654863. b.ba.1	BA_CSP3.4.4	924	CSP1a	0	0	0	0	0	0	0	1	refseq_protein	NP_001037063.1	Bombyx mori	NP_001037063.1 chemosensory protein 3 precursor [Bombyx mori]	9e-42	372	63.6	65.4	34.7	81.3	86.6	CSP3
GE681550 .b.ba.1	BA_CSP5.13.20	944	CSP1a	0	0	7	13	14	9	129	134	refseq_protein	NP_001037062.1	Bombyx mori	NP_001037062.1 chemosensory protein 5 precursor [Bombyx mori]	2e-45	397	66.7	67.3	34	84.1	86.4	CSP5
GE702886.b.ba.1	BA_CSP5.12.20	600	CSP1b	2	3	2	0	0	0	0	0	refseq_protein	NP_001037062.1	Bombyx mori	NP_001037062.1 chemosensory protein 5 precursor [Bombyx mori]	2e-45	387	55.6	55.6	62	73.4	98.4	CSP5
GE702887 .b.ba.1	BA_CSP5.14.20	583	CSP1b	0	0	0	0	0	0	0	0	refseq_protein	NP_001037062.1	Bombyx mori	NP_001037062.1 chemosensory protein 5 precursor [Bombyx mori]	4e-46	391	56.5	56.5	63.8	73.4	98.4	CSP5
GE688457 .b.ba.1	BA_CSP5.8.20	579	CSP1b	0	0	0	0	0	0	0	0	refseq_protein	NP_001037062.1	Bombyx mori	NP_001037062.1 chemosensory protein 5 precursor [Bombyx mori]	1e-44	381	55.6	55.6	64.2	71	98.4	CSP5
GE682922. b.ba.1	BA_CSP5.7.20	470	CSP1b	0	0	0	0	0	0	0	0	refseq_protein	NP_001037062.1	Bombyx mori	NP_001037062.1 chemosensory protein 5 precursor [Bombyx mori]	2e-21	224	42.7	42.7	65.7	59.2	81.6	CSP5
DY764877 .b.ba.1	BA_CSP5.15.20	520	CSP1b	17	19	4	2	0	0	8	5	refseq_protein	NP_001037062.1	Bombyx mori	NP_001037062.1 chemosensory protein 5 precursor [Bombyx mori]	7e-46	387	55.6	55.6	71.5	73.4	98.4	CSP5
GE682934 .b.ba.1	BA_PEB3.15.59	938	CSP1c?	0	0	17	12	14	0	6	114	swissprot	PEB3_DROME	Drosophila melanogaster	PEB3_DROME (sp|Q9W1C9) Ejaculatory bulb-specific protein 3 OS=Drosophila melanogaster GN=PebIII PE=1 SV=2	9e-27	261	38.5	38.5	37.4	64.1	92.9	PEB3
GE677609. b.ba.1	BA_PEB3.13.59	692	CSP1d?	0	0	0	0	0	0	0	1	swissprot	PEB3_DROME	Drosophila melanogaster	PEB3_DROME (sp|Q9W1C9) Ejaculatory bulb-specific protein 3 OS=Drosophila melanogaster GN=PebIII PE=1 SV=2	1e-23	235	42.9	42.9	45.5	58.1	83.3	PEB3
GS8R7LM03ECKI7 .b.ba.1	BA_OB10.7.17	584	CSP2	0	0	0	0	0	0	5	66	swissprot	OB10_DROME	Drosophila melanogaster	OB10_DROME (sp|Q27377) Putative odorant-binding protein A10 OS=Drosophila melanogaster GN=a10 PE=1 SV=2	2e-38	333	55.8	55.8	53.4	76	67.1	OB10
GE680616 .b.ba.1	BA_OB10.12.17	2073	CSP2	0	0	1	0	0	0	32	1045	swissprot	OB10_DROME	Drosophila melanogaster	OB10_DROME (sp|Q27377) Putative odorant-binding protein A10 OS=Drosophila melanogaster GN=a10 PE=1 SV=2	8e-35	333	55.8	55.8	15.1	76	67.1	OB10
GW3I2KR01EVFYN .b.ba.1	BA_OB10.8.17	578	CSP2	0	0	0	1	0	0	0	29	swissprot	OB10_DROME	Drosophila melanogaster	OB10_DROME (sp|Q27377) Putative odorant-binding protein A10 OS=Drosophila melanogaster GN=a10 PE=1 SV=2	2e-31	286	50	54.2	49.8	75	67.1	OB10
DY767819 .b.ba.1	BA_CSP3.3.4	697	CSP3a	4	2	0	0	0	0	0	1	refseq_protein	NP_001037063.1	Bombyx mori	NP_001037063.1 chemosensory protein 3 precursor [Bombyx mori]	3e-35	322	56.4	56.4	43.5	72.3	79.5	CSP3
DY769858.b .ba.1	BA_OB10.6.17	1083	CSP3a	6	3	0	0	0	0	1	1	swissprot	OB10_DROME	Drosophila melanogaster	OB10_DROME (sp|Q27377) Putative odorant-binding protein A10 OS=Drosophila melanogaster GN=a10 PE=1 SV=2	9e-22	231	34	39	34.1	60.2	91	OB10
GW3I2KR01DHL9Q.b.ba.1	BA_CSP3.2.4	517	CSP3a	0	1	0	0	0	0	0	4	refseq_protein	NP_001037063.1	Bombyx mori	NP_001037063.1 chemosensory protein 3 precursor [Bombyx mori]	5e-36	322	56.4	56.4	58.6	72.3	79.5	CSP3
GZKG99Z02DRQ7I.b.ba.1	BA_LOC100747203.1.2	385	CSP3b?	0	0	0	0	0	0	0	0	NA	NA	NA	NA	NA	NA	NA	NA	NA	NA	NA	NA
GE678454 .b.ba.1	BA_OB10.5.17	654	CSP3b?	0	0	0	0	0	0	0	0	swissprot	OB10_DROME	Drosophila melanogaster	OB10_DROME (sp|Q27377) Putative odorant-binding protein A10 OS=Drosophila melanogaster GN=a10 PE=1 SV=2	1e-08	133	39.7	39.7	28.9	57.1	40.6	OB10
GE682936 .b.ba.1	BA_contig_086402	689	CSP3b?	0	0	18	18	14	0	7	92	NA	NA	NA	NA	NA	NA	NA	NA	NA	NA	NA	NA
GS8R7LM03DFXBC .b.ba.1	BA_CSP4.23.33	563	CSP3c	0	0	3	7	10	0	11	86	refseq_protein	NP_001037052.1	Bombyx mori	NP_001037052.1 chemosensory protein 4 precursor [Bombyx mori]	1e-32	298	66.2	66.2	49.4	82.5	63	CSP4
GZKG99Z02DNZUF .b.ba.1	BA_CSP4.32.33	570	CSP3c	0	0	0	0	0	0	0	3	refseq_protein	NP_001037052.1	Bombyx mori	NP_001037052.1 chemosensory protein 4 precursor [Bombyx mori]	1e-46	394	63.4	63.4	58.9	77.7	88.2	CSP4
GZKG99Z02EEHT7.b.ba.1	BA_CSP4.28.33	568	CSP3c	0	0	0	0	0	0	0	0	NA	NA	NA	NA	NA	NA	NA	NA	NA	NA	NA	NA
GE654944 .b.ba.1	BA_CSP4.25.33	571	CSP3c	0	1	49	61	69	4	67	593	refseq_protein	NP_001037052.1	Bombyx mori	NP_001037052.1 chemosensory protein 4 precursor [Bombyx mori]	1e-49	413	65.8	65.8	58.3	82	87.4	CSP4
GW3I2KR01BYSQ1 .b.ba.1	BA_CSP4.24.33	561	CSP3c	1	0	7	2	8	0	13	91	refseq_protein	NP_001037052.1	Bombyx mori	NP_001037052.1 chemosensory protein 4 precursor [Bombyx mori]	2e-48	405	64.9	64.9	59.4	81.1	87.4	CSP4
GZKG99Z02C320U .b.ba.1	BA_CSP4.27.33	556	CSP4	0	0	0	0	0	0	2	7	refseq_protein	NP_001037052.1	Bombyx mori	NP_001037052.1 chemosensory protein 4 precursor [Bombyx mori]	1e-48	406	63.2	63.2	61.5	79.8	89.8	CSP4
DY764390 .b.ba.1	BA_PEB3.59.59	1427	CSP5a	13	5	0	0	0	0	2	1	swissprot	PEB3_DROME	Drosophila melanogaster	PEB3_DROME (sp|Q9W1C9) Ejaculatory bulb-specific protein 3 OS=Drosophila melanogaster GN=PebIII PE=1 SV=2	8e-17	196	32.1	32.1	22.3	57.5	84.1	PEB3
DY768274 .b.ba.1	BA_CSP14.1.1	578	CSP5a	0	0	0	0	0	0	0	0	refseq_protein	NP_001037192.1	Bombyx mori	NP_001037192.1 chemosensory protein 14 precursor [Bombyx mori]	2e-46	392	61.1	61.1	65.4	73	99.2	CSP14
GZXD38A02JGT3S .b.ba.1	BA_CSP10.50.64	383	CSP5b	1	0	0	0	0	0	0	3	refseq_protein	NP_001037064.1	Bombyx mori	NP_001037064.1 chemosensory protein 10 [Bombyx mori]	2e-33	300	69.2	70.1	60.3	84.4	65	CSP10
GE654733 .b.ba.1	BA_PEB3.26.59	1199	CSP5b	38	20	163	99	204	1	93	667	swissprot	PEB3_DROME	Drosophila melanogaster	PEB3_DROME (sp|Q9W1C9) Ejaculatory bulb-specific protein 3 OS=Drosophila melanogaster GN=PebIII PE=1 SV=2	5e-31	295	42.7	42.7	31	68.5	96.8	PEB3
GS8R7LM02B5XX6 .b.ba.1	BA_PEB3.30.59	638	CSP5b	2	1	15	24	16	0	14	73	swissprot	PEB3_DROME	Drosophila melanogaster	PEB3_DROME (sp|Q9W1C9) Ejaculatory bulb-specific protein 3 OS=Drosophila melanogaster GN=PebIII PE=1 SV=2	4e-32	290	42.3	42.3	57.8	68.3	96	PEB3
GS8R7LM03D11QU .b.ba.1	BA_PEB3.47.59	625	CSP5b	1	0	6	10	15	0	7	52	swissprot	PEB3_DROME	Drosophila melanogaster	PEB3_DROME (sp|Q9W1C9) Ejaculatory bulb-specific protein 3 OS=Drosophila melanogaster GN=PebIII PE=1 SV=2	2e-32	292	41.9	41.9	59.5	68.5	96.8	PEB3
GS8R7LM03DEVSR .b.ba.1	BA_PEB3.42.59	639	CSP5b	1	0	3	1	2	0	0	15	swissprot	PEB3_DROME	Drosophila melanogaster	PEB3_DROME (sp|Q9W1C9) Ejaculatory bulb-specific protein 3 OS=Drosophila melanogaster GN=PebIII PE=1 SV=2	1e-31	286	42.1	42.1	56.8	68.6	94.4	PEB3
GS8R7LM02B4IYA .b.ba.1	BA_PEB3.44.59	564	CSP5b	0	0	10	6	7	0	6	23	swissprot	PEB3_DROME	Drosophila melanogaster	PEB3_DROME (sp|Q9W1C9) Ejaculatory bulb-specific protein 3 OS=Drosophila melanogaster GN=PebIII PE=1 SV=2	1e-18	197	33.9	40	55.9	65.7	96.8	PEB3
GS8R7LM03EPSCJ .b.ba.1	BA_CSP10.58.64	651	CSP5b	0	0	1	1	4	0	0	6	refseq_protein	NP_001037064.1	Bombyx mori	NP_001037064.1 chemosensory protein 10 [Bombyx mori]	8e-34	311	51.3	69.8	39.6	86	97.5	CSP10
GS8R7LM03DX9NO .b.ba.1	BA_PEB3.35.59	430	CSP5b	0	1	2	3	3	0	1	3	swissprot	PEB3_DROME	Drosophila melanogaster	PEB3_DROME (sp|Q9W1C9) Ejaculatory bulb-specific protein 3 OS=Drosophila melanogaster GN=PebIII PE=1 SV=2	3e-13	158	43.3	43.3	41.9	71.7	47.6	PEB3
GE675904 .b.ba.1	BA_PEB3.49.59	563	CSP6	0	0	0	0	0	0	0	0	swissprot	PEB3_DROME	Drosophila melanogaster	PEB3_DROME (sp|Q9W1C9) Ejaculatory bulb-specific protein 3 OS=Drosophila melanogaster GN=PebIII PE=1 SV=2	5e-09	132	30.3	30.8	57	51.4	85.7	PEB3
GS8R7LM02CKEHQ .b.ba.1	BA_AAEL_AAEL002038.1.1	632	CSP6	0	0	0	0	0	0	3	92	refseq_protein	XP_001660778.1	Aedes aegypti	XP_001660778.1 protein serine/threonine kinase, putative [Aedes aegypti] ref|XP_001660779.1| protein serine/threonine kinase, putative [Aedes aegypti]	2e-07	132	33.7	33.7	39.4	55.4	64.8	AAEL_AAEL002038
GE675905. b.ba.1	BA_PEB3.48.59	567	CSP6	0	0	0	0	0	0	0	0	swissprot	PEB3_DROME	Drosophila melanogaster	PEB3_DROME (sp|Q9W1C9) Ejaculatory bulb-specific protein 3 OS=Drosophila melanogaster GN=PebIII PE=1 SV=2	2e-07	121	29.8	30.1	49.2	50.5	73.8	PEB3
GE681621 .b.ba.1	BA_CSP11.34.35	899	CSP7	0	1	0	1	1	0	6	204	refseq_protein	NP_001091779.1	Bombyx mori	NP_001091779.1 chemosensory protein 11 precursor [Bombyx mori]	7e-52	438	66.1	66.1	38.4	87	95	CSP11
GE681622 .b.ba.1	BA_CSP11.24.35	490	CSP7	1	0	0	0	0	0	7	136	refseq_protein	NP_001091779.1	Bombyx mori	NP_001091779.1 chemosensory protein 11 precursor [Bombyx mori]	4e-53	433	65.8	65.8	69.8	86.8	94.2	CSP11
GW3I2KR01BDRM7 .b.ba.1	BA_CSP11.26.35	488	CSP7	0	0	0	0	0	0	0	47	refseq_protein	NP_001091779.1	Bombyx mori	NP_001091779.1 chemosensory protein 11 precursor [Bombyx mori]	6e-53	432	67.6	67.6	68.2	88.3	91.7	CSP11
GZXD38A01CKRW4. b.ba.1	BA_CSP11.11.35	437	CSP7	0	3	0	0	2	0	1	8	refseq_protein	NP_001091779.1	Bombyx mori	NP_001091779.1 chemosensory protein 11 precursor [Bombyx mori]	2e-09	133	67.6	67.6	63.7	88.2	28.1	CSP11
GZKG99Z02DC301 .b.ba.1	BA_PEB3.56.59	414	CSP8	0	0	3	1	2	0	2	5	swissprot	PEB3_DROME	Drosophila melanogaster	PEB3_DROME (sp|Q9W1C9) Ejaculatory bulb-specific protein 3 OS=Drosophila melanogaster GN=PebIII PE=1 SV=2	1e-12	153	40.7	41.2	61.6	57.6	68.3	PEB3
GS8R7LM02B06EY .b.ba.1	BA_PEB3.52.59	653	CSP8	0	0	87	63	89	0	63	123	swissprot	PEB3_DROME	Drosophila melanogaster	PEB3_DROME (sp|Q9W1C9) Ejaculatory bulb-specific protein 3 OS=Drosophila melanogaster GN=PebIII PE=1 SV=2	2e-17	192	41.5	41.5	43.2	52.1	74.6	PEB3
GS8R7LM03EQYVF.b.ba.1	BA_CPIPJ_CPIJ002611.1.2	348	CSP8	0	0	1	1	0	0	0	1	refseq_protein	XP_001844680.1	Culex quinquefasciatus	XP_001844680.1 sensory appendage protein [Culex quinquefasciatus] ref|XP_001870510.1| sensory appendage protein [Culex quinquefasciatus]	3e-06	119	61.1	61.1	31	72.2	27.9	CPIPJ_CPIJ002611

## Sheet: Total number of ESTs
	Total number of ESTs per library
CSP_Bany unigenes (Nieberding lab's coding)	RL1	RL2	RL3	RL4	RL5	RL6	RL7	RL8
CSP1a	0	0	10	33	21	13	217	216
CSP1b	19	22	6	2	0	0	8	5
CSP1c	0	0	17	12	14	0	6	114
CSP1d	0	0	0	0	0	0	0	1
CSP2	0	0	1	1	0	0	37	1140
CSP3a	10	6	0	0	0	0	1	6
CSP3b	0	0	18	18	14	0	7	92
CSP3c	1	1	59	70	87	4	91	773
CSP4	0	0	0	0	0	0	2	7
CSP5a	13	5	0	0	0	0	2	1
CSP5b	43	22	200	144	251	1	121	842
CSP6	0	0	0	0	0	0	3	92
CSP7	1	4	0	1	3	0	14	395
CSP8	0	0	91	65	91	0	65	129
