# Supplementary material for: Mosaic Evolution of Molecular Pathways for Sex Pheromone Communication in a Butterfly
Source: Genes (Basel). 2022 Jul 31;13(8):1372. doi: 10.3390/genes13081372 (PMC9407440; doi:10.3390/genes13081372)
Supplement: Supplementary file 1 [file genes-13-01372-s001.zip › Supplementary Table S6.xlsx]

## Sheet: Supplementary Table S6
gene name	old contig name	new contig name	forward primer	reverse primer	amplicon	sequence
PRODUCTION
delta 9 desaturase	GE661686.b.ba.1	BA_ACO11.6.7	CGATTCATACAGAACCCACGA	TAGCACTTGGCGAGTTACGA	CGATTCATACAGAACCCACGACCCCTGCTGCTGGCCCTGTGGTGGCATTGTGCTTATAGGGGTATAACTTATTCACCGAAGAGGTTTATTAAGTTAGCACTTGGCGAGTTACGA	ACCATGTTCTCTTTCCTGGGGGGGCCGCGCGCCAAAAGAATGGTGTAGAAAGCTTCTGGAGGGCGGAGGCGGCCACATGTTTTTTTTTTTTTTCTTTTTATATTTCTAACAATCTATTTTTAACATTTTCCTAATTTTCCATACAAATATTTAATAAATAATAATCAAACTTTAAATATTCTTAAATATCACATTATCCGTCACAGTCAAAATGTCTCTACACATAGGATATTGCAAAGCATATCTAATAATCCGTTCTGGATTTGTCATTTTGTACCAAGAAGTTTCACAAAAATCTACTGTGAATGTTCATGTAATTCTTTATGTAATTCTTCGAAGCCCCATTCTTGGTGCGTGCCGTCTCCTGTCCTCTTCACCCTCTTCTCAATAACGTCTGGT…
delta 11 desaturase	GS8R7LM02B6ONJ.b.ba.1	BA_LOC692458.1.1	GCAACAAGCCATACGACAAG	AACGCATGGTGGTAGTTGTG	GCAACAAGCCATACGA CAAGAACATGTTACCCGCTCAGAACCTCCCCGTCTCCTTCATAGCGTTCGGCGAAGGTTTCCACAACTAC CACCATGCGTT	TTACGGCCGGGGGCCAGTACAGACAACCTACGGAGAGTACATAACGTATTGTGTATTAATTTCTTATACTTCCTTTTTTCTACTTTCCGCTAATTATGTCGCTGCATAAGAATGCATAAAACAAATCTTCCGTTGCATCTGTCTGTCTATACCTACGCGATTAACTCAAAGAGTTCACGCGTTTTTAGTGGTGTGCGCGGTGGATTTACAAGACGGAGGTCCTGGGTTCGATCCTCGGCTGGGCCGACTGAGACAAAATGGCGCCCTCCGCAACAGAAACTACCACCATAACAGAGACCGAAGAGACACTTCCCAAGCTCGTCGCCCCCCAAGCAGCGCCCAGGAAATATGACATAATCTACTTCAACCTGCTTACATTCGGCTACGCGCATCTCGCTA…
aldose reductase	GS8R7LM03D3OA9.b.ba.1	BA_LOC658019.3.5	CTGATCGTGATCCCCAAGAC	CTGCAGCAGCTCCATATCCT	CTGATCGTGATCCCCAAGACGGTGACTCGCAGCCGCCTGCAGCAGAACATGGAGGTGTTCGACTTCCAGCTGTCGCCCCAGGATATGGAGCTGCTGCAG	GGCCATTACGGCCGGGGGACTTCAGTGGTTAGAGCTGCAGAGTAACGTGCAACACAACCTAGAAGTATGCAAGATAAGCCTCAAGTACCGCTAATCGTATTGAATAATGGAAGAACCTGCCCTATTCTTGGGCTTGGAACTTGGAAGCAACTAGGCAATGTTATGCTTCGTCAGTCCGCGCCTGGCGACGTGATGCGCGCGGTGAAGGACGCCATCGACGTGGGCTACCGTCACATCGACTGCGCGTTCGTGTATGGGAACGAGAAGGAGGTGGGCGAAGCTCTGAAGACCAAGTTCCAGGAAGGAGTCGTTAAGAGGGAAGACATGTTCGTGACATCCAAGCTCTGGAATACGTACCACCGCCCCGACCTGGTGGAGGGCGCGCTGAAGGCTTCGCTA…
unannotated 1	GS8R7LM03EA6TV.b.ba.1	BA_AAEL_AAEL005737.1.3	TGATCTGCTGAACCGATTTG	CCAGAACATCAGGGCTAACTT	TGATCTGCTGAACCGATTTGTTACCGACTCAAAAATAATTTACCTGACAACGCGTAACTAAGTTAGCCCTGATGTTCTGG	TTACGGCCGGGGGTATTTTCTAGAGTATCTGCTGGGATAACACGTGTAATTGCGTATCAATCGTTATAGAAATGATTATAATTTTAAAACGAAGATCGTACGCTTATTAGAATTATCTAAGCTGGTGCATTTTATTTGATAGAGTTTTTGTGTTCGGTGCTTAAAGCTATTTGTTAAATATATTAGTGTAGTACAGTAACTCCCAGAAATGGCTCCAAATGTAACTGAATGGGTTCAAGAAGCCGAAGAACGCGCCGCACTAAAAAAGACTCATGTCAGTTTCCCTCAACTCAAATACCCGTCTTTACGAGATGAACCATTTAAAGACCCTTTACAATGGCTTACCGGAAAAGCATTGGACGACGGCGCCGAAGGACTTTGGAGAGTTCATGATAAATT…
FAR2 gene Alok	GS8R7LM02CFHMJ.b.ba.1	BA_FACR1.6.12	TGATGCGCAAGTCAAAGAAC	AGGTACATGCCCATGGTTGT	TGATGCGCAAGTCAAAGAACTTATCAAGGGCAGACCCAATACGTACACATTTACAAAAGCCTTAGCAGAGAATCTCGTTGCTGACAACCATGGGCATGTACCT	GATTATTATTGAAGCTGTGAGTTTCTTATATTTAATTAAATAACATAAAATTAACAACTGCATAACTGTTGATTGTTGATCGTCATTTGATTCTATTATTTATCGTTTTTTGTTAACACTGGTTGCCAATCATAGGATTAAATTTAAAAAAAACCTTGTGATGGGGAATAATTATTATAATAAACAATAATACCTTTTATGTAATAATAATATATAATTGTTTGTTTGAAGATCAAGATGTATCGAAATGTTAACAACAATTACAAGGGTCATTCTGTTTATACAAATGGCGCAGGATCCCGTGTAAAGTCACTGCTTTCGTCGGCAACCGACAACACAAACGAGTACCAGAGCATAGCGGAGTGTTACAAAGGGCAATCAGTTTTTATAACAGGGGGC…
RECEPTION
Orco	GW3I2KR01B2RV5.b.ba.1	BA_OR83B.1.1	GGTACGATGGCTCCGAAGAGG	CAATGAGACGGTGAAGAACTTGGC	GGTACGATGGCTCCGAAGAGGCGAAGACCTTCGTGCAGATTGTCTGCCAGCAGTGTCAGAAGGCTATGAGCATTTCTGGCGCCAAGTTCTTCACCGTCTCATTG
OR1	GZKG99Z02DT2MR.b.ba.1	BA_OR-35.1.1	CCTCTGCTGAGGCCTGGTAG	CGTAGTTTGGTGATTCCAGCATAGG	CCTCTGCTGAGGCCTGGTAGACACGTCACCGAGGAGATGTATATCCTTTACGGCTTGGAACCTATGCTGGAATCACCAAACTACG
OR2	GZXD38A02FY60I.b.ba.1	BA_OR-65.2.2	GATCAACTTCGACTGCGAAGTGC	CATCCGACGAGGGTCATGTTTG	GATCAACTTCGACTGCGAAGTGCTGTTCGTCGGTTTGGATGAGAGCGTGGTGCGATTGCCCAAACATGACCCTCGTCGGATG
DEVELOPMENT
LIM+SH3 domain	GW3I2KR01BD0MM.b.ba.1	BA_LASP.2.2	CGCCGTCATCAACTAACAAG	CACGTCACTAATTCGGTCAA	CGCCGTCATCAACTAACAAGTCACTGACTCTATATTAGAAAACAATTAATCGAACACTCCAGAAAATAATTTCGTCTGACGCTGTCACCAATTAACACGTCACTAATTCGGTCAA	TTTCTTTTTCTTTTTGGATTAATTATTTTCTATTTTGACCGAATTAGTGACGTGTTAATTGGTGACAGCGTCAGACGAAATTATTTTCTGGAGTGTTCGATTAATTGTTTTCTAATATAGAGTCAGTGACTTGTTAGTTGATGACGGCGTCAGTGAGTCTGACGCGCGTCAGACGAAGTTATTTTTCCAGAGTGTTCGATGAATTATTTACTAATTTGGCCGAGTCAGTGACGTGTTACTTGGTGACGGCGTCTGTAAGTCTGACGAGCGTCAGACAGTTATACTCTCATGCGTGTTCGATCAATTATTTTCTAATTTGGCCGAGTCAGTGACGTGTTACTTGGTGTCAGTGAGTCTGACGCACGTCAGTGGGTCTGACGCGCGTCAGGCGCCAACTCC…
catalase	GE720623.b.ba.1	BA_LOC100159682.2.2	TTCTAGGTGGCATCGTCCTC	CGACAGAACCTTCCACGAGT	TTCTAGGTGGCATCGTCCTCGTGCGCTAAATAACATGGCCCTATGTCAGCCAGTCGGTGTGTGCAGCCCAAAGTGTCGTGCGACAGAACCTTCCACGAGT	TTACGGCCGGGGATAAAAGCGTTGATCGTCAATAATAACAGACGGGATTACAATTAAATAATGTAAATGATTTATTTTAATCCAAAAATGATACATATTAAATACGTGTTATGTATATTCGCGGTGTGTATAGTTAATGTGCTATGCGGTAAAGAATACGACGTATATTTGAACACAACCGACCCTGCAACATGTCAAGTATACGAATTCAGACATTCTCACTCAAAACCGATAGGAATACTTACAACTAGTTCTGGAAAGTTGGTGGATATAAGAGAGACCGTTGCGTTGAACTCTGATGCTTTTTCAAACCAGCATCACATAGATTTAATGACACATATAGACGCTGAGAGAATCCCCGAAAGACTCGTGCACGCTAAAGGAGGCGGCGCATTTGGC…
unannotated 2	GE657527.b.ba.1	BA_contig_080195	CGGCTGTAGTGTGTTCTTGC	GCAATGAAGTGTACCTGACGTT	CGGCTGTAGTGTGTTCTTGCATACGCGTTTGTATGCAAAAATACACGTACGTCATTAGAAGTAGGCCGACTGAATGTATTTCCACTGCAATGAAGTGTACCTGACGTT	ACCCAGTGGCGTGCAAAAACTTTTTAAGGCAGTTCTATTCATACATATAAACTGTACAATGGCAAATTCTTTCTCCATTACAGGGTCTGAAGCCATGTGACACGGCGATTTCCTTTCTAAAAGCGCAGACGCTTCGAAAATTAAAAAAATGCATGGGACATTCGTTGACATTCGTTATCGACAGCTCACGTGATCCAGTTGTCGTTCGGATCTGTCATTTCCATATTTTTTTTAGTTTTCAAAGCGTTAGCGTTTGTAGAAAGTGAATCTAGCCACATGGCTACAGACCCCAGTTCGTAATGTGACCTCAGGTTAGGCAGTGCATTTTAGCATCTGTGGACTGCACATCACTCTAACACTGTGTAATCCATATGGACAGCTTCAAGTACCTACATCTTT…
