# Supplementary material for: Mosaic Evolution of Molecular Pathways for Sex Pheromone Communication in a Butterfly
Source: Genes (Basel). 2022 Jul 31;13(8):1372. doi: 10.3390/genes13081372 (PMC9407440; doi:10.3390/genes13081372)
Supplement: Supplementary file 1 [file genes-13-01372-s001.zip › Supplementary Table S7.xlsx]

## Sheet: Supplementary Table S7
	No of reads
Total	795
Male adult androconia wing	171
Male adult control wing	0
Female adult wing control	0
Female brain	363
Male brain	0
Antenna	51
Male pupal androconial wings	102
Control pupal wings	108
