# Supplementary material for: Mosaic Evolution of Molecular Pathways for Sex Pheromone Communication in a Butterfly
Source: Genes (Basel). 2022 Jul 31;13(8):1372. doi: 10.3390/genes13081372 (PMC9407440; doi:10.3390/genes13081372)
Supplement: Supplementary file 1 [file genes-13-01372-s001.zip › Supplementary Table S8.xlsx]

## Sheet: Supplementary Table S8
	No of reads
Total	28
Male adult androconia wing	5
Male adult control wing	5
Female adult wing control	0
Female brain	5
Male brain	0
Antenna	7
Pupal wings	6
