# Supplementary material for: Mosaic Evolution of Molecular Pathways for Sex Pheromone Communication in a Butterfly
Source: Genes (Basel). 2022 Jul 31;13(8):1372. doi: 10.3390/genes13081372 (PMC9407440; doi:10.3390/genes13081372)
Supplement: Supplementary file 1 [file genes-13-01372-s001.zip › Supplementary Table S9.xlsx]

## Sheet: Supplementary Table S9
Courtship behavior	Estimate	Std. Error	Lik. ratio	df	p	significance
Intercept	-2.706	0.710
Age (days)	-0.198	0.067	7.87	1	0.005	**
Time (hours)	0.476	0.151	12.41	1	0.0004	***
Time² (hours²)	-0.024	0.009	7.99	1	0.005	**
