# Supplementary material for: Mosaic Evolution of Molecular Pathways for Sex Pheromone Communication in a Butterfly
Source: Genes (Basel). 2022 Jul 31;13(8):1372. doi: 10.3390/genes13081372 (PMC9407440; doi:10.3390/genes13081372)
Supplement: Supplementary file 1 [file genes-13-01372-s001.zip › Supplementary Table S10.xlsx]

## Sheet: Supplementary Table S10
A: Log (MSP1/MSP2)	Estimate	Std. Error	Lik. ratio	df	p	significance
Intercept	2.8601	0.1336
Time (hours)	－0.0748	0.0249	8.51	1	0.003	**
Time² (hours²)	0.003	0.001	8.28	1	0.004	**
B: Log (MSP1/MSP3)	Estimate	Std. Error	Lik. ratio	df	p	significance
Intercept	－1.4944	0.0664
Time (hours)	0.0039	0.0068	0.34	1	0.559
Time² (hours²)	-0.0002	0.0003	0.79	1	0.372
C: Log (MSP2/MSP3)	Estimate	Std. Error	Lik. ratio	df	p	significance
Intercept	－4.3552	0.1315
Time (hours)	0.0799	0.026	9.28	1	0.002	**
Time² (hours²)	－0.0033	0.0011	9.67	1	0.002	**
D: MSP 1 (Square root transf.)	Estimate	Std. Error	Lik. ratio	df	p	significance
Intercept	58, 681		3.794
Time (hours)	-0.864	0.54	2,50	1	0.114
Time² (hours²)	0.037	0.022	2.8	1	0.094	*
E: MSP 2 (Square root transf.)	Estimate	Std. Error	Lik. ratio	df	p	significance
Intercept	14.343	1.026
Time (hours)	0.313	0.187	2.88	1	0.09	*
Time² (hours²)	－0.013	0.008	2.84	1	0.092
F: MSP 3 (Square root transf.)	Estimate	Std. Error	Lik. ratio	df	p	significance
Intercept	123.477		6.787
Time (hours)	－1.921	1.166	2.66	1	0.103	*
Time² (hours²)	0.087	0.047	3.29	1	0.07	*
